# Supplementary material for: p63 exerts spatio-temporal control of palatal epithelial cell fate to prevent cleft palate
Source: PLoS Genet. 2017 Jun 12;13(6):e1006828. doi: 10.1371/journal.pgen.1006828 (PMC5484519; doi:10.1371/journal.pgen.1006828)
Supplement: S1 Table — (XLSX) [file pgen.1006828.s013.xlsx]

## Sheet: 6295 peaks classification
chrom	start	end	name	score	overlap type	refgene ID	chrom	strand	TSS	TES	CDS start	CDS end	Exon count	Exon starts	Exon ends	score	alternate name	cds start status	cds end status	exon frame
chr1	3659611	3660079	MACS_peak_1	133.43	TSS	NM_001011874	chr1	-	3204562	3661579	3206102	3661429	3	3204562,3411782,3660632,	3207049,3411982,3661579,	0	Xkr4	cmpl	cmpl	1,2,0,
chr1	6846804	6847301	MACS_peak_2	51.44	INTRAGENIC	NM_001244693	chr1	+	6477311	6851021	6758978	6848681	23	6477311,6477698,6743074,6758978,6761024,6785466,6792400,6797623,6799357,6800654,6807683,6810014,6817856,6823643,6832219,6832953,6834201,6834371,6835651,6838987,6845449,6847380,6848540,	6477486,6477822,6743117,6759033,6761055,6785657,6793186,6797758,6799448,6800759,6807877,6810226,6818102,6823759,6832282,6833022,6834264,6834452,6835873,6839076,6845553,6847524,6851021,	0	St18	cmpl	cmpl	-1,-1,-1,0,1,2,1,1,1,2,2,1,0,0,2,2,2,2,2,2,1,0,0,
chr1	6846804	6847301	MACS_peak_2	51.44	INTRAGENIC	NR_045189	chr1	+	6720131	6851021	6851021	6851021	23	6720131,6742376,6743074,6758978,6761024,6785466,6792400,6797623,6799357,6800654,6807683,6810014,6817856,6823643,6832219,6832953,6834201,6834371,6835651,6838987,6845449,6847380,6848540,	6720321,6742449,6743117,6759033,6761055,6785657,6793186,6797758,6799448,6800759,6807877,6810226,6818102,6823759,6832282,6833022,6834264,6834452,6835873,6839076,6845553,6847524,6851021,	0	St18	unk	unk	-1,-1,-1,-1,-1,-1,-1,-1,-1,-1,-1,-1,-1,-1,-1,-1,-1,-1,-1,-1,-1,-1,-1,
chr1	6846804	6847301	MACS_peak_2	51.44	INTRAGENIC	NM_173868	chr1	+	6720131	6851021	6758978	6848681	22	6720131,6743074,6758978,6761024,6785466,6792400,6797623,6799357,6800654,6807683,6810014,6817856,6823643,6832219,6832953,6834201,6834371,6835651,6838987,6845449,6847380,6848540,	6720321,6743117,6759033,6761055,6785657,6793186,6797758,6799448,6800759,6807877,6810226,6818102,6823759,6832282,6833022,6834264,6834452,6835873,6839076,6845553,6847524,6851021,	0	St18	cmpl	cmpl	-1,-1,0,1,2,1,1,1,2,2,1,0,0,2,2,2,2,2,2,1,0,0,
chr1	6846804	6847301	MACS_peak_2	51.44	INTRAGENIC	NM_001244692	chr1	+	6477311	6851021	6758978	6848681	24	6477311,6477698,6727660,6743074,6758978,6761024,6785466,6792400,6797623,6799357,6800654,6807683,6810014,6817856,6823643,6832219,6832953,6834201,6834371,6835651,6838987,6845449,6847380,6848540,	6477486,6477822,6727738,6743117,6759033,6761055,6785657,6793186,6797758,6799448,6800759,6807877,6810226,6818102,6823759,6832282,6833022,6834264,6834452,6835873,6839076,6845553,6847524,6851021,	0	St18	cmpl	cmpl	-1,-1,-1,-1,0,1,2,1,1,1,2,2,1,0,0,2,2,2,2,2,2,1,0,0,
chr1	6846804	6847301	MACS_peak_2	51.44	INTRAGENIC	NR_045188	chr1	+	6720131	6851021	6851021	6851021	24	6720131,6727660,6742376,6743074,6758978,6761024,6785466,6792400,6797623,6799357,6800654,6807683,6810014,6817856,6823643,6832219,6832953,6834201,6834371,6835651,6838987,6845449,6847380,6848540,	6720321,6727738,6742449,6743117,6759033,6761055,6785657,6793186,6797758,6799448,6800759,6807877,6810226,6818102,6823759,6832282,6833022,6834264,6834452,6835873,6839076,6845553,6847524,6851021,	0	St18	unk	unk	-1,-1,-1,-1,-1,-1,-1,-1,-1,-1,-1,-1,-1,-1,-1,-1,-1,-1,-1,-1,-1,-1,-1,-1,
chr1	7387591	7388585	MACS_peak_3	125.85	NONE
chr1	9628771	9629397	MACS_peak_4	204.95	DOWNSTREAM	NM_178399	chr1	+	9591347	9617223	9591664	9614977	6	9591347,9597054,9603392,9609916,9612673,9614793,	9591731,9597110,9603555,9609978,9612765,9617223,	0	3110035E14Rik	cmpl	cmpl	0,1,0,1,0,2,
chr1	9738332	9738940	MACS_peak_5	56.56	TSS	NR_040462	chr1	+	9737728	9761337	9761337	9761337	4	9737728,9742529,9760752,9761040,	9738685,9742645,9760876,9761337,	0	1700034P13Rik	unk	unk	-1,-1,-1,-1,
chr1	9789875	9790542	MACS_peak_6	149.08	TSS	NM_133220	chr1	+	9788210	9892649	9855333	9888971	18	9788210,9817093,9855211,9858463,9861710,9862338,9867246,9869106,9870412,9871658,9871840,9874487,9874705,9875747,9876127,9878950,9881441,9888800,	9788327,9817200,9855429,9858547,9861783,9862414,9867334,9869156,9870470,9871742,9871972,9874600,9874742,9875834,9876223,9879106,9881531,9892649,	0	Sgk3	cmpl	cmpl	-1,-1,0,0,0,1,2,0,2,0,0,0,2,0,0,0,0,0,
chr1	9837438	9837990	MACS_peak_7	54.03	TSS	NM_001037759	chr1	+	9838361	9892649	9855333	9888971	17	9838361,9855211,9858463,9861710,9862338,9867246,9869106,9870412,9871658,9871840,9874487,9874705,9875747,9876127,9878950,9881441,9888800,	9838466,9855429,9858547,9861783,9862414,9867334,9869156,9870470,9871742,9871972,9874600,9874742,9875834,9876223,9879106,9881531,9892649,	0	Sgk3	cmpl	cmpl	-1,0,0,0,1,2,0,2,0,0,0,2,0,0,0,0,0,
chr1	10319755	10320433	MACS_peak_8	72.31	NONE
chr1	10560945	10561566	MACS_peak_9	55.52	NONE
chr1	10626998	10627784	MACS_peak_10	177.49	TSS	NM_177834	chr1	-	10314807	10710024	10315204	10709808	11	10314807,10319553,10327347,10398349,10399337,10467105,10471094,10474029,10478905,10585700,10709692,	10315392,10319638,10327550,10398440,10399448,10467210,10471196,10474144,10479030,10585776,10710024,	0	Cpa6	cmpl	cmpl	1,0,1,0,0,0,0,2,0,2,0,
chr1	11276009	11276571	MACS_peak_11	53.2	INTRAGENIC	NM_029525	chr1	+	10983545	11293763	10983873	11287834	40	10983545,11051406,11055874,11058091,11070103,11079797,11088543,11091144,11097683,11100362,11102823,11113201,11113894,11122418,11126845,11130036,11130316,11132729,11139890,11143623,11146321,11150176,11152320,11159933,11160664,11171935,11174526,11175210,11175967,11176717,11183593,11189915,11194146,11198592,11221762,11255759,11256049,11275137,11279333,11287788,	10983990,11051478,11055997,11058196,11070205,11079959,11088677,11091248,11097833,11100507,11102924,11113305,11113944,11122494,11126918,11130179,11130409,11132878,11139976,11143760,11146439,11150361,11152482,11160156,11160872,11172115,11174621,11175293,11176058,11176846,11183635,11190133,11194249,11198736,11221877,11255826,11256240,11275240,11279401,11293763,	0	Prex2	cmpl	cmpl	0,0,0,0,0,0,0,2,1,1,2,1,0,2,0,1,0,0,2,1,0,1,0,0,1,2,2,1,0,1,1,1,0,1,1,2,0,2,0,2,
chr1	11276009	11276571	MACS_peak_11	53.2	INTRAGENIC	NM_001033636	chr1	+	11254043	11293763	11256052	11287834	6	11254043,11255759,11256049,11275137,11279333,11287788,	11254176,11255826,11256240,11275240,11279401,11293763,	0	Prex2	cmpl	cmpl	-1,-1,0,2,0,2,
chr1	11552004	11552480	MACS_peak_12	53.3	INTRAGENIC	NM_001160369	chr1	+	11404185	11965983	11404649	11965047	14	11404185,11501998,11508658,11535234,11553043,11578454,11586231,11738045,11788561,11819895,11923624,11941043,11962126,11965003,	11404718,11502146,11508790,11535363,11553072,11578627,11586398,11738181,11788647,11819972,11923672,11941137,11962183,11965983,	0	A830018L16Rik	cmpl	cmpl	0,0,1,1,1,0,2,1,2,1,0,0,1,1,
chr1	11552004	11552480	MACS_peak_12	53.3	INTRAGENIC	NM_177173	chr1	+	11404185	11965983	11404649	11965047	14	11404185,11501998,11508658,11535234,11553043,11578454,11586231,11738045,11788561,11819895,11923624,11941043,11962126,11965003,	11404718,11502146,11508790,11535363,11553072,11578627,11586398,11738172,11788647,11819972,11923672,11941137,11962183,11965983,	0	A830018L16Rik	cmpl	cmpl	0,0,1,1,1,0,2,1,2,1,0,0,1,1,
chr1	11552004	11552480	MACS_peak_12	53.3	INTRAGENIC	NM_001160370	chr1	+	11404185	11591902	11404649	11586415	7	11404185,11501998,11508658,11535234,11553043,11578454,11586231,	11404718,11502146,11508790,11535363,11553072,11578627,11591902,	0	A830018L16Rik	cmpl	cmpl	0,0,1,1,1,0,2,
chr1	11552004	11552480	MACS_peak_12	53.3	INTRAGENIC	NM_001160371	chr1	+	11404185	11591902	11404649	11587065	8	11404185,11501998,11508658,11535234,11553043,11578454,11586231,11587045,	11404718,11502146,11508790,11535363,11553072,11578627,11586398,11591902,	0	A830018L16Rik	cmpl	cmpl	0,0,1,1,1,0,2,1,
chr1	11789077	11789656	MACS_peak_13	51.84	INTRAGENIC	NM_001160369	chr1	+	11404185	11965983	11404649	11965047	14	11404185,11501998,11508658,11535234,11553043,11578454,11586231,11738045,11788561,11819895,11923624,11941043,11962126,11965003,	11404718,11502146,11508790,11535363,11553072,11578627,11586398,11738181,11788647,11819972,11923672,11941137,11962183,11965983,	0	A830018L16Rik	cmpl	cmpl	0,0,1,1,1,0,2,1,2,1,0,0,1,1,
chr1	11789077	11789656	MACS_peak_13	51.84	INTRAGENIC	NM_177173	chr1	+	11404185	11965983	11404649	11965047	14	11404185,11501998,11508658,11535234,11553043,11578454,11586231,11738045,11788561,11819895,11923624,11941043,11962126,11965003,	11404718,11502146,11508790,11535363,11553072,11578627,11586398,11738172,11788647,11819972,11923672,11941137,11962183,11965983,	0	A830018L16Rik	cmpl	cmpl	0,0,1,1,1,0,2,1,2,1,0,0,1,1,
chr1	12045739	12046444	MACS_peak_14	69.95	NONE
chr1	12766529	12767142	MACS_peak_15	94.64	INTRAGENIC	NM_172294	chr1	+	12708625	12850453	12776607	12848923	22	12708625,12718674,12776159,12776548,12786846,12795260,12797934,12807418,12808458,12810481,12810875,12812050,12826193,12828439,12829909,12830483,12831523,12832729,12838175,12838411,12840840,12848892,	12708864,12718769,12776232,12776779,12787086,12795412,12798104,12807569,12808634,12810610,12810932,12812180,12826410,12828692,12830006,12830578,12831589,12832905,12838318,12838535,12840874,12850453,	0	Sulf1	cmpl	cmpl	-1,-1,-1,0,1,1,0,2,0,2,2,2,0,1,2,0,2,2,1,0,1,2,
chr1	12766529	12767142	MACS_peak_15	94.64	INTRAGENIC	NM_001198565	chr1	+	12682510	12850453	12776607	12848923	22	12682510,12718674,12776159,12776548,12786846,12795260,12797934,12807418,12808458,12810481,12810875,12812050,12826193,12828439,12829909,12830483,12831523,12832729,12838175,12838411,12840840,12848892,	12682765,12718769,12776232,12776779,12787086,12795412,12798104,12807569,12808634,12810610,12810932,12812180,12826410,12828692,12830006,12830578,12831589,12832905,12838318,12838535,12840874,12850453,	0	Sulf1	cmpl	cmpl	-1,-1,-1,0,1,1,0,2,0,2,2,2,0,1,2,0,2,2,1,0,1,2,
chr1	12766529	12767142	MACS_peak_15	94.64	TSS	NM_001198566	chr1	+	12682510	12850453	12776607	12848923	21	12682510,12776159,12776548,12786846,12795260,12797934,12807418,12808458,12810481,12810875,12812050,12826193,12828439,12829909,12830483,12831523,12832729,12838175,12838411,12840840,12848892,	12682765,12776232,12776779,12787086,12795412,12798104,12807569,12808634,12810610,12810932,12812180,12826410,12828692,12830006,12830578,12831589,12832905,12838318,12838535,12840874,12850453,	0	Sulf1	cmpl	cmpl	-1,-1,0,1,1,0,2,0,2,2,2,0,1,2,0,2,2,1,0,1,2,
chr1	12800632	12801266	MACS_peak_16	84.23	INTRAGENIC	NM_172294	chr1	+	12708625	12850453	12776607	12848923	22	12708625,12718674,12776159,12776548,12786846,12795260,12797934,12807418,12808458,12810481,12810875,12812050,12826193,12828439,12829909,12830483,12831523,12832729,12838175,12838411,12840840,12848892,	12708864,12718769,12776232,12776779,12787086,12795412,12798104,12807569,12808634,12810610,12810932,12812180,12826410,12828692,12830006,12830578,12831589,12832905,12838318,12838535,12840874,12850453,	0	Sulf1	cmpl	cmpl	-1,-1,-1,0,1,1,0,2,0,2,2,2,0,1,2,0,2,2,1,0,1,2,
chr1	12800632	12801266	MACS_peak_16	84.23	INTRAGENIC	NM_001198565	chr1	+	12682510	12850453	12776607	12848923	22	12682510,12718674,12776159,12776548,12786846,12795260,12797934,12807418,12808458,12810481,12810875,12812050,12826193,12828439,12829909,12830483,12831523,12832729,12838175,12838411,12840840,12848892,	12682765,12718769,12776232,12776779,12787086,12795412,12798104,12807569,12808634,12810610,12810932,12812180,12826410,12828692,12830006,12830578,12831589,12832905,12838318,12838535,12840874,12850453,	0	Sulf1	cmpl	cmpl	-1,-1,-1,0,1,1,0,2,0,2,2,2,0,1,2,0,2,2,1,0,1,2,
chr1	12800632	12801266	MACS_peak_16	84.23	INTRAGENIC	NM_001198566	chr1	+	12682510	12850453	12776607	12848923	21	12682510,12776159,12776548,12786846,12795260,12797934,12807418,12808458,12810481,12810875,12812050,12826193,12828439,12829909,12830483,12831523,12832729,12838175,12838411,12840840,12848892,	12682765,12776232,12776779,12787086,12795412,12798104,12807569,12808634,12810610,12810932,12812180,12826410,12828692,12830006,12830578,12831589,12832905,12838318,12838535,12840874,12850453,	0	Sulf1	cmpl	cmpl	-1,-1,0,1,1,0,2,0,2,2,2,0,1,2,0,2,2,1,0,1,2,
chr1	13563886	13564439	MACS_peak_17	53.95	NONE
chr1	13838949	13839843	MACS_peak_18	275.79	NONE
chr1	14151364	14151829	MACS_peak_19	70.14	DOWNSTREAM	NM_001252192	chr1	-	14159038	14300280	14160996	14294530	17	14159038,14169560,14173237,14173461,14174429,14174706,14198975,14219573,14221493,14242508,14243100,14260785,14264145,14264614,14273201,14294505,14299726,	14161077,14169661,14173359,14173576,14174590,14174765,14199065,14219657,14221633,14242695,14243183,14260923,14264288,14264684,14273279,14294555,14300280,	0	Eya1	cmpl	cmpl	0,1,2,1,2,0,0,0,1,0,1,1,2,1,1,0,-1,
chr1	14151364	14151829	MACS_peak_19	70.14	DOWNSTREAM	NM_010164	chr1	-	14159038	14300280	14160996	14292974	18	14159038,14169560,14173237,14173461,14174429,14174706,14198975,14219573,14221493,14242508,14243100,14260785,14264145,14264614,14273201,14292850,14294505,14299726,	14161077,14169661,14173359,14173576,14174590,14174765,14199065,14219657,14221633,14242695,14243183,14260908,14264291,14264684,14273279,14292978,14294555,14300280,	0	Eya1	cmpl	cmpl	0,1,2,1,2,0,0,0,1,0,1,1,2,1,1,0,-1,-1,
chr1	14477692	14478189	MACS_peak_20	51.44	NONE
chr1	16094692	16095374	MACS_peak_21	50.98	TSS	NM_133832	chr1	+	16095962	16122631	16096098	16121498	6	16095962,16097875,16118245,16119276,16121155,16121374,	16096387,16098111,16118344,16119422,16121287,16122631,	0	Rdh10	cmpl	cmpl	0,1,0,0,2,2,
chr1	16917780	16918255	MACS_peak_22	53.39	NONE
chr1	17040297	17040796	MACS_peak_23	137.89	NONE
chr1	17364504	17365295	MACS_peak_24	176.74	NONE
chr1	19221584	19222050	MACS_peak_25	133.78	INTRAGENIC	NM_001025305	chr1	+	19202134	19228815	19202477	19224428	7	19202134,19204031,19209273,19216516,19218522,19221093,19224130,	19202504,19204490,19209334,19216736,19218641,19221235,19228815,	0	Tfap2b	cmpl	cmpl	0,0,0,1,2,1,2,
chr1	19221584	19222050	MACS_peak_25	133.78	INTRAGENIC	NM_009334	chr1	+	19198994	19228815	19199248	19224428	7	19198994,19204031,19209273,19216516,19218522,19221093,19224130,	19199329,19204490,19209334,19216736,19218641,19221235,19228815,	0	Tfap2b	cmpl	cmpl	0,0,0,1,2,1,2,
chr1	19941713	19942349	MACS_peak_26	54.35	NONE
chr1	20538519	20539293	MACS_peak_27	71.34	NONE
chr1	21208352	21209022	MACS_peak_28	73.04	TSS	NM_029398	chr1	+	21208711	21220248	21215654	21219711	5	21208711,21215638,21216025,21216672,21219671,	21208970,21215724,21216127,21216760,21220248,	0	Tmem14a	cmpl	cmpl	-1,0,1,1,2,
chr1	21443143	21443806	MACS_peak_29	59.18	NONE
chr1	21456352	21457054	MACS_peak_30	63.08	NONE
chr1	24107224	24107788	MACS_peak_31	53.04	TSS	NM_026604	chr1	-	24017596	24107180	24019130	24092326	21	24017596,24021617,24027513,24028692,24031051,24031620,24033446,24035038,24037580,24039501,24050952,24053196,24060021,24060842,24062582,24064042,24064204,24074737,24092249,24093358,24106899,	24019336,24021731,24027624,24028844,24031149,24031712,24033607,24037367,24037735,24039575,24051108,24053246,24060175,24060969,24062756,24064113,24064344,24074817,24092365,24093450,24107180,	0	Fam135a	cmpl	cmpl	1,1,1,2,0,1,2,1,2,0,0,1,0,2,2,0,1,2,0,-1,-1,
chr1	24530954	24531450	MACS_peak_32	51.53	NONE
chr1	24619406	24619980	MACS_peak_33	281.75	NONE
chr1	25610374	25611023	MACS_peak_34	53.37	NONE
chr1	26742597	26743292	MACS_peak_35	78.23	TSS	NM_001033764	chr1	-	26738645	26744305	26738796	26744271	2	26738645,26744085,	26742756,26744305,	0	4931408C20Rik	cmpl	cmpl	0,0,
chr1	26743344	26745331	MACS_peak_36	358.77	TSS	NM_001033764	chr1	-	26738645	26744305	26738796	26744271	2	26738645,26744085,	26742756,26744305,	0	4931408C20Rik	cmpl	cmpl	0,0,
chr1	34019850	34020233	MACS_peak_37	62.3	NONE
chr1	34216708	34217332	MACS_peak_38	195.13	INTRAGENIC	NM_133833	chr1	+	34068669	34365497	34068669	34364437	93	34068669,34143086,34170777,34172962,34174276,34191934,34209046,34209257,34211357,34213443,34213625,34217464,34217848,34219853,34220470,34220741,34220920,34221171,34221902,34223024,34223786,34224120,34224455,34224667,34226008,34226594,34227204,34227960,34229027,34229846,34230959,34231541,34240860,34242806,34243663,34254045,34255362,34256136,34257714,34259289,34265398,34267998,34269066,34269746,342…	34068760,34143148,34170867,34173040,34174369,34192101,34209159,34209364,34211477,34213539,34213753,34217558,34218003,34220316,34220599,34220819,34221082,34221276,34221998,34223150,34223936,34224275,34224582,34224851,34226166,34226773,34227343,34228154,34229190,34229930,34231067,34231640,34240989,34242895,34243796,34254198,34255596,34256403,34258260,34259466,34265522,34268207,34269384,34269913,342…	0	Dst	cmpl	cmpl	0,1,0,0,0,0,2,1,0,0,0,2,0,2,0,0,0,0,0,0,0,0,2,0,1,0,2,0,2,0,0,0,0,0,2,0,0,0,0,0,0,1,0,0,2,0,1,1,0,1,0,1,0,0,0,2,0,1,0,0,0,0,0,0,1,0,0,0,0,0,0,0,0,0,0,0,0,2,0,0,0,0,0,1,0,1,0,0,0,1,1,0,1,
chr1	34216708	34217332	MACS_peak_38	195.13	INTRAGENIC	NM_134448	chr1	+	34068669	34365497	34068669	34364437	98	34068669,34143086,34170777,34172962,34174276,34191934,34209046,34209257,34211357,34213443,34213625,34217464,34217848,34219853,34220470,34220741,34220920,34221171,34221902,34223024,34223786,34224120,34224455,34224667,34226008,34226594,34227204,34227960,34229027,34229846,34230959,34231541,34240860,34242806,34243663,34244816,34250236,34250849,34251359,34252672,34254045,34255362,34256136,34257714,342…	34068760,34143148,34170867,34173040,34174369,34192101,34209159,34209364,34211477,34213539,34213753,34217558,34218003,34220316,34220599,34220819,34221082,34221276,34221998,34223150,34223936,34224275,34224582,34224851,34226166,34226773,34227343,34228154,34229190,34229930,34231067,34231640,34240989,34242895,34243796,34250108,34250386,34251065,34251509,34252906,34254198,34255596,34256403,34258260,342…	0	Dst	cmpl	cmpl	0,1,0,0,0,0,2,1,0,0,0,2,0,2,0,0,0,0,0,0,0,0,2,0,1,0,2,0,2,0,0,0,0,0,2,0,0,0,0,0,0,0,0,0,0,0,1,0,0,2,0,1,1,0,1,0,1,0,0,0,2,0,1,0,0,0,0,0,0,1,0,0,0,0,0,0,0,0,0,0,0,0,2,0,0,0,0,0,1,0,1,0,0,0,1,1,0,1,
chr1	34799109	34799618	MACS_peak_39	73.46	NONE
chr1	35742416	35742916	MACS_peak_40	51.18	NONE
chr1	36087571	36088036	MACS_peak_41	54.31	NONE
chr1	36116518	36117424	MACS_peak_42	224.54	UPSTREAM	NM_015818	chr1	+	36125244	36163291	36125502	36161066	2	36125244,36160357,	36126029,36163291,	0	Hs6st1	cmpl	cmpl	0,2,
chr1	36603942	36604483	MACS_peak_43	62.38	DOWNSTREAM	NM_027957	chr1	-	36619540	36650177	36619832	36642808	6	36619540,36621174,36621675,36635363,36642760,36650042,	36619865,36621327,36621753,36635489,36642848,36650177,	0	Fam178b	cmpl	cmpl	0,0,0,0,0,-1,
chr1	36603942	36604483	MACS_peak_43	62.38	DOWNSTREAM	NM_001126046	chr1	-	36619540	36740028	36619832	36717792	15	36619540,36621174,36621675,36635363,36642760,36656967,36657252,36657711,36665261,36689264,36692011,36701054,36716208,36717579,36739712,	36619865,36621327,36621753,36635489,36642848,36657065,36657429,36657796,36665376,36689349,36692117,36701207,36716270,36717894,36740028,	0	Fam178b	cmpl	cmpl	0,0,0,0,2,0,0,2,1,0,2,2,0,0,-1,
chr1	36603942	36604483	MACS_peak_43	62.38	TSS	NM_026241	chr1	-	36595017	36604046	36596235	36604030	4	36595017,36598703,36599606,36603930,	36596379,36598907,36599710,36604046,	0	Ankrd39	cmpl	cmpl	0,0,1,0,
chr1	36663625	36664185	MACS_peak_44	76.06	NONE
chr1	36888270	36888670	MACS_peak_45	105.9	NONE
chr1	36912288	36912999	MACS_peak_46	62.36	NONE
chr1	36996793	36997398	MACS_peak_47	64.04	TSS	NM_018872	chr1	-	36849033	36996372	36849765	36996190	41	36849033,36850888,36851648,36851945,36852139,36853006,36855786,36856123,36858669,36861312,36864728,36865671,36867125,36868252,36869005,36869401,36872299,36872731,36872953,36875502,36875737,36875907,36879911,36881560,36882056,36882273,36883855,36884106,36884909,36886410,36890340,36891460,36891606,36894803,36897233,36898438,36911688,36929356,36938178,36946108,36996009,	36850050,36851043,36851746,36852042,36852261,36853169,36855936,36856248,36858797,36861491,36865321,36865830,36867311,36868439,36869148,36869553,36872366,36872841,36873092,36875620,36875813,36876060,36879998,36881665,36882191,36882384,36884026,36884260,36885018,36886519,36890402,36891517,36891757,36894884,36897356,36898555,36911812,36929425,36938219,36946170,36996372,	0	Tmem131	cmpl	cmpl	0,1,2,1,2,1,1,2,0,1,2,2,2,1,2,0,2,0,2,1,0,0,0,0,0,0,0,2,1,0,1,1,0,0,0,0,2,2,0,1,0,
chr1	37006391	37007168	MACS_peak_48	117.17	NONE
chr1	37181528	37182010	MACS_peak_49	52.76	NONE
chr1	37921503	37922211	MACS_peak_50	77.03	DOWNSTREAM	NM_026913	chr1	-	37935734	37947256	37936112	37947155	7	37935734,37936404,37937777,37938543,37939406,37942059,37947004,	37936208,37936465,37937893,37938630,37939543,37942161,37947256,	0	Mitd1	cmpl	cmpl	0,2,0,0,1,1,0,
chr1	37921503	37922211	MACS_peak_50	77.03	UPSTREAM	NM_001037918	chr1	+	37929050	37933143	37931709	37932831	2	37929050,37931708,	37929170,37933143,	0	Lipt1	cmpl	cmpl	-1,0,
chr1	37921503	37922211	MACS_peak_50	77.03	TSS	NM_207228	chr1	-	37811620	37921924	37812341	37898080	20	37811620,37817793,37818274,37820151,37840661,37858564,37861473,37863781,37867816,37872376,37876369,37891030,37892102,37892266,37897343,37898029,37899299,37906075,37912089,37921867,	37812366,37817940,37818379,37820354,37840871,37858750,37861584,37863950,37867872,37872531,37876485,37891182,37892180,37892437,37897502,37898197,37899365,37906291,37912218,37921924,	0	Tsga10	cmpl	cmpl	2,2,2,0,0,0,0,2,0,1,2,0,0,0,0,0,-1,-1,-1,-1,
chr1	38376924	38377472	MACS_peak_51	61.73	NONE
chr1	38607792	38608181	MACS_peak_52	70.7	NONE
chr1	38832569	38833049	MACS_peak_53	52.94	DOWNSTREAM	NM_001029878	chr1	-	38851353	38878060	38854873	38878060	11	38851353,38857495,38861083,38863885,38864680,38868556,38869388,38870057,38872809,38874906,38877991,	38855068,38857645,38861246,38864044,38864802,38868671,38869485,38870265,38872965,38875029,38878060,	0	Lonrf2	cmpl	cmpl	0,0,2,2,0,2,1,0,0,0,0,
chr1	39044385	39044940	MACS_peak_54	53.78	TSS	NM_026850	chr1	+	39044658	39054081	39044688	39053128	6	39044658,39048090,39051759,39052089,39052579,39052985,	39044694,39048220,39051850,39052233,39052788,39054081,	0	Pdcl3	cmpl	cmpl	0,0,1,2,2,1,
chr1	39242300	39243278	MACS_peak_55	97.14	UPSTREAM	NM_008719	chr1	+	39251116	39420085	39320188	39418852	21	39251116,39320163,39344312,39349531,39357488,39368685,39369799,39381284,39382140,39382932,39385151,39387781,39390654,39391547,39392839,39394897,39402113,39404335,39405276,39416493,39418699,	39251587,39320220,39344461,39349623,39357578,39368806,39369913,39381403,39382223,39383039,39385299,39387866,39390796,39391657,39392941,39395044,39402311,39404526,39405369,39416668,39420085,	0	Npas2	cmpl	cmpl	-1,0,2,1,0,0,1,1,0,2,1,2,0,1,0,0,0,0,2,2,0,
chr1	39451734	39452183	MACS_peak_56	55.83	DOWNSTREAM	NM_053257	chr1	+	39424695	39428755	39424993	39428178	5	39424695,39424993,39426858,39427798,39428146,	39424779,39425100,39426984,39427911,39428755,	0	Rpl31	cmpl	cmpl	-1,0,2,2,1,
chr1	39451734	39452183	MACS_peak_56	55.83	DOWNSTREAM	NM_001252219	chr1	+	39424695	39428755	39424993	39428178	5	39424695,39424993,39426858,39427798,39428146,	39424851,39425100,39426984,39427911,39428755,	0	Rpl31	cmpl	cmpl	-1,0,2,2,1,
chr1	39451734	39452183	MACS_peak_56	55.83	DOWNSTREAM	NM_001252218	chr1	+	39424695	39428755	39424993	39428178	4	39424695,39426858,39427798,39428146,	39425100,39426984,39427911,39428755,	0	Rpl31	cmpl	cmpl	0,2,2,1,
chr1	39501801	39502858	MACS_peak_57	486.36	TSS	NM_018775	chr1	-	39428341	39535592	39429193	39535411	20	39428341,39430571,39430926,39433268,39433722,39436299,39436839,39437072,39438121,39441965,39442842,39446152,39447961,39448901,39450909,39459527,39462135,39463596,39482912,39535284,	39429631,39430669,39431016,39433334,39433963,39436368,39436938,39437202,39438407,39442083,39443057,39446303,39448132,39449099,39451117,39459768,39462364,39463715,39483023,39535592,	0	Tbc1d8	cmpl	cmpl	0,1,1,1,0,0,0,2,1,0,1,0,0,0,2,1,0,1,1,0,
chr1	39813613	39814308	MACS_peak_58	110.08	NONE
chr1	40058170	40058655	MACS_peak_59	52.49	INTRAGENIC	NM_001252202	chr1	+	39957757	40083155	39958074	40081557	30	39957757,39958353,40019022,40030771,40033551,40037404,40039983,40040727,40042026,40043469,40045814,40046933,40053865,40056732,40057468,40058274,40061651,40063515,40064277,40066532,40067401,40070950,40071371,40073954,40076388,40077928,40079549,40080204,40081154,40081473,	39958131,39958419,40019079,40030897,40033662,40037495,40040114,40040782,40042105,40043645,40045887,40047144,40054027,40056819,40057594,40058436,40061758,40063667,40064375,40066708,40067522,40071068,40071542,40074098,40076523,40078029,40079699,40080364,40081294,40083155,	0	Map4k4	cmpl	cmpl	0,0,0,0,0,0,1,0,1,2,1,2,0,0,0,0,0,2,1,0,2,0,1,1,1,1,0,0,1,0,
chr1	40058170	40058655	MACS_peak_59	52.49	INTRAGENIC	NM_001252200	chr1	+	39957757	40083155	39958074	40081557	32	39957757,39958353,40019022,40030771,40033551,40037404,40039983,40040727,40042026,40043469,40045814,40046933,40053865,40056732,40057468,40058274,40060601,40061651,40063515,40064277,40065175,40066532,40067401,40070950,40071371,40073954,40076388,40077928,40079549,40080204,40081154,40081473,	39958131,39958419,40019079,40030897,40033662,40037495,40040114,40040782,40042105,40043645,40045887,40047144,40054027,40056819,40057594,40058436,40060832,40061758,40063667,40064375,40065184,40066708,40067522,40071068,40071542,40074098,40076523,40078029,40079699,40080364,40081294,40083155,	0	Map4k4	cmpl	cmpl	0,0,0,0,0,0,1,0,1,2,1,2,0,0,0,0,0,0,2,1,0,0,2,0,1,1,1,1,0,0,1,0,
chr1	40058170	40058655	MACS_peak_59	52.49	INTRAGENIC	NM_001252201	chr1	+	39957757	40083155	39958074	40081557	31	39957757,39958353,40019022,40030771,40033551,40037404,40039983,40040727,40042026,40043469,40045814,40046933,40053865,40056732,40057468,40061651,40063515,40064277,40065175,40066532,40067401,40068494,40070950,40071371,40073954,40076388,40077928,40079549,40080204,40081154,40081473,	39958131,39958419,40019079,40030897,40033662,40037495,40040114,40040782,40042105,40043645,40045887,40047144,40054027,40056819,40057594,40061758,40063667,40064375,40065184,40066708,40067522,40068686,40071068,40071542,40074098,40076523,40078029,40079699,40080364,40081294,40083155,	0	Map4k4	cmpl	cmpl	0,0,0,0,0,0,1,0,1,2,1,2,0,0,0,0,2,1,0,0,2,0,0,1,1,1,1,0,0,1,0,
chr1	40058170	40058655	MACS_peak_59	52.49	INTRAGENIC	NM_008696	chr1	+	39957757	40083155	39958074	40081557	31	39957757,39958353,40019022,40030771,40033551,40037404,40039983,40040727,40042026,40043469,40045814,40046933,40053865,40056732,40057468,40060601,40061651,40063515,40064277,40065175,40066532,40067401,40070950,40071371,40073954,40076388,40077928,40079549,40080204,40081154,40081473,	39958131,39958419,40019079,40030897,40033662,40037495,40040114,40040782,40042105,40043645,40045887,40047144,40054027,40056819,40057594,40060832,40061758,40063667,40064375,40065184,40066708,40067522,40071068,40071542,40074098,40076523,40078029,40079699,40080364,40081294,40083155,	0	Map4k4	cmpl	cmpl	0,0,0,0,0,0,1,0,1,2,1,2,0,0,0,0,0,2,1,0,0,2,0,1,1,1,1,0,0,1,0,
chr1	40059345	40059889	MACS_peak_60	54.7	INTRAGENIC	NM_001252202	chr1	+	39957757	40083155	39958074	40081557	30	39957757,39958353,40019022,40030771,40033551,40037404,40039983,40040727,40042026,40043469,40045814,40046933,40053865,40056732,40057468,40058274,40061651,40063515,40064277,40066532,40067401,40070950,40071371,40073954,40076388,40077928,40079549,40080204,40081154,40081473,	39958131,39958419,40019079,40030897,40033662,40037495,40040114,40040782,40042105,40043645,40045887,40047144,40054027,40056819,40057594,40058436,40061758,40063667,40064375,40066708,40067522,40071068,40071542,40074098,40076523,40078029,40079699,40080364,40081294,40083155,	0	Map4k4	cmpl	cmpl	0,0,0,0,0,0,1,0,1,2,1,2,0,0,0,0,0,2,1,0,2,0,1,1,1,1,0,0,1,0,
chr1	40059345	40059889	MACS_peak_60	54.7	INTRAGENIC	NM_001252200	chr1	+	39957757	40083155	39958074	40081557	32	39957757,39958353,40019022,40030771,40033551,40037404,40039983,40040727,40042026,40043469,40045814,40046933,40053865,40056732,40057468,40058274,40060601,40061651,40063515,40064277,40065175,40066532,40067401,40070950,40071371,40073954,40076388,40077928,40079549,40080204,40081154,40081473,	39958131,39958419,40019079,40030897,40033662,40037495,40040114,40040782,40042105,40043645,40045887,40047144,40054027,40056819,40057594,40058436,40060832,40061758,40063667,40064375,40065184,40066708,40067522,40071068,40071542,40074098,40076523,40078029,40079699,40080364,40081294,40083155,	0	Map4k4	cmpl	cmpl	0,0,0,0,0,0,1,0,1,2,1,2,0,0,0,0,0,0,2,1,0,0,2,0,1,1,1,1,0,0,1,0,
chr1	40059345	40059889	MACS_peak_60	54.7	INTRAGENIC	NM_001252201	chr1	+	39957757	40083155	39958074	40081557	31	39957757,39958353,40019022,40030771,40033551,40037404,40039983,40040727,40042026,40043469,40045814,40046933,40053865,40056732,40057468,40061651,40063515,40064277,40065175,40066532,40067401,40068494,40070950,40071371,40073954,40076388,40077928,40079549,40080204,40081154,40081473,	39958131,39958419,40019079,40030897,40033662,40037495,40040114,40040782,40042105,40043645,40045887,40047144,40054027,40056819,40057594,40061758,40063667,40064375,40065184,40066708,40067522,40068686,40071068,40071542,40074098,40076523,40078029,40079699,40080364,40081294,40083155,	0	Map4k4	cmpl	cmpl	0,0,0,0,0,0,1,0,1,2,1,2,0,0,0,0,2,1,0,0,2,0,0,1,1,1,1,0,0,1,0,
chr1	40059345	40059889	MACS_peak_60	54.7	INTRAGENIC	NM_008696	chr1	+	39957757	40083155	39958074	40081557	31	39957757,39958353,40019022,40030771,40033551,40037404,40039983,40040727,40042026,40043469,40045814,40046933,40053865,40056732,40057468,40060601,40061651,40063515,40064277,40065175,40066532,40067401,40070950,40071371,40073954,40076388,40077928,40079549,40080204,40081154,40081473,	39958131,39958419,40019079,40030897,40033662,40037495,40040114,40040782,40042105,40043645,40045887,40047144,40054027,40056819,40057594,40060832,40061758,40063667,40064375,40065184,40066708,40067522,40071068,40071542,40074098,40076523,40078029,40079699,40080364,40081294,40083155,	0	Map4k4	cmpl	cmpl	0,0,0,0,0,0,1,0,1,2,1,2,0,0,0,0,0,2,1,0,0,2,0,1,1,1,1,0,0,1,0,
chr1	40322791	40323371	MACS_peak_61	51.76	TSS	NM_008362	chr1	+	40281924	40373022	40282148	40370238	11	40281924,40339077,40349964,40350302,40351602,40354753,40357604,40359122,40367130,40369191,40369819,	40282151,40339141,40350202,40350492,40351771,40354819,40357722,40359274,40367274,40369359,40373022,	0	Il1r1	cmpl	cmpl	0,0,1,2,0,1,1,2,1,1,1,
chr1	40335783	40336189	MACS_peak_62	104.92	TSS	NM_008362	chr1	+	40281924	40373022	40282148	40370238	11	40281924,40339077,40349964,40350302,40351602,40354753,40357604,40359122,40367130,40369191,40369819,	40282151,40339141,40350202,40350492,40351771,40354819,40357722,40359274,40367274,40369359,40373022,	0	Il1r1	cmpl	cmpl	0,0,1,2,0,1,1,2,1,1,1,
chr1	41091619	41092377	MACS_peak_63	119.38	NONE
chr1	41744687	41745184	MACS_peak_64	51.44	NONE
chr1	42154685	42155319	MACS_peak_65	68.85	NONE
chr1	42861464	42862226	MACS_peak_66	94.72	NONE
chr1	43517895	43518547	MACS_peak_67	74.7	TSS	NM_010879	chr1	+	43502595	43627363	43590412	43626187	5	43502595,43566465,43590396,43610705,43625992,	43502872,43566628,43590638,43611427,43627363,	0	Nck2	cmpl	cmpl	-1,-1,0,1,0,
chr1	43623276	43623901	MACS_peak_68	62.3	INTRAGENIC	NM_010879	chr1	+	43502595	43627363	43590412	43626187	5	43502595,43566465,43590396,43610705,43625992,	43502872,43566628,43590638,43611427,43627363,	0	Nck2	cmpl	cmpl	-1,-1,0,1,0,
chr1	43652360	43652971	MACS_peak_69	56.31	DOWNSTREAM	NM_010879	chr1	+	43502595	43627363	43590412	43626187	5	43502595,43566465,43590396,43610705,43625992,	43502872,43566628,43590638,43611427,43627363,	0	Nck2	cmpl	cmpl	-1,-1,0,1,0,
chr1	43656228	43656681	MACS_peak_70	55.45	NONE
chr1	44158992	44159679	MACS_peak_71	86.67	DOWNSTREAM	NM_023645	chr1	-	44163390	44175618	44163931	44175344	10	44163390,44164609,44166838,44167579,44169489,44169847,44171285,44171538,44173882,44175162,	44163949,44164717,44166928,44167789,44169727,44170020,44171363,44171744,44174088,44175618,	0	Kdelc1	cmpl	cmpl	0,0,0,0,2,0,0,1,2,0,
chr1	44158992	44159679	MACS_peak_71	86.67	UPSTREAM	NM_144558	chr1	+	44176812	44201616	44183236	44199987	10	44176812,44183110,44184482,44185572,44186104,44186427,44193828,44195417,44198622,44199693,	44177119,44183711,44184609,44185668,44186209,44186522,44193961,44195504,44198719,44201616,	0	Bivm	cmpl	cmpl	-1,0,1,2,2,2,1,2,2,0,
chr1	44158992	44159679	MACS_peak_71	86.67	TSS	NM_029368	chr1	-	44143461	44159233	44143734	44156707	8	44143461,44144687,44145320,44148205,44156692,44158311,44158744,44159172,	44143908,44144893,44145372,44148436,44156846,44158367,44158802,44159233,	0	1700029F09Rik	cmpl	cmpl	0,1,0,0,0,-1,-1,-1,
chr1	44205289	44206024	MACS_peak_72	157.43	DOWNSTREAM	NM_144558	chr1	+	44176812	44201616	44183236	44199987	10	44176812,44183110,44184482,44185572,44186104,44186427,44193828,44195417,44198622,44199693,	44177119,44183711,44184609,44185668,44186209,44186522,44193961,44195504,44198719,44201616,	0	Bivm	cmpl	cmpl	-1,0,1,2,2,2,1,2,2,0,
chr1	44205289	44206024	MACS_peak_72	157.43	TSS	NM_011729	chr1	+	44204588	44238105	44204907	44237927	15	44204588,44213781,44214988,44215649,44217821,44218654,44220721,44223653,44230182,44230756,44231006,44232683,44235018,44235991,44237375,	44204995,44213957,44215104,44215736,44217882,44218798,44220929,44224727,44230424,44230876,44231220,44232828,44235219,44236076,44238105,	0	Ercc5	cmpl	cmpl	0,1,0,2,2,0,0,1,1,0,0,1,2,2,0,
chr1	45078759	45079615	MACS_peak_73	78.77	NONE
chr1	45729646	45730226	MACS_peak_74	98.57	NONE
chr1	46887708	46888205	MACS_peak_75	51.44	NONE
chr1	46932178	46932578	MACS_peak_76	69.34	NONE
chr1	46944609	46945378	MACS_peak_77	64.77	NONE
chr1	47151155	47151721	MACS_peak_78	83.48	NONE
chr1	49089331	49090013	MACS_peak_79	87.18	NONE
chr1	49590320	49590896	MACS_peak_80	52.08	NONE
chr1	50867817	50868491	MACS_peak_81	72.67	NONE
chr1	51250460	51251089	MACS_peak_82	54.89	DOWNSTREAM	NM_019790	chr1	+	50984366	51244114	50984791	51242325	10	50984366,50987392,50995056,51000040,51128311,51188986,51189902,51237095,51238580,51242228,	50984963,50987502,50995186,51000067,51128408,51189135,51189962,51237219,51238739,51244114,	0	Tmeff2	cmpl	cmpl	0,1,0,1,1,2,1,1,2,2,
chr1	51250460	51251089	MACS_peak_82	54.89	DOWNSTREAM	NR_045151	chr1	-	51275229	51390623	51390623	51390623	5	51275229,51308110,51316228,51384631,51390527,	51277284,51308331,51316274,51384765,51390623,	0	9330175M20Rik	unk	unk	-1,-1,-1,-1,-1,
chr1	51535140	51535644	MACS_peak_83	58.26	TSS	NM_028696	chr1	-	51526331	51535243	51528088	51534759	6	51526331,51529172,51529849,51531377,51534321,51534668,	51528255,51529224,51529925,51531449,51534460,51535243,	0	Obfc2a	cmpl	cmpl	1,0,2,2,1,0,
chr1	51566072	51566568	MACS_peak_84	51.53	NONE
chr1	51586816	51587295	MACS_peak_85	53.03	NONE
chr1	51734997	51736051	MACS_peak_86	202.53	NONE
chr1	52175969	52176553	MACS_peak_87	51.45	DOWNSTREAM	NM_011487	chr1	+	52065087	52164028	52068627	52163780	24	52065087,52068626,52070633,52122158,52125589,52128704,52131520,52133376,52135337,52136584,52139361,52139705,52139821,52140922,52153628,52155230,52157167,52158695,52158960,52159324,52159691,52162049,52162511,52163753,	52065572,52068755,52070778,52122257,52125682,52128783,52131606,52133528,52135496,52136677,52139421,52139723,52139915,52140967,52153712,52155329,52157303,52158745,52159055,52159461,52159883,52162116,52162620,52164028,	0	Stat4	cmpl	cmpl	-1,0,2,0,0,0,1,0,2,2,2,2,2,0,0,0,0,1,0,2,1,1,2,0,
chr1	52175969	52176553	MACS_peak_87	51.45	TSS	NM_009283	chr1	+	52176281	52218709	52179437	52216141	25	52176281,52176755,52179434,52179957,52183363,52189387,52192446,52193722,52194122,52196037,52197420,52199744,52200929,52201047,52201993,52204137,52204744,52205746,52207462,52208081,52209076,52210687,52211829,52212826,52216126,	52176467,52176916,52179565,52180102,52183462,52189477,52192525,52193814,52194274,52196196,52197513,52199804,52200959,52201141,52202035,52204221,52204843,52205882,52207512,52208176,52209222,52210873,52211905,52212926,52218709,	0	Stat1	cmpl	cmpl	-1,-1,0,2,0,0,0,1,0,2,2,2,2,2,0,0,0,0,1,0,2,1,1,2,0,
chr1	52314189	52314875	MACS_peak_88	79.07	NONE
chr1	52327656	52328069	MACS_peak_89	67.78	NONE
chr1	52338973	52339568	MACS_peak_90	57.62	NONE
chr1	52635190	52635717	MACS_peak_91	114.5	NONE
chr1	52687843	52688476	MACS_peak_92	61.63	TSS	NR_024590	chr1	+	52687548	52708763	52708763	52708763	9	52687548,52694208,52697672,52698014,52699162,52700011,52702104,52705593,52706549,	52687695,52694324,52697904,52698087,52699256,52700080,52702330,52705770,52708763,	0	Tmem194b	unk	unk	-1,-1,-1,-1,-1,-1,-1,-1,-1,
chr1	52691087	52691854	MACS_peak_93	86.58	TSS	NR_024590	chr1	+	52687548	52708763	52708763	52708763	9	52687548,52694208,52697672,52698014,52699162,52700011,52702104,52705593,52706549,	52687695,52694324,52697904,52698087,52699256,52700080,52702330,52705770,52708763,	0	Tmem194b	unk	unk	-1,-1,-1,-1,-1,-1,-1,-1,-1,
chr1	54175103	54175906	MACS_peak_94	83.29	TSS	NM_001001883	chr1	-	53863717	54251878	53870065	54097336	29	53863717,53883719,53884728,53887485,53888353,53889465,53895855,53897557,53908416,53910012,53921884,53925679,53942172,53944426,53947969,53961092,53970084,53970610,53971325,53980742,53982153,53983908,53987813,53989962,53993901,53999549,54007657,54097044,54251819,	53870177,53883832,53884814,53887600,53888500,53889595,53895954,53897710,53908530,53910133,53921994,53925763,53942269,53944529,53948104,53961278,53970209,53970714,53971476,53980838,53983527,53984009,53987953,53990132,53993977,53999644,54007765,54097371,54251878,	0	Hecw2	cmpl	cmpl	2,0,1,0,0,2,2,2,2,1,2,2,1,0,0,0,1,2,1,1,1,2,0,1,0,1,1,0,-1,
chr1	54641260	54641958	MACS_peak_95	93.42	NONE
chr1	54969240	54969837	MACS_peak_96	57.46	TSS	NM_001081433	chr1	-	54702183	54983231	54705120	54983010	28	54702183,54708512,54710586,54711923,54712504,54714459,54715762,54717844,54719497,54720742,54724215,54737963,54779857,54784333,54786577,54789771,54791839,54793073,54800157,54809733,54819104,54820488,54823193,54823627,54835130,54849296,54885455,54982983,	54705179,54708604,54710669,54712006,54712650,54714543,54715850,54718061,54719615,54720830,54724417,54738035,54779969,54784414,54786718,54789840,54791903,54793156,54800272,54809812,54819317,54820631,54823281,54823828,54835201,54849375,54885539,54983231,	0	Ankrd44	cmpl	cmpl	1,2,0,1,2,2,1,0,2,1,0,0,2,2,2,2,1,2,1,0,0,1,0,0,1,0,0,0,
chr1	55252871	55253711	MACS_peak_97	118.29	NONE
chr1	55290322	55290754	MACS_peak_98	57.52	TSS	NM_175439	chr1	+	55294020	55296902	55294083	55295844	1	55294020,	55296902,	0	Mars2	cmpl	cmpl	0,
chr1	55293272	55293814	MACS_peak_99	62.29	TSS	NM_175439	chr1	+	55294020	55296902	55294083	55295844	1	55294020,	55296902,	0	Mars2	cmpl	cmpl	0,
chr1	55324654	55325184	MACS_peak_100	55.91	NONE
chr1	55954186	55955145	MACS_peak_101	106.25	NONE
chr1	56240111	56240725	MACS_peak_102	56.07	NONE
chr1	57008360	57008768	MACS_peak_103	60.05	UPSTREAM	NR_024326	chr1	+	57028312	57032040	57032040	57032040	2	57028312,57031101,	57028615,57032040,	0	9130024F11Rik	unk	unk	-1,-1,
chr1	57008360	57008768	MACS_peak_103	60.05	UPSTREAM	NR_024325	chr1	+	57028312	57032040	57032040	57032040	1	57028312,	57032040,	0	9130024F11Rik	unk	unk	-1,
chr1	57132777	57133439	MACS_peak_104	66.39	NONE
chr1	57830737	57831327	MACS_peak_105	58.04	TSS	NM_144882	chr1	+	57831704	58005241	57888943	58003307	14	57831704,57856148,57888896,57912307,57936351,57939549,57942546,57957477,57958932,57980209,57994755,57997216,57999864,58002911,	57831868,57856198,57888981,57912368,57936460,57939599,57942793,57957684,57959068,57980268,57994865,57997319,58000085,58005241,	0	Spats2l	cmpl	cmpl	-1,-1,0,2,0,1,0,1,1,2,1,0,1,0,
chr1	58005112	58005605	MACS_peak_106	51.79	DOWNSTREAM	NR_027630	chr1	-	58011944	58026368	58026368	58026368	7	58011944,58015986,58018744,58019911,58022194,58024340,58026250,	58013664,58016089,58018839,58020105,58022384,58024567,58026368,	0	Kctd18	unk	unk	-1,-1,-1,-1,-1,-1,-1,
chr1	58005112	58005605	MACS_peak_106	51.79	DOWNSTREAM	NM_001159864	chr1	-	58011944	58026928	58013171	58024533	7	58011944,58015986,58018744,58019911,58022172,58024340,58026864,	58013664,58016089,58018839,58020105,58022384,58024567,58026928,	0	Kctd18	cmpl	cmpl	2,1,2,0,1,0,-1,
chr1	58005112	58005605	MACS_peak_106	51.79	DOWNSTREAM	NM_001159865	chr1	-	58011944	58026928	58013171	58024533	4	58011944,58015986,58024340,58026864,	58013664,58016089,58024567,58026928,	0	Kctd18	cmpl	cmpl	2,1,0,-1,
chr1	58005112	58005605	MACS_peak_106	51.79	INTRAGENIC	NM_001164566	chr1	+	57902414	58005241	57912329	58003307	12	57902414,57912307,57936351,57939549,57942546,57957477,57958932,57980209,57994755,57997216,57999864,58002914,	57902527,57912368,57936460,57939599,57942793,57957684,57959068,57980268,57994865,57997319,58000085,58005241,	0	Spats2l	cmpl	cmpl	-1,0,0,1,0,1,1,2,1,0,1,0,
chr1	58005112	58005605	MACS_peak_106	51.79	INTRAGENIC	NM_144882	chr1	+	57831704	58005241	57888943	58003307	14	57831704,57856148,57888896,57912307,57936351,57939549,57942546,57957477,57958932,57980209,57994755,57997216,57999864,58002911,	57831868,57856198,57888981,57912368,57936460,57939599,57942793,57957684,57959068,57980268,57994865,57997319,58000085,58005241,	0	Spats2l	cmpl	cmpl	-1,-1,0,2,0,1,0,1,1,2,1,0,1,0,
chr1	58563127	58563532	MACS_peak_107	60.38	TSS	NM_001025378	chr1	-	58521047	58558260	58521047	58558260	15	58521047,58522838,58524494,58526511,58527783,58529148,58531652,58533277,58537094,58537803,58540486,58549700,58550504,58554219,58558166,	58521134,58522957,58524556,58526683,58527930,58529245,58531785,58533387,58537193,58537997,58540547,58549732,58550594,58554309,58558260,	0	Orc2	cmpl	cmpl	0,1,2,1,1,0,2,0,0,1,0,1,1,1,0,
chr1	59492153	59492769	MACS_peak_108	70.51	NONE
chr1	59572922	59573562	MACS_peak_109	54.04	TSS	NM_001013771	chr1	+	59573107	59691353	59573275	59691106	20	59573107,59583554,59598157,59601417,59606755,59607977,59609263,59612999,59614929,59619486,59623437,59639239,59664576,59681930,59684300,59685013,59686838,59689057,59689990,59690837,	59573362,59583821,59598317,59601573,59606883,59608140,59609406,59613168,59615070,59619654,59623548,59639319,59664649,59682021,59684451,59685128,59687170,59689260,59690163,59691353,	0	Gm973	cmpl	cmpl	0,0,0,1,1,0,1,0,1,1,1,1,0,1,2,0,1,0,2,1,
chr1	59623236	59624144	MACS_peak_110	88.71	INTRAGENIC	NM_001013771	chr1	+	59573107	59691353	59573275	59691106	20	59573107,59583554,59598157,59601417,59606755,59607977,59609263,59612999,59614929,59619486,59623437,59639239,59664576,59681930,59684300,59685013,59686838,59689057,59689990,59690837,	59573362,59583821,59598317,59601573,59606883,59608140,59609406,59613168,59615070,59619654,59623548,59639319,59664649,59682021,59684451,59685128,59687170,59689260,59690163,59691353,	0	Gm973	cmpl	cmpl	0,0,0,1,1,0,1,0,1,1,1,1,0,1,2,0,1,0,2,1,
chr1	60410025	60410614	MACS_peak_111	65.48	INTRAGENIC	NM_030013	chr1	+	60400215	60444231	60400229	60444133	13	60400215,60408964,60409752,60411357,60420033,60423492,60428064,60429433,60432910,60436217,60439247,60443748,60443982,	60400301,60409014,60409919,60411500,60420201,60423571,60428180,60429488,60433031,60436329,60439312,60443838,60444231,	0	Cyp20a1	cmpl	cmpl	0,0,2,1,0,0,1,0,1,2,0,2,2,
chr1	60410025	60410614	MACS_peak_111	65.48	DOWNSTREAM	NM_173444	chr1	+	60237442	60391549	60238547	60387836	55	60237442,60238306,60251347,60251858,60256948,60257707,60263177,60274039,60278910,60281468,60287445,60291640,60291824,60293214,60293940,60295415,60299382,60301637,60304459,60305206,60307878,60308147,60310195,60311737,60314273,60315493,60317076,60318253,60321122,60321725,60324602,60325226,60327115,60328976,60333968,60334756,60335510,60336542,60338090,60338668,60340826,60344154,60346758,60348677,603…	60237529,60238598,60251439,60252020,60257030,60257835,60263260,60274125,60279217,60281575,60287529,60291739,60292405,60293347,60294060,60295719,60299468,60301727,60304628,60305340,60308038,60308250,60310352,60311896,60314433,60315582,60317637,60318429,60321276,60321854,60324908,60325376,60327273,60329101,60334095,60334905,60335644,60336644,60338186,60338793,60340967,60344285,60346868,60348795,603…	0	Nbeal1	cmpl	cmpl	-1,0,0,2,2,0,2,1,0,1,0,0,0,2,0,0,1,0,0,1,0,1,2,0,0,1,0,0,2,0,0,0,0,2,1,2,1,0,0,0,2,2,1,0,1,0,0,0,2,1,0,0,0,2,0,
chr1	60623459	60624191	MACS_peak_112	67.7	TSS	NM_001045513	chr1	-	60540028	60623609	60545143	60590250	14	60540028,60550381,60552258,60553068,60555267,60556323,60557398,60558599,60559668,60560361,60582435,60584227,60590130,60623408,	60547165,60550524,60552379,60553167,60555378,60556467,60557464,60558721,60559828,60560439,60582944,60584333,60590250,60623609,	0	Raph1	cmpl	cmpl	0,1,0,0,0,0,0,1,0,0,1,0,0,-1,
chr1	60753054	60753664	MACS_peak_113	78.81	NONE
chr1	61007424	61008088	MACS_peak_114	52.26	NONE
chr1	61111751	61112421	MACS_peak_115	80.61	NONE
chr1	61905770	61906354	MACS_peak_116	58.55	INTRAGENIC	NM_001081050	chr1	+	61685397	62688858	61685816	62684497	23	61685397,61814521,62056880,62122958,62191420,62200506,62206008,62207683,62210653,62212927,62245150,62258107,62262996,62276752,62285410,62322456,62390507,62391443,62486584,62526072,62579218,62634310,62684139,	61685936,61814623,62057052,62123068,62191509,62200593,62206134,62208042,62210793,62213056,62245336,62258278,62263129,62276852,62285526,62322501,62390714,62391681,62486695,62526369,62579354,62634390,62688858,	0	Pard3b	cmpl	cmpl	0,0,0,1,0,2,2,2,1,0,0,0,0,1,2,1,1,1,2,2,2,0,2,
chr1	63224708	63225273	MACS_peak_117	52.96	DOWNSTREAM	NR_045914	chr1	+	63161313	63204869	63204869	63204869	4	63161313,63190692,63202793,63203531,	63161534,63190759,63202895,63204869,	0	Gm11602	unk	unk	-1,-1,-1,-1,
chr1	63224708	63225273	MACS_peak_117	52.96	INTRAGENIC	NM_018796	chr1	+	63223404	63227060	63223785	63226186	6	63223404,63224327,63225012,63225405,63225821,63226031,	63223865,63224450,63225139,63225472,63225947,63227060,	0	Eef1b2	cmpl	cmpl	0,2,2,0,1,1,
chr1	63224708	63225273	MACS_peak_117	52.96	TSS	NM_145518	chr1	-	63190165	63223396	63190404	63217483	19	63190165,63193693,63193863,63194969,63196530,63198124,63199348,63202777,63203705,63206323,63207453,63210240,63211303,63211522,63212864,63215802,63216623,63217422,63223159,	63190496,63193766,63193998,63195145,63196685,63198285,63199478,63202906,63203851,63206438,63207588,63210426,63211434,63211604,63212941,63215910,63216715,63217488,63223396,	0	Ndufs1	cmpl	cmpl	1,0,0,1,2,0,2,2,0,2,2,2,0,2,0,0,1,0,-1,
chr1	63241568	63241917	MACS_peak_118	88.82	DOWNSTREAM	NM_018796	chr1	+	63223404	63227060	63223785	63226186	6	63223404,63224327,63225012,63225405,63225821,63226031,	63223865,63224450,63225139,63225472,63225947,63227060,	0	Eef1b2	cmpl	cmpl	0,2,2,0,1,1,
chr1	63241568	63241917	MACS_peak_118	88.82	DOWNSTREAM	NR_028558	chr1	+	63225596	63225709	63225709	63225709	1	63225596,	63225709,	0	Snora41	unk	unk	-1,
chr1	63674748	63675303	MACS_peak_119	119.59	NONE
chr1	64480334	64480949	MACS_peak_120	55.99	NONE
chr1	64641831	64642330	MACS_peak_121	58.73	INTRAGENIC	NM_133828	chr1	+	64579377	64651122	64597430	64643952	8	64579377,64597422,64605076,64612790,64616707,64620646,64622752,64643807,	64579594,64597544,64605223,64612891,64616850,64620829,64622903,64651122,	0	Creb1	cmpl	cmpl	-1,0,0,0,2,1,1,2,
chr1	64641831	64642330	MACS_peak_121	58.73	INTRAGENIC	NM_009952	chr1	+	64579377	64651122	64597430	64643952	9	64579377,64597422,64605076,64606300,64612790,64616707,64620646,64622752,64643807,	64579594,64597544,64605223,64606342,64612891,64616850,64620829,64622903,64651122,	0	Creb1	cmpl	cmpl	-1,0,0,0,0,2,1,1,2,
chr1	64641831	64642330	MACS_peak_121	58.73	DOWNSTREAM	NM_025964	chr1	-	64653053	64663742	64654313	64662993	3	64653053,64661671,64662846,	64654711,64661783,64663742,	0	Mettl21a	cmpl	cmpl	1,0,0,
chr1	64641831	64642330	MACS_peak_121	58.73	INTRAGENIC	NM_001037726	chr1	+	64579377	64651122	64605082	64643952	7	64579377,64605076,64612790,64616707,64620646,64622752,64643807,	64579594,64605223,64612891,64616850,64620829,64622903,64651122,	0	Creb1	cmpl	cmpl	-1,0,0,2,1,1,2,
chr1	64663535	64664146	MACS_peak_122	63.51	DOWNSTREAM	NM_133828	chr1	+	64579377	64651122	64597430	64643952	8	64579377,64597422,64605076,64612790,64616707,64620646,64622752,64643807,	64579594,64597544,64605223,64612891,64616850,64620829,64622903,64651122,	0	Creb1	cmpl	cmpl	-1,0,0,0,2,1,1,2,
chr1	64663535	64664146	MACS_peak_122	63.51	DOWNSTREAM	NM_009952	chr1	+	64579377	64651122	64597430	64643952	9	64579377,64597422,64605076,64606300,64612790,64616707,64620646,64622752,64643807,	64579594,64597544,64605223,64606342,64612891,64616850,64620829,64622903,64651122,	0	Creb1	cmpl	cmpl	-1,0,0,0,0,2,1,1,2,
chr1	64663535	64664146	MACS_peak_122	63.51	TSS	NM_025964	chr1	-	64653053	64663742	64654313	64662993	3	64653053,64661671,64662846,	64654711,64661783,64663742,	0	Mettl21a	cmpl	cmpl	1,0,0,
chr1	65156413	65157036	MACS_peak_123	69.86	NONE
chr1	65232252	65232718	MACS_peak_124	54.22	TSS	NM_011086	chr1	+	65233258	65325270	65236901	65320332	42	65233258,65236892,65238718,65239107,65242229,65243185,65249289,65252162,65262507,65266327,65268843,65270078,65277367,65280303,65280827,65281583,65285008,65290969,65292283,65292635,65296759,65298178,65298985,65299925,65301615,65302095,65302512,65303121,65304482,65305356,65306572,65309453,65310920,65311822,65312335,65314399,65315271,65316446,65317841,65319020,65319606,65320216,	65233407,65237073,65238868,65239140,65242348,65243357,65249497,65252252,65262646,65266485,65268955,65270226,65277427,65280433,65281008,65281658,65285116,65291110,65292410,65293792,65296860,65298250,65299157,65300104,65301729,65302204,65302667,65303212,65304543,65305494,65306693,65309549,65311004,65311920,65312500,65314459,65315448,65316550,65317970,65319282,65319681,65325270,	0	Pikfyve	cmpl	cmpl	-1,0,1,1,1,0,1,2,2,0,2,0,1,1,2,0,0,0,0,1,0,2,2,0,2,2,0,2,0,1,1,2,2,2,1,1,1,1,0,0,1,1,
chr1	65232887	65233431	MACS_peak_125	54.7	TSS	NM_011086	chr1	+	65233258	65325270	65236901	65320332	42	65233258,65236892,65238718,65239107,65242229,65243185,65249289,65252162,65262507,65266327,65268843,65270078,65277367,65280303,65280827,65281583,65285008,65290969,65292283,65292635,65296759,65298178,65298985,65299925,65301615,65302095,65302512,65303121,65304482,65305356,65306572,65309453,65310920,65311822,65312335,65314399,65315271,65316446,65317841,65319020,65319606,65320216,	65233407,65237073,65238868,65239140,65242348,65243357,65249497,65252252,65262646,65266485,65268955,65270226,65277427,65280433,65281008,65281658,65285116,65291110,65292410,65293792,65296860,65298250,65299157,65300104,65301729,65302204,65302667,65303212,65304543,65305494,65306693,65309549,65311004,65311920,65312500,65314459,65315448,65316550,65317970,65319282,65319681,65325270,	0	Pikfyve	cmpl	cmpl	-1,0,1,1,1,0,1,2,2,0,2,0,1,1,2,0,0,0,0,1,0,2,2,0,2,2,0,2,0,1,1,2,2,2,1,1,1,1,0,0,1,1,
chr1	66448271	66448881	MACS_peak_126	56.39	INTRAGENIC	NM_008632	chr1	+	66221902	66489157	66427085	66485581	14	66221902,66239692,66298235,66368977,66408776,66427062,66445962,66448017,66466708,66468219,66471770,66480087,66484827,66485365,	66222069,66239755,66298286,66369042,66408854,66427347,66446076,66448095,66466770,66468364,66472102,66480169,66484940,66489157,	0	Mtap2	cmpl	cmpl	-1,-1,-1,-1,-1,0,1,1,1,0,1,0,1,0,
chr1	66448271	66448881	MACS_peak_126	56.39	INTRAGENIC	NM_001039934	chr1	+	66221902	66489157	66427085	66485581	15	66221902,66239692,66298235,66368977,66408776,66427062,66445962,66448017,66466708,66468219,66471770,66478100,66480087,66484827,66485365,	66222069,66239755,66298286,66369042,66408854,66427347,66446076,66448095,66466770,66468364,66472102,66478193,66480169,66484940,66489157,	0	Mtap2	cmpl	cmpl	-1,-1,-1,-1,-1,0,1,1,1,0,1,0,0,1,0,
chr1	66835119	66835566	MACS_peak_127	56.03	NONE
chr1	67091290	67091888	MACS_peak_128	57.37	NONE
chr1	68007812	68008439	MACS_peak_129	62.13	NONE
chr1	68162200	68162639	MACS_peak_130	56.82	NONE
chr1	69044372	69044845	MACS_peak_131	61.26	TSS	NM_010154	chr1	-	68086539	69154633	68086614	69154330	27	68086539,68089014,68118091,68119671,68121991,68125109,68127213,68245415,68297153,68301102,68305754,68336816,68344860,68352418,68356168,68374641,68376765,68377793,68385930,68390413,68393119,68395874,68417028,68442754,68607069,68786955,69154248,	68087060,68089312,68118262,68119769,68122138,68125185,68127369,68245601,68297252,68301225,68305887,68336891,68345015,68352512,68356301,68374841,68376856,68377867,68386057,68390527,68393261,68395993,68417094,68442889,68607256,68787107,69154633,	0	Erbb4	cmpl	cmpl	1,0,0,1,1,0,0,0,0,0,2,2,0,2,1,2,1,2,1,1,0,1,1,1,0,1,0,
chr1	69397034	69397556	MACS_peak_132	56.62	NONE
chr1	69524072	69524751	MACS_peak_133	51.19	NONE
chr1	69624959	69625524	MACS_peak_134	60.2	NONE
chr1	69684814	69685385	MACS_peak_135	52.48	NONE
chr1	71444205	71444781	MACS_peak_136	74.41	NONE
chr1	71447401	71448307	MACS_peak_137	55.29	TSS	NM_175210	chr1	-	71289663	71461484	71289870	71461156	53	71289663,71291305,71293705,71294918,71296428,71304664,71305931,71306362,71307354,71309985,71311297,71312435,71314002,71314755,71318937,71320986,71322644,71325385,71325948,71326914,71329375,71330518,71332151,71333032,71335111,71337905,71338987,71339954,71340174,71341300,71347493,71349204,71350039,71353609,71356341,71359134,71360532,71361051,71363673,71366446,71367973,71368168,71375737,71376820,713…	71289978,71291443,71293811,71295011,71296532,71304799,71306073,71306472,71307559,71310239,71311457,71312551,71314180,71314810,71319043,71321074,71322772,71325479,71326035,71327167,71329526,71330755,71332312,71333229,71335330,71338092,71339143,71340089,71340244,71341630,71347608,71349520,71350219,71353700,71356461,71359274,71360743,71361216,71363847,71366568,71368086,71368425,71375844,71376939,713…	0	Abca12	cmpl	cmpl	0,0,2,2,0,0,2,0,2,0,2,0,2,1,0,2,0,2,2,1,0,0,1,2,2,1,1,1,0,0,2,1,1,0,0,1,0,0,0,1,2,0,1,2,1,2,0,0,1,2,1,0,0,
chr1	71460539	71461038	MACS_peak_138	128.19	TSS	NM_175210	chr1	-	71289663	71461484	71289870	71461156	53	71289663,71291305,71293705,71294918,71296428,71304664,71305931,71306362,71307354,71309985,71311297,71312435,71314002,71314755,71318937,71320986,71322644,71325385,71325948,71326914,71329375,71330518,71332151,71333032,71335111,71337905,71338987,71339954,71340174,71341300,71347493,71349204,71350039,71353609,71356341,71359134,71360532,71361051,71363673,71366446,71367973,71368168,71375737,71376820,713…	71289978,71291443,71293811,71295011,71296532,71304799,71306073,71306472,71307559,71310239,71311457,71312551,71314180,71314810,71319043,71321074,71322772,71325479,71326035,71327167,71329526,71330755,71332312,71333229,71335330,71338092,71339143,71340089,71340244,71341630,71347608,71349520,71350219,71353700,71356461,71359274,71360743,71361216,71363847,71366568,71368086,71368425,71375844,71376939,713…	0	Abca12	cmpl	cmpl	0,0,2,2,0,0,2,0,2,0,2,0,2,1,0,2,0,2,2,1,0,0,1,2,2,1,1,1,0,0,2,1,1,0,0,1,0,0,0,1,2,0,1,2,1,2,0,0,1,2,1,0,0,
chr1	71525189	71525657	MACS_peak_139	61.76	NONE
chr1	71867178	71867820	MACS_peak_140	53.89	NONE
chr1	72146030	72146487	MACS_peak_141	55.06	NONE
chr1	72249748	72250173	MACS_peak_142	58.24	TSS	NM_001005423	chr1	-	72205806	72258881	72207458	72258685	5	72205806,72208895,72210645,72238616,72258590,	72207593,72209059,72210736,72238776,72258881,	0	Mreg	cmpl	cmpl	0,1,0,2,0,
chr1	72272855	72273625	MACS_peak_143	57.95	NONE
chr1	72330642	72331243	MACS_peak_144	57.13	TSS	NM_023523	chr1	-	72305746	72330888	72305921	72330790	8	72305746,72308525,72313980,72316850,72321459,72322739,72323860,72330666,	72306007,72308637,72314091,72316947,72321541,72322905,72323994,72330888,	0	Pecr	cmpl	cmpl	1,0,0,2,1,0,1,0,
chr1	72426241	72426878	MACS_peak_145	100.18	INTRAGENIC	NM_009533	chr1	+	72353994	72441527	72354120	72441296	21	72353994,72357008,72358981,72360727,72362032,72365572,72371647,72372789,72376499,72381209,72385533,72386562,72389582,72392801,72400816,72403390,72428192,72429931,72430275,72440469,72441281,	72354141,72357122,72359165,72360776,72362155,72365764,72371762,72372928,72376612,72381272,72385671,72386653,72389716,72392998,72400910,72403460,72428302,72430028,72430343,72440541,72441527,	0	Xrcc5	cmpl	cmpl	0,0,0,1,2,2,2,0,1,0,0,0,1,0,2,0,1,0,1,0,0,
chr1	72436994	72437640	MACS_peak_146	53.59	INTRAGENIC	NM_009533	chr1	+	72353994	72441527	72354120	72441296	21	72353994,72357008,72358981,72360727,72362032,72365572,72371647,72372789,72376499,72381209,72385533,72386562,72389582,72392801,72400816,72403390,72428192,72429931,72430275,72440469,72441281,	72354141,72357122,72359165,72360776,72362155,72365764,72371762,72372928,72376612,72381272,72385671,72386653,72389716,72392998,72400910,72403460,72428302,72430028,72430343,72440541,72441527,	0	Xrcc5	cmpl	cmpl	0,0,0,1,2,2,2,0,1,0,0,0,1,0,2,0,1,0,1,0,0,
chr1	72772624	72773087	MACS_peak_147	70.36	DOWNSTREAM	NM_009084	chr1	+	72757833	72760387	72757894	72760139	4	72757833,72758245,72758715,72760075,	72757897,72758374,72758798,72760387,	0	Rpl37a	cmpl	cmpl	0,0,0,2,
chr1	72779425	72780403	MACS_peak_148	405.72	DOWNSTREAM	NM_009084	chr1	+	72757833	72760387	72757894	72760139	4	72757833,72758245,72758715,72760075,	72757897,72758374,72758798,72760387,	0	Rpl37a	cmpl	cmpl	0,0,0,2,
chr1	72825203	72826198	MACS_peak_149	133.66	NONE
chr1	72901597	72902154	MACS_peak_150	53.61	DOWNSTREAM	NM_010518	chr1	-	72904638	72921439	72908950	72920713	4	72904638,72909716,72910424,72920379,	72909082,72909836,72910654,72921439,	0	Igfbp5	cmpl	cmpl	0,0,1,0,
chr1	72901597	72902154	MACS_peak_150	53.61	DOWNSTREAM	NM_008342	chr1	+	72871053	72899045	72871153	72898736	4	72871053,72895659,72896137,72898571,	72871538,72895886,72896278,72899045,	0	Igfbp2	cmpl	cmpl	0,1,0,0,
chr1	72934172	72935173	MACS_peak_151	109.83	NONE
chr1	73009435	73010008	MACS_peak_152	52.32	NONE
chr1	73163411	73164002	MACS_peak_153	57.96	NONE
chr1	73325677	73326557	MACS_peak_154	121.99	NONE
chr1	73353699	73354201	MACS_peak_155	326.02	NONE
chr1	73358952	73359635	MACS_peak_156	103.16	NONE
chr1	73408612	73409203	MACS_peak_157	97.23	NONE
chr1	73562297	73562889	MACS_peak_158	57.87	NONE
chr1	73585146	73585589	MACS_peak_159	81.24	NONE
chr1	73659885	73660330	MACS_peak_160	56.22	DOWNSTREAM	NR_045311	chr1	-	73664954	73911040	73911040	73911040	9	73664954,73666769,73719569,73904638,73905137,73906190,73907542,73909232,73910948,	73665240,73666998,73719640,73904671,73905434,73906441,73907626,73909690,73911040,	0	6030407O03Rik	unk	unk	-1,-1,-1,-1,-1,-1,-1,-1,-1,
chr1	73818299	73818869	MACS_peak_161	52.56	NONE
chr1	73872141	73872781	MACS_peak_162	61.04	NONE
chr1	73876705	73877526	MACS_peak_163	74.57	NONE
chr1	73909081	73909715	MACS_peak_164	61.54	TSS	NR_045311	chr1	-	73664954	73911040	73911040	73911040	9	73664954,73666769,73719569,73904638,73905137,73906190,73907542,73909232,73910948,	73665240,73666998,73719640,73904671,73905434,73906441,73907626,73909690,73911040,	0	6030407O03Rik	unk	unk	-1,-1,-1,-1,-1,-1,-1,-1,-1,
chr1	74071290	74071882	MACS_peak_165	97.11	NONE
chr1	74284562	74285381	MACS_peak_166	61.08	TSS	NM_029711	chr1	+	74283123	74314787	74283399	74314369	10	74283123,74292653,74294705,74297827,74301401,74302531,74309032,74310316,74310926,74314344,	74283473,74292688,74294818,74297873,74301588,74302625,74309159,74310417,74311027,74314787,	0	Arpc2	cmpl	cmpl	0,2,1,0,1,2,0,1,0,2,
chr1	74331119	74331683	MACS_peak_167	53.04	DOWNSTREAM	NM_027154	chr1	-	74334820	74350910	74335945	74341973	12	74334820,74336444,74337325,74337773,74338004,74338268,74339030,74339408,74339578,74340481,74341771,74350696,	74336092,74336498,74337421,74337861,74338042,74338308,74339081,74339462,74339643,74340576,74342013,74350910,	0	Tmbim1	cmpl	cmpl	0,0,0,2,0,2,2,2,0,1,0,-1,
chr1	74331119	74331683	MACS_peak_167	53.04	DOWNSTREAM	NM_029711	chr1	+	74283123	74314787	74283399	74314369	10	74283123,74292653,74294705,74297827,74301401,74302531,74309032,74310316,74310926,74314344,	74283473,74292688,74294818,74297873,74301588,74302625,74309159,74310417,74311027,74314787,	0	Arpc2	cmpl	cmpl	0,2,1,0,1,2,0,1,0,2,
chr1	74331119	74331683	MACS_peak_167	53.04	TSS	NM_025580	chr1	+	74331607	74334027	74331644	74333858	3	74331607,74332415,74333665,	74331711,74332584,74334027,	0	Pnkd	cmpl	cmpl	0,1,2,
chr1	74433318	74434007	MACS_peak_168	71.34	UPSTREAM	NR_029743	chr1	+	74440883	74440968	74440968	74440968	1	74440883,	74440968,	0	Mir26b	unk	unk	-1,
chr1	74433318	74434007	MACS_peak_168	71.34	TSS	NM_153088	chr1	+	74438182	74443859	74438471	74442158	7	74438182,74439851,74440370,74440592,74441213,74441410,74442029,	74438538,74440000,74440475,74440649,74441306,74441596,74443859,	0	Ctdsp1	cmpl	cmpl	0,1,0,0,0,0,0,
chr1	74443804	74444358	MACS_peak_169	53.86	DOWNSTREAM	NR_029743	chr1	+	74440883	74440968	74440968	74440968	1	74440883,	74440968,	0	Mir26b	unk	unk	-1,
chr1	74443804	74444358	MACS_peak_169	53.86	INTRAGENIC	NM_153088	chr1	+	74438182	74443859	74438471	74442158	7	74438182,74439851,74440370,74440592,74441213,74441410,74442029,	74438538,74440000,74440475,74440649,74441306,74441596,74443859,	0	Ctdsp1	cmpl	cmpl	0,1,0,0,0,0,0,
chr1	74443804	74444358	MACS_peak_169	53.86	UPSTREAM	NM_009509	chr1	+	74455957	74482134	74461653	74481565	20	74455957,74461642,74462539,74464933,74466142,74466368,74467826,74468134,74468352,74469500,74470248,74470436,74472110,74473125,74473813,74474052,74474640,74477190,74478864,74481451,	74456010,74461728,74462614,74465130,74466251,74466479,74468029,74468213,74468451,74469654,74470349,74470574,74472269,74473305,74473959,74474197,74474829,74477259,74479005,74482134,	0	Vil1	cmpl	cmpl	-1,0,0,0,2,0,0,2,0,0,1,0,0,0,0,2,0,0,0,0,
chr1	74443804	74444358	MACS_peak_169	53.86	DOWNSTREAM	NM_013612	chr1	+	74421776	74432625	74421888	74432080	15	74421776,74422291,74423366,74423730,74426356,74426770,74427182,74427415,74428309,74430011,74430198,74430597,74431270,74431714,74431966,	74421895,74422425,74423489,74423850,74426463,74426841,74427250,74427571,74428468,74430101,74430318,74430747,74431344,74431868,74432625,	0	Slc11a1	cmpl	cmpl	0,1,0,0,0,2,1,0,0,0,0,0,0,2,0,
chr1	74826983	74827829	MACS_peak_170	94.25	UPSTREAM	NM_009518	chr1	+	74838592	74850749	74838744	74850194	4	74838592,74839936,74847106,74849696,	74838857,74840199,74847486,74850749,	0	Wnt10a	cmpl	cmpl	0,2,1,0,
chr1	74826983	74827829	MACS_peak_170	94.25	TSS	NM_009526	chr1	+	74818465	74831893	74818719	74831174	4	74818465,74828675,74829133,74830712,	74818796,74828896,74829468,74831893,	0	Wnt6	cmpl	cmpl	0,2,1,0,
chr1	75491575	75492209	MACS_peak_171	163.7	DOWNSTREAM	NM_177056	chr1	+	75476106	75482268	75476806	75481559	5	75476106,75476767,75479143,75480949,75481421,	75476460,75476972,75479719,75481152,75482268,	0	Tmem198	cmpl	cmpl	-1,0,1,1,0,
chr1	75491575	75492209	MACS_peak_171	163.7	UPSTREAM	NM_010564	chr1	+	75503651	75506929	75503822	75506738	2	75503651,75505908,	75504093,75506929,	0	Inha	cmpl	cmpl	0,1,
chr1	75491575	75492209	MACS_peak_171	163.7	DOWNSTREAM	NM_183022	chr1	+	75447084	75470915	75447406	75470207	10	75447084,75465685,75465931,75466245,75466853,75468858,75469396,75469566,75469817,75470093,	75447988,75465830,75466059,75466408,75466910,75469012,75469488,75469646,75469922,75470915,	0	Accn4	cmpl	cmpl	0,0,1,0,1,1,2,1,0,0,
chr1	75584488	75585208	MACS_peak_172	54.9	NONE
chr1	75609603	75610505	MACS_peak_173	75.12	NONE
chr1	75650195	75650823	MACS_peak_174	54.97	NONE
chr1	75664540	75665195	MACS_peak_175	169.86	NONE
chr1	76050300	76051029	MACS_peak_176	60.97	NONE
chr1	76126094	76126550	MACS_peak_177	55.16	NONE
chr1	76163818	76164738	MACS_peak_178	142.04	NONE
chr1	76713753	76714217	MACS_peak_179	87.28	NONE
chr1	77077334	77077910	MACS_peak_180	387.98	NONE
chr1	77183813	77184333	MACS_peak_181	80.44	NONE
chr1	77467268	77467948	MACS_peak_182	165.8	NONE
chr1	77735580	77736183	MACS_peak_183	56.96	NONE
chr1	78640629	78641418	MACS_peak_184	255.2	UPSTREAM	NM_001033606	chr1	+	78654399	78704318	78678207	78702990	15	78654399,78678167,78684811,78686843,78688656,78690770,78692655,78693003,78693464,78695570,78696330,78697843,78700060,78701808,78702832,	78654678,78678585,78684989,78686953,78688795,78690921,78692779,78693075,78693604,78695743,78696405,78698035,78700175,78701966,78704318,	0	Acsl3	cmpl	cmpl	-1,0,0,1,0,1,2,0,0,2,1,1,1,2,1,
chr1	78640629	78641418	MACS_peak_184	255.2	UPSTREAM	NM_001136222	chr1	+	78654399	78704318	78684889	78702990	14	78654399,78684811,78686843,78688656,78690770,78692655,78693003,78693464,78695570,78696330,78697843,78700060,78701808,78702832,	78654678,78684989,78686953,78688795,78690921,78692779,78693075,78693604,78695743,78696405,78698035,78700175,78701966,78704318,	0	Acsl3	cmpl	cmpl	-1,0,1,0,1,2,0,0,2,1,1,1,2,1,
chr1	78640629	78641418	MACS_peak_184	255.2	UPSTREAM	NM_028817	chr1	+	78654399	78704318	78678207	78702990	16	78654399,78659715,78678167,78684811,78686843,78688656,78690770,78692655,78693003,78693464,78695570,78696330,78697843,78700060,78701808,78702832,	78654678,78659855,78678585,78684989,78686953,78688795,78690921,78692779,78693075,78693604,78695743,78696405,78698035,78700175,78701966,78704318,	0	Acsl3	cmpl	cmpl	-1,-1,0,0,1,0,1,2,0,0,2,1,1,1,2,1,
chr1	78640629	78641418	MACS_peak_184	255.2	UPSTREAM	NM_001136226	chr1	+	78655014	78664176	78660961	78663304	4	78655014,78656900,78659715,78660900,	78655235,78656965,78659855,78664176,	0	Utp14b	cmpl	cmpl	-1,-1,-1,0,
chr1	78640629	78641418	MACS_peak_184	255.2	UPSTREAM	NM_001001981	chr1	+	78654399	78664176	78660961	78663304	3	78654399,78659715,78660900,	78654678,78659855,78664176,	0	Utp14b	cmpl	cmpl	-1,-1,0,
chr1	78643903	78644472	MACS_peak_185	52.64	UPSTREAM	NM_001033606	chr1	+	78654399	78704318	78678207	78702990	15	78654399,78678167,78684811,78686843,78688656,78690770,78692655,78693003,78693464,78695570,78696330,78697843,78700060,78701808,78702832,	78654678,78678585,78684989,78686953,78688795,78690921,78692779,78693075,78693604,78695743,78696405,78698035,78700175,78701966,78704318,	0	Acsl3	cmpl	cmpl	-1,0,0,1,0,1,2,0,0,2,1,1,1,2,1,
chr1	78643903	78644472	MACS_peak_185	52.64	UPSTREAM	NM_001136222	chr1	+	78654399	78704318	78684889	78702990	14	78654399,78684811,78686843,78688656,78690770,78692655,78693003,78693464,78695570,78696330,78697843,78700060,78701808,78702832,	78654678,78684989,78686953,78688795,78690921,78692779,78693075,78693604,78695743,78696405,78698035,78700175,78701966,78704318,	0	Acsl3	cmpl	cmpl	-1,0,1,0,1,2,0,0,2,1,1,1,2,1,
chr1	78643903	78644472	MACS_peak_185	52.64	UPSTREAM	NM_028817	chr1	+	78654399	78704318	78678207	78702990	16	78654399,78659715,78678167,78684811,78686843,78688656,78690770,78692655,78693003,78693464,78695570,78696330,78697843,78700060,78701808,78702832,	78654678,78659855,78678585,78684989,78686953,78688795,78690921,78692779,78693075,78693604,78695743,78696405,78698035,78700175,78701966,78704318,	0	Acsl3	cmpl	cmpl	-1,-1,0,0,1,0,1,2,0,0,2,1,1,1,2,1,
chr1	78643903	78644472	MACS_peak_185	52.64	UPSTREAM	NM_001136226	chr1	+	78655014	78664176	78660961	78663304	4	78655014,78656900,78659715,78660900,	78655235,78656965,78659855,78664176,	0	Utp14b	cmpl	cmpl	-1,-1,-1,0,
chr1	78643903	78644472	MACS_peak_185	52.64	UPSTREAM	NM_001001981	chr1	+	78654399	78664176	78660961	78663304	3	78654399,78659715,78660900,	78654678,78659855,78664176,	0	Utp14b	cmpl	cmpl	-1,-1,0,
chr1	79772237	79772744	MACS_peak_186	50.59	TSS	NM_001081210	chr1	+	79772592	79778020	79772707	79777713	4	79772592,79774432,79776062,79777538,	79772886,79774901,79776241,79778020,	0	Mrpl44	cmpl	cmpl	0,2,0,2,
chr1	79932279	79933044	MACS_peak_187	86.77	NONE
chr1	80072125	80072759	MACS_peak_188	68.85	NONE
chr1	80205005	80205862	MACS_peak_189	100.79	TSS	NM_173425	chr1	-	80195273	80210519	80196484	80210239	2	80195273,80209507,	80197123,80210519,	0	Fam124b	cmpl	cmpl	0,0,
chr1	80217633	80218063	MACS_peak_190	101.14	NONE
chr1	81854029	81854669	MACS_peak_191	61.04	NONE
chr1	82147349	82147856	MACS_peak_192	50.59	NONE
chr1	82227945	82228716	MACS_peak_193	57.88	DOWNSTREAM	NM_010570	chr1	-	82229679	82288014	82283372	82287068	2	82229679,82283351,	82234179,82288014,	0	Irs1	cmpl	cmpl	-1,0,
chr1	82269964	82270650	MACS_peak_194	50.7	TSS	NM_010570	chr1	-	82229679	82288014	82283372	82287068	2	82229679,82283351,	82234179,82288014,	0	Irs1	cmpl	cmpl	-1,0,
chr1	82290520	82291165	MACS_peak_195	60.63	UPSTREAM	NM_029777	chr1	+	82313153	82441941	82336972	82439529	7	82313153,82336893,82339304,82364866,82366908,82374135,82439437,	82313223,82337405,82339437,82364955,82366965,82374279,82441941,	0	Rhbdd1	cmpl	cmpl	-1,0,1,2,1,1,1,
chr1	82290520	82291165	MACS_peak_195	60.63	TSS	NM_010570	chr1	-	82229679	82288014	82283372	82287068	2	82229679,82283351,	82234179,82288014,	0	Irs1	cmpl	cmpl	-1,0,
chr1	82425578	82426190	MACS_peak_196	120.6	INTRAGENIC	NM_029777	chr1	+	82313153	82441941	82336972	82439529	7	82313153,82336893,82339304,82364866,82366908,82374135,82439437,	82313223,82337405,82339437,82364955,82366965,82374279,82441941,	0	Rhbdd1	cmpl	cmpl	-1,0,1,2,1,1,1,
chr1	82425578	82426190	MACS_peak_196	120.6	INTRAGENIC	NM_001122685	chr1	+	82335623	82441941	82336972	82439529	7	82335623,82336893,82339304,82364866,82366908,82374135,82439437,	82335871,82337405,82339437,82364955,82366965,82374279,82441941,	0	Rhbdd1	cmpl	cmpl	-1,0,1,2,1,1,1,
chr1	82425578	82426190	MACS_peak_196	120.6	DOWNSTREAM	NM_007735	chr1	-	82447297	82583424	82449705	82567990	48	82447297,82450351,82452297,82453353,82458625,82458901,82463061,82466053,82467557,82467763,82469052,82476432,82477056,82480965,82482155,82483057,82484086,82485585,82486274,82488099,82489022,82490067,82492345,82493728,82494402,82495509,82503520,82505742,82515503,82520425,82521561,82522439,82524103,82525026,82525326,82526139,82527932,82528174,82529491,82531169,82532315,82535605,82536528,82537744,825…	82449969,82450638,82452486,82453470,82458753,82458907,82463170,82466209,82467671,82467892,82469124,82476540,82477164,82481040,82482219,82483239,82484191,82485729,82486445,82488261,82489241,82490175,82492414,82493912,82494509,82495582,82503684,82505832,82515668,82520530,82521631,82522493,82524148,82525086,82525380,82526220,82527974,82528210,82529554,82531205,82532384,82535722,82536573,82537879,825…	0	Col4a4	cmpl	cmpl	0,1,1,1,2,2,1,1,1,1,1,1,1,1,0,1,1,1,1,1,1,1,1,0,1,0,1,1,1,1,0,0,0,0,0,0,0,0,0,0,0,0,0,0,0,2,0,-1,
chr1	82436406	82436983	MACS_peak_197	52	INTRAGENIC	NM_029777	chr1	+	82313153	82441941	82336972	82439529	7	82313153,82336893,82339304,82364866,82366908,82374135,82439437,	82313223,82337405,82339437,82364955,82366965,82374279,82441941,	0	Rhbdd1	cmpl	cmpl	-1,0,1,2,1,1,1,
chr1	82436406	82436983	MACS_peak_197	52	INTRAGENIC	NM_001122685	chr1	+	82335623	82441941	82336972	82439529	7	82335623,82336893,82339304,82364866,82366908,82374135,82439437,	82335871,82337405,82339437,82364955,82366965,82374279,82441941,	0	Rhbdd1	cmpl	cmpl	-1,0,1,2,1,1,1,
chr1	82436406	82436983	MACS_peak_197	52	DOWNSTREAM	NM_007735	chr1	-	82447297	82583424	82449705	82567990	48	82447297,82450351,82452297,82453353,82458625,82458901,82463061,82466053,82467557,82467763,82469052,82476432,82477056,82480965,82482155,82483057,82484086,82485585,82486274,82488099,82489022,82490067,82492345,82493728,82494402,82495509,82503520,82505742,82515503,82520425,82521561,82522439,82524103,82525026,82525326,82526139,82527932,82528174,82529491,82531169,82532315,82535605,82536528,82537744,825…	82449969,82450638,82452486,82453470,82458753,82458907,82463170,82466209,82467671,82467892,82469124,82476540,82477164,82481040,82482219,82483239,82484191,82485729,82486445,82488261,82489241,82490175,82492414,82493912,82494509,82495582,82503684,82505832,82515668,82520530,82521631,82522493,82524148,82525086,82525380,82526220,82527974,82528210,82529554,82531205,82532384,82535722,82536573,82537879,825…	0	Col4a4	cmpl	cmpl	0,1,1,1,2,2,1,1,1,1,1,1,1,1,0,1,1,1,1,1,1,1,1,0,1,0,1,1,1,1,0,0,0,0,0,0,0,0,0,0,0,0,0,0,0,2,0,-1,
chr1	82485655	82486151	MACS_peak_198	59.01	NONE
chr1	82835591	82836252	MACS_peak_199	97.43	TSS	NM_010472	chr1	+	82836057	82892850	82836297	82891633	13	82836057,82854930,82867259,82871862,82872745,82876582,82878802,82879755,82882685,82882949,82889998,82891056,82891573,	82836464,82855024,82867375,82872025,82872899,82876702,82879012,82879936,82882762,82883042,82890157,82891142,82892850,	0	Agfg1	cmpl	cmpl	0,2,0,2,0,1,1,1,2,1,1,1,0,
chr1	82905239	82905780	MACS_peak_200	54.96	DOWNSTREAM	NM_010472	chr1	+	82836057	82892850	82836297	82891633	13	82836057,82854930,82867259,82871862,82872745,82876582,82878802,82879755,82882685,82882949,82889998,82891056,82891573,	82836464,82855024,82867375,82872025,82872899,82876702,82879012,82879936,82882762,82883042,82890157,82891142,82892850,	0	Agfg1	cmpl	cmpl	0,2,0,2,0,1,1,1,2,1,1,1,0,
chr1	83260929	83261479	MACS_peak_201	61.55	NONE
chr1	83493647	83494198	MACS_peak_202	54.11	NONE
chr1	84075198	84075597	MACS_peak_203	69.46	NONE
chr1	84633398	84633911	MACS_peak_204	50.09	TSS	NM_152915	chr1	-	84366413	84692796	84367338	84692303	13	84366413,84380359,84392189,84402513,84415223,84441969,84472919,84491305,84531426,84577230,84579578,84581887,84692027,	84367450,84380606,84392321,84402627,84415346,84442194,84473033,84491459,84531572,84577397,84579673,84582196,84692796,	0	Dner	cmpl	cmpl	2,1,1,1,1,1,1,0,1,2,0,0,0,
chr1	87654682	87655477	MACS_peak_205	84.01	NONE
chr1	88306059	88306464	MACS_peak_206	68.73	UPSTREAM	NM_027966	chr1	+	88322903	88324624	88322945	88324538	1	88322903,	88324624,	0	1700019O17Rik	cmpl	cmpl	0,
chr1	88336561	88337704	MACS_peak_207	119.13	DOWNSTREAM	NM_027966	chr1	+	88322903	88324624	88322945	88324538	1	88322903,	88324624,	0	1700019O17Rik	cmpl	cmpl	0,
chr1	88383585	88384328	MACS_peak_208	81.3	NONE
chr1	88399577	88400493	MACS_peak_209	110.38	UPSTREAM	NM_008972	chr1	+	88423310	88427273	88423480	88426587	5	88423310,88425747,88426030,88426305,88426539,	88423525,88425819,88426127,88426379,88427273,	0	Ptma	cmpl	cmpl	0,0,0,1,0,
chr1	88418598	88419419	MACS_peak_210	300.76	TSS	NM_008972	chr1	+	88423310	88427273	88423480	88426587	5	88423310,88425747,88426030,88426305,88426539,	88423525,88425819,88426127,88426379,88427273,	0	Ptma	cmpl	cmpl	0,0,0,1,0,
chr1	88422339	88423024	MACS_peak_211	64.45	TSS	NM_008972	chr1	+	88423310	88427273	88423480	88426587	5	88423310,88425747,88426030,88426305,88426539,	88423525,88425819,88426127,88426379,88427273,	0	Ptma	cmpl	cmpl	0,0,0,1,0,
chr1	89110194	89110666	MACS_peak_212	69.36	TSS	NM_001039169	chr1	+	89110513	89125433	89111065	89124448	7	89110513,89116155,89117494,89120927,89122424,89122671,89124375,	89111070,89116270,89117629,89121032,89122577,89122808,89125433,	0	Eif4e2	cmpl	cmpl	0,2,0,0,0,0,2,
chr1	89148505	89149387	MACS_peak_213	106.03	UPSTREAM	NM_028889	chr1	+	89160938	89207366	89161024	89206370	4	89160938,89186042,89194203,89206235,	89161329,89186190,89194338,89207366,	0	Efhd1	cmpl	cmpl	0,2,0,0,
chr1	89148505	89149387	MACS_peak_213	106.03	DOWNSTREAM	NM_001039169	chr1	+	89110513	89125433	89111065	89124448	7	89110513,89116155,89117494,89120927,89122424,89122671,89124375,	89111070,89116270,89117629,89121032,89122577,89122808,89125433,	0	Eif4e2	cmpl	cmpl	0,2,0,0,0,0,2,
chr1	89148505	89149387	MACS_peak_213	106.03	DOWNSTREAM	NM_023314	chr1	+	89110488	89137063	89110574	89134460	7	89110488,89116155,89117494,89120927,89122424,89122671,89134420,	89110594,89116270,89117629,89121032,89122577,89122808,89137063,	0	Eif4e2	cmpl	cmpl	0,2,0,0,0,0,2,
chr1	89148505	89149387	MACS_peak_213	106.03	DOWNSTREAM	NM_001039170	chr1	+	89110488	89125433	89110574	89124448	7	89110488,89116155,89117494,89120927,89122424,89122671,89124375,	89110594,89116270,89117629,89121032,89122577,89122808,89125433,	0	Eif4e2	cmpl	cmpl	0,2,0,0,0,0,2,
chr1	89307112	89307831	MACS_peak_214	54.97	INTRAGENIC	NM_146112	chr1	+	89223572	89347385	89251020	89345720	29	89223572,89230844,89250978,89260678,89261758,89270571,89275546,89276542,89300241,89303558,89303867,89304109,89307236,89308282,89313392,89315662,89316859,89318065,89319755,89321639,89325144,89330254,89333343,89336962,89337291,89338585,89340219,89342886,89345652,	89223667,89230909,89251061,89260808,89261854,89270686,89275658,89276583,89300421,89303776,89304030,89304298,89307433,89308442,89313559,89315754,89316967,89318166,89319856,89321801,89325303,89330491,89333466,89337187,89337497,89338740,89340401,89343034,89347385,	0	Gigyf2	cmpl	cmpl	-1,-1,0,2,0,0,1,2,1,1,0,1,1,0,1,0,2,2,1,0,0,0,0,0,0,2,1,0,1,
chr1	89307112	89307831	MACS_peak_214	54.97	INTRAGENIC	NM_001110212	chr1	+	89223603	89347385	89251020	89345720	29	89223603,89230844,89250978,89260678,89261758,89270571,89275546,89276542,89300241,89303576,89303867,89304109,89307236,89308282,89313392,89315662,89316859,89318065,89319755,89321639,89325144,89330254,89333343,89336962,89337291,89338585,89340219,89342886,89345652,	89223667,89230909,89251061,89260808,89261854,89270686,89275658,89276583,89300421,89303776,89304030,89304298,89307433,89308442,89313559,89315754,89316967,89318166,89319856,89321801,89325303,89330491,89333466,89337187,89337497,89338740,89340401,89343034,89347385,	0	Gigyf2	cmpl	cmpl	-1,-1,0,2,0,0,1,2,1,1,0,1,1,0,1,0,2,2,1,0,0,0,0,0,0,2,1,0,1,
chr1	89999425	89999823	MACS_peak_215	116.05	TSS	NM_201642	chr1	+	89991575	90116577	89991695	90114999	5	89991575,90111618,90112369,90112712,90114701,	89992553,90111750,90112457,90112932,90116577,	0	Ugt1a7c	cmpl	cmpl	0,0,0,1,2,
chr1	90125078	90125660	MACS_peak_216	51.61	DOWNSTREAM	NM_201642	chr1	+	89991575	90116577	89991695	90114999	5	89991575,90111618,90112369,90112712,90114701,	89992553,90111750,90112457,90112932,90116577,	0	Ugt1a7c	cmpl	cmpl	0,0,0,1,2,
chr1	90125078	90125660	MACS_peak_216	51.61	DOWNSTREAM	NM_201641	chr1	+	89951985	90116577	89952056	90114999	5	89951985,90111618,90112369,90112712,90114701,	89952911,90111750,90112457,90112932,90116577,	0	Ugt1a10	cmpl	cmpl	0,0,0,1,2,
chr1	90125078	90125660	MACS_peak_216	51.61	DOWNSTREAM	NM_013701	chr1	+	90097185	90116577	90097211	90114999	5	90097185,90111618,90112369,90112712,90114701,	90098075,90111750,90112457,90112932,90116577,	0	Ugt1a2	cmpl	cmpl	0,0,0,1,2,
chr1	90125078	90125660	MACS_peak_216	51.61	DOWNSTREAM	NM_201643	chr1	+	90062586	90116577	90062626	90114999	5	90062586,90111618,90112369,90112712,90114701,	90063478,90111750,90112457,90112932,90116577,	0	Ugt1a5	cmpl	cmpl	0,0,0,1,2,
chr1	90125078	90125660	MACS_peak_216	51.61	INTRAGENIC	NM_001177364	chr1	+	90123594	90158864	90124642	90156601	43	90123594,90124628,90124801,90126916,90127200,90128818,90129891,90130576,90131163,90131528,90131764,90131947,90133229,90134047,90134419,90135468,90136693,90137253,90137645,90138117,90138978,90139243,90140505,90141518,90142562,90143710,90144322,90145126,90146277,90146839,90147819,90148910,90151432,90151664,90152112,90152631,90152974,90153225,90154284,90155157,90155693,90156104,90156479,	90123803,90124721,90124983,90127048,90127363,90128917,90130043,90130691,90131185,90131637,90131843,90132061,90133306,90134167,90134530,90135616,90136734,90137395,90137698,90138225,90139098,90139366,90140658,90141641,90142642,90143819,90144418,90145231,90146401,90146958,90147972,90149065,90151592,90151868,90152255,90152746,90153124,90153408,90154440,90155289,90155796,90156170,90158864,	0	Heatr7b1	cmpl	cmpl	-1,0,1,0,0,1,1,0,1,2,0,1,1,0,0,0,1,0,1,0,0,0,0,0,0,2,0,0,0,1,0,0,2,0,0,2,0,0,0,0,0,1,1,
chr1	90125078	90125660	MACS_peak_216	51.61	DOWNSTREAM	NM_201645	chr1	+	90108533	90116577	90108576	90114999	5	90108533,90111618,90112369,90112712,90114701,	90109446,90111750,90112457,90112932,90116577,	0	Ugt1a1	cmpl	cmpl	0,0,0,1,2,
chr1	90125078	90125660	MACS_peak_216	51.61	DOWNSTREAM	NM_145079	chr1	+	90031383	90116577	90035048	90114999	6	90031383,90035047,90111618,90112369,90112712,90114701,	90031510,90035906,90111750,90112457,90112932,90116577,	0	Ugt1a6a	cmpl	cmpl	-1,0,0,0,1,2,
chr1	90125078	90125660	MACS_peak_216	51.61	DOWNSTREAM	NM_201410	chr1	+	89999831	90115573	90003516	90114999	6	89999831,90003515,90111618,90112369,90112712,90114701,	89999953,90004374,90111750,90112457,90112932,90115573,	0	Ugt1a6b	cmpl	cmpl	-1,0,0,0,1,2,
chr1	90125078	90125660	MACS_peak_216	51.61	DOWNSTREAM	NM_201644	chr1	+	89967353	90116577	89967404	90114999	5	89967353,90111618,90112369,90112712,90114701,	89968253,90111750,90112457,90112932,90116577,	0	Ugt1a9	cmpl	cmpl	0,0,0,1,2,
chr1	90152750	90153311	MACS_peak_217	53.29	DOWNSTREAM	NM_172505	chr1	-	90161402	90174132	90161755	90174044	5	90161402,90164522,90171616,90173795,90173948,	90163233,90164601,90171674,90173860,90174132,	0	A730008H23Rik	cmpl	cmpl	1,0,2,0,0,
chr1	90152750	90153311	MACS_peak_217	53.29	INTRAGENIC	NM_001177364	chr1	+	90123594	90158864	90124642	90156601	43	90123594,90124628,90124801,90126916,90127200,90128818,90129891,90130576,90131163,90131528,90131764,90131947,90133229,90134047,90134419,90135468,90136693,90137253,90137645,90138117,90138978,90139243,90140505,90141518,90142562,90143710,90144322,90145126,90146277,90146839,90147819,90148910,90151432,90151664,90152112,90152631,90152974,90153225,90154284,90155157,90155693,90156104,90156479,	90123803,90124721,90124983,90127048,90127363,90128917,90130043,90130691,90131185,90131637,90131843,90132061,90133306,90134167,90134530,90135616,90136734,90137395,90137698,90138225,90139098,90139366,90140658,90141641,90142642,90143819,90144418,90145231,90146401,90146958,90147972,90149065,90151592,90151868,90152255,90152746,90153124,90153408,90154440,90155289,90155796,90156170,90158864,	0	Heatr7b1	cmpl	cmpl	-1,0,1,0,0,1,1,0,1,2,0,1,1,0,0,0,1,0,1,0,0,0,0,0,0,2,0,0,0,1,0,0,2,0,0,2,0,0,0,0,0,1,1,
chr1	90152750	90153311	MACS_peak_217	53.29	DOWNSTREAM	NR_040291	chr1	-	90159687	90165983	90165983	90165983	5	90159687,90162904,90163166,90164522,90165895,	90162853,90163142,90163233,90164601,90165983,	0	6430706D22Rik	unk	unk	-1,-1,-1,-1,-1,
chr1	90152750	90153311	MACS_peak_217	53.29	DOWNSTREAM	NM_198652	chr1	-	90155430	90174154	90161755	90174044	8	90155430,90164522,90165895,90166776,90169303,90171616,90173793,90173948,	90163233,90164601,90165988,90166874,90169340,90171672,90173860,90174154,	0	Hjurp	cmpl	cmpl	1,0,0,1,0,1,0,0,
chr1	90173959	90174510	MACS_peak_218	77.01	TSS	NM_172505	chr1	-	90161402	90174132	90161755	90174044	5	90161402,90164522,90171616,90173795,90173948,	90163233,90164601,90171674,90173860,90174132,	0	A730008H23Rik	cmpl	cmpl	1,0,2,0,0,
chr1	90422573	90423602	MACS_peak_219	215.03	UPSTREAM	NR_037971	chr1	+	90448091	90458741	90458741	90458741	6	90448091,90451731,90452899,90453783,90456442,90457150,	90448342,90451827,90453350,90453893,90456565,90458741,	0	Gm19589	unk	unk	-1,-1,-1,-1,-1,-1,
chr1	90602186	90602778	MACS_peak_220	114.42	TSS	NM_177305	chr1	-	90594800	90598766	90597660	90598239	1	90594800,	90598766,	0	Arl4c	cmpl	cmpl	0,
chr1	90966365	90966914	MACS_peak_221	69.3	TSS	NM_133816	chr1	+	90967036	91050368	91034260	91049926	6	90967036,91003832,91034133,91040124,91048774,91049701,	90967172,91003911,91034378,91042481,91048963,91050368,	0	Sh3bp4	cmpl	cmpl	-1,-1,0,1,0,0,
chr1	91171873	91172921	MACS_peak_222	168.68	NONE
chr1	91505647	91506318	MACS_peak_223	247.95	INTRAGENIC	NM_178119	chr1	+	91351385	91791857	91352004	91785469	18	91351385,91501172,91506070,91524335,91526962,91530734,91560235,91561608,91567753,91622535,91640302,91662880,91685737,91731008,91734286,91739595,91784080,91785265,	91352167,91501231,91506158,91524421,91527104,91530869,91560363,91561764,91567846,91622640,91640471,91663039,91685899,91731163,91734377,91739818,91784336,91791857,	0	Agap1	cmpl	cmpl	0,1,0,1,0,1,1,0,0,0,0,1,1,1,0,1,2,0,
chr1	91505647	91506318	MACS_peak_223	247.95	INTRAGENIC	NM_001037136	chr1	+	91351385	91791857	91352004	91785469	17	91351385,91501172,91506070,91524335,91526962,91530734,91560235,91561608,91567753,91622535,91640302,91685737,91731008,91734286,91739595,91784080,91785265,	91352167,91501231,91506158,91524421,91527104,91530869,91560363,91561764,91567846,91622640,91640471,91685899,91731163,91734377,91739818,91784336,91791857,	0	Agap1	cmpl	cmpl	0,1,0,1,0,1,1,0,0,0,0,1,1,0,1,2,0,
chr1	91570341	91570928	MACS_peak_224	65.66	INTRAGENIC	NM_178119	chr1	+	91351385	91791857	91352004	91785469	18	91351385,91501172,91506070,91524335,91526962,91530734,91560235,91561608,91567753,91622535,91640302,91662880,91685737,91731008,91734286,91739595,91784080,91785265,	91352167,91501231,91506158,91524421,91527104,91530869,91560363,91561764,91567846,91622640,91640471,91663039,91685899,91731163,91734377,91739818,91784336,91791857,	0	Agap1	cmpl	cmpl	0,1,0,1,0,1,1,0,0,0,0,1,1,1,0,1,2,0,
chr1	91570341	91570928	MACS_peak_224	65.66	INTRAGENIC	NM_001037136	chr1	+	91351385	91791857	91352004	91785469	17	91351385,91501172,91506070,91524335,91526962,91530734,91560235,91561608,91567753,91622535,91640302,91685737,91731008,91734286,91739595,91784080,91785265,	91352167,91501231,91506158,91524421,91527104,91530869,91560363,91561764,91567846,91622640,91640471,91685899,91731163,91734377,91739818,91784336,91791857,	0	Agap1	cmpl	cmpl	0,1,0,1,0,1,1,0,0,0,0,1,1,0,1,2,0,
chr1	91570341	91570928	MACS_peak_224	65.66	DOWNSTREAM	NR_015540	chr1	-	91573081	91580467	91580467	91580467	4	91573081,91576546,91577730,91580261,	91576243,91576679,91577840,91580467,	0	4933400F21Rik	unk	unk	-1,-1,-1,-1,
chr1	91996787	91997794	MACS_peak_225	182.42	NONE
chr1	92049564	92050486	MACS_peak_226	87.52	TSS	NM_029122	chr1	-	91938706	92049976	91939200	92049750	19	91938706,91942166,91944363,91948962,91963299,91967086,91970321,91974381,91977434,91977890,91986049,91994512,92000397,92026627,92034725,92036457,92039250,92041395,92049739,	91939317,91942405,91944541,91949049,91963499,91967194,91970404,91974449,91977527,91977997,91986125,91994638,92000482,92026833,92034797,92036649,92039367,92041720,92049976,	0	Iqca	cmpl	cmpl	0,1,0,0,1,1,2,0,0,1,0,0,2,0,0,0,0,2,0,
chr1	92079966	92080683	MACS_peak_227	198.23	UPSTREAM	NM_007722	chr1	+	92100577	92112863	92110395	92111484	2	92100577,92110369,	92100662,92112863,	0	Cxcr7	cmpl	cmpl	-1,0,
chr1	92100015	92100784	MACS_peak_228	71.75	TSS	NM_007722	chr1	+	92100577	92112863	92110395	92111484	2	92100577,92110369,	92100662,92112863,	0	Cxcr7	cmpl	cmpl	-1,0,
chr1	92101638	92102256	MACS_peak_229	78	TSS	NM_007722	chr1	+	92100577	92112863	92110395	92111484	2	92100577,92110369,	92100662,92112863,	0	Cxcr7	cmpl	cmpl	-1,0,
chr1	92124803	92125315	MACS_peak_230	50.17	DOWNSTREAM	NM_007722	chr1	+	92100577	92112863	92110395	92111484	2	92100577,92110369,	92100662,92112863,	0	Cxcr7	cmpl	cmpl	-1,0,
chr1	92155564	92156124	MACS_peak_231	60.64	NONE
chr1	92179491	92180004	MACS_peak_232	57.43	NONE
chr1	92335406	92335996	MACS_peak_233	65.39	NONE
chr1	92337142	92337887	MACS_peak_234	73.76	NONE
chr1	92353610	92354378	MACS_peak_235	101.97	NONE
chr1	92384328	92384907	MACS_peak_236	82.06	NONE
chr1	92424671	92425447	MACS_peak_237	93.34	NONE
chr1	93303939	93304576	MACS_peak_238	68.58	TSS	NR_026924	chr1	-	93301456	93302606	93302606	93302606	3	93301456,93302072,93302482,	93301759,93302191,93302606,	0	1700020N18Rik	unk	unk	-1,-1,-1,
chr1	93332886	93333568	MACS_peak_239	120.17	NONE
chr1	94007788	94008577	MACS_peak_240	70.13	TSS	NM_207225	chr1	-	93829331	94044970	93829923	94044854	26	93829331,93830232,93831178,93842476,93843994,93851866,93852618,93854931,93855987,93858029,93861356,93864929,93867519,93869276,93872015,93878605,93880954,93881237,93884121,93888059,93892633,93898731,93909245,93926531,93951477,94044832,	93829963,93830374,93831263,93842610,93844113,93851964,93852738,93855019,93856043,93858137,93861403,93865035,93867653,93869463,93872270,93878829,93881150,93881354,93884234,93888191,93892755,93898852,93909396,93926773,93951549,94044970,	0	Hdac4	cmpl	cmpl	2,1,0,1,2,0,0,2,0,0,1,0,1,0,0,1,0,0,1,1,2,1,0,1,1,0,
chr1	94077000	94077722	MACS_peak_241	90.95	NONE
chr1	94370428	94370955	MACS_peak_242	56.17	DOWNSTREAM	NM_001011525	chr1	-	94387394	94388330	94387394	94388330	1	94387394,	94388330,	0	Olfr1415	cmpl	cmpl	0,
chr1	94370428	94370955	MACS_peak_242	56.17	TSS	NM_024197	chr1	-	94336295	94370335	94336415	94370314	10	94336295,94348587,94356956,94358867,94359654,94360937,94363957,94366439,94367393,94370239,	94336484,94348696,94357042,94358922,94359734,94361059,94364044,94366655,94367562,94370335,	0	Ndufa10	cmpl	cmpl	0,2,0,2,0,1,1,1,0,0,
chr1	94595716	94596116	MACS_peak_243	96.36	NONE
chr1	95195427	95195939	MACS_peak_244	50.17	DOWNSTREAM	NM_080850	chr1	-	95206013	95239365	95206668	95234108	18	95206013,95207344,95209372,95210857,95213361,95213597,95216536,95217070,95217351,95220778,95221940,95223792,95227331,95228135,95231119,95232186,95233921,95239102,	95206826,95207491,95209506,95211057,95213496,95213723,95216704,95217252,95218799,95220932,95222109,95224053,95227466,95228276,95231290,95232422,95234157,95239365,	0	Pask	cmpl	cmpl	1,1,2,0,0,0,0,1,2,1,0,0,0,0,0,1,0,-1,
chr1	95195427	95195939	MACS_peak_244	50.17	DOWNSTREAM	NM_172463	chr1	+	95132473	95193025	95132565	95192855	31	95132473,95152841,95155542,95156221,95158225,95158680,95161614,95161855,95167718,95168175,95168431,95169068,95170625,95170920,95171181,95171873,95177057,95177813,95178228,95178845,95179268,95179778,95180151,95180961,95182372,95182588,95183504,95185884,95186574,95192296,95192843,	95132778,95153129,95155683,95156384,95158351,95158794,95161728,95161969,95167844,95168280,95168545,95169185,95170742,95171037,95171295,95172047,95177171,95177927,95178342,95178959,95179565,95179962,95180264,95181243,95182517,95182671,95183600,95186001,95186662,95192378,95193025,	0	Sned1	cmpl	cmpl	0,0,0,0,1,1,1,1,1,1,1,1,1,1,1,1,1,1,1,1,1,1,2,1,1,2,1,1,1,2,0,
chr1	95195427	95195939	MACS_peak_244	50.17	DOWNSTREAM	NM_178051	chr1	-	95195787	95202447	95198036	95202422	4	95195787,95199294,95201184,95202401,	95198372,95199479,95201683,95202447,	0	Mterfd2	cmpl	cmpl	0,1,0,0,
chr1	95196271	95196919	MACS_peak_245	142.68	DOWNSTREAM	NM_080850	chr1	-	95206013	95239365	95206668	95234108	18	95206013,95207344,95209372,95210857,95213361,95213597,95216536,95217070,95217351,95220778,95221940,95223792,95227331,95228135,95231119,95232186,95233921,95239102,	95206826,95207491,95209506,95211057,95213496,95213723,95216704,95217252,95218799,95220932,95222109,95224053,95227466,95228276,95231290,95232422,95234157,95239365,	0	Pask	cmpl	cmpl	1,1,2,0,0,0,0,1,2,1,0,0,0,0,0,1,0,-1,
chr1	95196271	95196919	MACS_peak_245	142.68	DOWNSTREAM	NM_172463	chr1	+	95132473	95193025	95132565	95192855	31	95132473,95152841,95155542,95156221,95158225,95158680,95161614,95161855,95167718,95168175,95168431,95169068,95170625,95170920,95171181,95171873,95177057,95177813,95178228,95178845,95179268,95179778,95180151,95180961,95182372,95182588,95183504,95185884,95186574,95192296,95192843,	95132778,95153129,95155683,95156384,95158351,95158794,95161728,95161969,95167844,95168280,95168545,95169185,95170742,95171037,95171295,95172047,95177171,95177927,95178342,95178959,95179565,95179962,95180264,95181243,95182517,95182671,95183600,95186001,95186662,95192378,95193025,	0	Sned1	cmpl	cmpl	0,0,0,0,1,1,1,1,1,1,1,1,1,1,1,1,1,1,1,1,1,1,2,1,1,2,1,1,1,2,0,
chr1	95374523	95375540	MACS_peak_246	93.83	TSS	NM_001159719	chr1	+	95375637	95406309	95385722	95403641	13	95375637,95385700,95387733,95392155,95393917,95395588,95395849,95397034,95398083,95400011,95402120,95403539,95404289,	95375757,95385731,95387854,95392242,95394041,95395723,95395967,95397136,95398229,95400095,95402178,95403659,95406309,	0	Sept2	cmpl	cmpl	-1,0,0,1,1,2,2,0,0,2,2,0,-1,
chr1	95576857	95577356	MACS_peak_247	58.73	TSS	NM_016778	chr1	+	95582270	95592339	95583023	95591739	5	95582270,95582994,95585733,95590636,95591613,	95582431,95583246,95585862,95590800,95592339,	0	Bok	cmpl	cmpl	-1,0,1,1,0,
chr1	95700148	95700765	MACS_peak_248	94.18	UPSTREAM	NM_178882	chr1	+	95721816	95748751	95722883	95747403	10	95721816,95722861,95725782,95726333,95729172,95731863,95734516,95735397,95744679,95747143,	95721896,95723217,95725840,95726473,95729366,95732032,95734660,95735540,95744845,95748751,	0	D2hgdh	cmpl	cmpl	-1,0,1,2,1,0,1,1,0,1,
chr1	95700148	95700765	MACS_peak_248	94.18	TSS	NM_025454	chr1	+	95700541	95718677	95700579	95714900	8	95700541,95702624,95708358,95708983,95709242,95712951,95713214,95714857,	95700616,95702696,95708525,95709095,95709336,95713087,95713276,95718677,	0	Ing5	cmpl	cmpl	0,1,1,0,1,2,0,2,
chr1	96404457	96404966	MACS_peak_249	50.42	NONE
chr1	96426450	96427068	MACS_peak_250	55.75	NONE
chr1	96478672	96479332	MACS_peak_251	97.54	NONE
chr1	98612579	98613020	MACS_peak_252	72.9	NONE
chr1	99666331	99666925	MACS_peak_253	50.68	TSS	NM_173760	chr1	-	99602622	99666669	99604294	99658115	28	99602622,99608299,99609580,99616410,99620246,99623765,99623971,99625494,99626487,99630462,99631543,99637038,99637400,99637646,99640633,99641739,99641971,99642994,99644123,99646118,99647143,99649280,99651631,99652462,99653420,99655745,99658001,99666431,	99604407,99608425,99609721,99616483,99620411,99623882,99624079,99625609,99626615,99630686,99631685,99637221,99637522,99637772,99640719,99641849,99642047,99643081,99644225,99646240,99647305,99649382,99651786,99652548,99653511,99655941,99658398,99666669,	0	Ppip5k2	cmpl	cmpl	1,1,1,0,0,0,0,2,0,1,0,0,1,1,2,0,2,2,2,0,0,0,1,2,1,0,0,-1,
chr1	99747938	99748486	MACS_peak_254	69.4	NONE
chr1	99822877	99823659	MACS_peak_255	70.69	NONE
chr1	99942955	99943430	MACS_peak_256	69.04	TSS	NR_037993	chr1	-	99927699	99944370	99944370	99944370	3	99927699,99929692,99944278,	99928685,99929792,99944370,	0	B230216N24Rik	unk	unk	-1,-1,-1,
chr1	100386694	100387260	MACS_peak_257	52.88	INTRAGENIC	NM_001164233	chr1	+	100317700	100405957	100317782	100405797	13	100317700,100319665,100324842,100328809,100340204,100343289,100363234,100377167,100387073,100392761,100394053,100396335,100405795,	100318074,100319926,100325028,100328906,100340323,100343399,100363379,100377363,100387227,100392949,100394118,100396473,100405957,	0	Slco6d1	cmpl	cmpl	0,1,1,1,2,1,0,1,2,0,2,1,1,
chr1	100386694	100387260	MACS_peak_257	52.88	INTRAGENIC	NM_027584	chr1	+	100317700	100405957	100317782	100404190	14	100317700,100319665,100324842,100328809,100340204,100343289,100363234,100377167,100387073,100392761,100394053,100396335,100404089,100405795,	100318074,100319926,100325028,100328906,100340323,100343399,100363379,100377363,100387227,100392949,100394118,100396473,100404222,100405957,	0	Slco6d1	cmpl	cmpl	0,1,1,1,2,1,0,1,2,0,2,1,1,-1,
chr1	102169404	102169988	MACS_peak_258	51.45	INTRAGENIC	NM_172851	chr1	+	101669341	102382519	101669341	102381278	24	101669341,101837219,101863768,101947218,101968624,101972606,101994310,102037750,102056614,102060644,102110243,102151635,102170937,102255230,102266333,102266634,102275627,102279957,102287043,102328292,102343410,102374934,102378481,102381081,	101669423,101837324,101863962,101947366,101968828,101972791,101994451,102038015,102056764,102060816,102110350,102151755,102171138,102255348,102266461,102266805,102275846,102280197,102287268,102328423,102343495,102375153,102378553,102382519,	0	Cntnap5b	cmpl	cmpl	0,1,1,0,1,1,0,0,1,1,2,1,1,1,2,1,1,1,1,1,0,1,1,1,
chr1	107069479	107069964	MACS_peak_259	52.49	NONE
chr1	107383659	107384260	MACS_peak_260	104.53	NONE
chr1	107560457	107560969	MACS_peak_261	50.17	TSS	NM_013784	chr1	-	107414998	107560253	107418580	107554399	31	107414998,107443240,107445641,107448948,107450640,107451020,107454039,107454564,107462724,107476498,107481565,107484556,107485625,107485802,107488198,107494244,107495625,107534086,107534759,107537241,107541055,107543274,107544685,107545859,107549680,107552510,107553242,107554178,107555463,107555869,107560076,	107418704,107443293,107445684,107449022,107450716,107451076,107454126,107454667,107462827,107476607,107481674,107484648,107485718,107485902,107488338,107494427,107495704,107534142,107534852,107537301,107541096,107543391,107544816,107545984,107549787,107552609,107553364,107554427,107555583,107555943,107560253,	0	Pign	cmpl	cmpl	2,0,2,0,2,0,0,2,1,0,2,0,0,2,0,0,2,0,0,0,1,1,2,0,1,1,2,0,-1,-1,-1,
chr1	107889802	107890283	MACS_peak_262	52.85	TSS	NM_001122676	chr1	+	107886982	107930654	107887366	107928740	14	107886982,107897507,107900676,107902591,107908278,107912575,107914795,107916424,107918302,107919776,107920240,107923979,107926328,107928672,	107888284,107897619,107900753,107902663,107908391,107912670,107914879,107916482,107918435,107919841,107920335,107924108,107927810,107930654,	0	Zcchc2	cmpl	cmpl	0,0,1,0,0,2,1,1,2,0,2,1,1,1,
chr1	107962162	107962815	MACS_peak_263	53.07	NONE
chr1	107973899	107974525	MACS_peak_264	127.63	NONE
chr1	108179145	108179702	MACS_peak_265	53.61	INTRAGENIC	NM_133821	chr1	+	108068445	108290822	108068580	108289917	17	108068445,108177939,108183567,108215425,108235313,108236016,108239953,108241436,108243661,108247108,108260817,108265590,108272737,108276894,108282903,108286250,108288705,	108070024,108178136,108183693,108215592,108235460,108236247,108240156,108241497,108243757,108247264,108261018,108265753,108272868,108276999,108283098,108286479,108290822,	0	Phlpp1	cmpl	cmpl	0,1,0,0,2,2,2,1,2,2,2,2,0,2,2,2,0,
chr1	108499034	108499736	MACS_peak_266	93	TSS	NM_009741	chr1	-	108434755	108610867	108439840	108609457	2	108434755,108608881,	108439975,108610867,	0	Bcl2	cmpl	cmpl	0,0,
chr1	108645412	108645883	MACS_peak_267	53.75	DOWNSTREAM	NM_009190	chr1	-	108667364	108693302	108669023	108693024	11	108667364,108670583,108673846,108675545,108676538,108677080,108679242,108683279,108686505,108688254,108692997,	108669125,108670724,108674066,108675627,108676687,108677237,108679362,108683347,108686662,108688366,108693302,	0	Vps4b	cmpl	cmpl	0,0,2,1,2,1,1,2,1,0,0,
chr1	108656034	108656880	MACS_peak_268	125.77	DOWNSTREAM	NM_009190	chr1	-	108667364	108693302	108669023	108693024	11	108667364,108670583,108673846,108675545,108676538,108677080,108679242,108683279,108686505,108688254,108692997,	108669125,108670724,108674066,108675627,108676687,108677237,108679362,108683347,108686662,108688366,108693302,	0	Vps4b	cmpl	cmpl	0,0,2,1,2,1,1,2,1,0,0,
chr1	108656034	108656880	MACS_peak_268	125.77	TSS	NM_027534	chr1	-	108616986	108656319	108621478	108656228	10	108616986,108624205,108631123,108635907,108640245,108644064,108644347,108649788,108652020,108656120,	108621598,108624307,108631207,108635991,108640437,108644160,108644413,108649845,108652110,108656319,	0	Kdsr	cmpl	cmpl	0,0,0,0,0,0,0,0,0,0,
chr1	108692967	108693663	MACS_peak_269	56.65	TSS	NM_009190	chr1	-	108667364	108693302	108669023	108693024	11	108667364,108670583,108673846,108675545,108676538,108677080,108679242,108683279,108686505,108688254,108692997,	108669125,108670724,108674066,108675627,108676687,108677237,108679362,108683347,108686662,108688366,108693302,	0	Vps4b	cmpl	cmpl	0,0,2,1,2,1,1,2,1,0,0,
chr1	108757184	108758075	MACS_peak_270	236.65	TSS	NM_009257	chr1	+	108757756	108779925	108766859	108778570	7	108757756,108766858,108768826,108771619,108772586,108776752,108778177,	108757837,108767027,108768964,108771737,108772729,108776920,108779925,	0	Serpinb5	cmpl	cmpl	-1,0,0,0,1,0,0,
chr1	108771702	108772349	MACS_peak_271	82.89	INTRAGENIC	NM_009257	chr1	+	108757756	108779925	108766859	108778570	7	108757756,108766858,108768826,108771619,108772586,108776752,108778177,	108757837,108767027,108768964,108771737,108772729,108776920,108779925,	0	Serpinb5	cmpl	cmpl	-1,0,0,0,1,0,0,
chr1	108840342	108840901	MACS_peak_272	76.16	TSS	NM_027971	chr1	+	108831025	108853655	108843123	108853374	8	108831025,108843105,108845700,108846138,108847278,108850267,108851898,108852969,	108831141,108843291,108845832,108846276,108847396,108850410,108852066,108853655,	0	Serpinb12	cmpl	cmpl	-1,0,0,0,0,1,0,0,
chr1	109425180	109425673	MACS_peak_273	119.62	DOWNSTREAM	NM_001174170	chr1	+	109407999	109422177	109412049	109421518	8	109407999,109412040,109416228,109418723,109419268,109419641,109420373,109421113,	109408055,109412217,109416348,109418852,109419386,109419784,109420538,109422177,	0	Serpinb2	cmpl	cmpl	-1,0,0,0,0,1,0,0,
chr1	109425180	109425673	MACS_peak_273	119.62	DOWNSTREAM	NM_011111	chr1	+	109408086	109422177	109412049	109421518	8	109408086,109412040,109416228,109418723,109419268,109419641,109420373,109421113,	109408161,109412217,109416348,109418852,109419386,109419784,109420538,109422177,	0	Serpinb2	cmpl	cmpl	-1,0,0,0,0,1,0,0,
chr1	109425180	109425673	MACS_peak_273	119.62	TSS	NM_001160307	chr1	+	109425579	109445848	109432084	109443649	7	109425579,109432021,109432569,109435003,109437464,109438768,109443244,	109425668,109432087,109432707,109435121,109437607,109438924,109445848,	0	Serpinb10	cmpl	cmpl	-1,0,0,0,1,0,0,
chr1	109757043	109757518	MACS_peak_274	53.39	NONE
chr1	109876062	109876548	MACS_peak_275	52.4	NONE
chr1	110179673	110180258	MACS_peak_276	51.37	NONE
chr1	111130069	111130637	MACS_peak_277	59.93	NONE
chr1	111808551	111809063	MACS_peak_278	50.17	NONE
chr1	112697178	112697771	MACS_peak_279	50.76	NONE
chr1	114512287	114512855	MACS_peak_280	52.72	NONE
chr1	118234821	118235379	MACS_peak_281	60.82	INTRAGENIC	NM_001077425	chr1	+	117581713	118477251	117581713	118477251	24	117581713,117797506,117811717,117956698,117985784,117998127,118014150,118053969,118080882,118084840,118118418,118156029,118188911,118308663,118325048,118325357,118338761,118343085,118351569,118414689,118420810,118468028,118474440,118477057,	117581795,117797611,117811911,117956846,117985988,117998312,118014291,118054234,118081032,118085012,118118525,118156149,118189112,118308820,118325176,118325528,118338980,118343325,118351794,118414820,118420895,118468247,118474512,118477251,	0	Cntnap5a	cmpl	cmpl	0,1,1,0,1,1,0,0,1,1,2,1,1,1,2,1,1,1,1,1,0,1,1,1,
chr1	118918435	118919000	MACS_peak_282	52.96	NONE
chr1	120355420	120356030	MACS_peak_283	71.07	INTRAGENIC	NM_001081276	chr1	+	120285634	120506039	120316300	120503571	39	120285634,120316016,120356377,120357763,120359042,120361104,120364456,120368348,120394210,120396224,120397878,120399429,120400396,120401472,120402058,120403516,120405391,120406148,120406782,120418403,120419897,120421873,120428554,120435842,120439678,120441969,120444441,120447663,120448589,120456562,120457587,120461719,120467425,120475397,120477849,120486997,120496954,120498941,120503484,	120286098,120316495,120356456,120357867,120359134,120361180,120364554,120368416,120394363,120396298,120397971,120399575,120400532,120401543,120402118,120403594,120405559,120406198,120406953,120418511,120419924,120422032,120428662,120435946,120439923,120442036,120444605,120447742,120448733,120456706,120457694,120461836,120467576,120475641,120478040,120487126,120497161,120499058,120506039,	0	Clasp1	cmpl	cmpl	-1,0,0,1,0,2,0,2,1,1,0,0,2,0,2,2,2,2,1,1,1,1,1,1,0,2,0,2,0,0,0,2,2,0,1,0,0,0,0,
chr1	120355420	120356030	MACS_peak_283	71.07	INTRAGENIC	NM_177548	chr1	+	120285634	120506039	120316300	120503571	37	120285634,120316016,120356377,120357763,120359042,120361104,120364456,120368348,120394210,120396224,120397878,120399429,120400396,120401472,120402058,120403516,120405391,120406148,120406782,120408751,120418403,120421873,120435842,120439678,120441969,120444441,120447663,120448589,120456562,120457587,120467425,120475397,120477849,120486997,120496954,120498941,120503484,	120286098,120316495,120356456,120357867,120359134,120361180,120364554,120368416,120394363,120396298,120397971,120399575,120400532,120401543,120402118,120403594,120405559,120406198,120406953,120408799,120418511,120422032,120435946,120439923,120442036,120444605,120447742,120448733,120456706,120457694,120467576,120475641,120478040,120487126,120497161,120499058,120506039,	0	Clasp1	cmpl	cmpl	-1,0,0,1,0,2,0,2,1,1,0,0,2,0,2,2,2,2,1,1,1,1,1,0,2,0,2,0,0,0,2,0,1,0,0,0,0,
chr1	120355420	120356030	MACS_peak_283	71.07	TSS	NR_027901	chr1	-	120355245	120355842	120355842	120355842	1	120355245,	120355842,	0	2900060B14Rik	unk	unk	-1,
chr1	120382040	120382549	MACS_peak_284	50.42	INTRAGENIC	NM_001081276	chr1	+	120285634	120506039	120316300	120503571	39	120285634,120316016,120356377,120357763,120359042,120361104,120364456,120368348,120394210,120396224,120397878,120399429,120400396,120401472,120402058,120403516,120405391,120406148,120406782,120418403,120419897,120421873,120428554,120435842,120439678,120441969,120444441,120447663,120448589,120456562,120457587,120461719,120467425,120475397,120477849,120486997,120496954,120498941,120503484,	120286098,120316495,120356456,120357867,120359134,120361180,120364554,120368416,120394363,120396298,120397971,120399575,120400532,120401543,120402118,120403594,120405559,120406198,120406953,120418511,120419924,120422032,120428662,120435946,120439923,120442036,120444605,120447742,120448733,120456706,120457694,120461836,120467576,120475641,120478040,120487126,120497161,120499058,120506039,	0	Clasp1	cmpl	cmpl	-1,0,0,1,0,2,0,2,1,1,0,0,2,0,2,2,2,2,1,1,1,1,1,1,0,2,0,2,0,0,0,2,2,0,1,0,0,0,0,
chr1	120382040	120382549	MACS_peak_284	50.42	INTRAGENIC	NM_177548	chr1	+	120285634	120506039	120316300	120503571	37	120285634,120316016,120356377,120357763,120359042,120361104,120364456,120368348,120394210,120396224,120397878,120399429,120400396,120401472,120402058,120403516,120405391,120406148,120406782,120408751,120418403,120421873,120435842,120439678,120441969,120444441,120447663,120448589,120456562,120457587,120467425,120475397,120477849,120486997,120496954,120498941,120503484,	120286098,120316495,120356456,120357867,120359134,120361180,120364554,120368416,120394363,120396298,120397971,120399575,120400532,120401543,120402118,120403594,120405559,120406198,120406953,120408799,120418511,120422032,120435946,120439923,120442036,120444605,120447742,120448733,120456706,120457694,120467576,120475641,120478040,120487126,120497161,120499058,120506039,	0	Clasp1	cmpl	cmpl	-1,0,0,1,0,2,0,2,1,1,0,0,2,0,2,2,2,2,1,1,1,1,1,0,2,0,2,0,0,0,2,0,1,0,0,0,0,
chr1	120382040	120382549	MACS_peak_284	50.42	INTRAGENIC	NM_029709	chr1	+	120285634	120506039	120316300	120503571	37	120285634,120316016,120356377,120357763,120359042,120361104,120364456,120368348,120394210,120396224,120397878,120399429,120400396,120401472,120402058,120403516,120405391,120406148,120406782,120418403,120421873,120435842,120438251,120439678,120441969,120444441,120447663,120448589,120456562,120457587,120467425,120475397,120477849,120486997,120496954,120498941,120503484,	120286098,120316495,120356456,120357867,120359134,120361180,120364554,120368416,120394363,120396298,120397971,120399575,120400532,120401543,120402118,120403594,120405559,120406198,120406953,120418511,120422032,120435946,120438275,120439923,120442036,120444605,120447742,120448733,120456706,120457694,120467576,120475641,120478040,120487126,120497161,120499058,120506039,	0	Clasp1	cmpl	cmpl	-1,0,0,1,0,2,0,2,1,1,0,0,2,0,2,2,2,2,1,1,1,1,0,0,2,0,2,0,0,0,2,0,1,0,0,0,0,
chr1	120736059	120736694	MACS_peak_285	54.43	NONE
chr1	120769799	120770827	MACS_peak_286	271.62	NONE
chr1	120930282	120930890	MACS_peak_287	79.01	TSS	NM_001081125	chr1	-	120730637	120950196	120732361	120898752	14	120730637,120736830,120738492,120740927,120742493,120744959,120749834,120751017,120752012,120763148,120764555,120786872,120898616,120949878,	120734754,120737167,120738774,120741092,120742643,120745094,120749957,120751234,120752214,120763334,120764758,120786978,120898783,120950196,	0	Gli2	cmpl	cmpl	1,0,0,0,0,0,0,2,1,1,2,1,0,-1,
chr1	121493155	121493787	MACS_peak_288	109.24	NONE
chr1	121520989	121521697	MACS_peak_289	55.76	NONE
chr1	122001981	122002596	MACS_peak_290	63.16	UPSTREAM	NM_028439	chr1	+	122017763	122084766	122047191	122084694	6	122017763,122047179,122057182,122062711,122067977,122084617,	122017794,122047324,122057233,122062749,122068059,122084766,	0	3110009E18Rik	cmpl	cmpl	-1,0,1,1,0,1,
chr1	122001981	122002596	MACS_peak_290	63.16	UPSTREAM	NM_001172074	chr1	+	122017763	122084766	122047191	122084761	5	122017763,122047179,122057182,122062711,122084617,	122018387,122047324,122057233,122062749,122084766,	0	3110009E18Rik	cmpl	cmpl	-1,0,1,1,0,
chr1	122001981	122002596	MACS_peak_290	63.16	DOWNSTREAM	NM_001037999	chr1	-	122009856	122017496	122010036	122017491	4	122009856,122012962,122016471,122017338,	122010110,122013025,122016589,122017496,	0	Dbi	cmpl	cmpl	1,1,0,0,
chr1	122001981	122002596	MACS_peak_290	63.16	DOWNSTREAM	NM_007830	chr1	-	122009856	122017673	122010036	122017530	4	122009856,122012962,122016471,122017521,	122010110,122013025,122016589,122017673,	0	Dbi	cmpl	cmpl	1,1,0,0,
chr1	123092466	123093301	MACS_peak_291	95.29	NONE
chr1	127379198	127379867	MACS_peak_292	88.52	NONE
chr1	128898064	128898660	MACS_peak_293	200.55	NONE
chr1	128925682	128926135	MACS_peak_294	55.45	NONE
chr1	129304725	129305235	MACS_peak_295	57.7	INTRAGENIC	NM_145128	chr1	+	129101562	129379549	129203352	129379302	18	129101562,129146366,129203210,129217180,129261724,129262979,129279497,129281344,129283919,129287320,129294083,129308703,129342818,129356412,129365768,129368077,129376041,129379103,	129102004,129146416,129203593,129217342,129261801,129263069,129279569,129281506,129284089,129287455,129294217,129308837,129342968,129356559,129365885,129368152,129376199,129379549,	0	Mgat5	cmpl	cmpl	-1,-1,0,1,1,0,0,0,0,2,2,1,0,0,0,0,0,2,
chr1	130000218	130000551	MACS_peak_296	70.83	TSS	NM_027678	chr1	-	129850762	129998985	129851543	129988580	21	129850762,129853113,129856286,129857335,129860337,129861639,129864454,129869523,129872715,129884573,129889376,129893429,129895917,129912619,129914134,129929425,129932974,129937394,129954558,129988419,129998829,	129851642,129853245,129856677,129857446,129860480,129861741,129864546,129869721,129873121,129884723,129889556,129893549,129896037,129912736,129914306,129929511,129933206,129937573,129954577,129988587,129998985,	0	Zranb3	cmpl	cmpl	0,0,2,2,0,0,1,1,0,0,0,0,0,0,2,0,2,0,2,0,-1,
chr1	130691977	130692657	MACS_peak_297	111.87	NONE
chr1	131379614	131380159	MACS_peak_298	54.62	INTRAGENIC	NM_172485	chr1	+	131169880	132115855	131327407	132114757	28	131169880,131327373,131491946,131509686,131525453,131564390,131574625,131655022,131656845,131672869,131713219,131719168,131812129,131817824,131847966,131999647,132013136,132056150,132059396,132061625,132076928,132085036,132086432,132086707,132089130,132091683,132106817,132114675,	131170177,131327546,131492757,131509935,131525623,131564546,131574823,131655214,131657080,131672985,131713349,131719272,131812324,131818091,131848145,131999781,132013287,132056292,132059512,132061743,132077074,132085196,132086606,132086803,132089213,132091876,132106905,132115855,	0	Thsd7b	cmpl	cmpl	-1,0,1,2,2,1,1,1,1,2,1,2,1,1,1,0,2,0,1,0,1,0,1,1,1,0,1,2,
chr1	131454247	131454807	MACS_peak_299	68.21	INTRAGENIC	NM_172485	chr1	+	131169880	132115855	131327407	132114757	28	131169880,131327373,131491946,131509686,131525453,131564390,131574625,131655022,131656845,131672869,131713219,131719168,131812129,131817824,131847966,131999647,132013136,132056150,132059396,132061625,132076928,132085036,132086432,132086707,132089130,132091683,132106817,132114675,	131170177,131327546,131492757,131509935,131525623,131564546,131574823,131655214,131657080,131672985,131713349,131719272,131812324,131818091,131848145,131999781,132013287,132056292,132059512,132061743,132077074,132085196,132086606,132086803,132089213,132091876,132106905,132115855,	0	Thsd7b	cmpl	cmpl	-1,0,1,2,2,1,1,1,1,2,1,2,1,1,1,0,2,0,1,0,1,0,1,1,1,0,1,2,
chr1	131659133	131659730	MACS_peak_300	57.46	INTRAGENIC	NM_172485	chr1	+	131169880	132115855	131327407	132114757	28	131169880,131327373,131491946,131509686,131525453,131564390,131574625,131655022,131656845,131672869,131713219,131719168,131812129,131817824,131847966,131999647,132013136,132056150,132059396,132061625,132076928,132085036,132086432,132086707,132089130,132091683,132106817,132114675,	131170177,131327546,131492757,131509935,131525623,131564546,131574823,131655214,131657080,131672985,131713349,131719272,131812324,131818091,131848145,131999781,132013287,132056292,132059512,132061743,132077074,132085196,132086606,132086803,132089213,132091876,132106905,132115855,	0	Thsd7b	cmpl	cmpl	-1,0,1,2,2,1,1,1,1,2,1,2,1,1,1,0,2,0,1,0,1,0,1,1,1,0,1,2,
chr1	132252135	132252639	MACS_peak_301	50.84	NONE
chr1	132699454	132700004	MACS_peak_302	77.12	UPSTREAM	NM_011082	chr1	+	132723260	132748826	132731005	132747473	11	132723260,132730949,132738073,132741011,132742903,132743789,132745014,132745567,132746064,132746307,132747377,	132723384,132731048,132738418,132741665,132743236,132744122,132745207,132745695,132746196,132746366,132748826,	0	Pigr	cmpl	cmpl	-1,0,1,1,1,1,1,2,1,1,0,
chr1	132699454	132700004	MACS_peak_302	77.12	TSS	NM_001170632	chr1	+	132697478	132711317	132697526	132711230	7	132697478,132699627,132701119,132707947,132709167,132710570,132711075,	132697565,132699853,132701260,132708286,132709924,132710689,132711317,	0	Fcamr	cmpl	cmpl	0,0,1,1,1,2,1,
chr1	132960622	132961566	MACS_peak_303	317.23	TSS	NM_008551	chr1	-	132950280	132994120	132951668	132994102	10	132950280,132952335,132952505,132952990,132953465,132954070,132954577,132954928,132955199,132993865,	132951812,132952416,132952591,132953115,132953541,132954197,132954657,132954993,132955339,132994120,	0	Mapkapk2	cmpl	cmpl	0,0,1,2,1,0,1,2,0,0,
chr1	133035562	133036275	MACS_peak_304	76.58	UPSTREAM	NM_001136070	chr1	+	133049783	133070048	133049946	133069948	15	133049783,133050805,133051744,133052209,133054768,133056986,133057861,133060096,133060979,133061196,133061696,133062903,133064696,133067513,133069880,	133050002,133050996,133051828,133052300,133054876,133057201,133057979,133060142,133061083,133061346,133061786,133062999,133064817,133067688,133070048,	0	Eif2d	cmpl	cmpl	0,2,1,1,2,2,1,2,0,2,2,2,2,0,1,
chr1	133035562	133036275	MACS_peak_304	76.58	UPSTREAM	NM_010709	chr1	+	133049783	133068811	133049946	133068511	15	133049783,133050805,133051744,133052209,133054768,133056986,133057861,133060096,133060979,133061196,133061696,133062903,133064696,133067513,133068497,	133050002,133050996,133051828,133052300,133054876,133057201,133057979,133060142,133061083,133061346,133061786,133062999,133064817,133067688,133068811,	0	Eif2d	cmpl	cmpl	0,2,1,1,2,2,1,2,0,2,2,2,2,0,1,
chr1	133035562	133036275	MACS_peak_304	76.58	TSS	NM_145508	chr1	-	133025017	133034811	133025250	133034733	3	133025017,133032836,133034656,	133026822,133032948,133034811,	0	Dyrk3	cmpl	cmpl	0,2,0,
chr1	133076670	133077250	MACS_peak_305	66.31	DOWNSTREAM	NM_001136070	chr1	+	133049783	133070048	133049946	133069948	15	133049783,133050805,133051744,133052209,133054768,133056986,133057861,133060096,133060979,133061196,133061696,133062903,133064696,133067513,133069880,	133050002,133050996,133051828,133052300,133054876,133057201,133057979,133060142,133061083,133061346,133061786,133062999,133064817,133067688,133070048,	0	Eif2d	cmpl	cmpl	0,2,1,1,2,2,1,2,0,2,2,2,2,0,1,
chr1	133076670	133077250	MACS_peak_305	66.31	DOWNSTREAM	NM_010709	chr1	+	133049783	133068811	133049946	133068511	15	133049783,133050805,133051744,133052209,133054768,133056986,133057861,133060096,133060979,133061196,133061696,133062903,133064696,133067513,133068497,	133050002,133050996,133051828,133052300,133054876,133057201,133057979,133060142,133061083,133061346,133061786,133062999,133064817,133067688,133068811,	0	Eif2d	cmpl	cmpl	0,2,1,1,2,2,1,2,0,2,2,2,2,0,1,
chr1	133124700	133125491	MACS_peak_306	132.28	TSS	NM_018750	chr1	-	133072986	133141755	133075101	133141707	6	133072986,133077129,133077730,133078720,133108833,133141265,	133075254,133077245,133078028,133078831,133108955,133141755,	0	Rassf5	cmpl	cmpl	0,1,0,0,1,0,
chr1	133586465	133586981	MACS_peak_307	57.16	DOWNSTREAM	NM_007799	chr1	+	133534890	133572084	133558572	133571522	10	133534890,133558452,133559189,133559887,133560860,133564613,133567262,133568780,133569021,133571357,	133535134,133558643,133559346,133560005,133560979,133564813,133567385,133568922,133569120,133572084,	0	Ctse	cmpl	cmpl	-1,0,2,0,1,0,2,2,0,0,
chr1	133586465	133586981	MACS_peak_307	57.16	TSS	NM_145509	chr1	+	133585271	133610041	133593590	133608274	6	133585271,133593575,133594405,133594992,133602172,133608196,	133585412,133593643,133594532,133595208,133602298,133610041,	0	5430435G22Rik	cmpl	cmpl	-1,0,2,0,0,0,
chr1	133723835	133724405	MACS_peak_308	52.56	TSS	NM_173865	chr1	+	133724588	133745440	133727198	133743312	11	133724588,133726587,133735691,133736753,133737431,133737704,133738561,133739525,133740495,133740914,133743126,	133724970,133727567,133735799,133736825,133737576,133737851,133738709,133739605,133740630,133741063,133745440,	0	Slc41a1	cmpl	cmpl	-1,0,0,0,0,1,1,2,1,1,0,
chr1	133807329	133807925	MACS_peak_309	57.54	TSS	NM_175294	chr1	+	133807034	133832898	133807310	133827783	7	133807034,133815581,133818519,133821162,133824640,133826189,133827610,	133807327,133815631,133818625,133821218,133824793,133826339,133832898,	0	Nucks1	cmpl	cmpl	0,2,1,2,1,1,1,
chr1	133924407	133925058	MACS_peak_310	67.34	DOWNSTREAM	NM_001114662	chr1	-	133933359	133964639	133935494	133964469	10	133933359,133937116,133938434,133942882,133948956,133950125,133950635,133954292,133955736,133964239,	133935550,133937237,133938505,133943030,133949130,133950241,133950801,133954544,133955935,133964639,	0	Mfsd4	cmpl	cmpl	1,0,1,0,0,1,0,0,2,0,
chr1	133924407	133925058	MACS_peak_310	67.34	DOWNSTREAM	NM_007923	chr1	+	133904181	133922261	133910968	133920228	5	133904181,133910959,133914169,133915926,133920129,	133904517,133911175,133915039,133916043,133922261,	0	Elk4	cmpl	cmpl	-1,0,0,0,0,
chr1	134189027	134189692	MACS_peak_311	52.19	UPSTREAM	NM_028778	chr1	+	134212701	134230065	134212806	134228958	7	134212701,134221529,134224273,134224707,134226534,134227135,134227897,	134213049,134221650,134224425,134224773,134226654,134227268,134230065,	0	Nuak2	cmpl	cmpl	0,0,1,0,0,0,1,
chr1	134189027	134189692	MACS_peak_311	52.19	UPSTREAM	NM_144810	chr1	+	134195202	134203934	134195853	134201369	5	134195202,134199101,134199516,134200305,134201175,	134196229,134199266,134199732,134200407,134203934,	0	Klhdc8a	cmpl	cmpl	0,1,1,1,1,
chr1	134189027	134189692	MACS_peak_311	52.19	UPSTREAM	NM_001195025	chr1	+	134212701	134230065	134212806	134228958	8	134212701,134221529,134222782,134224273,134224707,134226534,134227135,134227897,	134213049,134221650,134222806,134224425,134224773,134226654,134227268,134230065,	0	Nuak2	cmpl	cmpl	0,0,1,1,0,0,0,1,
chr1	134209326	134209898	MACS_peak_312	59.58	TSS	NM_028778	chr1	+	134212701	134230065	134212806	134228958	7	134212701,134221529,134224273,134224707,134226534,134227135,134227897,	134213049,134221650,134224425,134224773,134226654,134227268,134230065,	0	Nuak2	cmpl	cmpl	0,0,1,0,0,0,1,
chr1	134478711	134479702	MACS_peak_313	110.77	NONE
chr1	134638001	134638572	MACS_peak_314	52.48	TSS	NM_182716	chr1	-	134461266	134638374	134466996	134539345	30	134461266,134470346,134472862,134479571,134480940,134484650,134489927,134492060,134493102,134498547,134500374,134501617,134502060,134503579,134504959,134506333,134506887,134507351,134508106,134515965,134517501,134518088,134528261,134530744,134531200,134533562,134534440,134539254,134562055,134638247,	134467228,134470416,134472994,134479724,134481057,134484887,134489942,134492234,134493225,134498770,134500445,134501815,134502162,134503624,134505084,134506481,134507054,134507463,134508250,134516097,134517686,134518200,134528432,134530867,134531397,134533668,134534458,134539435,134562164,134638374,	0	Nfasc	cmpl	cmpl	2,1,1,1,1,1,1,1,1,0,1,1,1,1,2,1,2,1,1,1,2,1,1,1,2,1,1,0,-1,-1,
chr1	134915845	134917118	MACS_peak_315	261.53	TSS	NM_008575	chr1	-	134886421	134921925	134888232	134915431	12	134886421,134891079,134893139,134897859,134900367,134901230,134905713,134907641,134909213,134915353,134915930,134921824,	134888802,134891160,134893286,134898020,134900467,134901298,134905769,134907775,134909288,134915461,134916008,134921925,	0	Mdm4	cmpl	cmpl	0,0,0,1,0,1,2,0,0,0,-1,-1,
chr1	135128065	135128857	MACS_peak_316	91.79	UPSTREAM	NM_001160268	chr1	+	135142673	135200012	135156631	135195612	23	135142673,135155585,135156618,135160373,135161237,135163142,135166576,135168785,135170434,135176915,135178359,135178693,135179847,135181456,135181823,135184046,135184350,135188928,135190282,135190530,135191139,135195496,135196285,	135142719,135155666,135156733,135160478,135161310,135163243,135166779,135169268,135170951,135176984,135178440,135178843,135179943,135181568,135181963,135184176,135184457,135189105,135190450,135190664,135191285,135195620,135200012,	0	Plekha6	cmpl	cmpl	-1,-1,0,0,0,1,0,2,2,0,0,0,0,0,1,0,1,0,0,0,2,1,-1,
chr1	135128065	135128857	MACS_peak_316	91.79	UPSTREAM	NM_182930	chr1	+	135142673	135200012	135156631	135195612	27	135142673,135155585,135156618,135160373,135161237,135163142,135166636,135168785,135170434,135171369,135172388,135175949,135176915,135178359,135178693,135179847,135181456,135181823,135182823,135184046,135184350,135188928,135190282,135190530,135191139,135195496,135196285,	135142719,135155666,135156733,135160478,135161310,135163243,135166779,135169268,135170951,135171456,135172442,135176030,135176984,135178440,135178843,135179943,135181568,135181963,135182973,135184176,135184457,135189105,135190450,135190664,135191285,135195620,135200012,	0	Plekha6	cmpl	cmpl	-1,-1,0,0,0,1,0,2,2,0,0,0,0,0,0,0,0,1,0,0,1,0,0,0,2,1,-1,
chr1	135128065	135128857	MACS_peak_316	91.79	DOWNSTREAM	NR_037984	chr1	-	135146428	135166385	135166385	135166385	4	135146428,135152684,135155021,135166000,	135147993,135153736,135155131,135166385,	0	Gm19461	unk	unk	-1,-1,-1,-1,
chr1	135203926	135204411	MACS_peak_317	52.49	DOWNSTREAM	NM_001160268	chr1	+	135142673	135200012	135156631	135195612	23	135142673,135155585,135156618,135160373,135161237,135163142,135166576,135168785,135170434,135176915,135178359,135178693,135179847,135181456,135181823,135184046,135184350,135188928,135190282,135190530,135191139,135195496,135196285,	135142719,135155666,135156733,135160478,135161310,135163243,135166779,135169268,135170951,135176984,135178440,135178843,135179943,135181568,135181963,135184176,135184457,135189105,135190450,135190664,135191285,135195620,135200012,	0	Plekha6	cmpl	cmpl	-1,-1,0,0,0,1,0,2,2,0,0,0,0,0,1,0,1,0,0,0,2,1,-1,
chr1	135203926	135204411	MACS_peak_317	52.49	DOWNSTREAM	NM_182930	chr1	+	135142673	135200012	135156631	135195612	27	135142673,135155585,135156618,135160373,135161237,135163142,135166636,135168785,135170434,135171369,135172388,135175949,135176915,135178359,135178693,135179847,135181456,135181823,135182823,135184046,135184350,135188928,135190282,135190530,135191139,135195496,135196285,	135142719,135155666,135156733,135160478,135161310,135163243,135166779,135169268,135170951,135171456,135172442,135176030,135176984,135178440,135178843,135179943,135181568,135181963,135182973,135184176,135184457,135189105,135190450,135190664,135191285,135195620,135200012,	0	Plekha6	cmpl	cmpl	-1,-1,0,0,0,1,0,2,2,0,0,0,0,0,0,0,0,1,0,0,1,0,0,0,2,1,-1,
chr1	135203926	135204411	MACS_peak_317	52.49	TSS	NM_026680	chr1	+	135206399	135219603	135206463	135218227	5	135206399,135215857,135216729,135217567,135218185,	135206488,135215949,135216908,135217631,135219603,	0	Golt1a	cmpl	cmpl	0,1,0,2,0,
chr1	135259701	135260248	MACS_peak_318	54.45	DOWNSTREAM	NM_011439	chr1	-	135278876	135320789	135280227	135289847	14	135278876,135281033,135282042,135282570,135282761,135283342,135283660,135285025,135285505,135285900,135287135,135287305,135289649,135320452,	135280501,135281250,135282186,135282667,135282871,135283505,135283743,135285140,135285574,135286073,135287222,135287417,135289848,135320789,	0	Sox13	cmpl	cmpl	2,1,1,0,1,0,1,0,0,1,1,0,0,-1,
chr1	135259701	135260248	MACS_peak_318	54.45	DOWNSTREAM	NM_031192	chr1	+	135247250	135256896	135247282	135256715	9	135247250,135250703,135251378,135252071,135252961,135254980,135255514,135255910,135256553,	135247374,135250854,135251502,135252190,135253158,135255100,135255659,135256009,135256896,	0	Ren1	cmpl	cmpl	0,2,0,1,0,2,2,0,0,
chr1	135259701	135260248	MACS_peak_318	54.45	DOWNSTREAM	NM_031193	chr1	+	135247142	135256900	135247213	135256715	9	135247142,135250703,135251378,135252071,135252961,135254980,135255514,135255910,135256553,	135247374,135250854,135251502,135252190,135253158,135255100,135255650,135256009,135256900,	0	Ren2	cmpl	cmpl	0,2,0,1,0,2,2,0,0,
chr1	135259701	135260248	MACS_peak_318	54.45	TSS	NM_175443	chr1	+	135260148	135276895	135260340	135275966	8	135260148,135262152,135265326,135269711,135271103,135273482,135275025,135275893,	135260595,135262412,135265449,135269854,135271187,135273628,135275099,135276895,	0	Etnk2	cmpl	cmpl	0,0,2,2,1,1,0,2,
chr1	135560644	135561211	MACS_peak_319	60.02	TSS	NM_001166552	chr1	-	135552455	135557462	135553231	135556174	1	135552455,	135557462,	0	Zbed6	cmpl	cmpl	0,
chr1	135590941	135591526	MACS_peak_320	124.39	TSS	NM_172842	chr1	-	135575605	135586593	135576354	135585483	6	135575605,135579559,135580114,135580582,135585397,135586391,	135577212,135579630,135580219,135580686,135585581,135586593,	0	Lax1	cmpl	cmpl	0,1,1,2,0,-1,
chr1	135591809	135593240	MACS_peak_321	266.36	DOWNSTREAM	NM_001167949	chr1	-	135599250	135650324	135608210	135649858	21	135599250,135608208,135611630,135613081,135614364,135615276,135615900,135623033,135624299,135625273,135626293,135626945,135628239,135628802,135631624,135633192,135634566,135635114,135635739,135636490,135649665,	135603573,135608399,135611807,135613189,135614576,135615490,135616092,135623140,135624387,135625453,135626525,135627187,135628482,135629017,135631786,135633228,135634695,135635240,135635997,135636688,135650324,	0	Atp2b4	cmpl	cmpl	-1,0,0,0,1,0,0,1,0,0,2,0,0,1,1,1,1,1,1,1,0,
chr1	135591809	135593240	MACS_peak_321	266.36	DOWNSTREAM	NM_213616	chr1	-	135599250	135650324	135603267	135649858	20	135599250,135611630,135613081,135614364,135615276,135615900,135623033,135624299,135625273,135626293,135626945,135628239,135628802,135631624,135633192,135634566,135635114,135635739,135636490,135649665,	135603573,135611807,135613189,135614576,135615490,135616092,135623140,135624387,135625453,135626525,135627187,135628482,135629017,135631786,135633228,135634695,135635240,135635997,135636688,135650324,	0	Atp2b4	cmpl	cmpl	0,0,0,1,0,0,1,0,0,2,0,0,1,1,1,1,1,1,1,0,
chr1	135698316	135698746	MACS_peak_322	57.73	NONE
chr1	135861601	135862537	MACS_peak_323	318.84	NONE
chr1	135875160	135875691	MACS_peak_324	55.82	NONE
chr1	135989261	135989840	MACS_peak_325	51.84	UPSTREAM	NM_027979	chr1	+	136007818	136048013	136035324	136047925	12	136007818,136035217,136036836,136039816,136040587,136041828,136042167,136043138,136044912,136045952,136047055,136047680,	136007939,136035349,136036866,136040018,136040644,136041994,136042292,136043262,136045098,136046060,136047182,136048013,	0	Chit1	cmpl	cmpl	-1,0,1,1,2,2,0,2,0,0,0,1,
chr1	135997289	135997857	MACS_peak_326	75.22	UPSTREAM	NM_027979	chr1	+	136007818	136048013	136035324	136047925	12	136007818,136035217,136036836,136039816,136040587,136041828,136042167,136043138,136044912,136045952,136047055,136047680,	136007939,136035349,136036866,136040018,136040644,136041994,136042292,136043262,136045098,136046060,136047182,136048013,	0	Chit1	cmpl	cmpl	-1,0,1,1,2,2,0,2,0,0,0,1,
chr1	136199794	136200295	MACS_peak_327	58.54	DOWNSTREAM	NM_031189	chr1	+	136186580	136189125	136186632	136188372	3	136186580,136187669,136188250,	136187103,136187751,136189125,	0	Myog	cmpl	cmpl	0,0,1,
chr1	136390825	136391467	MACS_peak_328	53.89	DOWNSTREAM	NM_153128	chr1	+	136352131	136387450	136355048	136386035	12	136352131,136355004,136360403,136364227,136368970,136372364,136380323,136382294,136383586,136384220,136385592,136385908,	136352242,136355243,136360557,136364445,136369120,136372479,136380430,136382490,136383745,136384319,136385698,136387450,	0	Klhl12	cmpl	cmpl	-1,0,0,1,0,0,1,0,1,1,1,2,
chr1	136390825	136391467	MACS_peak_328	53.89	TSS	NM_145510	chr1	+	136391236	136404461	136391260	136402898	2	136391236,136402652,	136391386,136404461,	0	Rabif	cmpl	cmpl	0,0,
chr1	136929280	136929941	MACS_peak_329	73.86	NONE
chr1	136966389	136967047	MACS_peak_330	150.43	NONE
chr1	137045073	137045681	MACS_peak_331	56.56	DOWNSTREAM	NM_134438	chr1	-	137056826	137064258	137057456	137064081	2	137056826,137063451,	137058272,137064258,	0	Gpr37l1	cmpl	cmpl	0,0,
chr1	137045073	137045681	MACS_peak_331	56.56	DOWNSTREAM	NM_177081	chr1	+	137029301	137041897	137030378	137039831	10	137029301,137030326,137031016,137031407,137032675,137033900,137034344,137035700,137038519,137039737,	137029367,137030500,137031200,137031492,137032752,137034038,137034455,137035855,137038633,137041897,	0	Ptpn7	cmpl	cmpl	-1,0,2,0,1,0,0,0,2,2,
chr1	137045073	137045681	MACS_peak_331	56.56	TSS	NM_026823	chr1	+	137043410	137052845	137043554	137051848	7	137043410,137049047,137049369,137050752,137050984,137051289,137051798,	137043677,137049128,137049443,137050846,137051052,137051360,137052845,	0	Arl8a	cmpl	cmpl	0,0,0,2,0,2,1,
chr1	137594850	137595440	MACS_peak_332	50.99	NONE
chr1	137662370	137663788	MACS_peak_333	138.59	TSS	NM_013750	chr1	+	137662661	137665711	137663025	137663403	2	137662661,137665054,	137663471,137665711,	0	Phlda3	cmpl	cmpl	0,-1,
chr1	137787363	137788071	MACS_peak_334	62.6	NONE
chr1	137947896	137948523	MACS_peak_335	62.13	TSS	NM_001081023	chr1	+	137949477	138016399	137949477	138015707	44	137949477,137951155,137965497,137967210,137967486,137970083,137971643,137973303,137974205,137976055,137980791,137981868,137983260,137983900,137984879,137985596,137988274,137989163,137989836,137991457,137992039,137992346,137993654,137993941,137994748,137995108,137997176,137998055,138001146,138002024,138002360,138002978,138003593,138004656,138007442,138008554,138009486,138009859,138011724,138012501…	137949629,137951261,137965637,137967353,137967639,137970289,137971747,137973449,137974287,137976216,137981017,137982076,137983381,137984015,137984973,137985666,137988407,137989293,137989896,137991564,137992127,137992454,137993707,137994088,137994950,137995267,137997287,137998139,138001203,138002153,138002426,138003070,138003753,138004784,138007539,138008657,138009588,138009984,138011853,138012752…	0	Cacna1s	cmpl	cmpl	0,2,0,2,1,1,0,2,1,2,1,2,0,1,2,0,1,2,0,0,2,0,0,2,2,0,0,0,0,0,0,0,2,0,2,0,1,1,0,0,2,1,0,0,
chr1	138066633	138067443	MACS_peak_336	113.49	INTRAGENIC	NM_001039472	chr1	+	138027977	138074591	138028298	138070668	35	138027977,138041175,138041706,138044074,138044310,138044783,138045202,138045837,138047707,138048619,138048773,138049334,138049769,138050680,138052673,138054039,138054857,138055820,138056214,138056589,138056880,138057982,138058305,138058540,138059363,138059649,138061594,138063738,138065763,138066565,138067718,138068164,138068735,138069379,138070613,	138028339,138041398,138041889,138044224,138044445,138044954,138045318,138046033,138047897,138048683,138048992,138049416,138049887,138050872,138052873,138054147,138054926,138056053,138056362,138056784,138056982,138058148,138058357,138058598,138059569,138059727,138061708,138063777,138065900,138066746,138067883,138068282,138068906,138069579,138074591,	0	Kif21b	cmpl	cmpl	0,2,0,0,0,0,0,2,0,1,2,2,0,1,1,0,0,0,2,0,0,0,1,2,0,2,2,2,2,1,2,2,0,0,2,
chr1	138120101	138120701	MACS_peak_337	57.21	NONE
chr1	138126748	138127352	MACS_peak_338	56.88	TSS	NM_028872	chr1	-	138110098	138130857	138110902	138130682	10	138110098,138112332,138116299,138116707,138117648,138121912,138122728,138123356,138124090,138130479,	138110995,138113017,138116473,138116918,138117702,138122135,138122845,138123481,138124239,138130857,	0	5730559C18Rik	cmpl	cmpl	0,2,2,1,1,0,0,1,2,0,
chr1	138252107	138252678	MACS_peak_339	52.48	NONE
chr1	138447411	138448306	MACS_peak_340	145.02	DOWNSTREAM	NM_001081258	chr1	+	138364534	138428088	138364534	138424193	30	138364534,138365496,138367896,138369961,138372916,138374935,138375720,138376384,138378964,138379500,138382848,138383611,138383980,138386776,138391204,138392432,138393146,138393939,138396593,138399223,138399886,138406721,138410310,138412430,138412836,138416205,138417766,138422358,138423351,138423822,	138365346,138365751,138368151,138370049,138373015,138374988,138375751,138376492,138379081,138379616,138383021,138383759,138384044,138386961,138391307,138392596,138393294,138394092,138396720,138399317,138400016,138406822,138410399,138412655,138413018,138416361,138417886,138422433,138423484,138428088,	0	Kif14	cmpl	cmpl	0,2,2,2,0,0,2,0,0,0,2,1,2,0,2,0,2,0,0,1,2,0,2,1,1,0,0,0,0,1,
chr1	138521053	138521610	MACS_peak_341	53.61	TSS	NM_177643	chr1	+	138521477	138526968	138521862	138524544	2	138521477,138521848,	138521628,138526968,	0	Zfp281	cmpl	cmpl	-1,0,
chr1	138557542	138558384	MACS_peak_342	53.12	UPSTREAM	NR_045324	chr1	+	138579972	138587382	138587382	138587382	3	138579972,138585320,138587113,	138580050,138585387,138587382,	0	Gm19705	unk	unk	-1,-1,-1,
chr1	138557542	138558384	MACS_peak_342	53.12	UPSTREAM	NR_045325	chr1	+	138580205	138587382	138587382	138587382	3	138580205,138585320,138587113,	138580280,138585387,138587382,	0	Gm19705	unk	unk	-1,-1,-1,
chr1	138678155	138678823	MACS_peak_343	104.9	NONE
chr1	139484017	139484565	MACS_peak_344	77.33	NONE
chr1	139823926	139825201	MACS_peak_345	191.87	NONE
chr1	140391652	140391966	MACS_peak_346	193.23	NONE
chr1	142852541	142853007	MACS_peak_347	54.22	NONE
chr1	144171686	144172337	MACS_peak_348	53.22	NONE
chr1	145407039	145407607	MACS_peak_349	185.46	NONE
chr1	145443954	145444649	MACS_peak_350	85.87	DOWNSTREAM	NM_145991	chr1	-	145454628	145549814	145455650	145549754	17	145454628,145456499,145462432,145464408,145474631,145474975,145482161,145514754,145517119,145518459,145524768,145533052,145538404,145538543,145542522,145546346,145549623,	145455687,145456641,145462533,145464570,145474719,145475011,145482219,145514819,145517198,145518558,145524985,145533141,145538457,145538606,145542592,145546452,145549814,	0	Cdc73	cmpl	cmpl	2,1,2,2,1,1,0,1,0,0,2,0,1,1,0,2,0,
chr1	145577917	145578677	MACS_peak_351	79.76	UPSTREAM	NM_001038592	chr1	+	145586697	145596808	145586790	145593769	4	145586697,145588777,145592176,145593637,	145586888,145588841,145592353,145596808,	0	Glrx2	cmpl	cmpl	0,2,0,0,
chr1	145577917	145578677	MACS_peak_351	79.76	UPSTREAM	NM_001038593	chr1	+	145586478	145596808	145588778	145593769	4	145586478,145588777,145592176,145593637,	145586572,145588841,145592353,145596808,	0	Glrx2	cmpl	cmpl	-1,0,0,0,
chr1	145577917	145578677	MACS_peak_351	79.76	UPSTREAM	NM_023505	chr1	+	145586744	145596808	145588778	145593769	4	145586744,145588777,145592176,145593637,	145586814,145588841,145592353,145596808,	0	Glrx2	cmpl	cmpl	-1,0,0,0,
chr1	145577917	145578677	MACS_peak_351	79.76	DOWNSTREAM	NM_013835	chr1	-	145597920	145624181	145604871	145618135	9	145597920,145607072,145607482,145608399,145612562,145612903,145613719,145617555,145624050,	145605024,145607219,145607596,145608516,145612700,145613050,145613940,145618156,145624181,	0	Trove2	cmpl	cmpl	0,0,0,0,0,0,1,0,-1,
chr1	145577917	145578677	MACS_peak_351	79.76	UPSTREAM	NM_001038594	chr1	+	145587576	145596808	145588778	145593769	4	145587576,145588777,145592176,145593637,	145587609,145588841,145592353,145596808,	0	Glrx2	cmpl	cmpl	-1,0,0,0,
chr1	145600913	145601494	MACS_peak_352	203.58	UPSTREAM	NM_001159866	chr1	+	145624407	145654596	145624530	145653858	11	145624407,145631095,145633259,145641406,145641612,145641809,145643891,145645520,145647053,145649264,145653813,	145624606,145631159,145633365,145641532,145641674,145641940,145643955,145645623,145647164,145649363,145654596,	0	Uchl5	cmpl	cmpl	0,1,2,0,0,2,1,2,0,0,0,
chr1	145600913	145601494	MACS_peak_352	203.58	DOWNSTREAM	NM_001038592	chr1	+	145586697	145596808	145586790	145593769	4	145586697,145588777,145592176,145593637,	145586888,145588841,145592353,145596808,	0	Glrx2	cmpl	cmpl	0,2,0,0,
chr1	145600913	145601494	MACS_peak_352	203.58	DOWNSTREAM	NM_001038593	chr1	+	145586478	145596808	145588778	145593769	4	145586478,145588777,145592176,145593637,	145586572,145588841,145592353,145596808,	0	Glrx2	cmpl	cmpl	-1,0,0,0,
chr1	145600913	145601494	MACS_peak_352	203.58	DOWNSTREAM	NM_023505	chr1	+	145586744	145596808	145588778	145593769	4	145586744,145588777,145592176,145593637,	145586814,145588841,145592353,145596808,	0	Glrx2	cmpl	cmpl	-1,0,0,0,
chr1	145600913	145601494	MACS_peak_352	203.58	UPSTREAM	NM_019562	chr1	+	145624407	145654596	145624530	145653858	11	145624407,145631095,145633259,145641406,145641612,145641809,145643891,145645520,145647050,145649264,145653813,	145624606,145631159,145633365,145641532,145641674,145641940,145643955,145645623,145647164,145649363,145654596,	0	Uchl5	cmpl	cmpl	0,1,2,0,0,2,1,2,0,0,0,
chr1	145600913	145601494	MACS_peak_352	203.58	DOWNSTREAM	NM_001038594	chr1	+	145587576	145596808	145588778	145593769	4	145587576,145588777,145592176,145593637,	145587609,145588841,145592353,145596808,	0	Glrx2	cmpl	cmpl	-1,0,0,0,
chr1	145665834	145666482	MACS_peak_353	60.39	DOWNSTREAM	NM_001159866	chr1	+	145624407	145654596	145624530	145653858	11	145624407,145631095,145633259,145641406,145641612,145641809,145643891,145645520,145647053,145649264,145653813,	145624606,145631159,145633365,145641532,145641674,145641940,145643955,145645623,145647164,145649363,145654596,	0	Uchl5	cmpl	cmpl	0,1,2,0,0,2,1,2,0,0,0,
chr1	145665834	145666482	MACS_peak_353	60.39	DOWNSTREAM	NM_019562	chr1	+	145624407	145654596	145624530	145653858	11	145624407,145631095,145633259,145641406,145641612,145641809,145643891,145645520,145647050,145649264,145653813,	145624606,145631159,145633365,145641532,145641674,145641940,145643955,145645623,145647164,145649363,145654596,	0	Uchl5	cmpl	cmpl	0,1,2,0,0,2,1,2,0,0,0,
chr1	145877683	145878379	MACS_peak_354	78.14	NONE
chr1	146152945	146153836	MACS_peak_355	90.18	NONE
chr1	152239546	152240386	MACS_peak_356	102.46	TSS	NM_001077237	chr1	-	152208440	152240185	152209950	152237464	13	152208440,152210620,152219158,152221924,152222625,152227441,152229397,152230187,152231558,152233487,152235652,152237365,152239819,	152210018,152210728,152219329,152222015,152222754,152227507,152229538,152230224,152231665,152233583,152235787,152237486,152240185,	0	BC003331	cmpl	cmpl	1,1,1,0,0,0,0,2,0,0,0,0,-1,
chr1	152327880	152328363	MACS_peak_357	52.67	NONE
chr1	152606345	152607108	MACS_peak_358	79.49	NONE
chr1	152900453	152900945	MACS_peak_359	75.35	NONE
chr1	153856048	153856575	MACS_peak_360	56.17	TSS	NM_197990	chr1	-	153731653	153937450	153740523	153853768	6	153731653,153762611,153768176,153827555,153853674,153937061,	153740562,153762672,153768253,153827650,153853897,153937450,	0	1700025G04Rik	cmpl	cmpl	0,2,0,1,0,-1,
chr1	154408293	154408829	MACS_peak_361	62.85	NONE
chr1	154981204	154982019	MACS_peak_362	230.25	DOWNSTREAM	NM_175460	chr1	+	154802230	154966391	154802238	154962800	11	154802230,154920926,154921802,154924038,154933466,154935913,154937626,154941166,154959271,154959509,154962697,	154802323,154921015,154921870,154924117,154933593,154935994,154937671,154941243,154959373,154959577,154966391,	0	Nmnat2	cmpl	cmpl	0,1,0,2,0,1,1,1,0,0,2,
chr1	155019557	155020328	MACS_peak_363	86.2	NONE
chr1	155021859	155022390	MACS_peak_364	87.52	NONE
chr1	155048138	155048717	MACS_peak_365	51.84	DOWNSTREAM	NM_010683	chr1	-	155066051	155179916	155068602	155179669	28	155066051,155070788,155073513,155074640,155075864,155076171,155077851,155078863,155080614,155081577,155086384,155087446,155089006,155089758,155090360,155094067,155094366,155096169,155096694,155096974,155097516,155097741,155098206,155099081,155102318,155105205,155109519,155179257,	155068859,155070888,155073672,155074840,155075979,155076321,155077996,155079001,155080694,155081783,155086541,155087625,155089149,155089912,155090606,155094256,155094588,155096282,155096884,155097097,155097653,155097840,155098324,155099270,155102485,155105336,155109824,155179916,	0	Lamc1	cmpl	cmpl	1,0,0,1,0,0,2,2,0,1,0,1,2,1,1,1,1,2,1,1,2,2,1,1,2,0,1,0,
chr1	155105133	155105721	MACS_peak_366	65.57	NONE
chr1	155133220	155133966	MACS_peak_367	183.73	TSS	NM_010683	chr1	-	155066051	155179916	155068602	155179669	28	155066051,155070788,155073513,155074640,155075864,155076171,155077851,155078863,155080614,155081577,155086384,155087446,155089006,155089758,155090360,155094067,155094366,155096169,155096694,155096974,155097516,155097741,155098206,155099081,155102318,155105205,155109519,155179257,	155068859,155070888,155073672,155074840,155075979,155076321,155077996,155079001,155080694,155081783,155086541,155087625,155089149,155089912,155090606,155094256,155094588,155096282,155096884,155097097,155097653,155097840,155098324,155099270,155102485,155105336,155109824,155179916,	0	Lamc1	cmpl	cmpl	1,0,0,1,0,0,2,2,0,1,0,1,2,1,1,1,1,2,1,1,2,2,1,1,2,0,1,0,
chr1	155389908	155390539	MACS_peak_368	100.88	NONE
chr1	155460003	155460579	MACS_peak_369	52.08	NONE
chr1	155746509	155747298	MACS_peak_370	77.23	TSS	NM_008131	chr1	+	155747074	155756844	155750076	155755312	7	155747074,155750063,155751666,155753478,155754149,155754415,155754993,	155747189,155750242,155751828,155753625,155754277,155754615,155756844,	0	Glul	cmpl	cmpl	-1,0,1,1,1,0,2,
chr1	155747328	155747800	MACS_peak_371	53.66	TSS	NM_008131	chr1	+	155747074	155756844	155750076	155755312	7	155747074,155750063,155751666,155753478,155754149,155754415,155754993,	155747189,155750242,155751828,155753625,155754277,155754615,155756844,	0	Glul	cmpl	cmpl	-1,0,1,1,1,0,2,
chr1	155907695	155908250	MACS_peak_372	53.78	NONE
chr1	155924158	155924840	MACS_peak_373	64.7	NONE
chr1	155997984	155998566	MACS_peak_374	73.8	NONE
chr1	156003939	156004798	MACS_peak_375	58.33	NONE
chr1	156106360	156106896	MACS_peak_376	55.39	TSS	NR_040629	chr1	-	156088650	156104036	156104036	156104036	4	156088650,156101405,156103169,156103732,	156088830,156101461,156103242,156104036,	0	4930452N14Rik	unk	unk	-1,-1,-1,-1,
chr1	156553371	156553930	MACS_peak_377	60.73	TSS	NM_009782	chr1	-	156239648	156573050	156245522	156573049	47	156239648,156249112,156250807,156254841,156259193,156259572,156260180,156261105,156263190,156268157,156272966,156273655,156279560,156283547,156284396,156288624,156289261,156290930,156292001,156292629,156295975,156297975,156312848,156314075,156314813,156316075,156318467,156319189,156320986,156324895,156326380,156328681,156329680,156330204,156330646,156332792,156333627,156335173,156335914,156340431…	156246065,156249303,156250988,156254953,156259300,156259673,156260288,156261211,156263287,156268285,156273132,156273747,156279626,156283673,156284480,156288735,156289426,156291132,156292139,156292790,156296072,156297987,156312955,156314135,156314943,156316238,156318781,156319843,156321043,156324993,156326448,156328799,156329753,156330336,156330759,156332905,156333837,156335263,156335968,156340547…	0	Cacna1e	cmpl	cmpl	0,1,0,2,0,1,1,0,2,0,2,0,0,0,0,0,0,2,2,0,2,2,0,0,2,1,2,2,2,0,1,0,2,2,0,1,1,1,1,2,0,1,1,2,0,2,0,
chr1	156903012	156903896	MACS_peak_378	105.83	NONE
chr1	157058978	157059525	MACS_peak_379	54.45	DOWNSTREAM	NM_021433	chr1	+	157005832	157050647	157006022	157049146	8	157005832,157021115,157024983,157034907,157038558,157040348,157044470,157049069,	157006057,157021285,157025078,157034970,157038684,157040455,157044565,157050647,	0	Stx6	cmpl	cmpl	0,2,1,0,0,0,2,1,
chr1	157084509	157085148	MACS_peak_380	61.13	NONE
chr1	157883019	157883742	MACS_peak_381	54.68	TSS	NM_001160180	chr1	+	157882856	157900866	157899007	157899403	3	157882856,157888204,157898423,	157883050,157888264,157900866,	0	Tor1aip2	cmpl	cmpl	-1,-1,0,
chr1	158102846	158103367	MACS_peak_382	56.71	TSS	NM_177838	chr1	-	157923095	158135156	157926026	157927174	5	157923095,157927081,157928521,157934918,158134959,	157926440,157927301,157928543,157935016,158135156,	0	Fam163a	cmpl	cmpl	0,0,-1,-1,-1,
chr1	158256663	158257434	MACS_peak_383	71.59	INTRAGENIC	NM_130456	chr1	+	158240865	158258166	158240918	158256269	8	158240865,158243105,158246942,158248818,158251014,158253867,158255067,158255990,	158241198,158243209,158247015,158248901,158251218,158253923,158255146,158258166,	0	Nphs2	cmpl	cmpl	0,1,0,1,0,0,2,0,
chr1	158520386	158521073	MACS_peak_384	298.49	TSS	NM_009595	chr1	+	158488917	158579750	158489179	158572847	12	158488917,158550969,158552615,158555418,158559983,158561475,158563210,158563883,158565195,158566948,158570569,158571123,	158489336,158551032,158552786,158555714,158560256,158561560,158563388,158564068,158565348,158567038,158570743,158579750,	0	Abl2	cmpl	cmpl	0,1,1,1,0,0,1,2,1,1,1,1,
chr1	158547111	158547684	MACS_peak_385	135.42	TSS	NM_009595	chr1	+	158488917	158579750	158489179	158572847	12	158488917,158550969,158552615,158555418,158559983,158561475,158563210,158563883,158565195,158566948,158570569,158571123,	158489336,158551032,158552786,158555714,158560256,158561560,158563388,158564068,158565348,158567038,158570743,158579750,	0	Abl2	cmpl	cmpl	0,1,1,1,0,0,1,2,1,1,1,1,
chr1	158590182	158590893	MACS_peak_386	100.05	DOWNSTREAM	NM_009595	chr1	+	158488917	158579750	158489179	158572847	12	158488917,158550969,158552615,158555418,158559983,158561475,158563210,158563883,158565195,158566948,158570569,158571123,	158489336,158551032,158552786,158555714,158560256,158561560,158563388,158564068,158565348,158567038,158570743,158579750,	0	Abl2	cmpl	cmpl	0,1,1,1,0,0,1,2,1,1,1,1,
chr1	158590182	158590893	MACS_peak_386	100.05	DOWNSTREAM	NM_001136104	chr1	+	158488917	158579750	158489179	158572847	13	158488917,158550969,158552615,158555418,158559983,158561475,158563210,158563883,158565195,158566948,158570569,158571123,158571672,	158489336,158551032,158552786,158555714,158560256,158561560,158563388,158564068,158565348,158567038,158570743,158571360,158579750,	0	Abl2	cmpl	cmpl	0,1,1,1,0,0,1,2,1,1,1,1,1,
chr1	158590182	158590893	MACS_peak_386	100.05	DOWNSTREAM	NM_145413	chr1	-	158608701	158649041	158611541	158636175	8	158608701,158616321,158617486,158620607,158628857,158632529,158635798,158648996,	158611773,158616381,158617678,158620779,158628967,158632616,158636298,158649041,	0	Fam20b	cmpl	cmpl	2,2,2,1,2,2,0,-1,
chr1	158640612	158641522	MACS_peak_387	143.22	TSS	NM_145413	chr1	-	158608701	158649041	158611541	158636175	8	158608701,158616321,158617486,158620607,158628857,158632529,158635798,158648996,	158611773,158616381,158617678,158620779,158628967,158632616,158636298,158649041,	0	Fam20b	cmpl	cmpl	2,2,2,1,2,2,0,-1,
chr1	158649054	158649562	MACS_peak_388	65.58	TSS	NM_145413	chr1	-	158608701	158649041	158611541	158636175	8	158608701,158616321,158617486,158620607,158628857,158632529,158635798,158648996,	158611773,158616381,158617678,158620779,158628967,158632616,158636298,158649041,	0	Fam20b	cmpl	cmpl	2,2,2,1,2,2,0,-1,
chr1	158844817	158845730	MACS_peak_389	159.85	TSS	NM_001159966	chr1	-	158734296	158869518	158739294	158837826	20	158734296,158741575,158743568,158747871,158749943,158751517,158754121,158758270,158759102,158760515,158762795,158763025,158799571,158814663,158817221,158818077,158830716,158831916,158837769,158869482,	158739324,158741667,158743674,158747964,158750049,158751595,158754176,158758422,158759259,158760583,158762886,158763163,158799698,158814756,158817311,158818161,158830767,158832021,158837909,158869518,	0	Ralgps2	cmpl	cmpl	0,1,0,0,2,2,1,2,1,2,1,1,0,0,0,0,0,0,0,-1,
chr1	158995592	158996570	MACS_peak_390	104.49	NONE
chr1	159250576	159251101	MACS_peak_391	79.87	TSS	NM_177644	chr1	-	159065313	159342726	159070841	159342069	18	159065313,159076320,159077760,159079903,159087036,159088789,159091255,159093833,159094737,159104273,159105793,159107776,159109229,159122877,159160169,159216861,159229267,159341867,	159071006,159076408,159077963,159080038,159087898,159088989,159091457,159094070,159094882,159104418,159106348,159107875,159109383,159122987,159160276,159216985,159229395,159342726,	0	Rasal2	cmpl	cmpl	0,2,0,0,2,0,2,2,1,0,0,0,2,0,1,0,1,0,
chr1	159389784	159390618	MACS_peak_392	135.51	INTRAGENIC	NM_001033284	chr1	+	159388712	159418864	159388726	159418642	10	159388712,159388874,159392083,159394539,159395095,159395842,159397296,159400746,159402318,159418573,	159388776,159388983,159392180,159394598,159395161,159395952,159397378,159400928,159402547,159418864,	0	BC026585	cmpl	cmpl	0,2,0,1,0,0,2,0,2,0,
chr1	159466493	159467186	MACS_peak_393	93.95	INTRAGENIC	NM_033354	chr1	+	159436926	159498555	159459354	159497478	28	159436926,159437516,159454915,159459294,159461410,159462183,159463209,159464759,159465491,159465982,159467648,159468243,159473996,159476329,159481137,159483063,159484877,159486895,159488165,159489579,159490813,159491646,159494577,159494891,159495551,159495783,159496758,159497406,	159436991,159437684,159454984,159459635,159461523,159462304,159463309,159464904,159465643,159466044,159467784,159468474,159474094,159476411,159481255,159483175,159484983,159487036,159488279,159489652,159491107,159491714,159494727,159494990,159495660,159495863,159496857,159498555,	0	Sec16b	cmpl	cmpl	-1,-1,-1,0,2,1,2,0,1,0,2,0,0,2,0,1,2,0,0,0,1,1,0,0,0,1,0,0,
chr1	159466493	159467186	MACS_peak_393	93.95	INTRAGENIC	NR_027641	chr1	+	159436926	159498555	159498555	159498555	27	159436926,159454915,159459294,159461410,159462183,159463209,159464759,159465491,159465982,159467648,159468243,159473996,159476329,159481137,159483063,159484877,159486895,159488165,159489579,159490813,159491646,159494577,159494891,159495551,159495783,159496758,159497406,	159436991,159454984,159459635,159461523,159462304,159463309,159464904,159465643,159466044,159467784,159468474,159474094,159476411,159481255,159483175,159484983,159487036,159488279,159489652,159491107,159491714,159494727,159494990,159495660,159495863,159496857,159498555,	0	Sec16b	unk	unk	-1,-1,-1,-1,-1,-1,-1,-1,-1,-1,-1,-1,-1,-1,-1,-1,-1,-1,-1,-1,-1,-1,-1,-1,-1,-1,-1,
chr1	159466493	159467186	MACS_peak_393	93.95	INTRAGENIC	NM_001159986	chr1	+	159456300	159498555	159459354	159497478	26	159456300,159459294,159461410,159462183,159463209,159464759,159465491,159465982,159467648,159468243,159473996,159476329,159481137,159483063,159484877,159486895,159488165,159489579,159490813,159491646,159494577,159494891,159495551,159495783,159496758,159497406,	159456355,159459635,159461523,159462304,159463309,159464904,159465643,159466044,159467784,159468474,159474094,159476411,159481255,159483175,159484983,159487036,159488279,159489652,159491107,159491714,159494727,159494990,159495660,159495863,159496857,159498555,	0	Sec16b	cmpl	cmpl	-1,0,2,1,2,0,1,0,2,0,0,2,0,1,2,0,0,0,1,1,0,0,0,1,0,0,
chr1	159521917	159522545	MACS_peak_394	174.44	DOWNSTREAM	NM_033354	chr1	+	159436926	159498555	159459354	159497478	28	159436926,159437516,159454915,159459294,159461410,159462183,159463209,159464759,159465491,159465982,159467648,159468243,159473996,159476329,159481137,159483063,159484877,159486895,159488165,159489579,159490813,159491646,159494577,159494891,159495551,159495783,159496758,159497406,	159436991,159437684,159454984,159459635,159461523,159462304,159463309,159464904,159465643,159466044,159467784,159468474,159474094,159476411,159481255,159483175,159484983,159487036,159488279,159489652,159491107,159491714,159494727,159494990,159495660,159495863,159496857,159498555,	0	Sec16b	cmpl	cmpl	-1,-1,-1,0,2,1,2,0,1,0,2,0,0,2,0,1,2,0,0,0,1,1,0,0,0,1,0,0,
chr1	159521917	159522545	MACS_peak_394	174.44	DOWNSTREAM	NR_027641	chr1	+	159436926	159498555	159498555	159498555	27	159436926,159454915,159459294,159461410,159462183,159463209,159464759,159465491,159465982,159467648,159468243,159473996,159476329,159481137,159483063,159484877,159486895,159488165,159489579,159490813,159491646,159494577,159494891,159495551,159495783,159496758,159497406,	159436991,159454984,159459635,159461523,159462304,159463309,159464904,159465643,159466044,159467784,159468474,159474094,159476411,159481255,159483175,159484983,159487036,159488279,159489652,159491107,159491714,159494727,159494990,159495660,159495863,159496857,159498555,	0	Sec16b	unk	unk	-1,-1,-1,-1,-1,-1,-1,-1,-1,-1,-1,-1,-1,-1,-1,-1,-1,-1,-1,-1,-1,-1,-1,-1,-1,-1,-1,
chr1	159521917	159522545	MACS_peak_394	174.44	DOWNSTREAM	NM_001159986	chr1	+	159456300	159498555	159459354	159497478	26	159456300,159459294,159461410,159462183,159463209,159464759,159465491,159465982,159467648,159468243,159473996,159476329,159481137,159483063,159484877,159486895,159488165,159489579,159490813,159491646,159494577,159494891,159495551,159495783,159496758,159497406,	159456355,159459635,159461523,159462304,159463309,159464904,159465643,159466044,159467784,159468474,159474094,159476411,159481255,159483175,159484983,159487036,159488279,159489652,159491107,159491714,159494727,159494990,159495660,159495863,159496857,159498555,	0	Sec16b	cmpl	cmpl	-1,0,2,1,2,0,1,0,2,0,0,2,0,1,2,0,0,0,1,1,0,0,0,1,0,0,
chr1	160131955	160132450	MACS_peak_395	59.11	NONE
chr1	160290610	160291156	MACS_peak_396	61.92	TSS	NM_007495	chr1	+	160292434	160621917	160292713	160618881	23	160292434,160402505,160432178,160434333,160435492,160439976,160441085,160450574,160503082,160509711,160510341,160527287,160530445,160532067,160539381,160542476,160587170,160594125,160597612,160598758,160604710,160614207,160618643,	160292996,160402693,160432572,160434480,160435600,160440126,160441253,160450659,160503157,160509849,160510492,160527454,160530640,160532195,160539486,160542665,160587439,160594259,160597764,160598894,160604811,160614391,160621917,	0	Astn1	cmpl	cmpl	0,1,0,1,1,1,1,1,2,2,2,0,2,2,1,1,1,0,2,1,2,1,2,
chr1	161155364	161156067	MACS_peak_397	56.13	UPSTREAM	NM_011931	chr1	+	161162456	161277711	161162568	161274969	20	161162456,161169692,161174719,161179332,161180153,161182678,161196887,161198239,161208219,161214678,161219035,161236703,161238540,161239013,161249854,161255047,161257207,161258732,161272937,161274951,	161162981,161169752,161174817,161179409,161180273,161182747,161196947,161198316,161208277,161214793,161219171,161236847,161238649,161239095,161249971,161255165,161257332,161258893,161272982,161277711,	0	Rfwd2	cmpl	cmpl	0,2,2,1,0,0,0,0,2,0,1,2,2,0,1,1,2,1,0,0,
chr1	161161900	161162595	MACS_peak_398	70.81	TSS	NM_011931	chr1	+	161162456	161277711	161162568	161274969	20	161162456,161169692,161174719,161179332,161180153,161182678,161196887,161198239,161208219,161214678,161219035,161236703,161238540,161239013,161249854,161255047,161257207,161258732,161272937,161274951,	161162981,161169752,161174817,161179409,161180273,161182747,161196947,161198316,161208277,161214793,161219171,161236847,161238649,161239095,161249971,161255165,161257332,161258893,161272982,161277711,	0	Rfwd2	cmpl	cmpl	0,2,2,1,0,0,0,0,2,0,1,2,2,0,1,1,2,1,0,0,
chr1	161440713	161441166	MACS_peak_399	63.32	UPSTREAM	NM_022312	chr1	+	161453899	161855053	161780177	161854344	23	161453899,161667641,161780116,161782087,161788307,161791340,161793768,161798146,161804238,161814901,161816187,161817000,161818387,161819414,161822139,161825091,161825830,161827120,161842770,161844666,161849074,161853394,161854224,	161454346,161667742,161780676,161782564,161788571,161791456,161793919,161798416,161804424,161814991,161816451,161817270,161818507,161819561,161822259,161825235,161825961,161827253,161842922,161844763,161849236,161853558,161855053,	0	Tnr	cmpl	cmpl	-1,-1,0,1,1,1,0,1,1,1,1,1,1,1,1,1,1,0,1,0,1,1,0,
chr1	161702596	161703109	MACS_peak_400	57.43	INTRAGENIC	NM_022312	chr1	+	161453899	161855053	161780177	161854344	23	161453899,161667641,161780116,161782087,161788307,161791340,161793768,161798146,161804238,161814901,161816187,161817000,161818387,161819414,161822139,161825091,161825830,161827120,161842770,161844666,161849074,161853394,161854224,	161454346,161667742,161780676,161782564,161788571,161791456,161793919,161798416,161804424,161814991,161816451,161817270,161818507,161819561,161822259,161825235,161825961,161827253,161842922,161844763,161849236,161853558,161855053,	0	Tnr	cmpl	cmpl	-1,-1,0,1,1,1,0,1,1,1,1,1,1,1,1,1,1,0,1,0,1,1,0,
chr1	161787923	161788384	MACS_peak_401	70.59	INTRAGENIC	NM_022312	chr1	+	161453899	161855053	161780177	161854344	23	161453899,161667641,161780116,161782087,161788307,161791340,161793768,161798146,161804238,161814901,161816187,161817000,161818387,161819414,161822139,161825091,161825830,161827120,161842770,161844666,161849074,161853394,161854224,	161454346,161667742,161780676,161782564,161788571,161791456,161793919,161798416,161804424,161814991,161816451,161817270,161818507,161819561,161822259,161825235,161825961,161827253,161842922,161844763,161849236,161853558,161855053,	0	Tnr	cmpl	cmpl	-1,-1,0,1,1,1,0,1,1,1,1,1,1,1,1,1,1,0,1,0,1,1,0,
chr1	161794082	161794650	MACS_peak_402	52.72	INTRAGENIC	NM_022312	chr1	+	161453899	161855053	161780177	161854344	23	161453899,161667641,161780116,161782087,161788307,161791340,161793768,161798146,161804238,161814901,161816187,161817000,161818387,161819414,161822139,161825091,161825830,161827120,161842770,161844666,161849074,161853394,161854224,	161454346,161667742,161780676,161782564,161788571,161791456,161793919,161798416,161804424,161814991,161816451,161817270,161818507,161819561,161822259,161825235,161825961,161827253,161842922,161844763,161849236,161853558,161855053,	0	Tnr	cmpl	cmpl	-1,-1,0,1,1,1,0,1,1,1,1,1,1,1,1,1,1,0,1,0,1,1,0,
chr1	162142993	162143707	MACS_peak_403	76.49	TSS	NM_009786	chr1	-	162132497	162143023	162133697	162142798	6	162132497,162135098,162136226,162136743,162138509,162142777,	162133854,162135196,162136326,162136840,162138726,162143023,	0	Cacybp	cmpl	cmpl	2,0,2,1,0,0,
chr1	162602333	162602913	MACS_peak_404	74	NONE
chr1	162964758	162965606	MACS_peak_405	101.67	DOWNSTREAM	NM_172644	chr1	-	162970743	163000763	162971846	163000247	17	162970743,162973743,162975089,162975388,162976907,162980068,162981461,162984071,162986591,162987577,162990175,162990866,162992912,162993377,162995355,162999210,163000123,	162972061,162973819,162975200,162975607,162977060,162980131,162981569,162984251,162986661,162987684,162990222,162990990,162993008,162993479,162995422,162999310,163000763,	0	Dars2	cmpl	cmpl	1,0,0,0,0,0,0,0,2,0,1,0,0,0,2,1,0,
chr1	162964758	162965606	MACS_peak_405	101.67	TSS	NM_173424	chr1	-	162947886	162964390	162950051	162962864	4	162947886,162959772,162961935,162964218,	162950537,162959872,162962895,162964390,	0	Zbtb37	cmpl	cmpl	0,2,0,-1,
chr1	163163246	163163711	MACS_peak_406	54.31	DOWNSTREAM	NM_007453	chr1	-	163170242	163181297	163171851	163181247	5	163170242,163173705,163174326,163177387,163181152,	163171980,163173852,163174473,163177544,163181297,	0	Prdx6	cmpl	cmpl	0,0,0,2,0,
chr1	163826049	163826856	MACS_peak_407	61.94	NONE
chr1	163837557	163838540	MACS_peak_408	143.05	NONE
chr1	163929781	163930409	MACS_peak_409	54.97	TSS	NR_040562	chr1	+	163935099	163946616	163946616	163946616	3	163935099,163935566,163946450,	163935465,163935953,163946616,	0	2810442N19Rik	unk	unk	-1,-1,-1,
chr1	164071381	164071811	MACS_peak_410	57.73	NONE
chr1	164147763	164148403	MACS_peak_411	61.04	UPSTREAM	NR_029796	chr1	+	164153498	164153608	164153608	164153608	1	164153498,	164153608,	0	Mir214	unk	unk	-1,
chr1	164147763	164148403	MACS_peak_411	61.04	TSS	NR_002870	chr1	+	164147753	164155681	164155681	164155681	1	164147753,	164155681,	0	Dnm3os	unk	unk	-1,
chr1	164156019	164156677	MACS_peak_412	59.58	DOWNSTREAM	NR_029796	chr1	+	164153498	164153608	164153608	164153608	1	164153498,	164153608,	0	Mir214	unk	unk	-1,
chr1	164156019	164156677	MACS_peak_412	59.58	DOWNSTREAM	NR_002870	chr1	+	164147753	164155681	164155681	164155681	1	164147753,	164155681,	0	Dnm3os	unk	unk	-1,
chr1	164156019	164156677	MACS_peak_412	59.58	DOWNSTREAM	NR_029810	chr1	+	164147944	164148054	164148054	164148054	1	164147944,	164148054,	0	Mir199a-2	unk	unk	-1,
chr1	164173398	164173969	MACS_peak_413	59.67	DOWNSTREAM	NR_029796	chr1	+	164153498	164153608	164153608	164153608	1	164153498,	164153608,	0	Mir214	unk	unk	-1,
chr1	164173398	164173969	MACS_peak_413	59.67	DOWNSTREAM	NR_002870	chr1	+	164147753	164155681	164155681	164155681	1	164147753,	164155681,	0	Dnm3os	unk	unk	-1,
chr1	164225469	164226187	MACS_peak_414	248.67	NONE
chr1	164318885	164319521	MACS_peak_415	54.35	NONE
chr1	164490258	164490692	MACS_peak_416	109.98	UPSTREAM	NM_016796	chr1	+	164500958	164529209	164504481	164527208	8	164500958,164504428,164508002,164511949,164518326,164519595,164522756,164527179,	164501010,164504547,164508049,164512000,164518427,164519675,164522808,164529209,	0	Vamp4	cmpl	cmpl	-1,0,0,2,2,1,0,1,
chr1	164500172	164501367	MACS_peak_417	160.15	TSS	NM_016796	chr1	+	164500958	164529209	164504481	164527208	8	164500958,164504428,164508002,164511949,164518326,164519595,164522756,164527179,	164501010,164504547,164508049,164512000,164518427,164519675,164522808,164529209,	0	Vamp4	cmpl	cmpl	-1,0,0,2,2,1,0,1,
chr1	165217264	165217965	MACS_peak_418	56.28	TSS	NM_011127	chr1	-	165175249	165243781	165178388	165242766	4	165175249,165187891,165191970,165242525,	165178527,165188073,165192146,165243781,	0	Prrx1	cmpl	cmpl	2,0,1,0,
chr1	165333571	165334218	MACS_peak_419	107.4	TSS	NM_178883	chr1	-	165315039	165333772	165316383	165333714	5	165315039,165322540,165324721,165326942,165333653,	165316828,165322681,165324823,165327300,165333772,	0	Gorab	cmpl	cmpl	2,2,2,1,0,
chr1	165924743	165925318	MACS_peak_420	82.49	TSS	NM_027279	chr1	+	165925075	165927374	165926242	165927331	2	165925075,165926044,	165925202,165927374,	0	2810422O20Rik	cmpl	cmpl	-1,0,
chr1	166563710	166564121	MACS_peak_421	68.01	NONE
chr1	167232640	167233406	MACS_peak_422	259.75	INTRAGENIC	NM_001081126	chr1	+	167225896	167251982	167226012	167251832	7	167225896,167231997,167236308,167240399,167247370,167248879,167251566,	167226019,167232036,167236723,167241124,167247475,167248999,167251982,	0	Gpr161	cmpl	cmpl	0,1,1,2,1,1,1,
chr1	167390772	167391348	MACS_peak_423	52.08	TSS	NM_028759	chr1	-	167259631	167390594	167260069	167390358	19	167259631,167263419,167266875,167268318,167270015,167281014,167281602,167282091,167287559,167318788,167320544,167322269,167329784,167341594,167350241,167352986,167354432,167359384,167390261,	167260134,167263525,167266964,167268475,167270154,167281411,167281671,167282207,167287677,167319046,167320664,167322363,167329999,167341730,167350355,167353172,167354525,167359446,167390594,	0	Dcaf6	cmpl	cmpl	1,0,1,0,2,1,1,2,1,1,1,0,1,0,0,0,0,1,0,
chr1	167564282	167565078	MACS_peak_424	76.64	TSS	NM_001001880	chr1	-	167522311	167564672	167523783	167564524	5	167522311,167534740,167535739,167538568,167564433,	167523808,167534873,167535953,167538735,167564672,	0	Mpzl1	cmpl	cmpl	2,1,0,1,0,
chr1	167915978	167916704	MACS_peak_425	206.5	TSS	NM_198932	chr1	-	167795284	167932765	167805868	167932753	16	167795284,167807107,167810260,167821940,167825035,167826567,167827755,167832270,167836815,167839010,167841418,167843357,167845240,167847052,167861792,167932692,	167806179,167807196,167810606,167822046,167825215,167826713,167827897,167832444,167836910,167839137,167841607,167843480,167845294,167847153,167861858,167932765,	0	Pou2f1	cmpl	cmpl	1,2,1,0,0,1,0,0,1,0,0,0,0,1,1,0,
chr1	167932426	167933245	MACS_peak_426	61.08	TSS	NM_198932	chr1	-	167795284	167932765	167805868	167932753	16	167795284,167807107,167810260,167821940,167825035,167826567,167827755,167832270,167836815,167839010,167841418,167843357,167845240,167847052,167861792,167932692,	167806179,167807196,167810606,167822046,167825215,167826713,167827897,167832444,167836910,167839137,167841607,167843480,167845294,167847153,167861858,167932765,	0	Pou2f1	cmpl	cmpl	1,2,1,0,0,1,0,0,1,0,0,0,0,1,1,0,
chr1	168190830	168191489	MACS_peak_427	59.5	TSS	NM_001164528	chr1	+	168184269	168246963	168184506	168240926	10	168184269,168199435,168200629,168221546,168224721,168225882,168233632,168237850,168238977,168240890,	168184597,168199768,168200749,168221603,168224868,168226059,168233746,168238064,168239674,168246963,	0	Ildr2	cmpl	cmpl	0,1,1,1,1,1,1,1,2,0,
chr1	169168095	169168694	MACS_peak_428	64.57	TSS	NM_030724	chr1	-	169156216	169215258	169156512	169215005	7	169156216,169157862,169160023,169164822,169166733,169167619,169214906,	169156652,169157911,169160121,169164965,169166830,169167779,169215258,	0	Uck2	cmpl	cmpl	1,0,1,2,1,0,0,
chr1	169198983	169199566	MACS_peak_429	58.63	TSS	NM_030724	chr1	-	169156216	169215258	169156512	169215005	7	169156216,169157862,169160023,169164822,169166733,169167619,169214906,	169156652,169157911,169160121,169164965,169166830,169167779,169215258,	0	Uck2	cmpl	cmpl	1,0,1,2,1,0,0,
chr1	169238222	169239116	MACS_peak_430	82.73	TSS	NM_001039483	chr1	+	169238800	169264109	169238994	169260396	7	169238800,169239436,169244237,169246373,169249392,169256006,169260297,	169239064,169239514,169244297,169246420,169249460,169256151,169264109,	0	Tmco1	cmpl	cmpl	0,1,1,1,0,2,0,
chr1	169322776	169323290	MACS_peak_431	50.01	TSS	NM_025569	chr1	-	169302514	169323928	169302633	169308539	6	169302514,169303923,169305582,169307391,169308422,169323881,	169302773,169303996,169305640,169307465,169308546,169323928,	0	Mgst3	cmpl	cmpl	1,0,2,0,0,-1,
chr1	169534953	169535407	MACS_peak_432	55.35	TSS	NM_009107	chr1	+	169528492	169569754	169528882	169569404	10	169528492,169543834,169555058,169557422,169561092,169561360,169562645,169564565,169565830,169569256,	169528931,169544082,169555203,169557602,169561253,169561490,169562778,169564657,169565936,169569754,	0	Rxrg	cmpl	cmpl	0,1,0,1,1,0,1,2,1,2,
chr1	170264671	170265640	MACS_peak_433	112.87	NONE
chr1	170668182	170668683	MACS_peak_434	51.1	NONE
chr1	171461390	171461864	MACS_peak_435	53.48	TSS	NM_023284	chr1	-	171428064	171461595	171428919	171455565	14	171428064,171434595,171436112,171437374,171440530,171442297,171443575,171445042,171446691,171452501,171452985,171454034,171455442,171461452,	171429051,171434731,171436288,171437515,171440668,171442360,171443672,171445116,171446789,171452563,171453062,171454109,171455580,171461595,	0	Nuf2	cmpl	cmpl	0,2,0,0,0,0,2,0,1,2,0,0,0,-1,
chr1	172357248	172357645	MACS_peak_436	116.23	NONE
chr1	172630678	172631420	MACS_peak_437	174.91	DOWNSTREAM	NM_001081304	chr1	-	172634587	172797902	172640009	172797832	16	172634587,172677236,172717476,172718738,172724087,172724787,172729744,172745553,172749377,172764950,172770811,172771816,172779247,172783035,172785243,172797780,	172640218,172677321,172717591,172718806,172724187,172724901,172729876,172745645,172749563,172765171,172771015,172771943,172779348,172783123,172785320,172797902,	0	Atf6	cmpl	cmpl	1,0,2,0,2,2,2,0,0,1,1,0,1,0,1,0,
chr1	172630678	172631420	MACS_peak_437	174.91	DOWNSTREAM	NM_177068	chr1	+	172574662	172612920	172575052	172612456	8	172574662,172577812,172579866,172592489,172596702,172598881,172611167,172611854,	172575226,172578076,172579974,172592666,172596928,172599394,172611344,172612920,	0	Olfml2b	cmpl	cmpl	0,0,0,0,0,1,1,1,
chr1	172696950	172697547	MACS_peak_438	50.45	NONE
chr1	172935453	172936343	MACS_peak_439	50.18	UPSTREAM	NM_144559	chr1	+	172949056	172959892	172949110	172959446	5	172949056,172949658,172950026,172955674,172959267,	172949150,172949679,172950281,172955929,172959892,	0	Fcgr4	cmpl	cmpl	0,1,1,1,1,
chr1	173178605	173179000	MACS_peak_440	61.5	TSS	NM_153064	chr1	-	173164990	173177243	173165180	173177219	13	173164990,173165403,173166487,173166736,173167270,173168075,173168417,173168645,173168840,173169404,173171077,173176221,173177124,	173165218,173165461,173166571,173166832,173167400,173168195,173168503,173168723,173169028,173169525,173171268,173176328,173177243,	0	Ndufs2	cmpl	cmpl	1,0,0,0,2,2,0,0,1,0,1,2,0,
chr1	173192878	173193377	MACS_peak_441	82.9	DOWNSTREAM	NM_172845	chr1	+	173180552	173190053	173180943	173189309	9	173180552,173182667,173183217,173184023,173186278,173186658,173187085,173187849,173188882,	173181600,173182991,173183350,173184194,173186565,173186845,173187261,173188025,173190053,	0	Adamts4	cmpl	cmpl	0,0,0,1,1,0,1,0,2,
chr1	173192878	173193377	MACS_peak_441	82.9	UPSTREAM	NM_020579	chr1	+	173200458	173207026	173201873	173206510	8	173200458,173201333,173201837,173202651,173204083,173204396,173206012,173206236,	173200545,173201504,173202132,173202887,173204274,173204519,173206117,173207026,	0	B4galt3	cmpl	cmpl	-1,-1,0,1,0,2,2,2,
chr1	173192878	173193377	MACS_peak_441	82.9	DOWNSTREAM	NM_013919	chr1	-	173212083	173218092	173212342	173217080	13	173212083,173212627,173212825,173213145,173213485,173213768,173214092,173214708,173215057,173215385,173215672,173216480,173217892,	173212433,173212742,173212933,173213224,173213572,173213872,173214157,173214867,173215169,173215506,173215732,173217101,173218092,	0	Usp21	cmpl	cmpl	2,1,1,0,0,1,2,2,1,0,0,0,-1,
chr1	173192878	173193377	MACS_peak_441	82.9	DOWNSTREAM	NM_008911	chr1	-	173207122	173211317	173207187	173210891	13	173207122,173207416,173207577,173207824,173208012,173208265,173209253,173209560,173209999,173210270,173210518,173210804,173211003,	173207330,173207459,173207727,173207935,173208131,173208326,173209444,173209705,173210132,173210386,173210653,173210899,173211317,	0	Ppox	cmpl	cmpl	1,0,0,0,1,0,1,0,2,0,0,0,-1,
chr1	173403684	173404135	MACS_peak_442	80.23	DOWNSTREAM	NM_172647	chr1	+	173367691	173394724	173367771	173393225	10	173367691,173390493,173390668,173390959,173391331,173391693,173391935,173392733,173393019,173393189,	173367832,173390562,173390776,173391106,173391537,173391796,173392043,173392746,173393071,173394724,	0	F11r	cmpl	cmpl	0,1,1,1,1,0,1,1,2,0,
chr1	173433283	173433783	MACS_peak_443	58.63	DOWNSTREAM	NM_010584	chr1	-	173448254	173465425	173448371	173464942	8	173448254,173459251,173460624,173461164,173461636,173463496,173464884,173465351,	173448524,173459355,173460745,173461323,173461884,173463595,173464948,173465425,	0	Itln1	cmpl	cmpl	0,1,0,0,1,1,0,-1,
chr1	173433283	173433783	MACS_peak_443	58.63	TSS	NM_019484	chr1	+	173433608	173434881	173433787	173434444	1	173433608,	173434881,	0	Alyref2	cmpl	cmpl	0,
chr1	173445178	173445747	MACS_peak_444	52.64	DOWNSTREAM	NM_010584	chr1	-	173448254	173465425	173448371	173464942	8	173448254,173459251,173460624,173461164,173461636,173463496,173464884,173465351,	173448524,173459355,173460745,173461323,173461884,173463595,173464948,173465425,	0	Itln1	cmpl	cmpl	0,1,0,0,1,1,0,-1,
chr1	173445178	173445747	MACS_peak_444	52.64	DOWNSTREAM	NM_019484	chr1	+	173433608	173434881	173433787	173434444	1	173433608,	173434881,	0	Alyref2	cmpl	cmpl	0,
chr1	173463185	173463997	MACS_peak_445	55.07	NONE
chr1	173470731	173471374	MACS_peak_446	60.8	UPSTREAM	NM_018729	chr1	+	173489323	173515447	173489455	173513015	9	173489323,173503811,173504223,173507373,173507945,173509229,173510888,173511773,173512934,	173489516,173504135,173504499,173507478,173508100,173509301,173510951,173511830,173515447,	0	Cd244	cmpl	cmpl	0,1,1,1,1,0,0,0,0,
chr1	173483713	173484350	MACS_peak_447	61.29	TSS	NM_018729	chr1	+	173489323	173515447	173489455	173513015	9	173489323,173503811,173504223,173507373,173507945,173509229,173510888,173511773,173512934,	173489516,173504135,173504499,173507478,173508100,173509301,173510951,173511830,173515447,	0	Cd244	cmpl	cmpl	0,1,1,1,1,0,0,0,0,
chr1	173489969	173490461	MACS_peak_448	51.87	TSS	NM_018729	chr1	+	173489323	173515447	173489455	173513015	9	173489323,173503811,173504223,173507373,173507945,173509229,173510888,173511773,173512934,	173489516,173504135,173504499,173507478,173508100,173509301,173510951,173511830,173515447,	0	Cd244	cmpl	cmpl	0,1,1,1,1,0,0,0,0,
chr1	173492610	173493177	MACS_peak_449	52.8	TSS	NM_018729	chr1	+	173489323	173515447	173489455	173513015	9	173489323,173503811,173504223,173507373,173507945,173509229,173510888,173511773,173512934,	173489516,173504135,173504499,173507478,173508100,173509301,173510951,173511830,173515447,	0	Cd244	cmpl	cmpl	0,1,1,1,1,0,0,0,0,
chr1	173496924	173497367	MACS_peak_450	56.42	TSS	NM_018729	chr1	+	173489323	173515447	173489455	173513015	9	173489323,173503811,173504223,173507373,173507945,173509229,173510888,173511773,173512934,	173489516,173504135,173504499,173507478,173508100,173509301,173510951,173511830,173515447,	0	Cd244	cmpl	cmpl	0,1,1,1,1,0,0,0,0,
chr1	173498547	173498988	MACS_peak_451	64.61	TSS	NM_018729	chr1	+	173489323	173515447	173489455	173513015	9	173489323,173503811,173504223,173507373,173507945,173509229,173510888,173511773,173512934,	173489516,173504135,173504499,173507478,173508100,173509301,173510951,173511830,173515447,	0	Cd244	cmpl	cmpl	0,1,1,1,1,0,0,0,0,
chr1	174239791	174240382	MACS_peak_452	65.3	DOWNSTREAM	NM_008429	chr1	-	174251163	174259394	174252993	174256686	4	174251163,174255836,174258128,174259265,	174253325,174256714,174258229,174259394,	0	Kcnj9	cmpl	cmpl	1,0,-1,-1,
chr1	174239791	174240382	MACS_peak_452	65.3	TSS	NM_080419	chr1	+	174242537	174249966	174242666	174249539	7	174242537,174246281,174247485,174248167,174248684,174249423,174249714,	174242724,174246659,174247947,174248575,174249098,174249554,174249966,	0	Igsf8	cmpl	cmpl	0,1,1,1,1,1,-1,
chr1	174242133	174242703	MACS_peak_453	52.56	DOWNSTREAM	NM_008429	chr1	-	174251163	174259394	174252993	174256686	4	174251163,174255836,174258128,174259265,	174253325,174256714,174258229,174259394,	0	Kcnj9	cmpl	cmpl	1,0,-1,-1,
chr1	174242133	174242703	MACS_peak_453	52.56	TSS	NM_080419	chr1	+	174242537	174249966	174242666	174249539	7	174242537,174246281,174247485,174248167,174248684,174249423,174249714,	174242724,174246659,174247947,174248575,174249098,174249554,174249966,	0	Igsf8	cmpl	cmpl	0,1,1,1,1,1,-1,
chr1	174290343	174290881	MACS_peak_454	55.21	TSS	NM_001039484	chr1	+	174271340	174304216	174299051	174300191	2	174271340,174299051,	174271582,174304216,	0	Kcnj10	cmpl	cmpl	-1,0,
chr1	174306242	174306841	MACS_peak_455	64.57	DOWNSTREAM	NM_001039484	chr1	+	174271340	174304216	174299051	174300191	2	174271340,174299051,	174271582,174304216,	0	Kcnj10	cmpl	cmpl	-1,0,
chr1	174306242	174306841	MACS_peak_455	64.57	TSS	NM_026234	chr1	+	174306661	174314230	174306829	174308101	1	174306661,	174314230,	0	Pigm	cmpl	cmpl	0,
chr1	174386102	174386756	MACS_peak_456	170.02	UPSTREAM	NM_029612	chr1	+	174405490	174408540	174405627	174408390	4	174405490,174406263,174407336,174408190,	174405670,174406605,174407609,174408540,	0	Slamf9	cmpl	cmpl	0,1,1,1,
chr1	174421040	174421592	MACS_peak_457	54.03	UPSTREAM	NM_178598	chr1	+	174430376	174437506	174435278	174436839	5	174430376,174435250,174435891,174436316,174436697,	174430463,174435458,174436066,174436419,174437506,	0	Tagln2	cmpl	cmpl	-1,0,0,1,2,
chr1	174421040	174421592	MACS_peak_457	54.03	INTRAGENIC	NM_001145800	chr1	+	174412343	174429008	174414619	174428669	21	174412343,174414411,174414912,174419643,174420419,174420785,174421745,174421995,174422231,174423617,174424228,174424536,174424883,174425238,174425664,174426113,174426281,174426728,174427016,174428127,174428487,	174412391,174414677,174415101,174419796,174420574,174420903,174421887,174422141,174422374,174423758,174424345,174424687,174425007,174425414,174425915,174426198,174426458,174426771,174427877,174428255,174429008,	0	Igsf9	cmpl	cmpl	-1,0,1,1,1,0,1,2,1,0,0,0,1,2,1,0,1,1,2,2,1,
chr1	174421040	174421592	MACS_peak_457	54.03	INTRAGENIC	NM_033608	chr1	+	174412447	174429008	174414619	174428669	21	174412447,174414411,174414912,174419643,174420419,174420785,174421745,174421995,174422231,174423617,174424228,174424536,174424883,174425238,174425664,174426113,174426281,174426728,174427016,174428127,174428487,	174412561,174414677,174415101,174419796,174420574,174420903,174421887,174422141,174422374,174423758,174424345,174424687,174425007,174425414,174425915,174426198,174426458,174426771,174427877,174428255,174429008,	0	Igsf9	cmpl	cmpl	-1,0,1,1,1,0,1,2,1,0,0,0,1,2,1,0,1,1,2,2,1,
chr1	174421040	174421592	MACS_peak_457	54.03	DOWNSTREAM	NM_029612	chr1	+	174405490	174408540	174405627	174408390	4	174405490,174406263,174407336,174408190,	174405670,174406605,174407609,174408540,	0	Slamf9	cmpl	cmpl	0,1,1,1,
chr1	174431089	174431748	MACS_peak_458	52.63	TSS	NM_178598	chr1	+	174430376	174437506	174435278	174436839	5	174430376,174435250,174435891,174436316,174436697,	174430463,174435458,174436066,174436419,174437506,	0	Tagln2	cmpl	cmpl	-1,0,0,1,2,
chr1	174610815	174611547	MACS_peak_459	54.05	UPSTREAM	NM_007768	chr1	+	174628186	174630097	174628267	174629158	2	174628186,174628544,	174628331,174630097,	0	Crp	cmpl	cmpl	0,1,
chr1	175078483	175079131	MACS_peak_460	60.39	NONE
chr1	177024947	177025577	MACS_peak_461	61.88	NONE
chr1	177622350	177623307	MACS_peak_462	98.99	TSS	NM_021350	chr1	-	177612368	177618484	177616618	177618484	1	177612368,	177618484,	0	Chml	cmpl	cmpl	0,
chr1	179381572	179382282	MACS_peak_463	62.44	DOWNSTREAM	NM_013915	chr1	+	179375951	179380897	179377233	179378802	1	179375951,	179380897,	0	Zfp238	cmpl	cmpl	0,
chr1	179381572	179382282	MACS_peak_463	62.44	DOWNSTREAM	NM_001012330	chr1	+	179374791	179380897	179374940	179378802	2	179374791,179377219,	179374953,179380897,	0	Zfp238	cmpl	cmpl	0,1,
chr1	179611826	179612504	MACS_peak_464	51.26	NONE
chr1	179725882	179726301	MACS_peak_465	58.87	TSS	NM_007422	chr1	-	179693308	179726640	179694375	179726525	13	179693308,179697785,179700055,179701271,179702202,179703705,179705711,179706587,179706943,179712973,179714179,179715026,179726342,	179694428,179697935,179700153,179701396,179702357,179703832,179705793,179706695,179707010,179713024,179714248,179715129,179726640,	0	Adss	cmpl	cmpl	1,1,2,0,1,0,2,2,1,1,1,0,0,
chr1	180566172	180566719	MACS_peak_466	54.45	INTRAGENIC	NM_001161665	chr1	+	180459255	180862988	180459693	180862359	15	180459255,180460519,180608956,180645933,180751613,180794976,180799476,180800727,180804102,180814045,180843819,180844892,180858289,180858974,180862210,	180459756,180460921,180609490,180646100,180751797,180795183,180799570,180800990,180804286,180814205,180843982,180848307,180858492,180859125,180862988,	0	Kif26b	cmpl	cmpl	0,0,0,0,2,0,0,1,0,1,2,0,1,0,1,
chr1	180640958	180641405	MACS_peak_467	63.96	INTRAGENIC	NM_001161665	chr1	+	180459255	180862988	180459693	180862359	15	180459255,180460519,180608956,180645933,180751613,180794976,180799476,180800727,180804102,180814045,180843819,180844892,180858289,180858974,180862210,	180459756,180460921,180609490,180646100,180751797,180795183,180799570,180800990,180804286,180814205,180843982,180848307,180858492,180859125,180862988,	0	Kif26b	cmpl	cmpl	0,0,0,0,2,0,0,1,0,1,2,0,1,0,1,
chr1	180914347	180914914	MACS_peak_468	52.8	NONE
chr1	180976621	180977062	MACS_peak_469	56.62	NONE
chr1	181032806	181033419	MACS_peak_470	56.15	NONE
chr1	181071100	181071827	MACS_peak_471	123.12	NONE
chr1	181216624	181217367	MACS_peak_472	81.3	NONE
chr1	181489287	181489877	MACS_peak_473	58.04	TSS	NM_146105	chr1	+	181476659	181557604	181509520	181555335	11	181476659,181509468,181522815,181531832,181534649,181535083,181536378,181536567,181539916,181552897,181555129,	181476747,181509899,181522997,181531863,181534736,181535198,181536400,181536664,181540797,181553033,181557604,	0	Cnst	cmpl	cmpl	-1,0,1,0,1,1,2,0,1,0,1,
chr1	182251549	182252153	MACS_peak_474	56.88	DOWNSTREAM	NR_003623	chr1	-	182257099	182260680	182260680	182260680	1	182257099,	182260680,	0	Gm5069	unk	unk	-1,
chr1	182251549	182252153	MACS_peak_474	56.88	UPSTREAM	NM_001081175	chr1	+	182260606	182353790	182262441	182352021	8	182260606,182262242,182342804,182343917,182348284,182350388,182351405,182351805,	182260910,182264361,182342904,182344131,182348489,182350490,182351477,182353790,	0	Itpkb	cmpl	cmpl	-1,0,0,1,2,0,0,0,
chr1	182392137	182392606	MACS_peak_475	69.7	TSS	NM_001081227	chr1	-	182362503	182413635	182368459	182413460	4	182362503,182369236,182372674,182413258,	182368494,182369245,182372854,182413635,	0	6330403A02Rik	cmpl	cmpl	1,1,1,0,
chr1	182489410	182490275	MACS_peak_476	221.69	UPSTREAM	NM_007415	chr1	+	182499105	182531385	182499164	182530662	23	182499105,182503782,182507713,182509284,182510663,182512888,182513860,182515973,182517391,182518051,182518489,182518780,182519528,182521348,182522978,182524173,182524785,182527420,182528341,182529083,182529723,182530226,182530580,	182499284,182503948,182507829,182509499,182510766,182513005,182514037,182516121,182517532,182518291,182518558,182518913,182519724,182521477,182523062,182524296,182524914,182527519,182528494,182529211,182529785,182530341,182531385,	0	Parp1	cmpl	cmpl	0,0,1,0,2,0,0,0,1,1,1,1,2,0,0,0,0,0,0,0,2,1,2,
chr1	183047363	183047980	MACS_peak_477	70.41	NONE
chr1	183853296	183854158	MACS_peak_478	78.28	NONE
chr1	184021728	184022381	MACS_peak_479	74.61	NONE
chr1	184329548	184330224	MACS_peak_480	58.16	UPSTREAM	NM_173378	chr1	+	184339297	184392567	184339554	184391859	18	184339297,184359024,184361689,184365482,184367028,184370967,184371752,184372263,184372763,184374455,184374791,184376404,184378531,184382785,184383828,184385827,184388890,184391817,	184339581,184359172,184361803,184365565,184367130,184371142,184371934,184372428,184372992,184374563,184374940,184376867,184379310,184382923,184383962,184385994,184389090,184392567,	0	Trp53bp2	cmpl	cmpl	0,0,1,1,0,0,1,0,0,1,1,0,1,0,0,2,1,0,
chr1	184419852	184420427	MACS_peak_481	59.32	NONE
chr1	184548287	184548722	MACS_peak_482	57.22	DOWNSTREAM	NM_001145806	chr1	+	184495137	184536657	184495191	184535374	10	184495137,184502063,184527077,184527705,184528792,184529672,184532159,184533777,184534570,184535363,	184495428,184502133,184527196,184527839,184528961,184529756,184532245,184533852,184534731,184536657,	0	Capn8	cmpl	cmpl	0,0,1,0,2,0,0,2,2,1,
chr1	184548287	184548722	MACS_peak_482	57.22	INTRAGENIC	NM_130890	chr1	+	184495137	184562483	184495191	184562238	21	184495137,184502063,184527077,184527705,184528792,184529672,184532159,184533777,184534570,184537724,184541219,184543456,184544919,184550280,184552591,184554049,184557666,184558108,184558729,184560232,184562214,	184495428,184502133,184527196,184527839,184528961,184529756,184532245,184533852,184534731,184537900,184541231,184543668,184544956,184550349,184552649,184554114,184557735,184558187,184558846,184560291,184562483,	0	Capn8	cmpl	cmpl	0,0,1,0,2,0,0,2,2,1,0,0,2,0,0,1,0,0,1,1,0,
chr1	184695444	184696206	MACS_peak_483	58.53	TSS	NM_144796	chr1	+	184695036	184825785	184695171	184825358	8	184695036,184763193,184784087,184788552,184817470,184818898,184822013,184825329,	184695319,184763406,184784261,184788741,184817662,184819043,184822396,184825785,	0	Susd4	cmpl	cmpl	0,1,1,1,1,1,2,1,
chr1	184899974	184900608	MACS_peak_484	61.54	INTRAGENIC	NM_016928	chr1	+	184884918	184906175	184902565	184905885	4	184884918,184899144,184902501,184903301,	184885013,184899272,184902603,184906175,	0	Tlr5	cmpl	cmpl	-1,-1,0,2,
chr1	185864839	185865521	MACS_peak_485	165.48	INTRAGENIC	NM_022019	chr1	+	185858339	185899515	185860717	185898402	4	185858339,185860679,185892730,185898136,	185858448,185861531,185893102,185899515,	0	Dusp10	cmpl	cmpl	-1,0,1,1,
chr1	185950881	185951559	MACS_peak_486	112.11	NONE
chr1	186676265	186676714	MACS_peak_487	55.83	DOWNSTREAM	NM_178692	chr1	-	186695804	186706915	186698186	186706870	2	186695804,186706564,	186698306,186706915,	0	C130074G19Rik	cmpl	cmpl	0,0,
chr1	186976763	186977210	MACS_peak_488	63.96	NONE
chr1	187788133	187788628	MACS_peak_489	59.11	NONE
chr1	188081097	188081692	MACS_peak_490	50.6	NONE
chr1	188582973	188583570	MACS_peak_491	57.46	NONE
chr1	189879856	189880416	MACS_peak_492	53.37	INTRAGENIC	NM_001243792	chr1	+	189432884	190038763	189867225	190035018	8	189432884,189617203,189867212,189890219,189970191,189974057,190022454,190034773,	189433084,189617291,189867628,189890336,189970302,189974219,190022724,190038763,	0	Esrrg	cmpl	cmpl	-1,-1,0,1,1,1,1,1,
chr1	189879856	189880416	MACS_peak_492	53.37	INTRAGENIC	NM_011935	chr1	+	189821705	190038763	189821875	190035018	7	189821705,189867212,189890219,189970191,189974057,190022454,190034773,	189821931,189867628,189890336,189970302,189974219,190022724,190038763,	0	Esrrg	cmpl	cmpl	0,2,1,1,1,1,1,
chr1	190490989	190491957	MACS_peak_493	136.59	INTRAGENIC	NM_021408	chr1	+	190086716	190788918	190086912	190788807	71	190086716,190090849,190142839,190174915,190180567,190181734,190182371,190183693,190202794,190205295,190219633,190223619,190239556,190254585,190260690,190266892,190268321,190270575,190275612,190289997,190347206,190355537,190357017,190360187,190361576,190366481,190373713,190374043,190376977,190400056,190402243,190450455,190452421,190457459,190472152,190478438,190502128,190538182,190538919,190551989…	190087388,190091015,190142972,190174979,190180862,190181919,190182593,190183787,190202990,190205426,190219829,190224261,190239740,190254749,190260849,190267387,190268582,190270745,190275757,190290219,190347337,190355664,190357119,190360367,190361707,190366755,190373917,190374124,190377169,190400170,190402405,190450615,190452593,190457607,190472304,190478601,190502308,190538333,190539062,190552618…	0	Ush2a	cmpl	cmpl	0,2,0,1,2,0,2,2,0,1,0,1,1,2,1,1,1,1,0,1,1,0,1,1,1,0,1,1,1,1,1,1,2,0,1,0,1,1,2,1,0,2,2,1,1,0,2,0,1,1,0,1,1,0,1,1,2,1,1,2,0,0,2,0,0,2,1,1,1,0,0,
chr1	190579252	190579776	MACS_peak_494	64	INTRAGENIC	NM_021408	chr1	+	190086716	190788918	190086912	190788807	71	190086716,190090849,190142839,190174915,190180567,190181734,190182371,190183693,190202794,190205295,190219633,190223619,190239556,190254585,190260690,190266892,190268321,190270575,190275612,190289997,190347206,190355537,190357017,190360187,190361576,190366481,190373713,190374043,190376977,190400056,190402243,190450455,190452421,190457459,190472152,190478438,190502128,190538182,190538919,190551989…	190087388,190091015,190142972,190174979,190180862,190181919,190182593,190183787,190202990,190205426,190219829,190224261,190239740,190254749,190260849,190267387,190268582,190270745,190275757,190290219,190347337,190355664,190357119,190360367,190361707,190366755,190373917,190374124,190377169,190400170,190402405,190450615,190452593,190457607,190472304,190478601,190502308,190538333,190539062,190552618…	0	Ush2a	cmpl	cmpl	0,2,0,1,2,0,2,2,0,1,0,1,1,2,1,1,1,1,0,1,1,0,1,1,1,0,1,1,1,1,1,1,2,0,1,0,1,1,2,1,0,2,2,1,1,0,2,0,1,1,0,1,1,0,1,1,2,1,1,2,0,0,2,0,0,2,1,1,1,0,0,
chr1	190797003	190797455	MACS_peak_495	55.54	DOWNSTREAM	NM_021408	chr1	+	190086716	190788918	190086912	190788807	71	190086716,190090849,190142839,190174915,190180567,190181734,190182371,190183693,190202794,190205295,190219633,190223619,190239556,190254585,190260690,190266892,190268321,190270575,190275612,190289997,190347206,190355537,190357017,190360187,190361576,190366481,190373713,190374043,190376977,190400056,190402243,190450455,190452421,190457459,190472152,190478438,190502128,190538182,190538919,190551989…	190087388,190091015,190142972,190174979,190180862,190181919,190182593,190183787,190202990,190205426,190219829,190224261,190239740,190254749,190260849,190267387,190268582,190270745,190275757,190290219,190347337,190355664,190357119,190360367,190361707,190366755,190373917,190374124,190377169,190400170,190402405,190450615,190452593,190457607,190472304,190478601,190502308,190538333,190539062,190552618…	0	Ush2a	cmpl	cmpl	0,2,0,1,2,0,2,2,0,1,0,1,1,2,1,1,1,1,0,1,1,0,1,1,1,0,1,1,1,1,1,1,2,0,1,0,1,1,2,1,0,2,2,1,1,0,2,0,1,1,0,1,1,0,1,1,2,1,1,2,0,0,2,0,0,2,1,1,1,0,0,
chr1	191183538	191184030	MACS_peak_496	110.43	NONE
chr1	191192535	191192912	MACS_peak_497	117.84	NONE
chr1	191230880	191231528	MACS_peak_498	53.44	NONE
chr1	191553317	191553772	MACS_peak_499	88.46	TSS	NM_008976	chr1	+	191552146	191700572	191610653	191693934	19	191552146,191610514,191622390,191646467,191648908,191656606,191657196,191660219,191663350,191664340,191667040,191670212,191673902,191678803,191680512,191684336,191687082,191689250,191693805,	191552543,191610827,191622560,191646565,191648976,191656677,191657284,191660308,191663438,191664423,191667098,191670291,191675386,191678947,191680731,191684465,191687317,191689414,191700572,	0	Ptpn14	cmpl	cmpl	-1,0,0,2,1,0,2,0,2,0,2,0,1,0,0,0,0,1,0,
chr1	191610530	191611195	MACS_peak_500	88.93	INTRAGENIC	NM_008976	chr1	+	191552146	191700572	191610653	191693934	19	191552146,191610514,191622390,191646467,191648908,191656606,191657196,191660219,191663350,191664340,191667040,191670212,191673902,191678803,191680512,191684336,191687082,191689250,191693805,	191552543,191610827,191622560,191646565,191648976,191656677,191657284,191660308,191663438,191664423,191667098,191670291,191675386,191678947,191680731,191684465,191687317,191689414,191700572,	0	Ptpn14	cmpl	cmpl	-1,0,0,2,1,0,2,0,2,0,2,0,1,0,0,0,0,1,0,
chr1	191678608	191678977	MACS_peak_501	98.24	INTRAGENIC	NM_008976	chr1	+	191552146	191700572	191610653	191693934	19	191552146,191610514,191622390,191646467,191648908,191656606,191657196,191660219,191663350,191664340,191667040,191670212,191673902,191678803,191680512,191684336,191687082,191689250,191693805,	191552543,191610827,191622560,191646565,191648976,191656677,191657284,191660308,191663438,191664423,191667098,191670291,191675386,191678947,191680731,191684465,191687317,191689414,191700572,	0	Ptpn14	cmpl	cmpl	-1,0,0,2,1,0,2,0,2,0,2,0,1,0,0,0,0,1,0,
chr1	192644578	192645392	MACS_peak_502	82.33	NONE
chr1	192744854	192745365	MACS_peak_503	50.26	UPSTREAM	NR_037578	chr1	+	192752383	192770370	192770370	192770370	9	192752383,192756745,192761322,192762965,192764752,192765999,192766708,192767655,192768818,	192752596,192757071,192761579,192763035,192765174,192766126,192766766,192767819,192770370,	0	Angel2	unk	unk	-1,-1,-1,-1,-1,-1,-1,-1,-1,
chr1	192744854	192745365	MACS_peak_503	50.26	UPSTREAM	NM_021421	chr1	+	192752383	192770370	192752578	192768970	9	192752383,192756745,192761322,192762965,192764752,192765999,192766708,192767655,192768818,	192752637,192757071,192761579,192763035,192765174,192766126,192766766,192767819,192770370,	0	Angel2	cmpl	cmpl	0,2,1,0,1,0,1,2,1,
chr1	192744854	192745365	MACS_peak_503	50.26	UPSTREAM	NR_037579	chr1	+	192752383	192770370	192770370	192770370	8	192752383,192761322,192762965,192764752,192765999,192766708,192767655,192768818,	192752637,192761579,192763035,192765174,192766126,192766766,192767819,192770370,	0	Angel2	unk	unk	-1,-1,-1,-1,-1,-1,-1,-1,
chr1	192744854	192745365	MACS_peak_503	50.26	TSS	NM_001199020	chr1	+	192748986	192770370	192756752	192768970	10	192748986,192750566,192756745,192761322,192762965,192764752,192765999,192766708,192767655,192768818,	192749058,192750613,192757071,192761579,192763035,192765174,192766126,192766766,192767819,192770370,	0	Angel2	cmpl	cmpl	-1,-1,0,1,0,1,0,1,2,1,
chr1	192867197	192867689	MACS_peak_504	59.39	DOWNSTREAM	NM_001163421	chr1	-	192869708	192886811	192870188	192886736	10	192869708,192873160,192876738,192878734,192879140,192880241,192882705,192883991,192885103,192886679,	192870215,192873241,192876851,192878790,192879250,192880304,192882790,192884065,192885136,192886811,	0	Tatdn3	cmpl	cmpl	0,0,1,2,0,0,2,0,0,0,
chr1	192867197	192867689	MACS_peak_504	59.39	DOWNSTREAM	NR_027298	chr1	+	192849229	192853660	192853660	192853660	2	192849229,192853230,	192850448,192853660,	0	A230020J21Rik	unk	unk	-1,-1,
chr1	192867197	192867689	MACS_peak_504	59.39	DOWNSTREAM	NM_001163422	chr1	-	192869708	192886811	192870188	192886736	9	192869708,192873160,192878734,192879140,192880241,192882705,192883991,192885103,192886679,	192870199,192873241,192878790,192879250,192880304,192882790,192884065,192885136,192886811,	0	Tatdn3	cmpl	cmpl	1,1,2,0,0,2,0,0,0,
chr1	192867197	192867689	MACS_peak_504	59.39	UPSTREAM	NM_198654	chr1	+	192886899	192908437	192886917	192906328	6	192886899,192889053,192893868,192895056,192904367,192906049,	192887151,192889132,192893999,192895111,192904435,192908437,	0	Nsl1	cmpl	cmpl	0,0,1,0,1,0,
chr1	192867197	192867689	MACS_peak_504	59.39	DOWNSTREAM	NM_026895	chr1	-	192869708	192886811	192869986	192886736	10	192869708,192873160,192876738,192878734,192879140,192880241,192882705,192883991,192885103,192886679,	192870199,192873241,192876851,192878790,192879250,192880304,192882790,192884065,192885136,192886811,	0	Tatdn3	cmpl	cmpl	0,0,1,2,0,0,2,0,0,0,
chr1	192867197	192867689	MACS_peak_504	59.39	DOWNSTREAM	NM_029336	chr1	+	192860700	192866820	192863461	192866777	3	192860700,192863423,192866757,	192860753,192863735,192866820,	0	1700022P22Rik	cmpl	cmpl	-1,0,1,
chr1	193017324	193017982	MACS_peak_505	114.58	NONE
chr1	193399293	193400059	MACS_peak_506	79.23	TSS	NM_029766	chr1	-	193361243	193399413	193363121	193399279	15	193361243,193364582,193370369,193372174,193376866,193380319,193380662,193381939,193385303,193386989,193392169,193392373,193393545,193394457,193399227,	193363220,193365415,193370502,193372264,193376979,193380424,193380766,193382013,193385416,193387055,193392290,193392435,193393644,193394583,193399413,	0	Dtl	cmpl	cmpl	0,1,0,0,1,1,2,0,1,1,0,1,1,1,0,
chr1	194167897	194168521	MACS_peak_507	77.4	INTRAGENIC	NM_001038607	chr1	+	194014753	194334040	194014889	194330003	11	194014753,194045214,194048726,194062606,194065800,194100579,194161281,194236898,194242564,194258604,194329145,	194014968,194045338,194048833,194062735,194065919,194100972,194161711,194237098,194242817,194258801,194334040,	0	Kcnh1	cmpl	cmpl	0,1,2,1,1,0,0,1,0,1,0,
chr1	194167897	194168521	MACS_peak_507	77.4	INTRAGENIC	NM_010600	chr1	+	194014753	194334040	194014889	194330003	11	194014753,194045214,194048726,194062606,194065800,194100579,194161281,194236898,194242564,194258604,194329145,	194014968,194045338,194048833,194062735,194065919,194101053,194161711,194237098,194242817,194258801,194334040,	0	Kcnh1	cmpl	cmpl	0,1,2,1,1,0,0,1,0,1,0,
chr1	194223351	194224417	MACS_peak_508	158.23	INTRAGENIC	NM_001038607	chr1	+	194014753	194334040	194014889	194330003	11	194014753,194045214,194048726,194062606,194065800,194100579,194161281,194236898,194242564,194258604,194329145,	194014968,194045338,194048833,194062735,194065919,194100972,194161711,194237098,194242817,194258801,194334040,	0	Kcnh1	cmpl	cmpl	0,1,2,1,1,0,0,1,0,1,0,
chr1	194223351	194224417	MACS_peak_508	158.23	INTRAGENIC	NM_010600	chr1	+	194014753	194334040	194014889	194330003	11	194014753,194045214,194048726,194062606,194065800,194100579,194161281,194236898,194242564,194258604,194329145,	194014968,194045338,194048833,194062735,194065919,194101053,194161711,194237098,194242817,194258801,194334040,	0	Kcnh1	cmpl	cmpl	0,1,2,1,1,0,0,1,0,1,0,
chr1	194268277	194269331	MACS_peak_509	431.75	INTRAGENIC	NM_001038607	chr1	+	194014753	194334040	194014889	194330003	11	194014753,194045214,194048726,194062606,194065800,194100579,194161281,194236898,194242564,194258604,194329145,	194014968,194045338,194048833,194062735,194065919,194100972,194161711,194237098,194242817,194258801,194334040,	0	Kcnh1	cmpl	cmpl	0,1,2,1,1,0,0,1,0,1,0,
chr1	194268277	194269331	MACS_peak_509	431.75	INTRAGENIC	NM_010600	chr1	+	194014753	194334040	194014889	194330003	11	194014753,194045214,194048726,194062606,194065800,194100579,194161281,194236898,194242564,194258604,194329145,	194014968,194045338,194048833,194062735,194065919,194101053,194161711,194237098,194242817,194258801,194334040,	0	Kcnh1	cmpl	cmpl	0,1,2,1,1,0,0,1,0,1,0,
chr1	194617675	194618809	MACS_peak_510	119.94	NONE
chr1	194632820	194633673	MACS_peak_511	72.04	NONE
chr1	194654891	194655862	MACS_peak_512	508.94	UPSTREAM	NR_040468	chr1	+	194667898	194668933	194668933	194668933	3	194667898,194668496,194668645,	194667931,194668579,194668933,	0	1700065J18Rik	unk	unk	-1,-1,-1,
chr1	194654891	194655862	MACS_peak_512	508.94	DOWNSTREAM	NM_001177794	chr1	-	194670681	194677941	194672566	194677320	4	194670681,194675944,194677145,194677886,	194673409,194676060,194677337,194677941,	0	Sertad4	cmpl	cmpl	0,1,0,-1,
chr1	194654891	194655862	MACS_peak_512	508.94	DOWNSTREAM	NM_198247	chr1	-	194670681	194681946	194672566	194677320	4	194670681,194675944,194677145,194681636,	194673409,194676060,194677337,194681946,	0	Sertad4	cmpl	cmpl	0,1,0,-1,
chr1	194967006	194967997	MACS_peak_513	308.05	UPSTREAM	NM_016851	chr1	+	194979305	194998229	194983412	194995700	8	194979305,194983409,194987806,194988795,194991959,194993632,194994710,194995475,	194979493,194983586,194988011,194988924,194992118,194994025,194994829,194998229,	0	Irf6	cmpl	cmpl	-1,0,0,1,1,1,1,0,
chr1	195125967	195126632	MACS_peak_514	140.2	TSS	NM_008484	chr1	+	195128187	195170072	195129713	195169704	23	195128187,195129681,195130629,195146625,195147246,195149930,195151753,195152082,195154087,195154828,195156233,195156941,195157489,195158316,195160373,195160609,195161042,195161550,195164999,195165582,195166078,195166941,195169567,	195128335,195129741,195130784,195146740,195147320,195150122,195151817,195152267,195154208,195155017,195156389,195157138,195157601,195158695,195160534,195160827,195161240,195161695,195165207,195165724,195166255,195167095,195170072,	0	Lamb3	cmpl	cmpl	-1,0,1,0,1,0,0,1,0,1,1,1,0,1,2,1,0,0,1,2,0,0,1,
chr1	195334351	195335030	MACS_peak_515	278.42	TSS	NR_029592	chr1	-	195333656	195333724	195333724	195333724	1	195333656,	195333724,	0	Mir205	unk	unk	-1,
chr1	195340179	195341200	MACS_peak_516	225.37	NONE
chr1	195347957	195348922	MACS_peak_517	243.57	NONE
chr1	195352425	195353295	MACS_peak_518	183.44	NONE
chr1	195372526	195373066	MACS_peak_519	55.04	NONE
chr1	195376914	195377372	MACS_peak_520	70.93	NONE
chr1	195388298	195389034	MACS_peak_521	53.77	NONE
chr1	195393437	195394262	MACS_peak_522	74.25	NONE
chr1	195394434	195395525	MACS_peak_523	675.19	NONE
chr1	195402169	195402660	MACS_peak_524	51.96	NONE
chr1	195414454	195415166	MACS_peak_525	62.29	NONE
chr1	195469222	195469635	MACS_peak_526	85.23	NONE
chr1	195698813	195699550	MACS_peak_527	60.37	NONE
chr1	196416121	196416679	MACS_peak_528	68.41	NONE
chr1	196476185	196476938	MACS_peak_529	73.08	INTRAGENIC	NM_008882	chr1	+	196446022	196643062	196469953	196638355	32	196446022,196469879,196475649,196538377,196572323,196575505,196577569,196578246,196580513,196588592,196590675,196593564,196606706,196612760,196614972,196615914,196616304,196619922,196620566,196621016,196623100,196623733,196625703,196625968,196626694,196627236,196631096,196632475,196633695,196636255,196637050,196638259,	196446591,196471141,196475832,196538512,196572424,196575629,196577723,196578343,196580628,196588793,196590772,196593755,196606858,196612878,196615109,196616082,196616398,196620162,196620710,196621251,196623243,196624002,196625770,196626115,196626854,196627340,196631196,196632666,196633865,196636468,196637201,196643062,	0	Plxna2	cmpl	cmpl	-1,0,0,0,0,2,0,1,2,0,0,1,0,2,0,2,2,0,0,0,1,0,2,0,0,1,0,1,0,2,2,0,
chr1	196705482	196706026	MACS_peak_530	54.7	NONE
chr1	197067400	197068100	MACS_peak_531	126.54	NONE
chr10	3165846	3166262	MACS_peak_532	59.19	TSS	NM_172546	chr10	+	3134303	3227479	3134857	3226253	13	3134303,3185733,3192055,3193589,3203538,3206102,3208126,3211424,3211872,3217393,3219697,3220356,3225954,	3134909,3185897,3192258,3193677,3203580,3206222,3208186,3211493,3212019,3217518,3219906,3220446,3227479,	0	Cnksr3	cmpl	cmpl	0,1,0,2,0,0,0,0,0,0,2,1,1,
chr10	3340775	3341370	MACS_peak_533	64.93	UPSTREAM	NM_001170800	chr10	+	3366075	3460176	3366868	3456066	9	3366075,3366857,3390408,3391799,3409381,3411265,3426454,3445777,3455865,	3366294,3367027,3390482,3391871,3409440,3411354,3426827,3445971,3460176,	0	Ipcef1	cmpl	cmpl	-1,0,0,2,2,1,0,1,0,
chr10	3340775	3341370	MACS_peak_533	64.93	UPSTREAM	NM_001170802	chr10	+	3366075	3428987	3366868	3426898	7	3366075,3366857,3390408,3391799,3409381,3411265,3426454,	3366294,3367027,3390482,3391871,3409440,3411354,3428987,	0	Ipcef1	cmpl	cmpl	-1,0,0,2,2,1,0,
chr10	3340775	3341370	MACS_peak_533	64.93	TSS	NM_001033391	chr10	+	3323355	3434998	3349993	3434626	8	3323355,3349964,3390408,3391799,3409381,3411265,3426454,3434582,	3323399,3350011,3390482,3391871,3409440,3411354,3426827,3434998,	0	Ipcef1	cmpl	cmpl	-1,0,0,2,2,1,0,1,
chr10	4767572	4768342	MACS_peak_534	71.67	NONE
chr10	5923515	5924185	MACS_peak_535	65.71	INTRAGENIC	NR_002891	chr10	+	5917374	5943370	5943370	5943370	12	5917374,5918848,5924350,5927909,5929348,5931897,5933125,5934809,5935751,5938615,5942550,5943039,	5917456,5919370,5924459,5927985,5929388,5931998,5933232,5934874,5935828,5938736,5942667,5943370,	0	Gm5512	unk	unk	-1,-1,-1,-1,-1,-1,-1,-1,-1,-1,-1,-1,
chr10	5923515	5924185	MACS_peak_535	65.71	INTRAGENIC	NM_025343	chr10	+	5914188	5943372	5918863	5943072	13	5914188,5917369,5918849,5924350,5927909,5929348,5931897,5933125,5934809,5935751,5938615,5942550,5943039,	5914275,5917464,5919370,5924459,5927985,5929388,5931998,5933232,5934874,5935828,5938736,5942667,5943372,	0	Rmnd1	cmpl	cmpl	-1,-1,0,0,1,2,0,2,1,0,2,0,0,
chr10	7382913	7383560	MACS_peak_536	53.52	DOWNSTREAM	NR_033219	chr10	-	7398768	7400956	7400956	7400956	1	7398768,	7400956,	0	BC020402	unk	unk	-1,
chr10	7382913	7383560	MACS_peak_536	53.52	TSS	NM_145706	chr10	+	7387301	7398684	7387359	7398595	8	7387301,7387799,7389350,7390736,7393382,7394803,7396037,7398365,	7387479,7387922,7389428,7390917,7393518,7394955,7396160,7398684,	0	Nup43	cmpl	cmpl	0,0,0,0,1,2,1,1,
chr10	7507179	7507671	MACS_peak_537	59.39	UPSTREAM	NM_026141	chr10	+	7512691	7542361	7512748	7541001	13	7512691,7515441,7515594,7517555,7518212,7519350,7520531,7521642,7524753,7527068,7530159,7534461,7540749,	7512818,7515509,7515659,7517673,7518355,7519447,7520648,7521767,7524820,7527180,7530256,7534609,7542361,	0	Ppil4	cmpl	cmpl	0,1,0,2,0,2,0,0,2,0,1,2,0,
chr10	7507179	7507671	MACS_peak_537	59.39	DOWNSTREAM	NM_011835	chr10	+	7445797	7482948	7458527	7482786	11	7445797,7458520,7461205,7463353,7468573,7471341,7472541,7479494,7480532,7481040,7482587,	7445921,7458695,7461363,7463534,7468695,7471447,7472700,7479621,7480667,7481167,7482948,	0	Katna1	cmpl	cmpl	-1,0,0,2,0,2,0,0,1,1,2,
chr10	7698971	7699576	MACS_peak_538	56.8	NONE
chr10	7707398	7708170	MACS_peak_539	248.27	NONE
chr10	7709308	7709858	MACS_peak_540	54.2	NONE
chr10	7761517	7762081	MACS_peak_541	53.04	NONE
chr10	8991727	8992446	MACS_peak_542	76.04	NONE
chr10	9263986	9264899	MACS_peak_543	177.39	NONE
chr10	9396620	9397310	MACS_peak_544	50.42	TSS	NM_177271	chr10	-	9347056	9395006	9348784	9394761	2	9347056,9394302,	9348847,9395006,	0	Samd5	cmpl	cmpl	0,0,
chr10	10186117	10186686	MACS_peak_545	59.85	TSS	NM_001127353	chr10	-	10055500	10192112	10055735	10192112	37	10055500,10059344,10060231,10066204,10069267,10070049,10072690,10077664,10097639,10098462,10102522,10109933,10110612,10111481,10114353,10115036,10116113,10118654,10120380,10122702,10125082,10125755,10126911,10127239,10130584,10131511,10142463,10146396,10150868,10151079,10153210,10155731,10162282,10163191,10165954,10169764,10192038,	10055924,10059528,10060322,10066372,10069397,10070234,10072861,10077776,10097839,10098647,10102710,10110087,10110747,10111575,10114491,10115172,10116281,10118769,10120522,10122805,10125146,10125936,10126948,10127369,10130675,10131686,10142558,10146531,10150998,10151197,10153297,10155871,10162492,10163263,10166047,10169927,10192112,	0	9130014G24Rik	cmpl	cmpl	0,2,1,1,0,1,1,0,1,2,0,2,2,1,1,0,0,2,1,0,2,1,0,2,1,0,1,1,0,2,2,0,0,0,0,2,0,
chr10	10660984	10661499	MACS_peak_546	57.25	NONE
chr10	12651237	12651917	MACS_peak_547	79.64	DOWNSTREAM	NM_029075	chr10	-	12659786	12684065	12660918	12661782	3	12659786,12663957,12683805,	12661787,12664092,12684065,	0	Stx11	cmpl	cmpl	0,-1,-1,
chr10	12651237	12651917	MACS_peak_547	79.64	DOWNSTREAM	NM_001163590	chr10	-	12659786	12684065	12660918	12661782	2	12659786,12683805,	12661787,12684065,	0	Stx11	cmpl	cmpl	0,-1,
chr10	12651237	12651917	MACS_peak_547	79.64	DOWNSTREAM	NM_001163591	chr10	-	12659786	12684065	12660918	12661782	2	12659786,12683920,	12661787,12684065,	0	Stx11	cmpl	cmpl	0,-1,
chr10	12658397	12659016	MACS_peak_548	185.97	DOWNSTREAM	NM_029075	chr10	-	12659786	12684065	12660918	12661782	3	12659786,12663957,12683805,	12661787,12664092,12684065,	0	Stx11	cmpl	cmpl	0,-1,-1,
chr10	12658397	12659016	MACS_peak_548	185.97	DOWNSTREAM	NM_001163590	chr10	-	12659786	12684065	12660918	12661782	2	12659786,12683805,	12661787,12684065,	0	Stx11	cmpl	cmpl	0,-1,
chr10	12658397	12659016	MACS_peak_548	185.97	DOWNSTREAM	NM_001163591	chr10	-	12659786	12684065	12660918	12661782	2	12659786,12683920,	12661787,12684065,	0	Stx11	cmpl	cmpl	0,-1,
chr10	12727855	12728459	MACS_peak_549	56.88	TSS	NM_175102	chr10	+	12728255	12728989	12728428	12728689	1	12728255,	12728989,	0	Sf3b5	cmpl	cmpl	0,
chr10	13089330	13090048	MACS_peak_550	217.93	TSS	NM_001195065	chr10	-	12927522	13194202	12934063	13194084	13	12927522,12944589,12952344,12953955,12959715,12965216,12966807,12973147,12975115,12981571,12986778,13011600,13193861,	12934079,12944666,12952482,12954017,12959771,12965373,12967001,12973685,12975127,12981730,12986859,13011768,13194202,	0	Phactr2	cmpl	cmpl	2,0,0,1,2,1,2,1,1,1,1,1,0,
chr10	13096850	13097622	MACS_peak_551	64.54	TSS	NM_001195065	chr10	-	12927522	13194202	12934063	13194084	13	12927522,12944589,12952344,12953955,12959715,12965216,12966807,12973147,12975115,12981571,12986778,13011600,13193861,	12934079,12944666,12952482,12954017,12959771,12965373,12967001,12973685,12975127,12981730,12986859,13011768,13194202,	0	Phactr2	cmpl	cmpl	2,0,0,1,2,1,2,1,1,1,1,1,0,
chr10	13188643	13189413	MACS_peak_552	86.3	TSS	NM_001195065	chr10	-	12927522	13194202	12934063	13194084	13	12927522,12944589,12952344,12953955,12959715,12965216,12966807,12973147,12975115,12981571,12986778,13011600,13193861,	12934079,12944666,12952482,12954017,12959771,12965373,12967001,12973685,12975127,12981730,12986859,13011768,13194202,	0	Phactr2	cmpl	cmpl	2,0,0,1,2,1,2,1,1,1,1,1,0,
chr10	13296747	13297481	MACS_peak_553	53.91	DOWNSTREAM	NM_025748	chr10	+	13272712	13283182	13273071	13282664	6	13272712,13276657,13279919,13281509,13282442,13282620,	13273167,13276762,13280070,13281616,13282515,13283182,	0	Adat2	cmpl	cmpl	0,0,0,1,0,1,
chr10	13408105	13408932	MACS_peak_554	288.99	NONE
chr10	13425485	13425984	MACS_peak_555	51.27	NONE
chr10	14076886	14077383	MACS_peak_556	51.44	NONE
chr10	15299623	15300119	MACS_peak_557	51.53	NONE
chr10	16919941	16920445	MACS_peak_558	58.26	NONE
chr10	17160410	17161064	MACS_peak_559	52.99	NONE
chr10	17261930	17262472	MACS_peak_560	70	NONE
chr10	17441535	17442096	MACS_peak_561	53.29	TSS	NM_010828	chr10	+	17443033	17445480	17443751	17444561	2	17443033,17443743,	17443265,17445480,	0	Cited2	cmpl	cmpl	-1,0,
chr10	17472050	17472737	MACS_peak_562	111.03	NONE
chr10	17589636	17590230	MACS_peak_563	72.61	DOWNSTREAM	NM_138628	chr10	+	17516024	17565469	17518906	17563286	10	17516024,17518893,17526570,17535034,17547597,17550041,17553083,17558713,17561231,17562503,	17516227,17519339,17526662,17535205,17547792,17550161,17553158,17558806,17561327,17565469,	0	Txlnb	cmpl	cmpl	-1,0,1,0,0,0,0,0,0,0,
chr10	17725078	17725680	MACS_peak_564	87.66	DOWNSTREAM	NM_028440	chr10	-	17731066	17743058	17731437	17738705	3	17731066,17738644,17742872,	17731622,17738711,17743058,	0	3110003A17Rik	cmpl	cmpl	1,0,-1,
chr10	17964298	17964766	MACS_peak_565	54.03	NONE
chr10	18070461	18071068	MACS_peak_566	56.64	NONE
chr10	18566218	18566852	MACS_peak_567	76.42	TSS	NM_022032	chr10	+	18564876	18576878	18564998	18575682	3	18564876,18573342,18575455,	18565212,18573483,18576878,	0	Perp	cmpl	cmpl	0,1,1,
chr10	18603844	18604297	MACS_peak_568	71.5	NONE
chr10	19184259	19184922	MACS_peak_569	260.38	NONE
chr10	19321145	19321761	MACS_peak_570	70.51	INTRAGENIC	NM_010511	chr10	+	19311763	19330031	19311891	19329494	7	19311763,19317221,19321125,19323559,19326039,19327062,19328942,	19312003,19317336,19321289,19323738,19326226,19327187,19330031,	0	Ifngr1	cmpl	cmpl	0,1,2,1,0,1,0,
chr10	19321145	19321761	MACS_peak_570	70.51	UPSTREAM	NM_178258	chr10	+	19341833	19354487	19341845	19352724	5	19341833,19344206,19346434,19351419,19352574,	19341903,19344342,19346613,19351589,19354487,	0	Il22ra2	cmpl	cmpl	0,1,2,1,0,
chr10	19435216	19435878	MACS_peak_571	52.41	TSS	NM_172786	chr10	+	19432392	19479859	19432439	19479459	7	19432392,19462708,19469013,19470447,19471248,19475591,19478691,	19432536,19462844,19469192,19470623,19471393,19475731,19479859,	0	Il20ra	cmpl	cmpl	0,1,2,1,0,1,0,
chr10	19889379	19890380	MACS_peak_572	117.41	TSS	NM_008635	chr10	+	19868725	20001396	19868819	19999812	18	19868725,19950589,19953174,19965075,19966403,19970175,19976989,19981664,19986541,19986928,19989165,19993085,19993584,19994051,19994407,19995981,19997930,19999801,	19868886,19950688,19953252,19965239,19966521,19970286,19977103,19981789,19986657,19987182,19989394,19993260,19993686,19994102,19994465,19996081,19998151,20001396,	0	Mtap7	cmpl	cmpl	0,1,1,1,0,1,1,1,0,2,1,2,0,0,0,1,2,1,
chr10	19893544	19894208	MACS_peak_573	97.1	TSS	NM_008635	chr10	+	19868725	20001396	19868819	19999812	18	19868725,19950589,19953174,19965075,19966403,19970175,19976989,19981664,19986541,19986928,19989165,19993085,19993584,19994051,19994407,19995981,19997930,19999801,	19868886,19950688,19953252,19965239,19966521,19970286,19977103,19981789,19986657,19987182,19989394,19993260,19993686,19994102,19994465,19996081,19998151,20001396,	0	Mtap7	cmpl	cmpl	0,1,1,1,0,1,1,1,0,2,1,2,0,0,0,1,2,1,
chr10	20031977	20032639	MACS_peak_574	89.25	TSS	NM_001025392	chr10	+	20032274	20062307	20041818	20059863	13	20032274,20037813,20041808,20042768,20044945,20045735,20047907,20049115,20051891,20053197,20054304,20059514,20059857,	20032410,20037917,20041922,20043674,20045611,20045905,20048013,20049200,20052067,20053378,20054451,20059727,20062307,	0	Bclaf1	cmpl	cmpl	-1,-1,0,2,2,2,1,2,0,2,0,0,0,
chr10	20291097	20291882	MACS_peak_575	70.45	NONE
chr10	20647600	20648211	MACS_peak_576	63.51	UPSTREAM	NM_026203	chr10	+	20672352	20800235	20679575	20798892	24	20672352,20679417,20682870,20683478,20685322,20685731,20688793,20690654,20691829,20696802,20699185,20701129,20704110,20706775,20708349,20720311,20727557,20737718,20760991,20774786,20777958,20792348,20794180,20798889,	20672558,20679886,20683040,20683698,20685515,20685827,20688979,20690807,20691962,20696926,20699415,20701236,20704229,20706906,20708490,20720511,20727584,20737839,20761047,20774949,20778056,20792407,20794283,20800235,	0	Ahi1	cmpl	cmpl	-1,0,2,1,2,0,0,0,0,1,2,1,0,2,1,1,0,0,1,0,1,0,2,0,
chr10	21318465	21319109	MACS_peak_577	53.74	INTRAGENIC	NR_027968	chr10	+	21312950	21342181	21342181	21342181	3	21312950,21313137,21341451,	21313040,21313378,21342181,	0	1700020N01Rik	unk	unk	-1,-1,-1,
chr10	21862012	21862952	MACS_peak_578	173.75	TSS	NM_001254744	chr10	-	21832855	21869076	21833937	21868818	2	21832855,21868294,	21834154,21869076,	0	E030030I06Rik	cmpl	cmpl	2,0,
chr10	22013723	22014186	MACS_peak_579	62.27	UPSTREAM	NR_015465	chr10	+	22026525	22032748	22032748	22032748	3	22026525,22026972,22028510,	22026670,22027104,22032748,	0	C920009B18Rik	unk	unk	-1,-1,-1,
chr10	22013723	22014186	MACS_peak_579	62.27	INTRAGENIC	NM_009018	chr10	+	21893707	22093945	21894125	21901897	6	21893707,21894098,21900423,21900930,21901751,22093582,	21893772,21894216,21900678,21901194,21901921,22093945,	0	Raet1c	cmpl	cmpl	-1,0,1,1,1,-1,
chr10	22013723	22014186	MACS_peak_579	62.27	INTRAGENIC	NM_009017	chr10	+	21893680	22093919	21894125	22092140	7	21893680,21894098,21900423,22090722,22091172,22091994,22093582,	21893772,21894216,21900486,22090920,22091436,22092164,22093919,	0	Raet1b	cmpl	cmpl	-1,0,1,1,1,1,-1,
chr10	22013723	22014186	MACS_peak_579	62.27	DOWNSTREAM	NM_001177775	chr10	+	21993279	22008654	22003293	22008555	6	21993279,22003253,22005496,22005945,22006859,22008520,	21993335,22003369,22005682,22006209,22007054,22008654,	0	H60b	cmpl	cmpl	-1,0,1,1,1,1,
chr10	22013723	22014186	MACS_peak_579	62.27	INTRAGENIC	NM_009016	chr10	+	21878414	22093945	21894125	22092140	10	21878414,21891809,21892986,21893681,21894098,21900423,22090722,22091172,22091994,22093582,	21878524,21891907,21893056,21893772,21894216,21900486,22090920,22091436,22092164,22093945,	0	Raet1a	cmpl	cmpl	-1,-1,-1,-1,0,1,1,1,1,-1,
chr10	22378497	22379154	MACS_peak_580	52.77	TSS	NM_178934	chr10	+	22364816	22423686	22365004	22421981	5	22364816,22384168,22411940,22413799,22421827,	22365119,22385512,22412063,22413932,22423686,	0	Slc2a12	cmpl	cmpl	0,1,1,1,2,
chr10	23465772	23466458	MACS_peak_581	94.69	NONE
chr10	23905259	23905838	MACS_peak_582	51.84	INTRAGENIC	NM_016797	chr10	+	23869122	23908765	23875105	23907526	10	23869122,23875040,23896971,23898922,23899731,23900668,23901323,23902574,23904792,23907433,	23869532,23875190,23897041,23899016,23899869,23900721,23901420,23902647,23904875,23908765,	0	Stx7	cmpl	cmpl	-1,0,1,2,0,0,2,0,1,0,
chr10	24460167	24460734	MACS_peak_583	52.8	NONE
chr10	26092423	26093068	MACS_peak_584	60.63	TSS	NM_172787	chr10	-	25995257	26094991	25995925	26072166	22	25995257,25999422,25999743,26002585,26012446,26022458,26023428,26033652,26035297,26038182,26047492,26049980,26051625,26056038,26057573,26059024,26060713,26062313,26063982,26064417,26072064,26094915,	25996069,25999485,26000219,26002665,26012599,26022561,26023543,26033763,26035383,26038259,26047644,26050072,26051761,26056143,26057665,26059109,26060846,26062473,26064057,26064529,26072181,26094991,	0	L3mbtl3	cmpl	cmpl	0,0,1,2,2,1,0,0,1,2,0,1,0,0,1,0,2,1,1,0,0,-1,
chr10	26211696	26212186	MACS_peak_585	52.05	NONE
chr10	26481796	26482512	MACS_peak_586	179.04	UPSTREAM	NM_176837	chr10	+	26492317	26638454	26492389	26636902	15	26492317,26565737,26569680,26574679,26580362,26589726,26592478,26596962,26598696,26600493,26607586,26609537,26632412,26636198,26636810,	26492502,26565934,26569916,26574743,26580538,26589892,26592570,26597040,26598856,26600576,26607793,26609678,26632537,26636260,26638454,	0	Arhgap18	cmpl	cmpl	0,2,1,0,1,0,1,0,0,1,0,0,0,2,1,
chr10	26579539	26580072	MACS_peak_587	70.92	INTRAGENIC	NM_176837	chr10	+	26492317	26638454	26492389	26636902	15	26492317,26565737,26569680,26574679,26580362,26589726,26592478,26596962,26598696,26600493,26607586,26609537,26632412,26636198,26636810,	26492502,26565934,26569916,26574743,26580538,26589892,26592570,26597040,26598856,26600576,26607793,26609678,26632537,26636260,26638454,	0	Arhgap18	cmpl	cmpl	0,2,1,0,1,0,1,0,0,1,0,0,0,2,1,
chr10	26590340	26590930	MACS_peak_588	58.04	INTRAGENIC	NM_176837	chr10	+	26492317	26638454	26492389	26636902	15	26492317,26565737,26569680,26574679,26580362,26589726,26592478,26596962,26598696,26600493,26607586,26609537,26632412,26636198,26636810,	26492502,26565934,26569916,26574743,26580538,26589892,26592570,26597040,26598856,26600576,26607793,26609678,26632537,26636260,26638454,	0	Arhgap18	cmpl	cmpl	0,2,1,0,1,0,1,0,0,1,0,0,0,2,1,
chr10	27264259	27264832	MACS_peak_589	52.32	TSS	NM_008481	chr10	-	26701091	27336748	26701300	27336602	64	26701091,26704096,26706595,26709121,26710611,26712718,26713208,26720522,26720931,26726485,26735184,26738212,26741266,26743077,26749975,26750826,26755762,26760878,26763344,26764240,26770003,26774302,26776334,26790071,26821134,26823909,26824912,26838284,26839713,26844271,26853772,26858668,26875161,26878583,26884707,26896468,26904189,26907551,26907773,26908066,26908929,26910290,26917103,26924606,269…	26701458,26704319,26706726,26709275,26710767,26712908,26713321,26720691,26721108,26726634,26735361,26738333,26741278,26743216,26750120,26750989,26755887,26761038,26763478,26764384,26770158,26774491,26776451,26790174,26821273,26824073,26825029,26838495,26839876,26844383,26853871,26858811,26875355,26878670,26884832,26896603,26904307,26907685,26907962,26908246,26909073,26910527,26917240,26924787,269…	0	Lama2	cmpl	cmpl	1,0,1,0,0,2,0,2,2,0,0,2,2,1,0,2,0,2,0,0,1,1,1,0,2,0,0,2,1,0,0,1,2,2,0,0,2,0,0,0,0,0,1,0,1,2,2,0,0,2,0,0,0,0,1,0,1,0,0,0,0,1,1,0,
chr10	27876150	27876833	MACS_peak_590	79.36	TSS	NM_008983	chr10	+	27794625	28317203	27794886	28315661	32	27794625,27925939,27983306,28054281,28056227,28074410,28103236,28185563,28192753,28194890,28202993,28212719,28216714,28271423,28279810,28281912,28286300,28288132,28289702,28289979,28293173,28294624,28295395,28300198,28305365,28305728,28306713,28308733,28309064,28311690,28312575,28315607,	27794983,27926062,27983578,28054363,28056343,28074585,28103530,28185866,28192863,28195092,28203099,28212993,28216751,28271562,28279971,28281948,28286485,28288220,28289779,28289997,28293210,28294722,28295512,28300353,28305501,28305878,28306887,28308865,28309190,28311854,28312711,28317203,	0	Ptprk	cmpl	cmpl	0,1,1,0,1,0,1,1,1,0,1,2,0,1,2,1,1,0,1,0,0,1,0,0,2,0,0,0,0,0,2,0,
chr10	27887281	27887790	MACS_peak_591	57.8	TSS	NM_008983	chr10	+	27794625	28317203	27794886	28315661	32	27794625,27925939,27983306,28054281,28056227,28074410,28103236,28185563,28192753,28194890,28202993,28212719,28216714,28271423,28279810,28281912,28286300,28288132,28289702,28289979,28293173,28294624,28295395,28300198,28305365,28305728,28306713,28308733,28309064,28311690,28312575,28315607,	27794983,27926062,27983578,28054363,28056343,28074585,28103530,28185866,28192863,28195092,28203099,28212993,28216751,28271562,28279971,28281948,28286485,28288220,28289779,28289997,28293210,28294722,28295512,28300353,28305501,28305878,28306887,28308865,28309190,28311854,28312711,28317203,	0	Ptprk	cmpl	cmpl	0,1,1,0,1,0,1,1,1,0,1,2,0,1,2,1,1,0,1,0,0,1,0,0,2,0,0,0,0,0,2,0,
chr10	27931689	27932199	MACS_peak_592	50.34	INTRAGENIC	NM_008983	chr10	+	27794625	28317203	27794886	28315661	32	27794625,27925939,27983306,28054281,28056227,28074410,28103236,28185563,28192753,28194890,28202993,28212719,28216714,28271423,28279810,28281912,28286300,28288132,28289702,28289979,28293173,28294624,28295395,28300198,28305365,28305728,28306713,28308733,28309064,28311690,28312575,28315607,	27794983,27926062,27983578,28054363,28056343,28074585,28103530,28185866,28192863,28195092,28203099,28212993,28216751,28271562,28279971,28281948,28286485,28288220,28289779,28289997,28293210,28294722,28295512,28300353,28305501,28305878,28306887,28308865,28309190,28311854,28312711,28317203,	0	Ptprk	cmpl	cmpl	0,1,1,0,1,0,1,1,1,0,1,2,0,1,2,1,1,0,1,0,0,1,0,0,2,0,0,0,0,0,2,0,
chr10	28397290	28397913	MACS_peak_593	55.36	TSS	NM_178666	chr10	+	28388200	28602555	28388465	28583252	6	28388200,28442280,28480960,28501496,28583105,28600756,	28388556,28442442,28481419,28502548,28583258,28602555,	0	Themis	cmpl	cmpl	0,1,1,1,0,-1,
chr10	29081464	29082268	MACS_peak_594	75.97	TSS	NM_026518	chr10	-	29063981	29082248	29066614	29074102	3	29063981,29074097,29081789,	29067689,29074253,29082248,	0	Rnf146	cmpl	cmpl	2,0,-1,
chr10	30884103	30884976	MACS_peak_595	77.4	NONE
chr10	31252958	31253739	MACS_peak_596	63.85	NONE
chr10	31587450	31588116	MACS_peak_597	140.06	NONE
chr10	33739240	33739720	MACS_peak_598	60.56	DOWNSTREAM	NM_001081165	chr10	-	33758589	33764119	33761311	33764075	2	33758589,33763514,	33761698,33764119,	0	Fam26d	cmpl	cmpl	0,0,
chr10	33739240	33739720	MACS_peak_598	60.56	TSS	NM_025614	chr10	-	33716360	33739422	33716532	33739244	7	33716360,33720942,33721463,33722229,33728798,33731877,33739171,	33716654,33721005,33721596,33722373,33728929,33731943,33739422,	0	Rwdd1	cmpl	cmpl	1,1,0,0,1,1,0,
chr10	33895355	33896006	MACS_peak_599	60.14	NONE
chr10	33916864	33917453	MACS_peak_600	123.81	TSS	NM_172508	chr10	-	33871198	33927357	33872021	33903913	6	33871198,33875714,33879774,33882541,33903497,33926885,	33873780,33875922,33880014,33882795,33903966,33927357,	0	Dse	cmpl	cmpl	2,1,1,2,0,-1,
chr10	33948748	33949498	MACS_peak_601	112.01	NONE
chr10	34016994	34017478	MACS_peak_602	52.58	DOWNSTREAM	NM_009433	chr10	+	34001995	34004691	34002086	34003226	1	34001995,	34004691,	0	Tspyl1	cmpl	cmpl	0,
chr10	34016994	34017478	MACS_peak_602	52.58	TSS	NM_030203	chr10	+	34017226	34021126	34017319	34018540	1	34017226,	34021126,	0	Tspyl4	cmpl	cmpl	0,
chr10	34138001	34138792	MACS_peak_603	77.06	DOWNSTREAM	NM_009925	chr10	+	34109786	34116891	34110427	34115882	3	34109786,34110412,34113993,	34109849,34110581,34116891,	0	Col10a1	cmpl	cmpl	-1,0,1,
chr10	34138001	34138792	MACS_peak_603	77.06	TSS	NM_176968	chr10	-	34023417	34138334	34024654	34138259	12	34023417,34030106,34033394,34034555,34042414,34044093,34117919,34119543,34123456,34127340,34131173,34138166,	34024785,34030275,34033547,34034674,34042512,34044268,34118004,34119623,34123593,34127412,34131265,34138334,	0	Nt5dc1	cmpl	cmpl	1,0,0,1,2,1,0,1,2,2,0,0,
chr10	34748117	34748715	MACS_peak_604	50.38	NONE
chr10	36522780	36523383	MACS_peak_605	56.96	INTRAGENIC	NM_001253355	chr10	+	36226612	36554200	36548508	36553317	6	36226612,36273819,36348050,36421735,36548476,36552383,	36227421,36273878,36348216,36421840,36548615,36554200,	0	Hs3st5	cmpl	cmpl	-1,-1,-1,-1,0,2,
chr10	36522780	36523383	MACS_peak_605	56.96	INTRAGENIC	NM_001081208	chr10	+	36226612	36554200	36548508	36553317	4	36226612,36348050,36548476,36552383,	36227421,36348216,36548615,36554200,	0	Hs3st5	cmpl	cmpl	-1,-1,0,2,
chr10	36522780	36523383	MACS_peak_605	56.96	INTRAGENIC	NM_001253356	chr10	+	36226612	36554200	36548508	36553317	5	36226612,36348050,36421735,36548476,36552383,	36227421,36348216,36421840,36548615,36554200,	0	Hs3st5	cmpl	cmpl	-1,-1,-1,0,2,
chr10	36859043	36859599	MACS_peak_606	53.7	TSS	NM_008538	chr10	-	36853048	36858732	36855913	36858341	2	36853048,36858239,	36856741,36858732,	0	Marcks	cmpl	cmpl	0,0,
chr10	36872519	36873028	MACS_peak_607	50.42	NONE
chr10	37320071	37320544	MACS_peak_608	86.11	NONE
chr10	38749621	38750173	MACS_peak_609	54.03	INTRAGENIC	NM_010681	chr10	+	38685320	38829994	38685760	38829839	38	38685320,38725217,38730803,38737126,38746340,38748427,38750238,38752816,38762386,38765458,38767739,38773546,38776582,38779932,38781159,38785409,38787660,38789760,38792520,38793370,38793930,38794469,38795161,38798525,38800287,38802533,38803074,38807058,38808092,38808564,38811935,38814700,38816888,38818132,38823293,38824942,38825767,38829693,	38685955,38725319,38730928,38737207,38746555,38748502,38750390,38752927,38762498,38765626,38767933,38773663,38776731,38780074,38781256,38785526,38787840,38789900,38792700,38793516,38794093,38794603,38795333,38798657,38800430,38802672,38803212,38807192,38808257,38808712,38812123,38814890,38817044,38818292,38823424,38825036,38825887,38829994,	0	Lama4	cmpl	cmpl	0,0,0,2,2,1,1,0,0,1,1,0,0,2,0,1,1,1,0,0,2,0,2,0,0,2,0,0,2,2,0,2,0,0,1,0,1,1,
chr10	39574971	39575797	MACS_peak_610	103.86	INTRAGENIC	NM_011264	chr10	+	39451965	39595011	39452280	39594030	32	39451965,39502948,39510574,39514669,39519686,39524757,39525405,39526467,39526640,39533776,39536947,39540253,39540911,39547515,39550704,39552323,39554965,39556431,39558247,39560690,39563216,39565947,39566474,39567780,39571672,39574504,39578912,39582499,39583543,39584399,39587098,39593889,	39452419,39503138,39510649,39514830,39519783,39524852,39525510,39526552,39526789,39533896,39537185,39540396,39545064,39548411,39550787,39552449,39555158,39556543,39558363,39560809,39563335,39566089,39566719,39567889,39571879,39574614,39579027,39582637,39583734,39584646,39587308,39595011,	0	Rev3l	cmpl	cmpl	0,1,2,2,1,2,1,1,2,1,1,2,1,2,1,0,0,1,2,1,0,2,0,2,0,0,2,0,0,2,0,0,
chr10	39852812	39853445	MACS_peak_611	54.58	TSS	NM_028247	chr10	-	39795207	39862060	39796339	39861842	3	39795207,39800468,39861508,	39796823,39800613,39862060,	0	Slc16a10	cmpl	cmpl	2,1,0,
chr10	39978205	39978923	MACS_peak_612	115.74	TSS	NM_026113	chr10	-	39969008	39977471	39969338	39977465	6	39969008,39970961,39974069,39974206,39977018,39977384,	39969637,39971075,39974114,39974270,39977099,39977471,	0	Gtf3c6	cmpl	cmpl	1,1,1,0,0,0,
chr10	40021962	40022460	MACS_peak_613	51.35	TSS	NM_007444	chr10	-	40007270	40021992	40009134	40021664	8	40007270,40009923,40010183,40011799,40012969,40013986,40014522,40021554,	40009275,40010079,40010421,40011842,40013072,40014113,40014609,40021992,	0	Amd2	cmpl	cmpl	0,0,2,1,0,2,2,0,
chr10	40092775	40093365	MACS_peak_614	50.99	TSS	NM_001168304	chr10	+	40069113	40203624	40069399	40199609	13	40069113,40114130,40154109,40155877,40173820,40186443,40189384,40189691,40195374,40195962,40196694,40197507,40199480,	40069527,40114206,40154220,40156018,40173878,40186575,40189528,40189761,40195447,40196060,40196773,40197774,40203624,	0	Cdk19	cmpl	cmpl	0,2,0,0,0,1,1,1,2,0,2,0,0,
chr10	40602780	40603563	MACS_peak_615	100.41	TSS	NM_027879	chr10	-	40551426	40602949	40552984	40602881	15	40551426,40553981,40556093,40561159,40561505,40562847,40564766,40566935,40567729,40569550,40570735,40572302,40577352,40587629,40602692,	40553162,40554126,40556170,40561293,40561621,40562949,40564812,40567010,40567869,40569647,40570875,40572386,40577482,40587716,40602949,	0	Cdc40	cmpl	cmpl	2,1,2,0,1,1,0,0,1,0,1,1,0,0,0,
chr10	41169499	41170179	MACS_peak_616	72.13	TSS	NM_153398	chr10	+	41170201	41185380	41170925	41184848	7	41170201,41170894,41174833,41175478,41176337,41182084,41184082,	41170336,41171874,41175001,41175562,41176421,41182166,41185380,	0	Zbtb24	cmpl	cmpl	-1,0,1,1,1,1,2,
chr10	41272400	41272885	MACS_peak_617	52.49	UPSTREAM	NR_045341	chr10	+	41287821	41296282	41296282	41296282	4	41287821,41295349,41295839,41296160,	41287905,41295519,41296080,41296282,	0	5730435O14Rik	unk	unk	-1,-1,-1,-1,
chr10	41272400	41272885	MACS_peak_617	52.49	DOWNSTREAM	NM_016898	chr10	+	41239305	41250848	41239340	41248647	6	41239305,41241723,41242978,41243912,41246632,41248477,	41239506,41241813,41243050,41243951,41246689,41250848,	0	Cd164	cmpl	cmpl	0,1,1,1,1,1,
chr10	41314562	41315199	MACS_peak_618	76.13	DOWNSTREAM	NR_045341	chr10	+	41287821	41296282	41296282	41296282	4	41287821,41295349,41295839,41296160,	41287905,41295519,41296080,41296282,	0	5730435O14Rik	unk	unk	-1,-1,-1,-1,
chr10	41612966	41613649	MACS_peak_619	184.53	TSS	NM_001162908	chr10	+	41530379	41628242	41530827	41627164	10	41530379,41613847,41614625,41615828,41617988,41622334,41623497,41624979,41626141,41627077,	41531106,41613913,41614826,41616011,41618231,41622482,41623610,41625170,41626286,41628242,	0	Sesn1	cmpl	cmpl	0,0,0,0,0,0,1,0,2,0,
chr10	41648268	41649166	MACS_peak_620	89.57	DOWNSTREAM	NM_001162908	chr10	+	41530379	41628242	41530827	41627164	10	41530379,41613847,41614625,41615828,41617988,41622334,41623497,41624979,41626141,41627077,	41531106,41613913,41614826,41616011,41618231,41622482,41623610,41625170,41626286,41628242,	0	Sesn1	cmpl	cmpl	0,0,0,0,0,0,1,0,2,0,
chr10	41648268	41649166	MACS_peak_620	89.57	DOWNSTREAM	NM_001013370	chr10	+	41607244	41628242	41607299	41627164	10	41607244,41613847,41614625,41615828,41617988,41622334,41623497,41624979,41626141,41627077,	41607401,41613913,41614826,41616011,41618231,41622482,41623610,41625170,41626286,41628242,	0	Sesn1	cmpl	cmpl	0,0,0,0,0,0,1,0,2,0,
chr10	41808888	41809668	MACS_peak_621	70.85	NONE
chr10	41970761	41971290	MACS_peak_622	56	NONE
chr10	42194750	42195140	MACS_peak_623	107.58	TSS	NM_145743	chr10	-	42032390	42198371	42033296	42198207	13	42032390,42036155,42038397,42059630,42059987,42079970,42120146,42135354,42144983,42146291,42158159,42174112,42198068,	42033422,42036269,42038538,42059731,42060058,42080053,42120205,42135454,42145114,42146393,42158211,42174336,42198371,	0	Lace1	cmpl	cmpl	0,0,0,1,2,0,1,0,1,1,0,1,0,
chr10	42562253	42562737	MACS_peak_624	60.17	UPSTREAM	NM_172938	chr10	+	42580317	42680588	42631881	42677550	9	42580317,42627522,42631822,42643859,42650209,42654758,42666674,42675694,42677424,	42580659,42627601,42632037,42643989,42650410,42654953,42666947,42675840,42680588,	0	Scml4	cmpl	cmpl	-1,-1,0,0,1,1,1,1,0,
chr10	42562253	42562737	MACS_peak_624	60.17	DOWNSTREAM	NM_153055	chr10	+	42481301	42552320	42481570	42548840	21	42481301,42503247,42509105,42510984,42514580,42516011,42517488,42518552,42521438,42521627,42523695,42524881,42526329,42530648,42532241,42532470,42534860,42536173,42543686,42547682,42548696,	42481694,42503347,42509220,42511097,42514642,42516070,42517539,42518661,42521533,42521760,42523788,42525036,42526477,42530731,42532301,42532644,42535019,42536275,42543785,42547787,42552320,	0	Sec63	cmpl	cmpl	0,1,2,0,2,1,0,0,1,0,1,1,0,1,0,0,0,0,0,0,0,
chr10	42584522	42584899	MACS_peak_625	62.3	TSS	NM_172938	chr10	+	42580317	42680588	42631881	42677550	9	42580317,42627522,42631822,42643859,42650209,42654758,42666674,42675694,42677424,	42580659,42627601,42632037,42643989,42650410,42654953,42666947,42675840,42680588,	0	Scml4	cmpl	cmpl	-1,-1,0,0,1,1,1,1,0,
chr10	43147757	43148492	MACS_peak_626	53.84	INTRAGENIC	NM_027772	chr10	+	42941291	43160054	42941567	43159763	8	42941291,43018604,43065333,43091940,43113676,43115366,43133320,43159604,	42941866,43018739,43065532,43092015,43113850,43115498,43133353,43160054,	0	Pdss2	cmpl	cmpl	0,2,2,0,0,0,0,0,
chr10	43147757	43148492	MACS_peak_626	53.84	INTRAGENIC	NM_001168289	chr10	+	42941291	43184688	42941567	43184442	8	42941291,43018604,43065333,43091940,43113676,43115366,43133320,43184430,	42941866,43018739,43065532,43092015,43113850,43115498,43133353,43184688,	0	Pdss2	cmpl	cmpl	0,2,2,0,0,0,0,0,
chr10	43389785	43390621	MACS_peak_627	66.51	NONE
chr10	43640319	43641112	MACS_peak_628	149.34	INTRAGENIC	NM_130892	chr10	+	43621612	43667668	43622068	43666334	9	43621612,43627564,43629712,43630598,43641192,43648128,43652168,43655804,43666226,	43622342,43627716,43629781,43630723,43641241,43648265,43652352,43655897,43667668,	0	Rtn4ip1	cmpl	cmpl	0,1,0,0,2,0,2,0,0,
chr10	43739969	43740461	MACS_peak_629	317	NONE
chr10	43798717	43799360	MACS_peak_630	68.05	NONE
chr10	44100879	44101604	MACS_peak_631	562.09	DOWNSTREAM	NM_053069	chr10	+	43988163	44084097	44005895	44082858	8	43988163,44005837,44009668,44014401,44023372,44039265,44066762,44082721,	43988390,44006003,44009796,44014480,44023535,44039360,44066880,44084097,	0	Atg5	cmpl	cmpl	-1,0,0,2,0,1,0,1,
chr10	44100879	44101604	MACS_peak_631	562.09	DOWNSTREAM	NR_035450	chr10	+	44079481	44079574	44079574	44079574	1	44079481,	44079574,	0	Mir1929	unk	unk	-1,
chr10	44499399	44499997	MACS_peak_632	57.37	NONE
chr10	44786473	44787018	MACS_peak_633	54.62	TSS	NM_011156	chr10	+	44787019	44878801	44787136	44878332	15	44787019,44791858,44810798,44812467,44814786,44817198,44827577,44834868,44840448,44845769,44867790,44870241,44872860,44875321,44878037,	44787181,44791933,44810932,44812598,44814996,44817320,44827683,44835060,44840646,44845873,44867927,44870336,44872992,44875478,44878801,	0	Prep	cmpl	cmpl	0,0,0,2,1,1,0,1,1,1,0,2,1,1,2,
chr10	45093068	45093857	MACS_peak_634	275.89	DOWNSTREAM	NM_024285	chr10	+	45055567	45089514	45059036	45089115	8	45055567,45059025,45062839,45065932,45067590,45073555,45074556,45088996,	45055687,45059262,45062964,45066120,45067699,45073723,45074698,45089514,	0	Bves	cmpl	cmpl	-1,0,1,0,2,0,0,1,
chr10	45093068	45093857	MACS_peak_634	275.89	DOWNSTREAM	NM_001031772	chr10	-	45096424	45190007	45100870	45189866	5	45096424,45138942,45140329,45188842,45189856,	45101237,45139014,45140514,45189024,45190007,	0	Lin28b	cmpl	cmpl	2,2,0,1,0,
chr10	45926068	45926577	MACS_peak_635	50.42	NONE
chr10	46179357	46179922	MACS_peak_636	60.2	NONE
chr10	47738489	47739066	MACS_peak_637	66.59	NONE
chr10	52527286	52527797	MACS_peak_638	50.26	TSS	NM_178675	chr10	+	52410306	52831428	52410802	52828178	8	52410306,52652897,52741649,52782256,52793259,52797702,52809143,52827953,	52410975,52653073,52741777,52782416,52793416,52797755,52809298,52831428,	0	Slc35f1	cmpl	cmpl	0,2,1,0,1,2,1,0,
chr10	52600863	52601376	MACS_peak_639	81.24	TSS	NM_178675	chr10	+	52410306	52831428	52410802	52828178	8	52410306,52652897,52741649,52782256,52793259,52797702,52809143,52827953,	52410975,52653073,52741777,52782416,52793416,52797755,52809298,52831428,	0	Slc35f1	cmpl	cmpl	0,2,1,0,1,2,1,0,
chr10	52744543	52745022	MACS_peak_640	53.03	INTRAGENIC	NM_178675	chr10	+	52410306	52831428	52410802	52828178	8	52410306,52652897,52741649,52782256,52793259,52797702,52809143,52827953,	52410975,52653073,52741777,52782416,52793416,52797755,52809298,52831428,	0	Slc35f1	cmpl	cmpl	0,2,1,0,1,2,1,0,
chr10	52875271	52875709	MACS_peak_641	64.93	NONE
chr10	53117861	53118440	MACS_peak_642	51.84	NONE
chr10	53317103	53317644	MACS_peak_643	54.96	TSS	NM_025541	chr10	+	53316766	53329021	53316995	53327683	4	53316766,53322153,53325914,53327470,	53317104,53322269,53326091,53329021,	0	Asf1a	cmpl	cmpl	0,1,0,0,
chr10	53609202	53610003	MACS_peak_644	98.59	DOWNSTREAM	NM_008548	chr10	-	53625838	53795602	53627242	53794830	13	53625838,53627748,53638963,53639848,53645235,53653297,53654694,53696828,53734220,53745519,53750503,53794221,53795331,	53627369,53627864,53639136,53640068,53645351,53653391,53654818,53696923,53734301,53745635,53750600,53795076,53795602,	0	Man1a	cmpl	cmpl	2,0,1,0,1,0,2,0,0,1,0,0,-1,
chr10	54519233	54519738	MACS_peak_645	65.88	NONE
chr10	56097932	56098461	MACS_peak_646	123.45	TSS	NM_010288	chr10	+	56097105	56110225	56107352	56108501	2	56097105,56107339,	56097324,56110225,	0	Gja1	cmpl	cmpl	-1,0,
chr10	56144799	56145639	MACS_peak_647	80.1	NONE
chr10	57164618	57165192	MACS_peak_648	52.24	NONE
chr10	57424396	57424993	MACS_peak_649	50.45	INTRAGENIC	NM_001039050	chr10	+	57370786	57460918	57447903	57456163	5	57370786,57371887,57412008,57447895,57456095,	57371207,57371979,57412076,57448072,57460918,	0	Pkib	cmpl	cmpl	-1,-1,-1,0,1,
chr10	57424396	57424993	MACS_peak_649	50.45	INTRAGENIC	NM_001039052	chr10	+	57365674	57460918	57447903	57456163	5	57365674,57371887,57412008,57447895,57456095,	57365761,57371979,57412076,57448072,57460918,	0	Pkib	cmpl	cmpl	-1,-1,-1,0,1,
chr10	57424396	57424993	MACS_peak_649	50.45	INTRAGENIC	NM_001039053	chr10	+	57365674	57460918	57447903	57456163	6	57365674,57366221,57371887,57412008,57447895,57456095,	57365761,57366257,57371979,57412076,57448072,57460918,	0	Pkib	cmpl	cmpl	-1,-1,-1,-1,0,1,
chr10	57424396	57424993	MACS_peak_649	50.45	INTRAGENIC	NM_008863	chr10	+	57351786	57460918	57427899	57456163	6	57351786,57371887,57412008,57427879,57447895,57456095,	57352013,57371979,57412076,57427987,57448072,57460918,	0	Pkib	cmpl	cmpl	-1,-1,-1,0,1,1,
chr10	57424396	57424993	MACS_peak_649	50.45	INTRAGENIC	NM_001190402	chr10	+	57370786	57460918	57447903	57456163	5	57370786,57371887,57412008,57447895,57456095,	57371111,57371979,57412076,57448072,57460918,	0	Pkib	cmpl	cmpl	-1,-1,-1,0,1,
chr10	57424396	57424993	MACS_peak_649	50.45	INTRAGENIC	NM_001039051	chr10	+	57351786	57460918	57447903	57456163	5	57351786,57371887,57412008,57447895,57456095,	57352013,57371979,57412076,57448072,57460918,	0	Pkib	cmpl	cmpl	-1,-1,-1,0,1,
chr10	57445506	57446080	MACS_peak_650	52.24	INTRAGENIC	NM_001039050	chr10	+	57370786	57460918	57447903	57456163	5	57370786,57371887,57412008,57447895,57456095,	57371207,57371979,57412076,57448072,57460918,	0	Pkib	cmpl	cmpl	-1,-1,-1,0,1,
chr10	57445506	57446080	MACS_peak_650	52.24	INTRAGENIC	NM_001039052	chr10	+	57365674	57460918	57447903	57456163	5	57365674,57371887,57412008,57447895,57456095,	57365761,57371979,57412076,57448072,57460918,	0	Pkib	cmpl	cmpl	-1,-1,-1,0,1,
chr10	57445506	57446080	MACS_peak_650	52.24	INTRAGENIC	NM_001039053	chr10	+	57365674	57460918	57447903	57456163	6	57365674,57366221,57371887,57412008,57447895,57456095,	57365761,57366257,57371979,57412076,57448072,57460918,	0	Pkib	cmpl	cmpl	-1,-1,-1,-1,0,1,
chr10	57445506	57446080	MACS_peak_650	52.24	INTRAGENIC	NM_008863	chr10	+	57351786	57460918	57427899	57456163	6	57351786,57371887,57412008,57427879,57447895,57456095,	57352013,57371979,57412076,57427987,57448072,57460918,	0	Pkib	cmpl	cmpl	-1,-1,-1,0,1,1,
chr10	57445506	57446080	MACS_peak_650	52.24	INTRAGENIC	NM_001190402	chr10	+	57370786	57460918	57447903	57456163	5	57370786,57371887,57412008,57447895,57456095,	57371111,57371979,57412076,57448072,57460918,	0	Pkib	cmpl	cmpl	-1,-1,-1,0,1,
chr10	57445506	57446080	MACS_peak_650	52.24	INTRAGENIC	NM_001039051	chr10	+	57351786	57460918	57447903	57456163	5	57351786,57371887,57412008,57447895,57456095,	57352013,57371979,57412076,57448072,57460918,	0	Pkib	cmpl	cmpl	-1,-1,-1,0,1,
chr10	57808583	57809220	MACS_peak_651	91.94	TSS	NM_026148	chr10	+	57786213	57887439	57786403	57884316	10	57786213,57861768,57870817,57872307,57872800,57875150,57876720,57879381,57881146,57884201,	57786435,57861928,57870884,57872428,57872950,57875301,57876813,57879430,57881222,57887439,	0	Lims1	cmpl	cmpl	0,2,0,1,2,2,0,0,1,2,
chr10	58104169	58104985	MACS_peak_652	120.96	TSS	NM_010100	chr10	-	58063535	58138444	58065609	58092862	12	58063535,58068792,58070087,58072685,58073021,58073194,58074704,58084060,58091207,58092113,58092811,58138203,	58065932,58068853,58070247,58072758,58073096,58073320,58074791,58084146,58091389,58092236,58092880,58138444,	0	Edar	cmpl	cmpl	1,0,2,1,1,1,1,2,0,0,0,-1,
chr10	58633507	58634086	MACS_peak_653	125.25	NONE
chr10	58785564	58786533	MACS_peak_654	105.32	TSS	NM_011030	chr10	+	58786043	58836052	58799828	58833822	15	58786043,58799801,58802043,58805431,58806404,58810928,58813151,58814830,58817087,58824608,58828036,58830036,58831988,58832334,58833751,	58786224,58799904,58802140,58805583,58806542,58811168,58813348,58815007,58817158,58824708,58828090,58830102,58832057,58832431,58836052,	0	P4ha1	cmpl	cmpl	-1,0,1,2,1,1,1,0,0,2,0,0,0,0,1,
chr10	58828501	58829134	MACS_peak_655	54.58	INTRAGENIC	NM_011030	chr10	+	58786043	58836052	58799828	58833822	15	58786043,58799801,58802043,58805431,58806404,58810928,58813151,58814830,58817087,58824608,58828036,58830036,58831988,58832334,58833751,	58786224,58799904,58802140,58805583,58806542,58811168,58813348,58815007,58817158,58824708,58828090,58830102,58832057,58832431,58836052,	0	P4ha1	cmpl	cmpl	-1,0,1,2,1,1,1,0,0,2,0,0,0,0,1,
chr10	58901985	58902674	MACS_peak_656	94.37	TSS	NM_010959	chr10	-	58885707	58904527	58886686	58904431	9	58885707,58888124,58890691,58892238,58893640,58898614,58900457,58901288,58904370,	58886860,58888224,58891107,58892399,58893763,58898737,58900565,58901663,58904527,	0	Oit3	cmpl	cmpl	0,2,0,1,1,1,1,1,0,
chr10	59065437	59066174	MACS_peak_657	97.28	TSS	NM_001033259	chr10	-	58909731	59079440	58911528	59079418	8	58909731,58913953,58917693,58919396,58929201,58930373,58953834,59079271,	58911606,58914070,58917897,58919557,58929306,58930544,58953904,59079440,	0	Ccdc109a	cmpl	cmpl	0,0,0,1,1,1,0,0,
chr10	59362274	59363107	MACS_peak_658	287.76	DOWNSTREAM	NM_019965	chr10	+	59342338	59360764	59342425	59359219	9	59342338,59352775,59353587,59355419,59355685,59356978,59358335,59359097,59360238,	59342558,59352956,59353733,59355605,59355765,59357088,59358508,59359249,59360764,	0	Dnajb12	cmpl	cmpl	0,1,2,1,1,0,2,1,-1,
chr10	59373565	59374195	MACS_peak_659	61.88	DOWNSTREAM	NM_019965	chr10	+	59342338	59360764	59342425	59359219	9	59342338,59352775,59353587,59355419,59355685,59356978,59358335,59359097,59360238,	59342558,59352956,59353733,59355605,59355765,59357088,59358508,59359249,59360764,	0	Dnajb12	cmpl	cmpl	0,1,2,1,1,0,2,1,-1,
chr10	59379099	59379857	MACS_peak_660	163.22	DOWNSTREAM	NM_019965	chr10	+	59342338	59360764	59342425	59359219	9	59342338,59352775,59353587,59355419,59355685,59356978,59358335,59359097,59360238,	59342558,59352956,59353733,59355605,59355765,59357088,59358508,59359249,59360764,	0	Dnajb12	cmpl	cmpl	0,1,2,1,1,0,2,1,-1,
chr10	59414270	59414965	MACS_peak_661	50.07	TSS	NM_029083	chr10	-	59412422	59414518	59413283	59414260	3	59412422,59414064,59414444,	59413777,59414320,59414518,	0	Ddit4	cmpl	cmpl	1,0,-1,
chr10	59471990	59472527	MACS_peak_662	55.3	INTRAGENIC	NM_026937	chr10	+	59465552	59562738	59467566	59560957	11	59465552,59467542,59470474,59475209,59476343,59504868,59512499,59525207,59527070,59560840,59562453,	59465655,59467675,59470574,59475307,59476522,59505005,59512619,59525332,59527156,59560962,59562738,	0	Ascc1	cmpl	cmpl	-1,0,1,2,1,0,2,2,1,0,-1,
chr10	59471990	59472527	MACS_peak_662	55.3	INTRAGENIC	NM_001199187	chr10	+	59466074	59562738	59467566	59560957	11	59466074,59467542,59470474,59475209,59476343,59504868,59512499,59525207,59527070,59560840,59562453,	59466164,59467675,59470574,59475307,59476522,59505005,59512619,59525332,59527156,59560962,59562738,	0	Ascc1	cmpl	cmpl	-1,0,1,2,1,0,2,2,1,0,-1,
chr10	59542598	59543408	MACS_peak_663	129.97	INTRAGENIC	NM_026937	chr10	+	59465552	59562738	59467566	59560957	11	59465552,59467542,59470474,59475209,59476343,59504868,59512499,59525207,59527070,59560840,59562453,	59465655,59467675,59470574,59475307,59476522,59505005,59512619,59525332,59527156,59560962,59562738,	0	Ascc1	cmpl	cmpl	-1,0,1,2,1,0,2,2,1,0,-1,
chr10	59542598	59543408	MACS_peak_663	129.97	INTRAGENIC	NM_001199187	chr10	+	59466074	59562738	59467566	59560957	11	59466074,59467542,59470474,59475209,59476343,59504868,59512499,59525207,59527070,59560840,59562453,	59466164,59467675,59470574,59475307,59476522,59505005,59512619,59525332,59527156,59560962,59562738,	0	Ascc1	cmpl	cmpl	-1,0,1,2,1,0,2,2,1,0,-1,
chr10	59627434	59627935	MACS_peak_664	51.1	DOWNSTREAM	NM_016803	chr10	-	59644275	59682008	59648352	59650978	4	59644275,59650820,59656840,59681651,	59649631,59651066,59656993,59682008,	0	Chst3	cmpl	cmpl	2,0,-1,-1,
chr10	59693396	59694092	MACS_peak_665	172.74	NONE
chr10	60271990	60272596	MACS_peak_666	56.72	TSS	NM_029770	chr10	-	60225342	60294329	60227955	60293913	17	60225342,60229727,60231071,60231855,60234925,60235236,60236491,60237100,60237713,60239932,60240137,60240915,60241531,60242415,60242842,60245805,60293834,	60228121,60229909,60231236,60232005,60235159,60235405,60236579,60237490,60237908,60239965,60240302,60241083,60241712,60242519,60242986,60246030,60294329,	0	Unc5b	cmpl	cmpl	2,0,0,0,0,2,1,1,1,1,1,1,0,1,1,1,0,
chr10	60275158	60275632	MACS_peak_667	53.48	TSS	NM_029770	chr10	-	60225342	60294329	60227955	60293913	17	60225342,60229727,60231071,60231855,60234925,60235236,60236491,60237100,60237713,60239932,60240137,60240915,60241531,60242415,60242842,60245805,60293834,	60228121,60229909,60231236,60232005,60235159,60235405,60236579,60237490,60237908,60239965,60240302,60241083,60241712,60242519,60242986,60246030,60294329,	0	Unc5b	cmpl	cmpl	2,0,0,0,0,2,1,1,1,1,1,1,0,1,1,1,0,
chr10	60461519	60462091	MACS_peak_668	52.4	NONE
chr10	60613160	60614130	MACS_peak_669	281.8	UPSTREAM	NM_001017409	chr10	+	60638009	60643428	60638092	60643117	4	60638009,60638478,60642094,60642995,	60638151,60638726,60642253,60643428,	0	Tbata	cmpl	cmpl	0,2,1,1,
chr10	60613160	60614130	MACS_peak_669	281.8	UPSTREAM	NM_001017419	chr10	+	60634711	60651589	60637159	60651423	10	60634711,60637048,60638478,60642094,60643062,60646047,60648049,60649037,60650424,60651343,	60634780,60637203,60638726,60642253,60643142,60646239,60648131,60649179,60650477,60651589,	0	Tbata	cmpl	cmpl	-1,0,2,1,1,0,0,1,2,1,
chr10	60613160	60614130	MACS_peak_669	281.8	TSS	NM_009163	chr10	-	60561389	60610413	60563615	60609032	15	60561389,60564428,60565315,60565868,60567210,60568169,60569012,60570324,60574909,60576185,60576757,60580442,60586056,60609005,60610270,	60563756,60564549,60565462,60566107,60567360,60568268,60569118,60570413,60575038,60576262,60576905,60580510,60586222,60609079,60610413,	0	Sgpl1	cmpl	cmpl	0,2,2,0,0,0,2,0,0,1,0,1,0,0,-1,
chr10	60695838	60696541	MACS_peak_670	583.11	NONE
chr10	61231195	61231863	MACS_peak_671	80.8	TSS	NM_207000	chr10	-	61201394	61246612	61202044	61220643	9	61201394,61203882,61209380,61210419,61212023,61214424,61216209,61220471,61246530,	61202210,61204057,61209470,61210519,61212134,61214622,61216316,61220702,61246612,	0	H2afy2	cmpl	cmpl	2,1,1,0,0,0,1,0,-1,
chr10	61497019	61497429	MACS_peak_672	68.13	NONE
chr10	62474090	62474784	MACS_peak_673	78.32	INTRAGENIC	NM_027425	chr10	+	62442970	62481490	62443076	62474481	18	62442970,62445418,62451870,62453727,62455864,62456727,62457452,62458057,62460628,62460826,62462980,62464930,62467404,62469372,62470421,62472103,62474165,62474337,	62443080,62445592,62451988,62453829,62455988,62456789,62457518,62458127,62460730,62460943,62463148,62465028,62467524,62469502,62470516,62472152,62474243,62481490,	0	Rufy2	cmpl	cmpl	0,1,1,2,2,0,2,2,0,0,0,0,2,2,0,2,0,0,
chr10	62474090	62474784	MACS_peak_673	78.32	UPSTREAM	NM_026085	chr10	+	62487259	62521560	62501896	62520501	10	62487259,62501836,62510215,62510689,62514948,62515176,62516611,62517074,62519526,62520388,	62487484,62501980,62510315,62510788,62515058,62515206,62516700,62517253,62519589,62521560,	0	Pbld2	cmpl	cmpl	-1,0,0,1,1,0,0,2,1,1,
chr10	62474090	62474784	MACS_peak_673	78.32	DOWNSTREAM	NM_001079824	chr10	-	62477411	62486597	62478385	62482252	10	62477411,62478549,62478827,62479154,62479969,62480271,62480788,62481507,62482140,62486467,	62478462,62478642,62478923,62479290,62480085,62480358,62480973,62481646,62482275,62486597,	0	Hnrnph3	cmpl	cmpl	1,1,1,0,1,1,2,1,0,-1,
chr10	66367469	66367971	MACS_peak_674	51.01	NONE
chr10	66383885	66384599	MACS_peak_675	91.77	NONE
chr10	66465324	66466088	MACS_peak_676	65.15	DOWNSTREAM	NM_001204915	chr10	-	66471936	66559736	66476515	66559569	9	66471936,66476835,66477649,66484496,66497346,66498632,66502248,66525746,66559537,	66476534,66476912,66477795,66484641,66497460,66498753,66502325,66525819,66559736,	0	Reep3	cmpl	cmpl	2,0,1,0,0,2,0,2,0,
chr10	66465324	66466088	MACS_peak_676	65.15	DOWNSTREAM	NM_178606	chr10	-	66471936	66559736	66476477	66559569	8	66471936,66477649,66484496,66497346,66498632,66502248,66525746,66559537,	66476534,66477795,66484641,66497460,66498753,66502325,66525819,66559736,	0	Reep3	cmpl	cmpl	0,1,0,0,2,0,2,0,
chr10	66547951	66548528	MACS_peak_677	52	TSS	NM_001204915	chr10	-	66471936	66559736	66476515	66559569	9	66471936,66476835,66477649,66484496,66497346,66498632,66502248,66525746,66559537,	66476534,66476912,66477795,66484641,66497460,66498753,66502325,66525819,66559736,	0	Reep3	cmpl	cmpl	2,0,1,0,0,2,0,2,0,
chr10	66750504	66751182	MACS_peak_678	58.01	TSS	NM_001036293	chr10	-	66729436	66748029	66730206	66747874	4	66729436,66732853,66738317,66747844,	66730914,66732894,66738402,66748029,	0	Nrbf2	cmpl	cmpl	0,1,0,0,
chr10	66889284	66889917	MACS_peak_679	84.33	NONE
chr10	67097254	67097924	MACS_peak_680	58.63	NONE
chr10	67261963	67262505	MACS_peak_681	54.87	NONE
chr10	67321302	67322198	MACS_peak_682	89.74	NONE
chr10	67566575	67567376	MACS_peak_683	439.8	NONE
chr10	67716633	67717114	MACS_peak_684	52.85	NONE
chr10	67909284	67909974	MACS_peak_685	71.25	NONE
chr10	68433235	68433859	MACS_peak_686	62.39	NONE
chr10	68563504	68564000	MACS_peak_687	59.01	NONE
chr10	68984611	68985210	MACS_peak_688	64.57	UPSTREAM	NM_170729	chr10	+	68996455	69490184	68996969	69478381	41	68996455,69271163,69271620,69271918,69278442,69284955,69287065,69312853,69330132,69333749,69337537,69340577,69342640,69345108,69347494,69347886,69355069,69356192,69360788,69360975,69361741,69366945,69390442,69395141,69413699,69418673,69421665,69436469,69438795,69440460,69441218,69442065,69443019,69444863,69457119,69460842,69462102,69464670,69467357,69478315,69486579,	68997032,69271265,69271719,69272017,69278541,69285141,69287164,69312952,69330231,69333947,69337636,69340676,69342739,69345306,69347593,69347985,69355267,69356291,69360887,69361074,69361837,69367018,69390566,69395244,69413806,69418898,69421820,69436681,69439003,69440557,69441447,69442191,69443142,69444945,69457194,69460974,69462246,69465349,69467739,69478401,69490184,	0	Ank3	cmpl	cmpl	0,0,0,0,0,0,0,0,0,0,0,0,0,0,0,0,0,0,0,0,0,0,1,2,0,2,2,1,0,1,2,0,0,0,1,1,1,1,2,0,-1,
chr10	68984611	68985210	MACS_peak_688	64.57	UPSTREAM	NM_170690	chr10	+	68996455	69490184	68996969	69478381	42	68996455,69271163,69271620,69271918,69278442,69284955,69287065,69312853,69330132,69333749,69337537,69340577,69342640,69345108,69347494,69347886,69355069,69356192,69360788,69360975,69361741,69366945,69383185,69390442,69395141,69413699,69418673,69421665,69436469,69438795,69440460,69441218,69442065,69443019,69444863,69457119,69460842,69462102,69464670,69467357,69478315,69486579,	68997032,69271265,69271719,69272017,69278541,69285141,69287164,69312952,69330231,69333947,69337636,69340676,69342739,69345306,69347593,69347985,69355267,69356291,69360887,69361074,69361837,69367018,69383239,69390566,69395244,69413806,69418898,69421820,69436681,69439003,69440557,69441447,69442191,69443142,69444945,69457194,69460974,69462246,69465349,69467739,69478401,69490184,	0	Ank3	cmpl	cmpl	0,0,0,0,0,0,0,0,0,0,0,0,0,0,0,0,0,0,0,0,0,0,1,1,2,0,2,2,1,0,1,2,0,0,0,1,1,1,1,2,0,-1,
chr10	68984611	68985210	MACS_peak_688	64.57	UPSTREAM	NM_170689	chr10	+	68996455	69490184	68996969	69478381	42	68996455,69271163,69271620,69271918,69278442,69284955,69287065,69312853,69330132,69333749,69337537,69340577,69342640,69345108,69347494,69347886,69355069,69356192,69360788,69360975,69361741,69366945,69367195,69390442,69395141,69413699,69418673,69421665,69436469,69438795,69440460,69441218,69442065,69443019,69444863,69457119,69460842,69462102,69464670,69467357,69478315,69486579,	68997032,69271265,69271719,69272017,69278541,69285141,69287164,69312952,69330231,69333947,69337636,69340676,69342739,69345306,69347593,69347985,69355267,69356291,69360887,69361074,69361837,69367018,69367258,69390566,69395244,69413806,69418898,69421820,69436681,69439003,69440557,69441447,69442191,69443142,69444945,69457194,69460974,69462246,69465349,69467739,69478401,69490184,	0	Ank3	cmpl	cmpl	0,0,0,0,0,0,0,0,0,0,0,0,0,0,0,0,0,0,0,0,0,0,1,1,2,0,2,2,1,0,1,2,0,0,0,1,1,1,1,2,0,-1,
chr10	68984611	68985210	MACS_peak_688	64.57	UPSTREAM	NM_170730	chr10	+	68996455	69490184	68996969	69478381	18	68996455,69413699,69418673,69421665,69436469,69438795,69440460,69441218,69442065,69443019,69444863,69457119,69460842,69462102,69465258,69467357,69478315,69486579,	68997032,69413806,69418898,69421820,69436681,69439003,69440557,69441447,69442191,69443142,69444945,69457194,69460974,69462246,69465349,69467739,69478401,69490184,	0	Ank3	cmpl	cmpl	0,0,2,2,1,0,1,2,0,0,0,1,1,1,1,2,0,-1,
chr10	68984611	68985210	MACS_peak_688	64.57	UPSTREAM	NM_170728	chr10	+	68996455	69490184	68996969	69478381	41	68996455,69271163,69271620,69271918,69278442,69284955,69287065,69312853,69330132,69333749,69337537,69340577,69342640,69345108,69347494,69347886,69355069,69356192,69360788,69360975,69361741,69366945,69390442,69395141,69413699,69418673,69421665,69436469,69438795,69440460,69441218,69442065,69443019,69444863,69457119,69460842,69462102,69465258,69467357,69478315,69486579,	68997032,69271265,69271719,69272017,69278541,69285141,69287164,69312952,69330231,69333947,69337636,69340676,69342739,69345306,69347593,69347985,69355267,69356291,69360887,69361074,69361837,69367018,69390566,69395244,69413806,69418898,69421820,69436681,69439003,69440557,69441447,69442191,69443142,69444945,69457194,69460974,69462246,69465349,69467739,69478401,69490184,	0	Ank3	cmpl	cmpl	0,0,0,0,0,0,0,0,0,0,0,0,0,0,0,0,0,0,0,0,0,0,1,2,0,2,2,1,0,1,2,0,0,0,1,1,1,1,2,0,-1,
chr10	68984611	68985210	MACS_peak_688	64.57	UPSTREAM	NM_170688	chr10	+	68996455	69490184	68996969	69478381	43	68996455,69271163,69271620,69271918,69278442,69284955,69287065,69312853,69330132,69333749,69337537,69340577,69342640,69345108,69347494,69347886,69355069,69356192,69360788,69360975,69361741,69366945,69367195,69383185,69390442,69395141,69413699,69418673,69421665,69436469,69438795,69440460,69441218,69442065,69443019,69444863,69457119,69460842,69462102,69465258,69467357,69478315,69486579,	68997032,69271265,69271719,69272017,69278541,69285141,69287164,69312952,69330231,69333947,69337636,69340676,69342739,69345306,69347593,69347985,69355267,69356291,69360887,69361074,69361837,69367018,69367258,69383239,69390566,69395244,69413806,69418898,69421820,69436681,69439003,69440557,69441447,69442191,69443142,69444945,69457194,69460974,69462246,69465349,69467739,69478401,69490184,	0	Ank3	cmpl	cmpl	0,0,0,0,0,0,0,0,0,0,0,0,0,0,0,0,0,0,0,0,0,0,1,1,1,2,0,2,2,1,0,1,2,0,0,0,1,1,1,1,2,0,-1,
chr10	68984611	68985210	MACS_peak_688	64.57	UPSTREAM	NM_146005	chr10	+	68996455	69490184	68996969	69478381	43	68996455,69271163,69271620,69271918,69278442,69284955,69287065,69312853,69330132,69333749,69337537,69340577,69342640,69345108,69347494,69347886,69355069,69356192,69360788,69360975,69361741,69366945,69367195,69383185,69390442,69395141,69413699,69418673,69421665,69436469,69438795,69440460,69441218,69442065,69443019,69444863,69457119,69460842,69462102,69464670,69467357,69478315,69486579,	68997032,69271265,69271719,69272017,69278541,69285141,69287164,69312952,69330231,69333947,69337636,69340676,69342739,69345306,69347593,69347985,69355267,69356291,69360887,69361074,69361837,69367018,69367258,69383239,69390566,69395244,69413806,69418898,69421820,69436681,69439003,69440557,69441447,69442191,69443142,69444945,69457194,69460974,69462246,69465349,69467739,69478401,69490184,	0	Ank3	cmpl	cmpl	0,0,0,0,0,0,0,0,0,0,0,0,0,0,0,0,0,0,0,0,0,0,1,1,1,2,0,2,2,1,0,1,2,0,0,0,1,1,1,1,2,0,-1,
chr10	68990053	68990573	MACS_peak_689	56.8	UPSTREAM	NM_170729	chr10	+	68996455	69490184	68996969	69478381	41	68996455,69271163,69271620,69271918,69278442,69284955,69287065,69312853,69330132,69333749,69337537,69340577,69342640,69345108,69347494,69347886,69355069,69356192,69360788,69360975,69361741,69366945,69390442,69395141,69413699,69418673,69421665,69436469,69438795,69440460,69441218,69442065,69443019,69444863,69457119,69460842,69462102,69464670,69467357,69478315,69486579,	68997032,69271265,69271719,69272017,69278541,69285141,69287164,69312952,69330231,69333947,69337636,69340676,69342739,69345306,69347593,69347985,69355267,69356291,69360887,69361074,69361837,69367018,69390566,69395244,69413806,69418898,69421820,69436681,69439003,69440557,69441447,69442191,69443142,69444945,69457194,69460974,69462246,69465349,69467739,69478401,69490184,	0	Ank3	cmpl	cmpl	0,0,0,0,0,0,0,0,0,0,0,0,0,0,0,0,0,0,0,0,0,0,1,2,0,2,2,1,0,1,2,0,0,0,1,1,1,1,2,0,-1,
chr10	68990053	68990573	MACS_peak_689	56.8	UPSTREAM	NM_170690	chr10	+	68996455	69490184	68996969	69478381	42	68996455,69271163,69271620,69271918,69278442,69284955,69287065,69312853,69330132,69333749,69337537,69340577,69342640,69345108,69347494,69347886,69355069,69356192,69360788,69360975,69361741,69366945,69383185,69390442,69395141,69413699,69418673,69421665,69436469,69438795,69440460,69441218,69442065,69443019,69444863,69457119,69460842,69462102,69464670,69467357,69478315,69486579,	68997032,69271265,69271719,69272017,69278541,69285141,69287164,69312952,69330231,69333947,69337636,69340676,69342739,69345306,69347593,69347985,69355267,69356291,69360887,69361074,69361837,69367018,69383239,69390566,69395244,69413806,69418898,69421820,69436681,69439003,69440557,69441447,69442191,69443142,69444945,69457194,69460974,69462246,69465349,69467739,69478401,69490184,	0	Ank3	cmpl	cmpl	0,0,0,0,0,0,0,0,0,0,0,0,0,0,0,0,0,0,0,0,0,0,1,1,2,0,2,2,1,0,1,2,0,0,0,1,1,1,1,2,0,-1,
chr10	68990053	68990573	MACS_peak_689	56.8	UPSTREAM	NM_170689	chr10	+	68996455	69490184	68996969	69478381	42	68996455,69271163,69271620,69271918,69278442,69284955,69287065,69312853,69330132,69333749,69337537,69340577,69342640,69345108,69347494,69347886,69355069,69356192,69360788,69360975,69361741,69366945,69367195,69390442,69395141,69413699,69418673,69421665,69436469,69438795,69440460,69441218,69442065,69443019,69444863,69457119,69460842,69462102,69464670,69467357,69478315,69486579,	68997032,69271265,69271719,69272017,69278541,69285141,69287164,69312952,69330231,69333947,69337636,69340676,69342739,69345306,69347593,69347985,69355267,69356291,69360887,69361074,69361837,69367018,69367258,69390566,69395244,69413806,69418898,69421820,69436681,69439003,69440557,69441447,69442191,69443142,69444945,69457194,69460974,69462246,69465349,69467739,69478401,69490184,	0	Ank3	cmpl	cmpl	0,0,0,0,0,0,0,0,0,0,0,0,0,0,0,0,0,0,0,0,0,0,1,1,2,0,2,2,1,0,1,2,0,0,0,1,1,1,1,2,0,-1,
chr10	68990053	68990573	MACS_peak_689	56.8	UPSTREAM	NM_170730	chr10	+	68996455	69490184	68996969	69478381	18	68996455,69413699,69418673,69421665,69436469,69438795,69440460,69441218,69442065,69443019,69444863,69457119,69460842,69462102,69465258,69467357,69478315,69486579,	68997032,69413806,69418898,69421820,69436681,69439003,69440557,69441447,69442191,69443142,69444945,69457194,69460974,69462246,69465349,69467739,69478401,69490184,	0	Ank3	cmpl	cmpl	0,0,2,2,1,0,1,2,0,0,0,1,1,1,1,2,0,-1,
chr10	68990053	68990573	MACS_peak_689	56.8	UPSTREAM	NM_170728	chr10	+	68996455	69490184	68996969	69478381	41	68996455,69271163,69271620,69271918,69278442,69284955,69287065,69312853,69330132,69333749,69337537,69340577,69342640,69345108,69347494,69347886,69355069,69356192,69360788,69360975,69361741,69366945,69390442,69395141,69413699,69418673,69421665,69436469,69438795,69440460,69441218,69442065,69443019,69444863,69457119,69460842,69462102,69465258,69467357,69478315,69486579,	68997032,69271265,69271719,69272017,69278541,69285141,69287164,69312952,69330231,69333947,69337636,69340676,69342739,69345306,69347593,69347985,69355267,69356291,69360887,69361074,69361837,69367018,69390566,69395244,69413806,69418898,69421820,69436681,69439003,69440557,69441447,69442191,69443142,69444945,69457194,69460974,69462246,69465349,69467739,69478401,69490184,	0	Ank3	cmpl	cmpl	0,0,0,0,0,0,0,0,0,0,0,0,0,0,0,0,0,0,0,0,0,0,1,2,0,2,2,1,0,1,2,0,0,0,1,1,1,1,2,0,-1,
chr10	68990053	68990573	MACS_peak_689	56.8	UPSTREAM	NM_170688	chr10	+	68996455	69490184	68996969	69478381	43	68996455,69271163,69271620,69271918,69278442,69284955,69287065,69312853,69330132,69333749,69337537,69340577,69342640,69345108,69347494,69347886,69355069,69356192,69360788,69360975,69361741,69366945,69367195,69383185,69390442,69395141,69413699,69418673,69421665,69436469,69438795,69440460,69441218,69442065,69443019,69444863,69457119,69460842,69462102,69465258,69467357,69478315,69486579,	68997032,69271265,69271719,69272017,69278541,69285141,69287164,69312952,69330231,69333947,69337636,69340676,69342739,69345306,69347593,69347985,69355267,69356291,69360887,69361074,69361837,69367018,69367258,69383239,69390566,69395244,69413806,69418898,69421820,69436681,69439003,69440557,69441447,69442191,69443142,69444945,69457194,69460974,69462246,69465349,69467739,69478401,69490184,	0	Ank3	cmpl	cmpl	0,0,0,0,0,0,0,0,0,0,0,0,0,0,0,0,0,0,0,0,0,0,1,1,1,2,0,2,2,1,0,1,2,0,0,0,1,1,1,1,2,0,-1,
chr10	68990053	68990573	MACS_peak_689	56.8	UPSTREAM	NM_146005	chr10	+	68996455	69490184	68996969	69478381	43	68996455,69271163,69271620,69271918,69278442,69284955,69287065,69312853,69330132,69333749,69337537,69340577,69342640,69345108,69347494,69347886,69355069,69356192,69360788,69360975,69361741,69366945,69367195,69383185,69390442,69395141,69413699,69418673,69421665,69436469,69438795,69440460,69441218,69442065,69443019,69444863,69457119,69460842,69462102,69464670,69467357,69478315,69486579,	68997032,69271265,69271719,69272017,69278541,69285141,69287164,69312952,69330231,69333947,69337636,69340676,69342739,69345306,69347593,69347985,69355267,69356291,69360887,69361074,69361837,69367018,69367258,69383239,69390566,69395244,69413806,69418898,69421820,69436681,69439003,69440557,69441447,69442191,69443142,69444945,69457194,69460974,69462246,69465349,69467739,69478401,69490184,	0	Ank3	cmpl	cmpl	0,0,0,0,0,0,0,0,0,0,0,0,0,0,0,0,0,0,0,0,0,0,1,1,1,2,0,2,2,1,0,1,2,0,0,0,1,1,1,1,2,0,-1,
chr10	69116030	69116451	MACS_peak_690	58.66	TSS	NM_170729	chr10	+	68996455	69490184	68996969	69478381	41	68996455,69271163,69271620,69271918,69278442,69284955,69287065,69312853,69330132,69333749,69337537,69340577,69342640,69345108,69347494,69347886,69355069,69356192,69360788,69360975,69361741,69366945,69390442,69395141,69413699,69418673,69421665,69436469,69438795,69440460,69441218,69442065,69443019,69444863,69457119,69460842,69462102,69464670,69467357,69478315,69486579,	68997032,69271265,69271719,69272017,69278541,69285141,69287164,69312952,69330231,69333947,69337636,69340676,69342739,69345306,69347593,69347985,69355267,69356291,69360887,69361074,69361837,69367018,69390566,69395244,69413806,69418898,69421820,69436681,69439003,69440557,69441447,69442191,69443142,69444945,69457194,69460974,69462246,69465349,69467739,69478401,69490184,	0	Ank3	cmpl	cmpl	0,0,0,0,0,0,0,0,0,0,0,0,0,0,0,0,0,0,0,0,0,0,1,2,0,2,2,1,0,1,2,0,0,0,1,1,1,1,2,0,-1,
chr10	69301999	69302792	MACS_peak_691	62.96	INTRAGENIC	NM_170729	chr10	+	68996455	69490184	68996969	69478381	41	68996455,69271163,69271620,69271918,69278442,69284955,69287065,69312853,69330132,69333749,69337537,69340577,69342640,69345108,69347494,69347886,69355069,69356192,69360788,69360975,69361741,69366945,69390442,69395141,69413699,69418673,69421665,69436469,69438795,69440460,69441218,69442065,69443019,69444863,69457119,69460842,69462102,69464670,69467357,69478315,69486579,	68997032,69271265,69271719,69272017,69278541,69285141,69287164,69312952,69330231,69333947,69337636,69340676,69342739,69345306,69347593,69347985,69355267,69356291,69360887,69361074,69361837,69367018,69390566,69395244,69413806,69418898,69421820,69436681,69439003,69440557,69441447,69442191,69443142,69444945,69457194,69460974,69462246,69465349,69467739,69478401,69490184,	0	Ank3	cmpl	cmpl	0,0,0,0,0,0,0,0,0,0,0,0,0,0,0,0,0,0,0,0,0,0,1,2,0,2,2,1,0,1,2,0,0,0,1,1,1,1,2,0,-1,
chr10	69301999	69302792	MACS_peak_691	62.96	INTRAGENIC	NM_170690	chr10	+	68996455	69490184	68996969	69478381	42	68996455,69271163,69271620,69271918,69278442,69284955,69287065,69312853,69330132,69333749,69337537,69340577,69342640,69345108,69347494,69347886,69355069,69356192,69360788,69360975,69361741,69366945,69383185,69390442,69395141,69413699,69418673,69421665,69436469,69438795,69440460,69441218,69442065,69443019,69444863,69457119,69460842,69462102,69464670,69467357,69478315,69486579,	68997032,69271265,69271719,69272017,69278541,69285141,69287164,69312952,69330231,69333947,69337636,69340676,69342739,69345306,69347593,69347985,69355267,69356291,69360887,69361074,69361837,69367018,69383239,69390566,69395244,69413806,69418898,69421820,69436681,69439003,69440557,69441447,69442191,69443142,69444945,69457194,69460974,69462246,69465349,69467739,69478401,69490184,	0	Ank3	cmpl	cmpl	0,0,0,0,0,0,0,0,0,0,0,0,0,0,0,0,0,0,0,0,0,0,1,1,2,0,2,2,1,0,1,2,0,0,0,1,1,1,1,2,0,-1,
chr10	69301999	69302792	MACS_peak_691	62.96	INTRAGENIC	NM_170689	chr10	+	68996455	69490184	68996969	69478381	42	68996455,69271163,69271620,69271918,69278442,69284955,69287065,69312853,69330132,69333749,69337537,69340577,69342640,69345108,69347494,69347886,69355069,69356192,69360788,69360975,69361741,69366945,69367195,69390442,69395141,69413699,69418673,69421665,69436469,69438795,69440460,69441218,69442065,69443019,69444863,69457119,69460842,69462102,69464670,69467357,69478315,69486579,	68997032,69271265,69271719,69272017,69278541,69285141,69287164,69312952,69330231,69333947,69337636,69340676,69342739,69345306,69347593,69347985,69355267,69356291,69360887,69361074,69361837,69367018,69367258,69390566,69395244,69413806,69418898,69421820,69436681,69439003,69440557,69441447,69442191,69443142,69444945,69457194,69460974,69462246,69465349,69467739,69478401,69490184,	0	Ank3	cmpl	cmpl	0,0,0,0,0,0,0,0,0,0,0,0,0,0,0,0,0,0,0,0,0,0,1,1,2,0,2,2,1,0,1,2,0,0,0,1,1,1,1,2,0,-1,
chr10	69301999	69302792	MACS_peak_691	62.96	TSS	NM_170730	chr10	+	68996455	69490184	68996969	69478381	18	68996455,69413699,69418673,69421665,69436469,69438795,69440460,69441218,69442065,69443019,69444863,69457119,69460842,69462102,69465258,69467357,69478315,69486579,	68997032,69413806,69418898,69421820,69436681,69439003,69440557,69441447,69442191,69443142,69444945,69457194,69460974,69462246,69465349,69467739,69478401,69490184,	0	Ank3	cmpl	cmpl	0,0,2,2,1,0,1,2,0,0,0,1,1,1,1,2,0,-1,
chr10	69335429	69336201	MACS_peak_692	86.11	INTRAGENIC	NM_170729	chr10	+	68996455	69490184	68996969	69478381	41	68996455,69271163,69271620,69271918,69278442,69284955,69287065,69312853,69330132,69333749,69337537,69340577,69342640,69345108,69347494,69347886,69355069,69356192,69360788,69360975,69361741,69366945,69390442,69395141,69413699,69418673,69421665,69436469,69438795,69440460,69441218,69442065,69443019,69444863,69457119,69460842,69462102,69464670,69467357,69478315,69486579,	68997032,69271265,69271719,69272017,69278541,69285141,69287164,69312952,69330231,69333947,69337636,69340676,69342739,69345306,69347593,69347985,69355267,69356291,69360887,69361074,69361837,69367018,69390566,69395244,69413806,69418898,69421820,69436681,69439003,69440557,69441447,69442191,69443142,69444945,69457194,69460974,69462246,69465349,69467739,69478401,69490184,	0	Ank3	cmpl	cmpl	0,0,0,0,0,0,0,0,0,0,0,0,0,0,0,0,0,0,0,0,0,0,1,2,0,2,2,1,0,1,2,0,0,0,1,1,1,1,2,0,-1,
chr10	69335429	69336201	MACS_peak_692	86.11	INTRAGENIC	NM_170690	chr10	+	68996455	69490184	68996969	69478381	42	68996455,69271163,69271620,69271918,69278442,69284955,69287065,69312853,69330132,69333749,69337537,69340577,69342640,69345108,69347494,69347886,69355069,69356192,69360788,69360975,69361741,69366945,69383185,69390442,69395141,69413699,69418673,69421665,69436469,69438795,69440460,69441218,69442065,69443019,69444863,69457119,69460842,69462102,69464670,69467357,69478315,69486579,	68997032,69271265,69271719,69272017,69278541,69285141,69287164,69312952,69330231,69333947,69337636,69340676,69342739,69345306,69347593,69347985,69355267,69356291,69360887,69361074,69361837,69367018,69383239,69390566,69395244,69413806,69418898,69421820,69436681,69439003,69440557,69441447,69442191,69443142,69444945,69457194,69460974,69462246,69465349,69467739,69478401,69490184,	0	Ank3	cmpl	cmpl	0,0,0,0,0,0,0,0,0,0,0,0,0,0,0,0,0,0,0,0,0,0,1,1,2,0,2,2,1,0,1,2,0,0,0,1,1,1,1,2,0,-1,
chr10	69335429	69336201	MACS_peak_692	86.11	INTRAGENIC	NM_170689	chr10	+	68996455	69490184	68996969	69478381	42	68996455,69271163,69271620,69271918,69278442,69284955,69287065,69312853,69330132,69333749,69337537,69340577,69342640,69345108,69347494,69347886,69355069,69356192,69360788,69360975,69361741,69366945,69367195,69390442,69395141,69413699,69418673,69421665,69436469,69438795,69440460,69441218,69442065,69443019,69444863,69457119,69460842,69462102,69464670,69467357,69478315,69486579,	68997032,69271265,69271719,69272017,69278541,69285141,69287164,69312952,69330231,69333947,69337636,69340676,69342739,69345306,69347593,69347985,69355267,69356291,69360887,69361074,69361837,69367018,69367258,69390566,69395244,69413806,69418898,69421820,69436681,69439003,69440557,69441447,69442191,69443142,69444945,69457194,69460974,69462246,69465349,69467739,69478401,69490184,	0	Ank3	cmpl	cmpl	0,0,0,0,0,0,0,0,0,0,0,0,0,0,0,0,0,0,0,0,0,0,1,1,2,0,2,2,1,0,1,2,0,0,0,1,1,1,1,2,0,-1,
chr10	69335429	69336201	MACS_peak_692	86.11	TSS	NM_170730	chr10	+	68996455	69490184	68996969	69478381	18	68996455,69413699,69418673,69421665,69436469,69438795,69440460,69441218,69442065,69443019,69444863,69457119,69460842,69462102,69465258,69467357,69478315,69486579,	68997032,69413806,69418898,69421820,69436681,69439003,69440557,69441447,69442191,69443142,69444945,69457194,69460974,69462246,69465349,69467739,69478401,69490184,	0	Ank3	cmpl	cmpl	0,0,2,2,1,0,1,2,0,0,0,1,1,1,1,2,0,-1,
chr10	69619449	69620117	MACS_peak_693	51.97	INTRAGENIC	NM_001111121	chr10	+	69559868	69655948	69560047	69652026	9	69559868,69605326,69617455,69629749,69631839,69637758,69644907,69650438,69651825,	69560329,69605476,69617584,69629853,69632000,69637915,69645008,69650563,69655948,	0	Ccdc6	cmpl	cmpl	0,0,0,0,2,1,2,1,0,
chr10	71121858	71122429	MACS_peak_694	52.48	NONE
chr10	71417185	71417756	MACS_peak_695	52.48	DOWNSTREAM	NR_003644	chr10	-	71442632	71443438	71443438	71443438	1	71442632,	71443438,	0	1700049L16Rik	unk	unk	-1,
chr10	73476364	73476820	MACS_peak_696	55.16	INTRAGENIC	NM_001142760	chr10	+	73284614	74112477	73409803	74108817	34	73284614,73409775,73514345,73633196,73648021,73673111,73685104,73692954,73753711,73765838,73779707,73787102,73788799,73805247,73818602,73842077,73848611,73859095,73912900,73916621,73929026,73944781,73948952,73965430,73967412,74013201,74046757,74056904,74083943,74086949,74088891,74089431,74105026,74108265,	73285007,73409894,73514411,73633357,73648177,73673231,73685215,73693125,73753820,73765951,73779914,73787237,73788949,73805441,73818735,73842157,73848705,73859224,73913206,73916846,73929143,73944922,73949065,73965540,73967553,74013329,74046973,74056993,74084120,74087168,74088900,74089588,74105135,74112477,	0	Pcdh15	cmpl	cmpl	-1,0,1,1,0,0,0,0,0,1,0,0,0,0,2,0,2,0,0,0,0,0,0,2,1,1,0,0,2,2,2,2,2,0,
chr10	73476364	73476820	MACS_peak_696	55.16	INTRAGENIC	NM_001142742	chr10	+	73284614	74107472	73409803	74106963	36	73284614,73409775,73513840,73514345,73633196,73648021,73673111,73685104,73692954,73753711,73765838,73779707,73784182,73787102,73788799,73805247,73818602,73842077,73848611,73859095,73912900,73916621,73929026,73944781,73948952,73965430,73967412,74013201,74046757,74056904,74083943,74086949,74088891,74089431,74105026,74106108,	73285007,73409894,73513855,73514411,73633357,73648177,73673231,73685215,73693125,73753820,73765951,73779914,73784203,73787237,73788949,73805441,73818735,73842157,73848705,73859224,73913206,73916846,73929143,73944922,73949065,73965540,73967553,74013329,74046973,74056993,74084120,74087168,74088900,74089588,74105135,74107472,	0	Pcdh15	cmpl	cmpl	-1,0,1,1,1,0,0,0,0,0,1,0,0,0,0,0,2,0,2,0,0,0,0,0,0,2,1,1,0,0,2,2,2,2,2,0,
chr10	73476364	73476820	MACS_peak_696	55.16	INTRAGENIC	NM_001142738	chr10	+	73284614	74097510	73409803	74094699	31	73284614,73409775,73514345,73633196,73648021,73673111,73692954,73753711,73765838,73779707,73787102,73788799,73805247,73818602,73842077,73848611,73859095,73912900,73916621,73929026,73944781,73948952,73965430,73967412,74013201,74046757,74056904,74083943,74086949,74089431,74093255,	73285007,73409894,73514411,73633357,73648177,73673231,73693125,73753820,73765951,73779914,73787237,73788949,73805441,73818735,73842157,73848705,73859224,73913206,73916846,73929143,73944922,73949065,73965540,73967553,74013329,74046973,74056993,74084120,74087168,74089587,74097510,	0	Pcdh15	cmpl	cmpl	-1,0,1,1,0,0,0,0,1,0,0,0,0,2,0,2,0,0,0,0,0,0,2,1,1,0,0,2,2,2,2,
chr10	73476364	73476820	MACS_peak_696	55.16	INTRAGENIC	NM_001142740	chr10	+	73284614	74097510	73409803	74094699	32	73284614,73409775,73514345,73633196,73648021,73673111,73685104,73692954,73753711,73765838,73779707,73787102,73788799,73805247,73818602,73842077,73848611,73859095,73912900,73916621,73929026,73944781,73948952,73965430,73967412,74013201,74046757,74056904,74083943,74086949,74089431,74093255,	73285007,73409894,73514411,73633357,73648177,73673231,73685215,73693125,73753820,73765951,73779914,73787237,73788949,73805441,73818735,73842157,73848705,73859224,73913206,73916846,73929143,73944922,73949065,73965540,73967553,74013329,74046973,74056993,74084120,74087168,74089587,74097510,	0	Pcdh15	cmpl	cmpl	-1,0,1,1,0,0,0,0,0,1,0,0,0,0,2,0,2,0,0,0,0,0,0,2,1,1,0,0,2,2,2,2,
chr10	73476364	73476820	MACS_peak_696	55.16	INTRAGENIC	NM_023115	chr10	+	73284614	74097510	73409803	74094699	34	73284614,73409775,73513840,73514345,73633196,73648021,73673111,73685104,73692954,73753711,73765838,73779707,73787102,73788799,73805247,73818602,73842077,73848611,73859095,73912900,73916621,73929026,73944781,73948952,73965430,73967412,74013201,74046757,74056904,74083943,74086949,74088891,74089431,74093255,	73285007,73409894,73513855,73514411,73633357,73648177,73673231,73685215,73693125,73753820,73765951,73779914,73787237,73788949,73805441,73818735,73842157,73848705,73859224,73913206,73916846,73929143,73944922,73949065,73965540,73967553,74013329,74046973,74056993,74084120,74087168,74088900,74089588,74097510,	0	Pcdh15	cmpl	cmpl	-1,0,1,1,1,0,0,0,0,0,1,0,0,0,0,2,0,2,0,0,0,0,0,0,2,1,1,0,0,2,2,2,2,2,
chr10	73476364	73476820	MACS_peak_696	55.16	INTRAGENIC	NM_001142739	chr10	+	73284614	74097510	73409803	74094699	32	73284614,73409775,73633196,73648021,73673111,73685104,73692954,73753711,73765838,73779707,73787102,73788799,73805247,73818602,73842077,73848611,73859095,73912900,73916621,73929026,73944781,73948952,73965430,73967412,74013201,74046757,74056904,74083943,74086949,74088891,74089431,74093255,	73285007,73409894,73633357,73648177,73673231,73685215,73693125,73753820,73765951,73779914,73787237,73788949,73805441,73818735,73842157,73848705,73859224,73913206,73916846,73929143,73944922,73949065,73965540,73967553,74013329,74046973,74056993,74084120,74087168,74088900,74089588,74097510,	0	Pcdh15	cmpl	cmpl	-1,0,1,0,0,0,0,0,1,0,0,0,0,2,0,2,0,0,0,0,0,0,2,1,1,0,0,2,2,2,2,2,
chr10	73476364	73476820	MACS_peak_696	55.16	INTRAGENIC	NM_001142747	chr10	+	73284614	73970345	73409803	73969343	27	73284614,73409775,73513840,73514345,73633196,73648021,73673111,73685104,73692954,73753711,73765838,73779707,73787102,73788799,73805247,73818602,73842077,73848611,73859095,73912900,73916621,73929026,73944781,73948952,73965430,73967412,73969200,	73285007,73409894,73513855,73514411,73633357,73648177,73673231,73685215,73693125,73753820,73765951,73779914,73787237,73788949,73805441,73818735,73842157,73848705,73859224,73913206,73916846,73929143,73944922,73949065,73965540,73967553,73970345,	0	Pcdh15	cmpl	cmpl	-1,0,1,1,1,0,0,0,0,0,1,0,0,0,0,2,0,2,0,0,0,0,0,0,2,1,1,
chr10	73476364	73476820	MACS_peak_696	55.16	INTRAGENIC	NM_001142736	chr10	+	73284614	74097510	73409803	74094699	33	73284614,73409775,73514345,73633196,73648021,73673111,73685104,73692954,73753711,73765838,73779707,73787102,73788799,73805247,73818602,73842077,73848611,73859095,73912900,73916621,73929026,73944781,73948952,73965430,73967412,74013201,74046757,74056904,74083943,74086949,74088891,74089431,74093255,	73285007,73409894,73514411,73633357,73648177,73673231,73685215,73693125,73753820,73765951,73779914,73787237,73788949,73805441,73818735,73842157,73848705,73859224,73913206,73916846,73929143,73944922,73949065,73965540,73967553,74013329,74046973,74056993,74084120,74087168,74088900,74089587,74097510,	0	Pcdh15	cmpl	cmpl	-1,0,1,1,0,0,0,0,0,1,0,0,0,0,2,0,2,0,0,0,0,0,0,2,1,1,0,0,2,2,2,2,2,
chr10	73476364	73476820	MACS_peak_696	55.16	INTRAGENIC	NM_001142743	chr10	+	73284614	74107472	73409803	74106112	35	73284614,73409775,73514345,73633196,73648021,73673111,73685104,73692954,73753711,73765838,73779707,73787102,73788799,73805247,73818602,73842077,73848611,73859095,73912900,73916621,73929026,73944781,73948952,73965430,73967412,74013201,74046757,74056904,74083943,74086949,74088891,74089431,74104081,74105026,74106108,	73285007,73409894,73514411,73633357,73648177,73673231,73685215,73693125,73753820,73765951,73779914,73787237,73788949,73805441,73818735,73842157,73848705,73859224,73913206,73916846,73929143,73944922,73949065,73965540,73967553,74013329,74046973,74056993,74084120,74087168,74088900,74089587,74104158,74105135,74107472,	0	Pcdh15	cmpl	cmpl	-1,0,1,1,0,0,0,0,0,1,0,0,0,0,2,0,2,0,0,0,0,0,0,2,1,1,0,0,2,2,2,2,2,1,2,
chr10	73476364	73476820	MACS_peak_696	55.16	INTRAGENIC	NM_001142741	chr10	+	73284614	74097510	73409803	74094699	31	73284614,73409775,73633196,73648021,73673111,73685104,73692954,73753711,73765838,73779707,73787102,73788799,73805247,73818602,73842077,73848611,73859095,73912900,73916621,73929026,73944781,73948952,73965430,73967412,74013201,74046757,74056904,74083943,74086949,74089431,74093255,	73285007,73409894,73633357,73648177,73673231,73685215,73693125,73753820,73765951,73779914,73787237,73788949,73805441,73818735,73842157,73848705,73859224,73913206,73916846,73929143,73944922,73949065,73965540,73967553,74013329,74046973,74056993,74084120,74087168,74089588,74097510,	0	Pcdh15	cmpl	cmpl	-1,0,1,0,0,0,0,0,1,0,0,0,0,2,0,2,0,0,0,0,0,0,2,1,1,0,0,2,2,2,2,
chr10	73476364	73476820	MACS_peak_696	55.16	INTRAGENIC	NM_001142737	chr10	+	73284614	74097510	73409803	74094699	31	73284614,73409775,73514345,73633196,73648021,73673111,73685104,73692954,73753711,73765838,73779707,73787102,73788799,73805247,73848611,73859095,73912900,73916621,73929026,73944781,73948952,73965430,73967412,74013201,74046757,74056904,74083943,74086949,74088891,74089431,74093255,	73285007,73409894,73514411,73633357,73648177,73673231,73685215,73693125,73753820,73765951,73779914,73787237,73788949,73805441,73848705,73859224,73913206,73916846,73929143,73944922,73949065,73965540,73967553,74013329,74046973,74056993,74084120,74087168,74088900,74089588,74097510,	0	Pcdh15	cmpl	cmpl	-1,0,1,1,0,0,0,0,0,1,0,0,0,0,2,0,0,0,0,0,0,2,1,1,0,0,2,2,2,2,2,
chr10	73476364	73476820	MACS_peak_696	55.16	INTRAGENIC	NM_001142748	chr10	+	73284614	73970345	73409803	73969343	26	73284614,73409775,73514345,73633196,73648021,73673111,73685104,73692954,73753711,73765838,73779707,73787102,73788799,73805247,73818602,73842077,73848611,73859095,73912900,73916621,73929026,73944781,73948952,73965430,73967412,73969200,	73285007,73409894,73514411,73633357,73648177,73673231,73685215,73693125,73753820,73765951,73779914,73787237,73788949,73805441,73818735,73842157,73848705,73859224,73913206,73916846,73929143,73944922,73949065,73965540,73967553,73970345,	0	Pcdh15	cmpl	cmpl	-1,0,1,1,0,0,0,0,0,1,0,0,0,0,2,0,2,0,0,0,0,0,0,2,1,1,
chr10	73476364	73476820	MACS_peak_696	55.16	INTRAGENIC	NM_001142746	chr10	+	73284614	74112477	73409803	74108817	35	73284614,73409775,73513840,73514345,73633196,73648021,73673111,73685104,73692954,73753711,73765838,73779707,73787102,73788799,73805247,73818602,73842077,73848611,73859095,73912900,73916621,73929026,73944781,73948952,73965430,73967412,74013201,74046757,74056904,74083943,74086949,74088891,74089431,74105026,74108265,	73285007,73409894,73513855,73514411,73633357,73648177,73673231,73685215,73693125,73753820,73765951,73779914,73787237,73788949,73805441,73818735,73842157,73848705,73859224,73913206,73916846,73929143,73944922,73949065,73965540,73967553,74013329,74046973,74056993,74084120,74087168,74088900,74089588,74105135,74112477,	0	Pcdh15	cmpl	cmpl	-1,0,1,1,1,0,0,0,0,0,1,0,0,0,0,2,0,2,0,0,0,0,0,0,2,1,1,0,0,2,2,2,2,2,0,
chr10	73476364	73476820	MACS_peak_696	55.16	INTRAGENIC	NM_001142735	chr10	+	73284614	74097510	73409803	74094699	33	73284614,73409775,73514345,73633196,73648021,73673111,73685104,73692954,73753711,73765838,73779707,73787102,73788799,73805247,73818602,73842077,73848611,73859095,73912900,73916621,73929026,73944781,73948952,73965430,73967412,74013201,74046757,74056904,74083943,74086949,74088891,74089431,74093255,	73285007,73409894,73514411,73633357,73648177,73673231,73685215,73693125,73753820,73765951,73779914,73787237,73788949,73805441,73818735,73842157,73848705,73859224,73913206,73916846,73929143,73944922,73949065,73965540,73967553,74013329,74046973,74056993,74084120,74087168,74088900,74089588,74097510,	0	Pcdh15	cmpl	cmpl	-1,0,1,1,0,0,0,0,0,1,0,0,0,0,2,0,2,0,0,0,0,0,0,2,1,1,0,0,2,2,2,2,2,
chr10	75051697	75052450	MACS_peak_697	154.85	TSS	NM_011820	chr10	+	75052125	75079713	75052454	75077627	12	75052125,75065364,75065718,75066711,75067387,75068000,75071495,75071943,75072589,75072857,75073172,75077474,	75052627,75065495,75065814,75066907,75067545,75068147,75071632,75072137,75072696,75072976,75073283,75079713,	0	Ggt5	cmpl	cmpl	0,2,1,1,2,1,1,0,2,1,0,0,
chr10	75142211	75142751	MACS_peak_698	62.48	NONE
chr10	75204845	75205347	MACS_peak_699	51.01	NONE
chr10	75226700	75227302	MACS_peak_700	50.08	TSS	NM_172549	chr10	-	75108854	75227102	75109288	75218116	37	75108854,75109619,75110801,75115619,75118110,75119519,75120540,75121378,75147036,75157459,75162657,75176197,75178343,75180182,75184022,75188003,75188293,75189602,75195144,75196364,75197710,75200065,75200955,75202070,75202764,75204989,75205946,75207973,75209232,75210570,75212788,75214180,75216121,75216995,75217556,75218113,75226769,	75109432,75109846,75110966,75115887,75118185,75120197,75120637,75121542,75147150,75157791,75162840,75176376,75178495,75180443,75184284,75188149,75188500,75189764,75195260,75196521,75197953,75200260,75201108,75202258,75202843,75205207,75206083,75208142,75209519,75210720,75212918,75214361,75216256,75217109,75217649,75218245,75227102,	0	Cabin1	cmpl	cmpl	0,1,1,0,0,0,2,0,0,1,1,2,0,0,2,0,0,0,1,0,0,0,0,1,0,1,2,1,2,2,1,0,0,0,0,0,-1,
chr10	75394632	75395217	MACS_peak_701	51.37	UPSTREAM	NM_198635	chr10	+	75417258	75472334	75417316	75471572	14	75417258,75427160,75429095,75436925,75439056,75441053,75448664,75455139,75456569,75458524,75463133,75467439,75468734,75471246,	75417445,75427265,75429155,75437030,75439162,75441134,75448885,75455275,75456677,75458675,75463302,75467655,75468837,75472334,	0	Gm5134	cmpl	cmpl	0,0,0,0,0,1,1,0,1,1,2,0,0,1,
chr10	75394632	75395217	MACS_peak_701	51.37	UPSTREAM	NM_009514	chr10	+	75411056	75412391	75411102	75412207	2	75411056,75411887,	75411154,75412391,	0	Vpreb3	cmpl	cmpl	0,1,
chr10	75394632	75395217	MACS_peak_701	51.37	TSS	NM_008606	chr10	-	75385968	75395208	75386726	75395198	8	75385968,75388164,75389155,75389492,75389873,75390091,75391024,75395078,	75386860,75388422,75389372,75389734,75390007,75390235,75391254,75395208,	0	Mmp11	cmpl	cmpl	1,1,0,1,2,2,0,0,
chr10	75799180	75799899	MACS_peak_702	76.04	DOWNSTREAM	NM_008787	chr10	-	75813998	75905657	75814483	75905363	42	75813998,75815653,75816917,75817803,75818908,75819779,75830052,75831475,75832579,75837595,75842649,75842907,75843977,75844764,75847485,75848448,75850171,75851596,75854938,75862600,75864076,75866368,75866502,75867166,75871442,75872212,75874270,75874765,75875242,75881104,75882722,75885512,75889629,75890557,75891944,75895748,75896351,75896729,75899170,75899889,75902887,75905309,	75814524,75815781,75817056,75817880,75819141,75819899,75830226,75831578,75832824,75838045,75842800,75843184,75844170,75844932,75847650,75848615,75850274,75852277,75855784,75862771,75864280,75866389,75866619,75867396,75871655,75872375,75874503,75874917,75875394,75881311,75883287,75885970,75889717,75890798,75892056,75895885,75896526,75896785,75899426,75899961,75903100,75905657,	0	Pcnt	cmpl	cmpl	1,2,1,2,0,0,0,2,0,0,2,1,0,0,0,1,0,0,0,0,0,0,0,1,1,0,1,2,0,0,2,0,2,1,0,1,0,1,0,0,0,0,
chr10	75799180	75799899	MACS_peak_702	76.04	TSS	NM_001081419	chr10	-	75725793	75808036	75727365	75807942	38	75725793,75728242,75729061,75731236,75732848,75733140,75735277,75735779,75736893,75737733,75739073,75739328,75741232,75742450,75742601,75743420,75745257,75748270,75749106,75750057,75753752,75755056,75757238,75758811,75759097,75760499,75760997,75761414,75762647,75764948,75767756,75769817,75775920,75780611,75782211,75784234,75790446,75807851,	75727618,75728366,75729236,75731311,75732906,75733202,75735448,75735948,75737024,75737843,75739185,75739450,75741356,75742531,75742711,75743622,75745372,75748398,75749187,75750194,75753892,75755171,75757358,75758905,75759162,75760602,75761107,75761538,75762758,75765036,75767958,75769937,75776049,75780839,75782331,75784351,75790518,75808036,	0	Dip2a	cmpl	cmpl	2,1,0,0,2,0,0,2,0,1,0,1,0,0,1,0,2,0,0,1,2,1,1,0,1,0,1,0,0,2,1,1,1,1,1,1,1,0,
chr10	75905486	75906073	MACS_peak_703	51.22	TSS	NM_008787	chr10	-	75813998	75905657	75814483	75905363	42	75813998,75815653,75816917,75817803,75818908,75819779,75830052,75831475,75832579,75837595,75842649,75842907,75843977,75844764,75847485,75848448,75850171,75851596,75854938,75862600,75864076,75866368,75866502,75867166,75871442,75872212,75874270,75874765,75875242,75881104,75882722,75885512,75889629,75890557,75891944,75895748,75896351,75896729,75899170,75899889,75902887,75905309,	75814524,75815781,75817056,75817880,75819141,75819899,75830226,75831578,75832824,75838045,75842800,75843184,75844170,75844932,75847650,75848615,75850274,75852277,75855784,75862771,75864280,75866389,75866619,75867396,75871655,75872375,75874503,75874917,75875394,75881311,75883287,75885970,75889717,75890798,75892056,75895885,75896526,75896785,75899426,75899961,75903100,75905657,	0	Pcnt	cmpl	cmpl	1,2,1,2,0,0,0,2,0,0,2,1,0,0,0,1,0,0,0,0,0,0,0,1,1,0,1,2,0,0,2,0,2,1,0,1,0,1,0,0,0,0,
chr10	76458383	76459025	MACS_peak_704	53.89	UPSTREAM	NR_045882	chr10	+	76474739	76484959	76484959	76484959	3	76474739,76479395,76483979,	76475133,76479569,76484959,	0	Gm10787	unk	unk	-1,-1,-1,
chr10	76630725	76631082	MACS_peak_705	117.84	TSS	NM_009929	chr10	-	76514923	76629275	76515938	76629194	42	76514923,76516899,76517528,76518323,76520113,76521443,76521849,76522002,76522639,76523113,76526723,76527281,76527979,76529694,76530123,76530376,76531134,76532180,76532564,76532694,76533705,76534055,76534348,76534771,76535686,76536484,76537094,76538892,76539903,76540428,76540743,76541020,76541201,76542005,76543423,76543893,76548011,76550120,76551614,76558735,76629034,76629183,	76516152,76517015,76517726,76518572,76520146,76521575,76521923,76522147,76522768,76523157,76526786,76527324,76528048,76529769,76530177,76530403,76531209,76532243,76532591,76532724,76533795,76534091,76534420,76534807,76535713,76536547,76537226,76538919,76539966,76540587,76540797,76541098,76541264,76542032,76543609,76543970,76548141,76550174,76551701,76559280,76629105,76629275,	0	Col18a1	cmpl	cmpl	2,0,0,0,0,0,1,0,0,1,1,0,0,0,0,0,0,0,0,0,0,0,0,0,0,0,0,0,0,0,0,0,0,0,0,1,0,0,0,1,2,0,
chr10	76664614	76665189	MACS_peak_706	116.75	NONE
chr10	76706944	76707560	MACS_peak_707	70.51	UPSTREAM	NM_030262	chr10	+	76722044	76732331	76722067	76731425	9	76722044,76723318,76725181,76726009,76727700,76728580,76729657,76729928,76731271,	76722198,76723569,76725326,76726120,76727767,76728706,76729838,76730052,76732331,	0	Pofut2	cmpl	cmpl	0,2,1,2,2,0,0,1,2,
chr10	76706944	76707560	MACS_peak_707	70.51	DOWNSTREAM	NR_026944	chr10	-	76720517	76721968	76721968	76721968	2	76720517,76721471,	76720731,76721968,	0	Gm10941	unk	unk	-1,-1,
chr10	76717019	76717831	MACS_peak_708	97.51	TSS	NM_030262	chr10	+	76722044	76732331	76722067	76731425	9	76722044,76723318,76725181,76726009,76727700,76728580,76729657,76729928,76731271,	76722198,76723569,76725326,76726120,76727767,76728706,76729838,76730052,76732331,	0	Pofut2	cmpl	cmpl	0,2,1,2,2,0,0,1,2,
chr10	76762370	76762939	MACS_peak_709	52.64	NONE
chr10	76928653	76929333	MACS_peak_710	111.87	DOWNSTREAM	NM_133998	chr10	-	76949399	76978558	76951094	76978485	6	76949399,76952742,76960107,76966590,76977050,76978347,	76951218,76952811,76960258,76966659,76977159,76978558,	0	1810008A18Rik	cmpl	cmpl	2,2,1,1,0,0,
chr10	77326073	77326710	MACS_peak_711	61.29	DOWNSTREAM	NM_001101631	chr10	+	77324719	77325383	77324763	77325369	1	77324719,	77325383,	0	Gm3285	cmpl	cmpl	0,
chr10	77326073	77326710	MACS_peak_711	61.29	DOWNSTREAM	NM_001162944	chr10	+	77315603	77316533	77315606	77316284	1	77315603,	77316533,	0	Gm10318	cmpl	cmpl	0,
chr10	77433867	77434514	MACS_peak_712	53.52	DOWNSTREAM	NM_008826	chr10	-	77449693	77472541	77450954	77472428	22	77449693,77451419,77451609,77452310,77452634,77452886,77453416,77454098,77454760,77455136,77456126,77456880,77457988,77459064,77460268,77462570,77462879,77463420,77464055,77464754,77468185,77472343,	77451102,77451525,77451709,77452422,77452696,77453051,77453569,77454186,77454831,77455283,77456190,77456945,77458114,77459157,77460364,77462679,77462924,77463586,77464245,77464832,77468259,77472541,	0	Pfkl	cmpl	cmpl	2,1,0,2,0,0,0,2,0,0,2,0,0,0,0,2,2,1,0,0,1,0,
chr10	77433867	77434514	MACS_peak_712	53.52	UPSTREAM	NM_026431	chr10	+	77441394	77448183	77441449	77447292	7	77441394,77442497,77443245,77444328,77445614,77446260,77447163,	77441526,77442516,77443292,77444558,77445786,77446336,77448183,	0	1810043G02Rik	cmpl	cmpl	0,2,0,2,1,2,0,
chr10	77433867	77434514	MACS_peak_712	53.52	TSS	NM_138301	chr10	-	77370466	77432617	77372920	77429757	34	77370466,77374033,77375322,77376549,77377456,77380451,77380824,77381609,77382362,77383189,77386241,77386726,77388422,77391957,77392573,77393280,77394879,77396318,77397425,77397789,77398622,77400536,77401071,77403891,77405663,77406666,77408579,77410614,77411928,77422616,77428723,77429595,77431901,77432527,	77373067,77374150,77375424,77376655,77377543,77380553,77380898,77381767,77382450,77383277,77386374,77386908,77388606,77392129,77392706,77393399,77395093,77396431,77397571,77397919,77398760,77400887,77401193,77403994,77405864,77406728,77408760,77410781,77412109,77422785,77428812,77429841,77432044,77432617,	0	Trpm2	cmpl	cmpl	0,0,0,2,2,2,0,1,0,2,1,2,1,0,2,0,2,0,1,0,0,0,1,0,0,1,0,1,0,2,0,0,-1,-1,
chr10	78037117	78037852	MACS_peak_713	53.84	DOWNSTREAM	NM_027875	chr10	-	78047247	78054709	78048246	78054634	8	78047247,78048834,78049703,78050075,78051451,78051845,78052646,78054546,	78048656,78049060,78049864,78050202,78051666,78052490,78052988,78054709,	0	Syde1	cmpl	cmpl	1,0,1,0,1,1,1,0,
chr10	78037117	78037852	MACS_peak_713	53.84	TSS	NM_173751	chr10	+	78037244	78047247	78037841	78046993	16	78037244,78037831,78039326,78039644,78039855,78040086,78041765,78042207,78042410,78043800,78045759,78045964,78046208,78046374,78046622,78046814,	78037410,78037976,78039528,78039772,78039994,78040198,78041865,78042305,78042547,78043935,78045874,78046134,78046279,78046446,78046728,78047247,	0	Ilvbl	cmpl	cmpl	-1,0,0,1,0,1,2,0,2,1,1,2,1,0,0,1,
chr10	79226815	79227596	MACS_peak_714	63.85	UPSTREAM	NM_031380	chr10	+	79240018	79245375	79240045	79244220	5	79240018,79241307,79242709,79243868,79244176,	79240142,79241493,79242925,79244096,79245375,	0	Fstl3	cmpl	cmpl	0,1,1,1,1,
chr10	79226815	79227596	MACS_peak_714	63.85	TSS	NM_144528	chr10	-	79221259	79229697	79221831	79229572	9	79221259,79223535,79223733,79224174,79224309,79224829,79225226,79225391,79229497,	79221981,79223651,79223827,79224244,79224378,79225074,79225290,79225450,79229697,	0	Rnf126	cmpl	cmpl	0,1,0,2,2,0,2,0,0,
chr10	79316136	79317151	MACS_peak_715	101.19	DOWNSTREAM	NM_181681	chr10	-	79327525	79337379	79327600	79336839	7	79327525,79329156,79329412,79329579,79329916,79330132,79336764,	79328926,79329330,79329470,79329775,79330052,79330318,79337379,	0	BC005764	cmpl	cmpl	0,0,2,1,0,0,0,
chr10	79316136	79317151	MACS_peak_715	101.19	DOWNSTREAM	NM_001170935	chr10	-	79323219	79337379	79324441	79336839	9	79323219,79325179,79328532,79329156,79329412,79329579,79329916,79330132,79336764,	79324541,79325225,79328926,79329330,79329470,79329775,79330052,79330318,79337379,	0	BC005764	cmpl	cmpl	2,1,0,0,2,1,0,0,0,
chr10	79316136	79317151	MACS_peak_715	101.19	DOWNSTREAM	NR_033210	chr10	-	79327525	79337379	79337379	79337379	6	79327525,79329156,79329412,79329579,79330132,79336764,	79328926,79329330,79329470,79330052,79330318,79337379,	0	BC005764	unk	unk	-1,-1,-1,-1,-1,-1,
chr10	79316136	79317151	MACS_peak_715	101.19	TSS	NR_029447	chr10	-	79314121	79317716	79317716	79317716	1	79314121,	79317716,	0	E130317F20Rik	unk	unk	-1,
chr10	79447356	79447913	MACS_peak_716	53.61	DOWNSTREAM	NM_175450	chr10	+	79422896	79431991	79422907	79430344	10	79422896,79423746,79427670,79427954,79428724,79428950,79429089,79429304,79430064,79430215,	79423117,79423857,79427804,79428096,79428868,79429015,79429214,79429471,79430133,79431991,	0	Wdr18	cmpl	cmpl	0,0,0,2,0,0,2,1,0,0,
chr10	79447356	79447913	MACS_peak_716	53.61	UPSTREAM	NM_013850	chr10	+	79460359	79478317	79460359	79478203	46	79460359,79460513,79460758,79460988,79461195,79461501,79462125,79462425,79463456,79463667,79464234,79464779,79465251,79465575,79465876,79466541,79467125,79467463,79467698,79468387,79468732,79468996,79469177,79469630,79469880,79470068,79470398,79470607,79470889,79471283,79471407,79471672,79472602,79472895,79473780,79474019,79474457,79474659,79474868,79476056,79476363,79476590,79476973,79477212,794…	79460425,79460607,79460900,79461101,79461269,79461582,79462336,79462565,79463573,79463835,79464464,79464956,79465474,79465797,79466078,79466652,79467297,79467595,79467838,79468525,79468920,79469054,79469455,79469667,79469973,79470196,79470523,79470706,79471177,79471316,79471585,79471842,79472780,79473011,79473925,79474143,79474587,79474780,79474931,79476163,79476505,79476725,79477077,79477305,794…	0	Abca7	cmpl	cmpl	0,0,1,2,1,0,0,1,0,0,0,2,2,0,0,1,1,2,2,1,1,0,1,0,1,1,0,2,2,2,2,0,2,0,2,0,1,2,0,0,2,0,0,2,2,0,
chr10	79447356	79447913	MACS_peak_716	53.61	DOWNSTREAM	NM_130455	chr10	+	79433468	79439935	79433644	79439849	9	79433468,79435588,79436425,79438378,79438605,79438798,79439138,79439379,79439536,	79434070,79436181,79437458,79438524,79438721,79438950,79439303,79439447,79439935,	0	Grin3b	cmpl	cmpl	0,0,2,0,2,1,0,0,2,
chr10	79447356	79447913	MACS_peak_716	53.61	TSS	NM_001003949	chr10	-	79439864	79447075	79440163	79446876	11	79439864,79440707,79440932,79441136,79441292,79441437,79441612,79441842,79442035,79442240,79446654,	79440598,79440807,79441065,79441220,79441350,79441538,79441735,79441953,79442135,79442498,79447075,	0	ORF61	cmpl	cmpl	0,2,1,1,0,1,1,1,0,0,0,
chr10	79449825	79450259	MACS_peak_717	57.32	DOWNSTREAM	NM_175450	chr10	+	79422896	79431991	79422907	79430344	10	79422896,79423746,79427670,79427954,79428724,79428950,79429089,79429304,79430064,79430215,	79423117,79423857,79427804,79428096,79428868,79429015,79429214,79429471,79430133,79431991,	0	Wdr18	cmpl	cmpl	0,0,0,2,0,0,2,1,0,0,
chr10	79449825	79450259	MACS_peak_717	57.32	UPSTREAM	NM_013850	chr10	+	79460359	79478317	79460359	79478203	46	79460359,79460513,79460758,79460988,79461195,79461501,79462125,79462425,79463456,79463667,79464234,79464779,79465251,79465575,79465876,79466541,79467125,79467463,79467698,79468387,79468732,79468996,79469177,79469630,79469880,79470068,79470398,79470607,79470889,79471283,79471407,79471672,79472602,79472895,79473780,79474019,79474457,79474659,79474868,79476056,79476363,79476590,79476973,79477212,794…	79460425,79460607,79460900,79461101,79461269,79461582,79462336,79462565,79463573,79463835,79464464,79464956,79465474,79465797,79466078,79466652,79467297,79467595,79467838,79468525,79468920,79469054,79469455,79469667,79469973,79470196,79470523,79470706,79471177,79471316,79471585,79471842,79472780,79473011,79473925,79474143,79474587,79474780,79474931,79476163,79476505,79476725,79477077,79477305,794…	0	Abca7	cmpl	cmpl	0,0,1,2,1,0,0,1,0,0,0,2,2,0,0,1,1,2,2,1,1,0,1,0,1,1,0,2,2,2,2,0,2,0,2,0,1,2,0,0,2,0,0,2,2,0,
chr10	79449825	79450259	MACS_peak_717	57.32	DOWNSTREAM	NM_130455	chr10	+	79433468	79439935	79433644	79439849	9	79433468,79435588,79436425,79438378,79438605,79438798,79439138,79439379,79439536,	79434070,79436181,79437458,79438524,79438721,79438950,79439303,79439447,79439935,	0	Grin3b	cmpl	cmpl	0,0,2,0,2,1,0,0,2,
chr10	79449825	79450259	MACS_peak_717	57.32	TSS	NM_001003949	chr10	-	79439864	79447075	79440163	79446876	11	79439864,79440707,79440932,79441136,79441292,79441437,79441612,79441842,79442035,79442240,79446654,	79440598,79440807,79441065,79441220,79441350,79441538,79441735,79441953,79442135,79442498,79447075,	0	ORF61	cmpl	cmpl	0,2,1,1,0,1,1,1,0,0,0,
chr10	79452004	79452643	MACS_peak_718	61.13	DOWNSTREAM	NM_175450	chr10	+	79422896	79431991	79422907	79430344	10	79422896,79423746,79427670,79427954,79428724,79428950,79429089,79429304,79430064,79430215,	79423117,79423857,79427804,79428096,79428868,79429015,79429214,79429471,79430133,79431991,	0	Wdr18	cmpl	cmpl	0,0,0,2,0,0,2,1,0,0,
chr10	79452004	79452643	MACS_peak_718	61.13	UPSTREAM	NM_013850	chr10	+	79460359	79478317	79460359	79478203	46	79460359,79460513,79460758,79460988,79461195,79461501,79462125,79462425,79463456,79463667,79464234,79464779,79465251,79465575,79465876,79466541,79467125,79467463,79467698,79468387,79468732,79468996,79469177,79469630,79469880,79470068,79470398,79470607,79470889,79471283,79471407,79471672,79472602,79472895,79473780,79474019,79474457,79474659,79474868,79476056,79476363,79476590,79476973,79477212,794…	79460425,79460607,79460900,79461101,79461269,79461582,79462336,79462565,79463573,79463835,79464464,79464956,79465474,79465797,79466078,79466652,79467297,79467595,79467838,79468525,79468920,79469054,79469455,79469667,79469973,79470196,79470523,79470706,79471177,79471316,79471585,79471842,79472780,79473011,79473925,79474143,79474587,79474780,79474931,79476163,79476505,79476725,79477077,79477305,794…	0	Abca7	cmpl	cmpl	0,0,1,2,1,0,0,1,0,0,0,2,2,0,0,1,1,2,2,1,1,0,1,0,1,1,0,2,2,2,2,0,2,0,2,0,1,2,0,0,2,0,0,2,2,0,
chr10	79452004	79452643	MACS_peak_718	61.13	DOWNSTREAM	NM_130455	chr10	+	79433468	79439935	79433644	79439849	9	79433468,79435588,79436425,79438378,79438605,79438798,79439138,79439379,79439536,	79434070,79436181,79437458,79438524,79438721,79438950,79439303,79439447,79439935,	0	Grin3b	cmpl	cmpl	0,0,2,0,2,1,0,0,2,
chr10	79452004	79452643	MACS_peak_718	61.13	TSS	NM_001003949	chr10	-	79439864	79447075	79440163	79446876	11	79439864,79440707,79440932,79441136,79441292,79441437,79441612,79441842,79442035,79442240,79446654,	79440598,79440807,79441065,79441220,79441350,79441538,79441735,79441953,79442135,79442498,79447075,	0	ORF61	cmpl	cmpl	0,2,1,1,0,1,1,1,0,0,0,
chr10	79464472	79465386	MACS_peak_719	126.35	UPSTREAM	NM_001142701	chr10	+	79479416	79494216	79479570	79493793	23	79479416,79480524,79483434,79483695,79483866,79484133,79484290,79484539,79484821,79485019,79487407,79488153,79488900,79489177,79489401,79489567,79489777,79490283,79490565,79491401,79491717,79493033,79493476,	79479663,79480849,79483578,79483780,79483939,79484200,79484428,79484604,79484932,79485100,79487596,79488291,79489091,79489302,79489479,79489672,79489950,79490472,79490703,79491628,79491928,79493121,79494216,	0	Hmha1	cmpl	cmpl	0,0,1,1,2,0,1,1,0,0,0,0,0,2,1,1,1,0,0,0,2,0,1,
chr10	79464472	79465386	MACS_peak_719	126.35	INTRAGENIC	NM_013850	chr10	+	79460359	79478317	79460359	79478203	46	79460359,79460513,79460758,79460988,79461195,79461501,79462125,79462425,79463456,79463667,79464234,79464779,79465251,79465575,79465876,79466541,79467125,79467463,79467698,79468387,79468732,79468996,79469177,79469630,79469880,79470068,79470398,79470607,79470889,79471283,79471407,79471672,79472602,79472895,79473780,79474019,79474457,79474659,79474868,79476056,79476363,79476590,79476973,79477212,794…	79460425,79460607,79460900,79461101,79461269,79461582,79462336,79462565,79463573,79463835,79464464,79464956,79465474,79465797,79466078,79466652,79467297,79467595,79467838,79468525,79468920,79469054,79469455,79469667,79469973,79470196,79470523,79470706,79471177,79471316,79471585,79471842,79472780,79473011,79473925,79474143,79474587,79474780,79474931,79476163,79476505,79476725,79477077,79477305,794…	0	Abca7	cmpl	cmpl	0,0,1,2,1,0,0,1,0,0,0,2,2,0,0,1,1,2,2,1,1,0,1,0,1,1,0,2,2,2,2,0,2,0,2,0,1,2,0,0,2,0,0,2,2,0,
chr10	79464472	79465386	MACS_peak_719	126.35	DOWNSTREAM	NM_130455	chr10	+	79433468	79439935	79433644	79439849	9	79433468,79435588,79436425,79438378,79438605,79438798,79439138,79439379,79439536,	79434070,79436181,79437458,79438524,79438721,79438950,79439303,79439447,79439935,	0	Grin3b	cmpl	cmpl	0,0,2,0,2,1,0,0,2,
chr10	79464472	79465386	MACS_peak_719	126.35	UPSTREAM	NM_027521	chr10	+	79482419	79494216	79482473	79493793	22	79482419,79483434,79483695,79483866,79484133,79484290,79484539,79484821,79485019,79487407,79488153,79488900,79489177,79489401,79489567,79489777,79490283,79490565,79491401,79491717,79493033,79493476,	79482543,79483578,79483780,79483939,79484200,79484428,79484604,79484932,79485100,79487596,79488291,79489091,79489302,79489479,79489672,79489950,79490472,79490703,79491628,79491928,79493121,79494216,	0	Hmha1	cmpl	cmpl	0,1,1,2,0,1,1,0,0,0,0,0,2,1,1,1,0,0,0,2,0,1,
chr10	79464472	79465386	MACS_peak_719	126.35	DOWNSTREAM	NM_007725	chr10	+	79451344	79458145	79451422	79457359	7	79451344,79454104,79455017,79455187,79455958,79456172,79457095,	79451485,79454226,79455084,79455325,79456075,79456319,79458145,	0	Cnn2	cmpl	cmpl	0,0,2,0,0,0,0,
chr10	79526052	79526606	MACS_peak_720	61.19	DOWNSTREAM	NM_001037741	chr10	+	79516781	79519184	79516793	79518963	7	79516781,79517258,79517444,79517712,79518667,79518784,79518930,	79517045,79517353,79517589,79517864,79518692,79518844,79519184,	0	Gpx4	cmpl	cmpl	0,0,2,0,2,0,0,
chr10	79526052	79526606	MACS_peak_720	61.19	DOWNSTREAM	NM_008162	chr10	+	79516254	79519184	79516376	79518963	7	79516254,79517258,79517444,79517712,79518667,79518784,79518930,	79516460,79517353,79517589,79517864,79518692,79518844,79519184,	0	Gpx4	cmpl	cmpl	0,0,2,0,2,0,0,
chr10	79622197	79622935	MACS_peak_721	81.76	UPSTREAM	NM_027207	chr10	+	79635688	79637864	79635710	79637562	3	79635688,79636953,79637561,	79635919,79637070,79637864,	0	1600002K03Rik	cmpl	cmpl	0,2,2,
chr10	79622197	79622935	MACS_peak_721	81.76	UPSTREAM	NM_007705	chr10	+	79630585	79634398	79632558	79633743	7	79630585,79632552,79632760,79632946,79633169,79633438,79633726,	79630661,79632661,79632867,79633085,79633251,79633509,79634398,	0	Cirbp	cmpl	cmpl	-1,0,1,0,1,2,1,
chr10	79622197	79622935	MACS_peak_721	81.76	UPSTREAM	NM_007909	chr10	+	79642226	79652755	79642507	79651535	4	79642226,79649496,79651186,79651413,	79642635,79649810,79651252,79652755,	0	Efna2	cmpl	cmpl	0,2,1,1,
chr10	79622197	79622935	MACS_peak_721	81.76	DOWNSTREAM	NM_021565	chr10	+	79611034	79621112	79612822	79619387	9	79611034,79612426,79614122,79614405,79616335,79616560,79617075,79617878,79619109,	79611094,79613058,79614210,79614468,79616464,79616878,79617217,79618151,79621112,	0	Midn	cmpl	cmpl	-1,0,2,0,0,0,0,1,1,
chr10	79622197	79622935	MACS_peak_721	81.76	DOWNSTREAM	NM_025313	chr10	+	79605059	79608563	79605210	79608290	4	79605059,79606576,79607963,79608167,	79605351,79606730,79608052,79608563,	0	Atp5d	cmpl	cmpl	0,0,1,0,
chr10	79701334	79701796	MACS_peak_722	54.59	UPSTREAM	NM_029272	chr10	+	79712196	79719537	79712220	79719478	8	79712196,79715141,79715818,79716404,79717584,79717834,79718668,79719380,	79712236,79715178,79715902,79716528,79717764,79717881,79718757,79719537,	0	Ndufs7	cmpl	cmpl	0,1,2,2,0,0,2,1,
chr10	79701334	79701796	MACS_peak_722	54.59	INTRAGENIC	NM_023431	chr10	+	79689342	79707889	79691126	79706388	14	79689342,79691066,79691739,79692801,79694982,79696967,79698855,79701059,79701604,79702664,79703136,79703508,79704541,79706330,	79689449,79691183,79691825,79692872,79695792,79697072,79698926,79701136,79701665,79702740,79703187,79703945,79704630,79707889,	0	Mum1	cmpl	cmpl	-1,0,0,2,1,1,1,0,2,0,1,1,0,2,
chr10	79701334	79701796	MACS_peak_722	54.59	DOWNSTREAM	NM_010255	chr10	-	79720895	79723713	79721061	79723646	6	79720895,79721684,79721921,79722345,79722512,79723465,	79721202,79721795,79721989,79722409,79722658,79723713,	0	Gamt	cmpl	cmpl	0,0,1,0,1,0,
chr10	79727154	79727740	MACS_peak_723	51.3	TSS	NM_001122604	chr10	+	79727735	79751158	79727894	79750456	12	79727735,79736751,79737192,79737548,79740316,79740977,79743673,79745768,79746974,79747153,79747994,79750283,	79727923,79736792,79737359,79737614,79740427,79741026,79743756,79745922,79747004,79747294,79748171,79751158,	0	Dazap1	cmpl	cmpl	0,2,1,0,0,0,1,0,1,1,1,1,
chr10	79782589	79783154	MACS_peak_724	52.96	DOWNSTREAM	NM_001113548	chr10	-	79803460	79811191	79803899	79808389	14	79803460,79804333,79804487,79804803,79805051,79805653,79806343,79807577,79807787,79808066,79808257,79810026,79810301,79811100,	79804201,79804405,79804686,79804967,79805138,79805765,79806471,79807686,79807848,79808158,79808448,79810082,79810600,79811191,	0	Adamtsl5	cmpl	cmpl	1,1,0,1,1,0,1,0,2,0,0,-1,-1,-1,
chr10	79782589	79783154	MACS_peak_724	52.96	TSS	NM_025521	chr10	-	79780999	79783293	79782092	79783057	2	79780999,79782927,	79782292,79783293,	0	2310011J03Rik	cmpl	cmpl	1,0,
chr10	79807678	79808358	MACS_peak_725	103.51	UPSTREAM	NM_183152	chr10	+	79819203	79828234	79819307	79828026	15	79819203,79820728,79820986,79821519,79821986,79822154,79822899,79823184,79823430,79823866,79824148,79825753,79826760,79826967,79827834,	79819412,79820836,79821103,79821661,79822074,79822250,79823098,79823311,79823507,79823939,79824226,79825910,79826890,79827078,79828234,	0	Plk5	cmpl	cmpl	0,0,0,0,1,2,2,0,1,0,1,1,2,0,0,
chr10	79807678	79808358	MACS_peak_725	103.51	DOWNSTREAM	NM_001204931	chr10	+	79792889	79799186	79792975	79797862	5	79792889,79796247,79796433,79796710,79797854,	79793090,79796341,79796572,79796879,79799186,	0	Reep6	cmpl	cmpl	0,1,2,0,1,
chr10	79807678	79808358	MACS_peak_725	103.51	DOWNSTREAM	NM_139292	chr10	+	79792889	79799186	79792975	79797862	6	79792889,79796247,79796433,79796710,79797457,79797854,	79793090,79796341,79796572,79796879,79797538,79799186,	0	Reep6	cmpl	cmpl	0,1,2,0,1,1,
chr10	79861414	79862823	MACS_peak_726	161.73	DOWNSTREAM	NM_001164150	chr10	-	79871909	79896398	79872876	79893756	19	79871909,79873142,79875949,79877906,79878109,79878597,79879304,79879475,79879834,79880057,79880282,79881510,79882211,79882765,79883832,79884076,79890415,79893681,79896064,	79873019,79873369,79876082,79878033,79878268,79878671,79879383,79879534,79879970,79880215,79880385,79881563,79882344,79882833,79883911,79884150,79890488,79893813,79896398,	0	Tcf3	cmpl	cmpl	1,2,1,0,0,1,0,1,0,1,0,1,0,1,0,1,0,0,-1,
chr10	79861414	79862823	MACS_peak_726	161.73	TSS	NM_013595	chr10	-	79855285	79862224	79855844	79861976	7	79855285,79855839,79856637,79857310,79857808,79858180,79861866,	79855763,79856025,79856815,79857401,79857946,79858340,79862224,	0	Mbd3	cmpl	cmpl	-1,2,1,0,0,2,0,
chr10	79896219	79897020	MACS_peak_727	69.18	TSS	NM_001164150	chr10	-	79871909	79896398	79872876	79893756	19	79871909,79873142,79875949,79877906,79878109,79878597,79879304,79879475,79879834,79880057,79880282,79881510,79882211,79882765,79883832,79884076,79890415,79893681,79896064,	79873019,79873369,79876082,79878033,79878268,79878671,79879383,79879534,79879970,79880215,79880385,79881563,79882344,79882833,79883911,79884150,79890488,79893813,79896398,	0	Tcf3	cmpl	cmpl	1,2,1,0,0,1,0,1,0,1,0,1,0,1,0,1,0,0,-1,
chr10	80084689	80085468	MACS_peak_728	78.09	DOWNSTREAM	NM_001100606	chr10	+	80065624	80070399	80069074	80070124	2	80065624,80069058,	80065694,80070399,	0	Adat3	cmpl	cmpl	-1,0,
chr10	80084689	80085468	MACS_peak_728	78.09	UPSTREAM	NM_001159591	chr10	+	80092400	80103516	80097199	80102821	12	80092400,80096958,80100632,80100754,80100905,80101138,80101450,80101624,80101829,80102324,80102512,80102766,	80092475,80097386,80100673,80100824,80101054,80101373,80101536,80101709,80101978,80102408,80102619,80103516,	0	Csnk1g2	cmpl	cmpl	-1,0,1,0,1,0,1,0,1,0,0,2,
chr10	80084689	80085468	MACS_peak_728	78.09	TSS	NM_134002	chr10	+	80085524	80103516	80097199	80102821	11	80085524,80096958,80100632,80100754,80101138,80101450,80101624,80101829,80102324,80102512,80102766,	80085695,80097386,80100673,80101054,80101373,80101536,80101709,80101978,80102408,80102619,80103516,	0	Csnk1g2	cmpl	cmpl	-1,0,1,0,0,1,0,1,0,0,2,
chr10	80125852	80126782	MACS_peak_729	109.01	DOWNSTREAM	NM_001159591	chr10	+	80092400	80103516	80097199	80102821	12	80092400,80096958,80100632,80100754,80100905,80101138,80101450,80101624,80101829,80102324,80102512,80102766,	80092475,80097386,80100673,80100824,80101054,80101373,80101536,80101709,80101978,80102408,80102619,80103516,	0	Csnk1g2	cmpl	cmpl	-1,0,1,0,1,0,1,0,1,0,0,2,
chr10	80125852	80126782	MACS_peak_729	109.01	DOWNSTREAM	NM_134002	chr10	+	80085524	80103516	80097199	80102821	11	80085524,80096958,80100632,80100754,80101138,80101450,80101624,80101829,80102324,80102512,80102766,	80085695,80097386,80100673,80101054,80101373,80101536,80101709,80101978,80102408,80102619,80103516,	0	Csnk1g2	cmpl	cmpl	-1,0,1,0,0,1,0,1,0,0,2,
chr10	80125852	80126782	MACS_peak_729	109.01	DOWNSTREAM	NM_021462	chr10	-	80128073	80134721	80129851	80134580	12	80128073,80130357,80130710,80131266,80131689,80131899,80132042,80132374,80132640,80134303,80134480,80134672,	80130077,80130401,80130875,80131461,80131785,80131955,80132147,80132448,80132720,80134401,80134582,80134721,	0	Mknk2	cmpl	cmpl	2,0,0,0,0,1,1,2,0,1,0,-1,
chr10	80125852	80126782	MACS_peak_729	109.01	DOWNSTREAM	NM_172457	chr10	-	80147997	80164565	80149888	80154234	4	80147997,80152596,80153813,80164541,	80149918,80152799,80154312,80164565,	0	Mob3a	cmpl	cmpl	0,1,0,-1,
chr10	80138890	80139670	MACS_peak_730	63.93	TSS	NM_021462	chr10	-	80128073	80134721	80129851	80134580	12	80128073,80130357,80130710,80131266,80131689,80131899,80132042,80132374,80132640,80134303,80134480,80134672,	80130077,80130401,80130875,80131461,80131785,80131955,80132147,80132448,80132720,80134401,80134582,80134721,	0	Mknk2	cmpl	cmpl	2,0,0,0,0,1,1,2,0,1,0,-1,
chr10	80164344	80165035	MACS_peak_731	63.96	TSS	NM_172457	chr10	-	80147997	80164565	80149888	80154234	4	80147997,80152596,80153813,80164541,	80149918,80152799,80154312,80164565,	0	Mob3a	cmpl	cmpl	0,1,0,-1,
chr10	80260879	80261602	MACS_peak_732	83.16	DOWNSTREAM	NM_028001	chr10	-	80271240	80276243	80271316	80275157	7	80271240,80271890,80272920,80273208,80274811,80275039,80276207,	80271784,80271973,80273109,80273311,80274849,80275162,80276243,	0	Jsrp1	cmpl	cmpl	0,1,1,0,1,0,-1,
chr10	80260879	80261602	MACS_peak_732	83.16	DOWNSTREAM	NM_199322	chr10	+	80217950	80257092	80218188	80256259	28	80217950,80227346,80228907,80231349,80233882,80235848,80236450,80240300,80241007,80243587,80244112,80244887,80245928,80246168,80246617,80247309,80247486,80247794,80248242,80248526,80249098,80249748,80250578,80251259,80252058,80253064,80253355,80256251,	80218269,80227390,80228982,80231413,80234111,80235943,80236513,80240356,80241087,80243656,80244219,80244929,80246036,80246400,80246731,80247401,80247588,80247932,80248368,80249011,80249234,80249895,80250708,80251837,80252264,80253129,80254306,80257092,	0	Dot1l	cmpl	cmpl	0,0,2,2,0,1,0,0,2,1,1,0,0,0,1,1,0,0,0,0,2,0,0,1,0,2,1,1,
chr10	80260879	80261602	MACS_peak_732	83.16	UPSTREAM	NM_007445	chr10	+	80267992	80270393	80267992	80270393	5	80267992,80268768,80269088,80269284,80269543,	80268395,80268911,80269197,80269444,80270393,	0	Amh	cmpl	cmpl	0,1,0,1,2,
chr10	80260879	80261602	MACS_peak_732	83.16	TSS	NM_023900	chr10	-	80258843	80261371	80259156	80260919	6	80258843,80259335,80259476,80260517,80260654,80260825,	80259267,80259399,80259567,80260584,80260722,80261371,	0	Plekhj1	cmpl	cmpl	0,2,1,0,1,0,
chr10	80392573	80393200	MACS_peak_733	69.49	TSS	NM_008655	chr10	+	80392835	80394949	80393060	80394391	4	80392835,80393192,80393773,80394277,	80393104,80393294,80393996,80394949,	0	Gadd45b	cmpl	cmpl	0,2,2,0,
chr10	80462328	80462834	MACS_peak_734	50.67	TSS	NM_001038655	chr10	-	80411368	80464110	80414365	80415659	4	80411368,80415575,80460736,80463977,	80414491,80415691,80460789,80464110,	0	Gng7	cmpl	cmpl	0,0,-1,-1,
chr10	80568190	80569102	MACS_peak_735	134.7	DOWNSTREAM	NM_022653	chr10	+	80532827	80545105	80533007	80544764	13	80532827,80535897,80538255,80539687,80540657,80541214,80542202,80542615,80543157,80543771,80544051,80544344,80544608,	80533023,80536110,80538404,80539795,80540760,80541375,80542338,80542982,80543359,80543958,80544180,80544481,80545105,	0	Thop1	cmpl	cmpl	0,1,1,0,0,1,0,1,2,0,1,1,0,
chr10	80568190	80569102	MACS_peak_735	134.7	TSS	NM_023138	chr10	+	80568691	80587442	80568891	80586475	11	80568691,80571492,80577770,80580896,80581853,80582001,80582234,80583787,80584647,80585311,80586364,	80568983,80571703,80577917,80580974,80581905,80582126,80582448,80583855,80584709,80585357,80587442,	0	Map2k2	cmpl	cmpl	0,2,0,0,0,1,0,1,0,2,0,
chr10	80638795	80639727	MACS_peak_736	116.54	TSS	NM_007907	chr10	+	80639375	80645254	80639471	80644827	14	80639375,80640409,80640797,80641425,80641825,80642090,80642288,80642626,80642897,80643309,80643548,80643972,80644237,80644633,	80639474,80640624,80640979,80641637,80642004,80642196,80642541,80642822,80643156,80643417,80643902,80644155,80644370,80645254,	0	Eef2	cmpl	cmpl	0,0,2,1,0,2,0,1,2,0,0,0,0,1,
chr10	80729149	80729829	MACS_peak_737	51.12	TSS	NR_037218	chr10	+	80734341	80734432	80734432	80734432	1	80734341,	80734432,	0	Mir3057	unk	unk	-1,
chr10	80730126	80730649	MACS_peak_738	56.53	TSS	NR_037218	chr10	+	80734341	80734432	80734432	80734432	1	80734341,	80734432,	0	Mir3057	unk	unk	-1,
chr10	80746901	80747584	MACS_peak_739	111.51	DOWNSTREAM	NR_037218	chr10	+	80734341	80734432	80734432	80734432	1	80734341,	80734432,	0	Mir3057	unk	unk	-1,
chr10	80746901	80747584	MACS_peak_739	111.51	UPSTREAM	NM_008844	chr10	+	80755716	80782719	80755803	80780513	18	80755716,80767428,80767930,80768443,80769052,80770228,80771692,80773423,80774387,80774718,80775246,80775652,80776107,80776364,80776739,80777736,80780070,80780510,	80755897,80767460,80768023,80768574,80769170,80770381,80771992,80773629,80774471,80774767,80775331,80775814,80776246,80776397,80776838,80777863,80780148,80782719,	0	Pip5k1c	cmpl	cmpl	0,1,0,0,2,0,0,0,2,2,0,1,1,2,2,2,0,0,
chr10	80746901	80747584	MACS_peak_739	111.51	DOWNSTREAM	NM_010768	chr10	+	80720289	80725726	80720980	80725607	14	80720289,80720913,80721224,80721921,80722127,80722331,80722833,80723652,80724187,80724375,80724539,80724705,80725192,80725367,	80720319,80721049,80721284,80722032,80722243,80722551,80722927,80723718,80724287,80724460,80724613,80724901,80725279,80725726,	0	Matk	cmpl	cmpl	-1,0,0,0,0,2,0,1,1,2,0,2,0,0,
chr10	80746901	80747584	MACS_peak_739	111.51	TSS	NM_013769	chr10	-	80735944	80754012	80736031	80746475	21	80735944,80736393,80736547,80737127,80737324,80737918,80739012,80739940,80740563,80741368,80741939,80742249,80742638,80742827,80743150,80743510,80743849,80745682,80746240,80746427,80753792,	80736134,80736440,80736814,80737228,80737535,80737989,80739108,80740155,80740810,80741477,80742096,80742316,80742700,80742936,80743310,80743614,80744177,80745785,80746350,80746484,80754012,	0	Tjp3	cmpl	cmpl	2,0,0,1,0,1,1,2,1,0,2,1,2,1,0,1,0,2,0,0,-1,
chr10	80783424	80784101	MACS_peak_740	72.4	UPSTREAM	NM_009325	chr10	+	80791475	80797917	80795223	80797452	4	80791475,80792759,80795136,80797203,	80791662,80792913,80796000,80797917,	0	Tbxa2r	cmpl	cmpl	-1,-1,0,0,
chr10	80783424	80784101	MACS_peak_740	72.4	DOWNSTREAM	NM_001163165	chr10	-	80808790	80813171	80809209	80812916	10	80808790,80809304,80809585,80810180,80810730,80811240,80811630,80812124,80812878,80813017,	80809222,80809437,80809801,80810253,80810777,80811361,80811834,80812233,80812934,80813171,	0	Hmg20b	cmpl	cmpl	2,1,1,0,1,0,0,2,0,-1,
chr10	80783424	80784101	MACS_peak_740	72.4	TSS	NM_027381	chr10	+	80783847	80788996	80783955	80788699	9	80783847,80785182,80785865,80786363,80786654,80787047,80787613,80787834,80788208,	80784191,80785750,80786011,80786526,80786769,80787240,80787733,80788121,80788996,	0	2510012J08Rik	cmpl	cmpl	0,2,0,2,0,1,2,2,1,
chr10	80846771	80847339	MACS_peak_741	59.93	DOWNSTREAM	NM_008688	chr10	-	80858935	80889918	80866122	80889850	10	80858935,80866096,80867568,80868833,80870299,80870850,80871079,80872355,80883011,80889820,	80863816,80866173,80867753,80868959,80870424,80870974,80871154,80872427,80883543,80889918,	0	Nfic	cmpl	cmpl	-1,0,1,1,2,1,1,1,0,0,
chr10	80846771	80847339	MACS_peak_741	59.93	DOWNSTREAM	NM_028657	chr10	+	80820314	80826780	80820342	80826537	10	80820314,80822826,80823843,80824058,80824769,80824949,80825432,80825677,80826297,80826514,	80820631,80823037,80823982,80824244,80824862,80825042,80825603,80825772,80826428,80826780,	0	Mfsd12	cmpl	cmpl	0,1,2,0,0,0,0,0,2,1,
chr10	80846771	80847339	MACS_peak_741	59.93	DOWNSTREAM	NM_026756	chr10	-	80858935	80889918	80863798	80889850	9	80858935,80867568,80868833,80870299,80870850,80871079,80872355,80883011,80889820,	80863816,80867753,80868959,80870424,80870974,80871154,80872427,80883543,80889918,	0	Nfic	cmpl	cmpl	0,1,1,2,1,1,1,0,0,
chr10	80846771	80847339	MACS_peak_741	59.93	TSS	NM_133964	chr10	+	80847172	80851097	80848518	80850768	5	80847172,80848463,80849157,80849984,80850451,	80847323,80848792,80849234,80850225,80851097,	0	Dohh	cmpl	cmpl	-1,0,1,0,1,
chr10	80893653	80894256	MACS_peak_742	56.96	TSS	NM_008688	chr10	-	80858935	80889918	80866122	80889850	10	80858935,80866096,80867568,80868833,80870299,80870850,80871079,80872355,80883011,80889820,	80863816,80866173,80867753,80868959,80870424,80870974,80871154,80872427,80883543,80889918,	0	Nfic	cmpl	cmpl	-1,0,1,1,2,1,1,1,0,0,
chr10	80912673	80913325	MACS_peak_743	53.14	DOWNSTREAM	NM_176954	chr10	-	80921972	80945454	80925070	80945350	12	80921972,80925413,80927084,80928711,80929669,80929900,80930729,80932188,80933373,80934050,80939613,80945205,	80925086,80925516,80927165,80928774,80929816,80930042,80930876,80932268,80933502,80934102,80939696,80945454,	0	Celf5	cmpl	cmpl	2,1,1,1,1,0,0,1,1,0,1,0,
chr10	81033191	81034247	MACS_peak_744	420.44	TSS	NM_019725	chr10	+	81038031	81053590	81038412	81053077	21	81038031,81038549,81038980,81039273,81040373,81043001,81043228,81043639,81044389,81045157,81045481,81047347,81048957,81049599,81049836,81050297,81050618,81051553,81052164,81052969,81053301,	81038436,81038647,81039044,81039387,81040436,81043076,81043412,81043659,81044500,81045202,81045631,81047486,81049118,81049673,81050086,81050545,81050766,81051704,81052241,81053097,81053590,	0	Tle2	cmpl	cmpl	0,0,2,0,0,0,0,1,0,0,0,0,1,0,2,0,2,0,1,0,-1,
chr10	81105900	81106796	MACS_peak_745	104.66	INTRAGENIC	NM_027480	chr10	+	81091284	81110357	81092457	81109922	20	81091284,81092293,81097609,81097814,81098432,81099113,81100813,81101015,81101305,81102051,81102600,81102772,81103512,81103636,81104720,81105045,81105261,81109049,81109537,81109844,	81091385,81092493,81097740,81097903,81098497,81099171,81100884,81101122,81101493,81102089,81102681,81102880,81103557,81103735,81104793,81105164,81106638,81109178,81109603,81110357,	0	Ankrd24	cmpl	cmpl	-1,0,0,2,1,0,1,0,2,1,0,0,0,0,0,1,0,0,0,0,
chr10	82306429	82307338	MACS_peak_746	293.26	UPSTREAM	NM_001042513	chr10	+	82321950	82360469	82337393	82358790	15	82321950,82323268,82337357,82338368,82340010,82341950,82342494,82344467,82346658,82347229,82347686,82347930,82349917,82353128,82358721,	82322045,82323375,82337480,82338441,82340130,82342093,82342610,82344693,82346751,82347306,82347843,82348038,82350013,82353263,82360469,	0	Txnrd1	cmpl	cmpl	-1,-1,0,0,1,1,0,2,0,0,2,0,0,0,0,
chr10	82306429	82307338	MACS_peak_746	293.26	UPSTREAM	NM_001042514	chr10	+	82323085	82360469	82337393	82358790	14	82323085,82337357,82338368,82340010,82341950,82342494,82344467,82346658,82347229,82347686,82347930,82349917,82353128,82358721,	82323375,82337480,82338441,82340130,82342093,82342610,82344693,82346751,82347306,82347843,82348038,82350013,82353263,82360469,	0	Txnrd1	cmpl	cmpl	-1,0,0,1,1,0,2,0,0,2,0,0,0,0,
chr10	82306429	82307338	MACS_peak_746	293.26	DOWNSTREAM	NR_038042	chr10	+	82274867	82286987	82286987	82286987	3	82274867,82281775,82286261,	82275104,82281868,82286987,	0	1700028I16Rik	unk	unk	-1,-1,-1,
chr10	82306429	82307338	MACS_peak_746	293.26	UPSTREAM	NM_015762	chr10	+	82321950	82360469	82337393	82358790	14	82321950,82337357,82338368,82340010,82341950,82342494,82344467,82346658,82347229,82347686,82347930,82349917,82353128,82358721,	82322045,82337480,82338441,82340130,82342093,82342610,82344693,82346751,82347306,82347843,82348038,82350013,82353263,82360469,	0	Txnrd1	cmpl	cmpl	-1,0,0,1,1,0,2,0,0,2,0,0,0,0,
chr10	82306429	82307338	MACS_peak_746	293.26	UPSTREAM	NM_025499	chr10	+	82329370	82330674	82329451	82330579	1	82329370,	82330674,	0	Eid3	cmpl	cmpl	0,
chr10	82306429	82307338	MACS_peak_746	293.26	TSS	NM_001042523	chr10	+	82296695	82360469	82335714	82358790	15	82296695,82335682,82337357,82338368,82340010,82341950,82342494,82344467,82346658,82347229,82347686,82347930,82349917,82353128,82358721,	82296776,82336020,82337480,82338441,82340130,82342093,82342610,82344693,82346751,82347306,82347843,82348038,82350013,82353263,82360469,	0	Txnrd1	cmpl	cmpl	-1,0,0,0,1,1,0,2,0,0,2,0,0,0,0,
chr10	82482165	82482676	MACS_peak_747	50.26	TSS	NM_021439	chr10	+	82448241	82658636	82448609	82654544	3	82448241,82554813,82653689,	82448727,82554899,82658636,	0	Chst11	cmpl	cmpl	0,1,0,
chr10	82516700	82517454	MACS_peak_748	154.7	TSS	NM_021439	chr10	+	82448241	82658636	82448609	82654544	3	82448241,82554813,82653689,	82448727,82554899,82658636,	0	Chst11	cmpl	cmpl	0,1,0,
chr10	82519009	82519523	MACS_peak_749	50.01	TSS	NM_021439	chr10	+	82448241	82658636	82448609	82654544	3	82448241,82554813,82653689,	82448727,82554899,82658636,	0	Chst11	cmpl	cmpl	0,1,0,
chr10	82756219	82756945	MACS_peak_750	68.19	NONE
chr10	82816554	82817058	MACS_peak_751	58.26	UPSTREAM	NM_026579	chr10	+	82822965	82831580	82823003	82828667	4	82822965,82824791,82827123,82828448,	82823118,82824878,82827260,82831580,	0	D10Wsu102e	cmpl	cmpl	0,1,1,0,
chr10	83186255	83186838	MACS_peak_752	66.03	TSS	NM_001145198	chr10	+	83185609	83225507	83185733	83222342	6	83185609,83200653,83220189,83220878,83222337,83224662,	83185779,83200678,83220225,83220958,83222375,83225507,	0	1500009L16Rik	cmpl	cmpl	0,1,2,2,1,-1,
chr10	83466163	83466815	MACS_peak_753	67.25	NONE
chr10	84152532	84153200	MACS_peak_754	65.87	INTRAGENIC	NM_027423	chr10	+	84085181	84189923	84085211	84188525	28	84085181,84090994,84091227,84091371,84094529,84095199,84097645,84100799,84102486,84109540,84115418,84118689,84130066,84136072,84137301,84139627,84142490,84143110,84146921,84155541,84158299,84159693,84162143,84176373,84176989,84181154,84183088,84188395,	84085283,84091027,84091284,84091436,84094605,84095300,84097737,84100917,84102595,84109663,84115538,84118824,84130228,84136273,84137464,84139781,84142565,84143209,84147049,84155751,84158458,84159811,84162286,84176477,84177156,84181268,84183262,84189923,	0	Polr3b	cmpl	cmpl	0,0,0,0,2,0,2,1,2,0,0,0,0,0,0,1,2,2,2,1,1,1,2,1,0,2,2,2,
chr10	84829770	84830316	MACS_peak_755	77.55	UPSTREAM	NM_028709	chr10	+	84849558	85123037	84850073	85121094	17	84849558,85009186,85024249,85061469,85087647,85089941,85091956,85093832,85094037,85094833,85096428,85103247,85108232,85110456,85114351,85117222,85120884,	84851223,85009336,85024454,85061622,85087813,85090031,85092058,85093926,85094173,85095054,85096607,85103353,85108335,85110538,85114420,85117336,85123037,	0	Btbd11	cmpl	cmpl	0,1,1,2,2,0,0,0,1,2,1,0,1,2,0,0,0,
chr10	84921677	84922182	MACS_peak_756	156.73	TSS	NM_028709	chr10	+	84849558	85123037	84850073	85121094	17	84849558,85009186,85024249,85061469,85087647,85089941,85091956,85093832,85094037,85094833,85096428,85103247,85108232,85110456,85114351,85117222,85120884,	84851223,85009336,85024454,85061622,85087813,85090031,85092058,85093926,85094173,85095054,85096607,85103353,85108335,85110538,85114420,85117336,85123037,	0	Btbd11	cmpl	cmpl	0,1,1,2,2,0,0,0,1,2,1,0,1,2,0,0,0,
chr10	85040739	85041425	MACS_peak_757	102.82	INTRAGENIC	NM_028709	chr10	+	84849558	85123037	84850073	85121094	17	84849558,85009186,85024249,85061469,85087647,85089941,85091956,85093832,85094037,85094833,85096428,85103247,85108232,85110456,85114351,85117222,85120884,	84851223,85009336,85024454,85061622,85087813,85090031,85092058,85093926,85094173,85095054,85096607,85103353,85108335,85110538,85114420,85117336,85123037,	0	Btbd11	cmpl	cmpl	0,1,1,2,2,0,0,0,1,2,1,0,1,2,0,0,0,
chr10	85040739	85041425	MACS_peak_757	102.82	UPSTREAM	NM_001017525	chr10	+	85061155	85123037	85061224	85121094	15	85061155,85061469,85087647,85089941,85091956,85093832,85094037,85094833,85096428,85103247,85108232,85110456,85114351,85117222,85120884,	85061322,85061622,85087813,85090031,85092058,85093926,85094173,85095054,85096607,85103353,85108335,85110538,85114420,85117336,85123037,	0	Btbd11	cmpl	cmpl	0,2,2,0,0,0,1,2,1,0,1,2,0,0,0,
chr10	85083808	85084207	MACS_peak_758	78.19	INTRAGENIC	NM_028709	chr10	+	84849558	85123037	84850073	85121094	17	84849558,85009186,85024249,85061469,85087647,85089941,85091956,85093832,85094037,85094833,85096428,85103247,85108232,85110456,85114351,85117222,85120884,	84851223,85009336,85024454,85061622,85087813,85090031,85092058,85093926,85094173,85095054,85096607,85103353,85108335,85110538,85114420,85117336,85123037,	0	Btbd11	cmpl	cmpl	0,1,1,2,2,0,0,0,1,2,1,0,1,2,0,0,0,
chr10	85083808	85084207	MACS_peak_758	78.19	INTRAGENIC	NM_001017525	chr10	+	85061155	85123037	85061224	85121094	15	85061155,85061469,85087647,85089941,85091956,85093832,85094037,85094833,85096428,85103247,85108232,85110456,85114351,85117222,85120884,	85061322,85061622,85087813,85090031,85092058,85093926,85094173,85095054,85096607,85103353,85108335,85110538,85114420,85117336,85123037,	0	Btbd11	cmpl	cmpl	0,2,2,0,0,0,1,2,1,0,1,2,0,0,0,
chr10	85379747	85380308	MACS_peak_759	75.95	UPSTREAM	NM_001163614	chr10	+	85391235	85392392	85391235	85391670	1	85391235,	85392392,	0	Ascl4	cmpl	cmpl	0,
chr10	85379747	85380308	MACS_peak_759	75.95	DOWNSTREAM	NM_145422	chr10	-	85401381	85420538	85401756	85420452	12	85401381,85404643,85405232,85405953,85406559,85408935,85409921,85412210,85414099,85416181,85418463,85420359,	85401864,85404763,85405343,85406142,85406735,85409095,85410078,85412367,85414199,85416249,85418542,85420538,	0	D10Wsu52e	cmpl	cmpl	0,0,0,0,1,0,2,1,0,1,0,0,
chr10	85379747	85380308	MACS_peak_759	75.95	TSS	NM_181650	chr10	-	85354712	85379690	85355874	85375715	12	85354712,85361919,85363586,85364448,85365671,85366875,85368093,85370020,85372967,85375582,85379268,85379552,	85356184,85362088,85363901,85364576,85365757,85367015,85368243,85370815,85373153,85375716,85379474,85379690,	0	Prdm4	cmpl	cmpl	2,1,1,2,0,1,1,1,1,0,-1,-1,
chr10	85783750	85784629	MACS_peak_760	164.29	TSS	NM_011595	chr10	+	85763156	85812250	85763598	85808647	5	85763156,85801117,85806677,85807298,85808449,	85763719,85801200,85806789,85807420,85812250,	0	Timp3	cmpl	cmpl	0,1,0,1,0,
chr10	85805366	85805860	MACS_peak_761	59.2	INTRAGENIC	NM_011595	chr10	+	85763156	85812250	85763598	85808647	5	85763156,85801117,85806677,85807298,85808449,	85763719,85801200,85806789,85807420,85812250,	0	Timp3	cmpl	cmpl	0,1,0,1,0,
chr10	86168330	86169370	MACS_peak_762	152.98	UPSTREAM	NM_153595	chr10	+	86175509	86194396	86175688	86194019	5	86175509,86182222,86186942,86192526,86193575,	86176484,86182409,86187157,86192687,86194396,	0	BC030307	cmpl	cmpl	0,1,2,1,0,
chr10	86168330	86169370	MACS_peak_762	152.98	TSS	NM_011631	chr10	-	86153585	86168189	86153846	86168100	18	86153585,86154373,86154884,86155130,86156121,86156658,86157094,86158221,86158404,86158570,86159463,86161063,86161328,86164441,86165653,86166204,86167038,86168051,	86153873,86154493,86155040,86155209,86156258,86156904,86157364,86158287,86158482,86158708,86159580,86161183,86161440,86164773,86165770,86166346,86167141,86168189,	0	Hsp90b1	cmpl	cmpl	0,0,0,2,0,0,0,0,0,0,0,0,2,0,0,2,1,0,
chr10	86478494	86479338	MACS_peak_763	59.34	NONE
chr10	87320915	87321395	MACS_peak_764	52.94	TSS	NM_184052	chr10	+	87323855	87378515	87324115	87378186	4	87323855,87327475,87376363,87378042,	87324130,87327632,87376545,87378515,	0	Igf1	cmpl	cmpl	0,0,1,0,
chr10	87814067	87814718	MACS_peak_765	53.22	TSS	NM_027878	chr10	-	87785548	87819820	87787485	87819667	7	87785548,87788078,87791827,87799555,87803264,87807388,87819536,	87787530,87788171,87791886,87799733,87803407,87807456,87819820,	0	Dram1	cmpl	cmpl	0,0,1,0,1,2,0,
chr10	88348327	88348697	MACS_peak_766	62.3	TSS	NM_145423	chr10	+	88348736	88392260	88349051	88389080	15	88348736,88354768,88357062,88364134,88365158,88367661,88369021,88370711,88372328,88374096,88381116,88382097,88384420,88388450,88388954,	88349402,88354834,88357114,88364202,88365313,88367802,88369151,88370800,88372441,88374164,88381203,88382303,88384524,88388530,88392260,	0	Slc5a8	cmpl	cmpl	0,0,0,1,0,2,2,0,2,1,0,0,2,1,0,
chr10	88433551	88434252	MACS_peak_767	144.14	NONE
chr10	88573497	88574043	MACS_peak_768	77.55	NONE
chr10	89177705	89178168	MACS_peak_769	62.27	NONE
chr10	89335087	89335653	MACS_peak_770	60.11	TSS	NM_001128086	chr10	+	89336253	90435729	89336416	90432659	25	89336253,89495958,89505290,89512560,89532212,89533812,89536723,89539720,89625905,89723397,89770313,89821779,89973340,89975559,90039833,90107202,90143511,90357843,90359991,90384040,90386275,90404166,90411279,90428969,90432548,	89336550,89496039,89505447,89512857,89532288,89533914,89536837,89539887,89626049,89723563,89770450,89821960,89973927,89975620,90039940,90107301,90143664,90357951,90360171,90384169,90386348,90404257,90411417,90429137,90435729,	0	Anks1b	cmpl	cmpl	0,2,2,0,0,1,1,1,0,0,1,0,1,0,1,0,0,0,0,0,0,2,0,0,0,
chr10	90545047	90545961	MACS_peak_771	74.21	TSS	NM_001042558	chr10	-	90452055	90545488	90454194	90542769	27	90452055,90458392,90459956,90462396,90463754,90471868,90476804,90481710,90483400,90486464,90494293,90499654,90502529,90510830,90512102,90517124,90518659,90521055,90522317,90522792,90524442,90524848,90529825,90540278,90542191,90542631,90544927,	90454341,90458539,90460082,90462522,90463874,90471994,90476921,90481830,90483526,90486593,90494455,90499780,90502661,90510956,90512229,90517309,90518773,90521187,90522485,90523031,90524574,90524961,90530009,90540476,90542381,90542876,90545488,	0	Apaf1	cmpl	cmpl	0,0,0,0,0,0,0,0,0,0,0,0,0,0,2,0,0,0,0,1,1,2,1,1,0,0,-1,
chr10	90586617	90587435	MACS_peak_772	89.35	DOWNSTREAM	NM_001080132	chr10	-	90610315	90634327	90612220	90634058	6	90610315,90614453,90621492,90626787,90628687,90633782,	90612503,90614542,90621590,90626946,90628814,90634327,	0	Tmpo	cmpl	cmpl	2,0,1,1,0,0,
chr10	90586617	90587435	MACS_peak_772	89.35	DOWNSTREAM	NM_027078	chr10	+	90545783	90565358	90545871	90565249	3	90545783,90555883,90564499,	90546041,90556001,90565358,	0	Ikbip	cmpl	cmpl	0,2,0,
chr10	90586617	90587435	MACS_peak_772	89.35	DOWNSTREAM	NM_001080131	chr10	-	90610315	90634327	90612220	90634058	7	90610315,90614453,90615372,90621492,90626787,90628687,90633782,	90612503,90614542,90615483,90621590,90626946,90628814,90634327,	0	Tmpo	cmpl	cmpl	2,0,0,1,1,0,0,
chr10	90586617	90587435	MACS_peak_772	89.35	DOWNSTREAM	NM_001080129	chr10	-	90610315	90634327	90612220	90634058	9	90610315,90614453,90615372,90615829,90616022,90621492,90626787,90628687,90633782,	90612503,90614542,90615483,90615925,90616142,90621590,90626946,90628814,90634327,	0	Tmpo	cmpl	cmpl	2,0,0,0,0,1,1,0,0,
chr10	90586617	90587435	MACS_peak_772	89.35	TSS	NM_133668	chr10	-	90579322	90586708	90579708	90586447	8	90579322,90579957,90580788,90581443,90582271,90584666,90586302,90586660,	90579869,90580068,90580961,90581625,90582451,90584788,90586451,90586708,	0	Slc25a3	cmpl	cmpl	1,1,2,0,0,1,0,-1,
chr10	90644155	90644843	MACS_peak_773	71.43	NONE
chr10	90697048	90697935	MACS_peak_774	190.1	NONE
chr10	91746883	91747423	MACS_peak_775	55.04	NONE
chr10	91984919	91985418	MACS_peak_776	51.27	NONE
chr10	93604066	93604596	MACS_peak_777	123.3	UPSTREAM	NM_011629	chr10	+	93610675	93659959	93619670	93658096	14	93610675,93619651,93624994,93626473,93628162,93630154,93630382,93633793,93634722,93644238,93650893,93653363,93655579,93657921,	93610847,93619724,93625189,93626552,93628342,93630302,93630473,93633978,93634882,93644360,93651033,93653501,93655685,93659959,	0	Nr2c1	cmpl	cmpl	-1,0,0,0,1,1,2,0,2,0,2,1,1,2,
chr10	93604066	93604596	MACS_peak_777	123.3	INTRAGENIC	NM_053072	chr10	+	93498745	93608084	93499039	93604534	21	93498745,93506046,93536927,93552321,93552476,93563146,93565986,93568729,93583197,93585983,93586288,93587634,93588293,93590113,93596024,93596745,93597761,93600180,93601028,93602483,93604497,	93499055,93508378,93537075,93552389,93552507,93563298,93566143,93568817,93583248,93586042,93586360,93587703,93588377,93590193,93596127,93596889,93597864,93600308,93601157,93602632,93608084,	0	Fgd6	cmpl	cmpl	0,1,2,0,2,0,2,0,1,1,0,0,0,0,2,0,0,1,0,0,2,
chr10	93642176	93642937	MACS_peak_778	220.08	INTRAGENIC	NM_011629	chr10	+	93610675	93659959	93619670	93658096	14	93610675,93619651,93624994,93626473,93628162,93630154,93630382,93633793,93634722,93644238,93650893,93653363,93655579,93657921,	93610847,93619724,93625189,93626552,93628342,93630302,93630473,93633978,93634882,93644360,93651033,93653501,93655685,93659959,	0	Nr2c1	cmpl	cmpl	-1,0,0,0,1,1,2,0,2,0,2,1,1,2,
chr10	93642176	93642937	MACS_peak_778	220.08	UPSTREAM	NM_025551	chr10	+	93661753	93683693	93661777	93683606	4	93661753,93662694,93666032,93683425,	93661875,93662777,93666120,93683693,	0	Ndufa12	cmpl	cmpl	0,2,1,2,
chr10	93986024	93986497	MACS_peak_779	77.55	TSS	NM_172051	chr10	+	93977601	94053699	93977771	94049775	4	93977601,94041167,94045018,94049472,	93977849,94042084,94045154,94053699,	0	Tmcc3	cmpl	cmpl	0,0,2,0,
chr10	94040625	94041135	MACS_peak_780	50.34	TSS	NM_177026	chr10	+	94039007	94053699	94041182	94049775	4	94039007,94041167,94045018,94049472,	94039197,94042084,94045154,94053699,	0	Tmcc3	cmpl	cmpl	-1,0,2,0,
chr10	94183076	94183560	MACS_peak_781	236.75	INTRAGENIC	NM_029852	chr10	+	94151534	94253081	94181718	94252553	16	94151534,94181596,94182336,94188391,94191335,94200517,94202801,94211685,94213003,94213254,94229186,94231563,94233689,94249488,94251391,94252448,	94151791,94181864,94182487,94188484,94191467,94200769,94202933,94211800,94213148,94213404,94229262,94231721,94233819,94249592,94251581,94253081,	0	Ccdc41	cmpl	cmpl	-1,0,2,0,0,0,0,0,1,2,2,0,2,0,2,0,
chr10	94277327	94277756	MACS_peak_782	57.83	DOWNSTREAM	NM_029852	chr10	+	94151534	94253081	94181718	94252553	16	94151534,94181596,94182336,94188391,94191335,94200517,94202801,94211685,94213003,94213254,94229186,94231563,94233689,94249488,94251391,94252448,	94151791,94181864,94182487,94188484,94191467,94200769,94202933,94211800,94213148,94213404,94229262,94231721,94233819,94249592,94251581,94253081,	0	Ccdc41	cmpl	cmpl	-1,0,2,0,0,0,0,0,1,2,2,0,2,0,2,0,
chr10	94305815	94306684	MACS_peak_783	139.72	NONE
chr10	94330927	94331742	MACS_peak_784	54.87	NONE
chr10	94570473	94571254	MACS_peak_785	133.51	NONE
chr10	94989280	94990024	MACS_peak_786	53.22	DOWNSTREAM	NM_027722	chr10	-	95009640	95026801	95011921	95026391	5	95009640,95012409,95014082,95015119,95026295,	95012124,95012494,95014127,95015230,95026801,	0	Nudt4	cmpl	cmpl	1,0,0,0,0,
chr10	94989280	94990024	MACS_peak_786	53.22	TSS	NM_080560	chr10	+	94977795	95008292	94977841	95004946	4	94977795,95003838,95004271,95004905,	94977871,95004085,95004412,95008292,	0	Ube2n	cmpl	cmpl	0,0,1,1,
chr10	95062856	95063831	MACS_peak_787	119.98	NONE
chr10	95143362	95143963	MACS_peak_788	50.15	NONE
chr10	95197489	95198145	MACS_peak_789	52.85	NONE
chr10	95771138	95771736	MACS_peak_790	57.37	NONE
chr10	95986463	95986982	MACS_peak_791	56.89	NONE
chr10	96049700	96050274	MACS_peak_792	66.87	NONE
chr10	96184951	96185713	MACS_peak_793	190.67	NONE
chr10	96205935	96206508	MACS_peak_794	59.5	NONE
chr10	97086533	97087362	MACS_peak_795	127.73	UPSTREAM	NM_007884	chr10	+	97106701	97144534	97112333	97143904	8	97106701,97110006,97112321,97133131,97137310,97138279,97139621,97143733,	97106723,97110096,97112498,97133306,97137469,97138482,97139717,97144534,	0	Epyc	cmpl	cmpl	-1,-1,0,0,1,1,0,0,
chr10	97086533	97087362	MACS_peak_795	127.73	DOWNSTREAM	NM_008438	chr10	+	97069838	97076322	97071414	97075609	3	97069838,97071406,97075442,	97070011,97072303,97076322,	0	Kera	cmpl	cmpl	-1,0,1,
chr10	98343410	98344028	MACS_peak_796	62.9	NONE
chr10	98569900	98570385	MACS_peak_797	52.49	TSS	NM_015737	chr10	+	98570768	98575881	98571048	98572785	1	98570768,	98575881,	0	Galnt4	cmpl	cmpl	0,
chr10	98590500	98591082	MACS_peak_798	115.78	DOWNSTREAM	NM_015737	chr10	+	98570768	98575881	98571048	98572785	1	98570768,	98575881,	0	Galnt4	cmpl	cmpl	0,
chr10	98590500	98591082	MACS_peak_798	115.78	INTRAGENIC	NM_027740	chr10	+	98569804	98660622	98569842	98659364	12	98569804,98570425,98587464,98592116,98606868,98607112,98615434,98617702,98618835,98627502,98655415,98659259,	98569857,98570510,98587636,98592296,98606976,98607228,98615568,98617771,98618985,98627583,98655631,98660622,	0	Poc1b	cmpl	cmpl	0,0,1,2,2,2,1,0,0,0,0,0,
chr10	98903507	98904055	MACS_peak_799	54.36	NONE
chr10	99947586	99948301	MACS_peak_800	116.1	TSS	NM_146009	chr10	+	99950922	100036289	99950940	100035741	53	99950922,99951195,99951953,99952780,99955281,99957534,99958274,99958456,99959322,99960573,99961695,99962780,99963736,99971297,99973120,99973295,99974920,99976553,99977091,99977767,99978787,99980410,99981087,99981278,99985863,99991182,99992651,99993734,99999439,100000069,100001559,100002617,100002969,100004183,100005050,100005875,100007550,100009008,100011361,100011886,100013997,100014450,10001704…	99951042,99951273,99952023,99952827,99955425,99957588,99958295,99958609,99959505,99960663,99961818,99962904,99963909,99971460,99973221,99973383,99975033,99976638,99977234,99977932,99978937,99980526,99981190,99981509,99986037,99991294,99992857,99993886,99999551,100000525,100001724,100002725,100003104,100004450,100005158,100006075,100007764,100009146,100011583,100012009,100014143,100014606,10001716…	0	Cep290	cmpl	cmpl	0,0,0,1,0,0,0,0,0,0,0,0,1,0,1,0,1,0,1,0,0,0,2,0,0,0,1,0,2,0,0,0,0,0,0,0,2,0,0,0,0,2,2,0,0,0,0,0,2,0,2,1,0,
chr10	99949824	99950550	MACS_peak_801	54.47	TSS	NM_146009	chr10	+	99950922	100036289	99950940	100035741	53	99950922,99951195,99951953,99952780,99955281,99957534,99958274,99958456,99959322,99960573,99961695,99962780,99963736,99971297,99973120,99973295,99974920,99976553,99977091,99977767,99978787,99980410,99981087,99981278,99985863,99991182,99992651,99993734,99999439,100000069,100001559,100002617,100002969,100004183,100005050,100005875,100007550,100009008,100011361,100011886,100013997,100014450,10001704…	99951042,99951273,99952023,99952827,99955425,99957588,99958295,99958609,99959505,99960663,99961818,99962904,99963909,99971460,99973221,99973383,99975033,99976638,99977234,99977932,99978937,99980526,99981190,99981509,99986037,99991294,99992857,99993886,99999551,100000525,100001724,100002725,100003104,100004450,100005158,100006075,100007764,100009146,100011583,100012009,100014143,100014606,10001716…	0	Cep290	cmpl	cmpl	0,0,0,1,0,0,0,0,0,0,0,0,1,0,1,0,1,0,1,0,0,0,2,0,0,0,1,0,2,0,0,0,0,0,0,0,2,0,0,0,0,2,2,0,0,0,0,0,2,0,2,1,0,
chr10	100370184	100370682	MACS_peak_802	51.35	NONE
chr10	101074010	101074578	MACS_peak_803	52.72	NONE
chr10	101097853	101098469	MACS_peak_804	129.04	NONE
chr10	101382018	101382753	MACS_peak_805	60.52	INTRAGENIC	NM_001205098	chr10	+	101144120	101854102	101840791	101851997	8	101144120,101326625,101474366,101813568,101832966,101840785,101847639,101850855,	101144584,101326664,101474478,101813618,101833027,101840938,101847787,101854102,	0	Mgat4c	cmpl	cmpl	-1,-1,-1,-1,-1,0,0,1,
chr10	102010855	102011454	MACS_peak_806	96.27	DOWNSTREAM	NM_146240	chr10	+	101974855	102009194	101975171	102008700	2	101974855,102007439,	101975218,102009194,	0	Rassf9	cmpl	cmpl	0,2,
chr10	102058379	102059065	MACS_peak_807	213.83	NONE
chr10	102121970	102122759	MACS_peak_808	77.23	NONE
chr10	102308532	102309013	MACS_peak_809	52.85	NONE
chr10	102441836	102442417	MACS_peak_810	66.22	NONE
chr10	104727517	104728221	MACS_peak_811	56.05	NONE
chr10	105012044	105012626	MACS_peak_812	51.61	TSS	NR_038032	chr10	+	105011606	105020926	105020926	105020926	3	105011606,105017458,105019044,	105012743,105017643,105020926,	0	Gm15663	unk	unk	-1,-1,-1,
chr10	105278126	105278804	MACS_peak_813	72.31	TSS	NM_207522	chr10	-	105200240	105278436	105200415	105278375	12	105200240,105202275,105203019,105216643,105230395,105231417,105234280,105260215,105263053,105266903,105269906,105278131,	105200517,105202347,105203094,105216737,105230469,105231447,105234375,105260366,105263647,105267010,105270071,105278436,	0	BC067068	cmpl	cmpl	0,0,0,2,0,0,1,0,0,1,1,0,
chr10	105570581	105571168	MACS_peak_814	58.29	NONE
chr10	106033219	106033958	MACS_peak_815	194.47	INTRAGENIC	NM_177373	chr10	+	105907365	106370524	105911689	106366168	32	105907365,105911687,105994301,106180542,106199038,106204529,106237792,106256391,106265944,106267621,106272751,106273107,106274336,106279741,106291992,106294464,106295216,106296832,106300309,106302305,106306934,106330487,106333373,106340698,106341872,106343421,106344768,106350620,106352736,106364758,106366109,106368178,	105907647,105911938,105994355,106180644,106199203,106204604,106237909,106256613,106266091,106267756,106272835,106273239,106274399,106279833,106292128,106294685,106295454,106296862,106300440,106302457,106307028,106330569,106333574,106340761,106341902,106343615,106344866,106350796,106352805,106364918,106366201,106370524,	0	Ppfia2	cmpl	cmpl	-1,0,0,0,0,0,0,0,0,0,0,0,0,0,2,0,2,0,0,2,1,2,0,0,0,0,2,1,0,0,1,-1,
chr10	106033219	106033958	MACS_peak_815	194.47	INTRAGENIC	NM_001205341	chr10	+	105907365	106370524	105911689	106366168	32	105907365,105911687,105994301,106180542,106199038,106204529,106237792,106256391,106265944,106267621,106272751,106273107,106274336,106279741,106291992,106294464,106295216,106296832,106300309,106302302,106306934,106330487,106333373,106340698,106341872,106343421,106344768,106350620,106352736,106364758,106366109,106368178,	105907647,105911938,105994355,106180644,106199203,106204604,106237909,106256613,106266091,106267756,106272835,106273239,106274399,106279833,106292128,106294685,106295454,106296862,106300440,106302457,106307028,106330569,106333574,106340761,106341902,106343615,106344866,106350796,106352805,106364918,106366201,106370524,	0	Ppfia2	cmpl	cmpl	-1,0,0,0,0,0,0,0,0,0,0,0,0,0,2,0,2,0,0,2,1,2,0,0,0,0,2,1,0,0,1,-1,
chr10	106053004	106053547	MACS_peak_816	54.79	INTRAGENIC	NM_177373	chr10	+	105907365	106370524	105911689	106366168	32	105907365,105911687,105994301,106180542,106199038,106204529,106237792,106256391,106265944,106267621,106272751,106273107,106274336,106279741,106291992,106294464,106295216,106296832,106300309,106302305,106306934,106330487,106333373,106340698,106341872,106343421,106344768,106350620,106352736,106364758,106366109,106368178,	105907647,105911938,105994355,106180644,106199203,106204604,106237909,106256613,106266091,106267756,106272835,106273239,106274399,106279833,106292128,106294685,106295454,106296862,106300440,106302457,106307028,106330569,106333574,106340761,106341902,106343615,106344866,106350796,106352805,106364918,106366201,106370524,	0	Ppfia2	cmpl	cmpl	-1,0,0,0,0,0,0,0,0,0,0,0,0,0,2,0,2,0,0,2,1,2,0,0,0,0,2,1,0,0,1,-1,
chr10	106053004	106053547	MACS_peak_816	54.79	INTRAGENIC	NM_001205341	chr10	+	105907365	106370524	105911689	106366168	32	105907365,105911687,105994301,106180542,106199038,106204529,106237792,106256391,106265944,106267621,106272751,106273107,106274336,106279741,106291992,106294464,106295216,106296832,106300309,106302302,106306934,106330487,106333373,106340698,106341872,106343421,106344768,106350620,106352736,106364758,106366109,106368178,	105907647,105911938,105994355,106180644,106199203,106204604,106237909,106256613,106266091,106267756,106272835,106273239,106274399,106279833,106292128,106294685,106295454,106296862,106300440,106302457,106307028,106330569,106333574,106340761,106341902,106343615,106344866,106350796,106352805,106364918,106366201,106370524,	0	Ppfia2	cmpl	cmpl	-1,0,0,0,0,0,0,0,0,0,0,0,0,0,2,0,2,0,0,2,1,2,0,0,0,0,2,1,0,0,1,-1,
chr10	106298901	106299468	MACS_peak_817	52.8	INTRAGENIC	NM_177373	chr10	+	105907365	106370524	105911689	106366168	32	105907365,105911687,105994301,106180542,106199038,106204529,106237792,106256391,106265944,106267621,106272751,106273107,106274336,106279741,106291992,106294464,106295216,106296832,106300309,106302305,106306934,106330487,106333373,106340698,106341872,106343421,106344768,106350620,106352736,106364758,106366109,106368178,	105907647,105911938,105994355,106180644,106199203,106204604,106237909,106256613,106266091,106267756,106272835,106273239,106274399,106279833,106292128,106294685,106295454,106296862,106300440,106302457,106307028,106330569,106333574,106340761,106341902,106343615,106344866,106350796,106352805,106364918,106366201,106370524,	0	Ppfia2	cmpl	cmpl	-1,0,0,0,0,0,0,0,0,0,0,0,0,0,2,0,2,0,0,2,1,2,0,0,0,0,2,1,0,0,1,-1,
chr10	106298901	106299468	MACS_peak_817	52.8	INTRAGENIC	NM_001205341	chr10	+	105907365	106370524	105911689	106366168	32	105907365,105911687,105994301,106180542,106199038,106204529,106237792,106256391,106265944,106267621,106272751,106273107,106274336,106279741,106291992,106294464,106295216,106296832,106300309,106302302,106306934,106330487,106333373,106340698,106341872,106343421,106344768,106350620,106352736,106364758,106366109,106368178,	105907647,105911938,105994355,106180644,106199203,106204604,106237909,106256613,106266091,106267756,106272835,106273239,106274399,106279833,106292128,106294685,106295454,106296862,106300440,106302457,106307028,106330569,106333574,106340761,106341902,106343615,106344866,106350796,106352805,106364918,106366201,106370524,	0	Ppfia2	cmpl	cmpl	-1,0,0,0,0,0,0,0,0,0,0,0,0,0,2,0,2,0,0,2,1,2,0,0,0,0,2,1,0,0,1,-1,
chr10	107429461	107430262	MACS_peak_818	114.47	NONE
chr10	107480672	107481175	MACS_peak_819	58.35	NONE
chr10	107609957	107610582	MACS_peak_820	85.17	TSS	NM_027892	chr10	+	107599455	107714631	107599455	107711225	26	107599455,107635888,107651443,107667492,107671054,107677160,107677834,107678176,107680061,107686490,107687969,107688895,107689812,107690380,107696811,107697891,107698300,107699365,107701758,107704459,107705627,107706309,107708777,107710450,107711193,107714262,	107599692,107636019,107651562,107667652,107671199,107677235,107677923,107678334,107680186,107686706,107688064,107689000,107689980,107690551,107696902,107698092,107698472,107699487,107701824,107704476,107705763,107706414,107708825,107710481,107711244,107714631,	0	Ppp1r12a	cmpl	cmpl	0,0,2,1,2,0,0,2,1,0,0,2,2,2,2,0,0,1,0,0,2,0,0,0,1,-1,
chr10	107730648	107731219	MACS_peak_821	52.48	DOWNSTREAM	NM_027892	chr10	+	107599455	107714631	107599455	107711225	26	107599455,107635888,107651443,107667492,107671054,107677160,107677834,107678176,107680061,107686490,107687969,107688895,107689812,107690380,107696811,107697891,107698300,107699365,107701758,107704459,107705627,107706309,107708777,107710450,107711193,107714262,	107599692,107636019,107651562,107667652,107671199,107677235,107677923,107678334,107680186,107686706,107688064,107689000,107689980,107690551,107696902,107698092,107698472,107699487,107701824,107704476,107705763,107706414,107708825,107710481,107711244,107714631,	0	Ppp1r12a	cmpl	cmpl	0,0,2,1,2,0,0,2,1,0,0,2,2,2,2,0,0,1,0,0,2,0,0,0,1,-1,
chr10	107815235	107816023	MACS_peak_822	70.21	INTRAGENIC	NM_054056	chr10	+	107769244	107851447	107769872	107850810	7	107769244,107769743,107819785,107828753,107846518,107849019,107850723,	107769304,107770367,107819917,107828788,107846666,107849124,107851447,	0	Pawr	cmpl	cmpl	-1,0,0,0,2,0,0,
chr10	107828534	107828939	MACS_peak_823	60.38	INTRAGENIC	NM_054056	chr10	+	107769244	107851447	107769872	107850810	7	107769244,107769743,107819785,107828753,107846518,107849019,107850723,	107769304,107770367,107819917,107828788,107846666,107849124,107851447,	0	Pawr	cmpl	cmpl	-1,0,0,0,2,0,0,
chr10	107941704	107942246	MACS_peak_824	140.37	NONE
chr10	108018265	108018763	MACS_peak_825	51.35	NONE
chr10	109088449	109089138	MACS_peak_826	78.79	NONE
chr10	109233757	109234317	MACS_peak_827	60.64	NONE
chr10	109280764	109281372	MACS_peak_828	87	NONE
chr10	109677513	109678298	MACS_peak_829	116.26	NONE
chr10	110447082	110447602	MACS_peak_830	56.8	TSS	NM_172554	chr10	-	110378835	110447122	110381448	110447086	17	110378835,110382524,110383222,110384354,110385246,110386676,110387616,110392119,110393341,110398067,110404739,110405484,110410803,110411399,110419051,110422995,110446993,	110381587,110382619,110383380,110384438,110385340,110386739,110387739,110392222,110393484,110398193,110404902,110405549,110410948,110411477,110419174,110423099,110447122,	0	Zdhhc17	cmpl	cmpl	2,0,1,1,0,0,0,2,0,0,2,0,2,2,2,0,0,
chr10	110620594	110621220	MACS_peak_831	69.58	TSS	NM_001003717	chr10	+	110601857	110734303	110670655	110730280	23	110601857,110641790,110670608,110692743,110700235,110702590,110704660,110706413,110707546,110709129,110710081,110712046,110713515,110714302,110717345,110719182,110721385,110723171,110724882,110725748,110726844,110728546,110730147,	110602252,110641896,110670746,110692814,110700313,110702692,110704864,110706498,110707718,110709367,110710266,110712128,110713614,110714399,110717444,110719280,110721475,110723308,110725068,110725836,110726950,110728649,110734303,	0	Osbpl8	cmpl	cmpl	-1,-1,0,1,0,0,0,0,1,2,0,2,0,0,1,1,0,0,2,2,0,1,2,
chr10	110735321	110736089	MACS_peak_832	71.83	DOWNSTREAM	NM_001003717	chr10	+	110601857	110734303	110670655	110730280	23	110601857,110641790,110670608,110692743,110700235,110702590,110704660,110706413,110707546,110709129,110710081,110712046,110713515,110714302,110717345,110719182,110721385,110723171,110724882,110725748,110726844,110728546,110730147,	110602252,110641896,110670746,110692814,110700313,110702692,110704864,110706498,110707718,110709367,110710266,110712128,110713614,110714399,110717444,110719280,110721475,110723308,110725068,110725836,110726950,110728649,110734303,	0	Osbpl8	cmpl	cmpl	-1,-1,0,1,0,0,0,0,1,2,0,2,0,0,1,1,0,0,2,2,0,1,2,
chr10	110735321	110736089	MACS_peak_832	71.83	DOWNSTREAM	NM_175489	chr10	+	110601857	110734303	110641854	110730280	24	110601857,110641790,110661727,110670608,110692743,110700235,110702590,110704660,110706413,110707546,110709129,110710081,110712046,110713515,110714302,110717345,110719182,110721385,110723171,110724882,110725748,110726844,110728546,110730147,	110602252,110641896,110661764,110670746,110692814,110700313,110702692,110704864,110706498,110707718,110709367,110710266,110712128,110713614,110714399,110717444,110719280,110721475,110723308,110725068,110725836,110726950,110728649,110734303,	0	Osbpl8	cmpl	cmpl	-1,0,0,1,1,0,0,0,0,1,2,0,2,0,0,1,1,0,0,2,2,0,1,2,
chr10	110735321	110736089	MACS_peak_832	71.83	TSS	NM_027914	chr10	+	110735734	110738792	110735778	110738225	2	110735734,110736268,	110735963,110738792,	0	Bbs10	cmpl	cmpl	0,2,
chr10	110944192	110945205	MACS_peak_833	87.14	DOWNSTREAM	NM_015781	chr10	+	110910247	110933942	110918355	110933131	16	110910247,110918335,110922554,110923699,110927083,110927432,110928064,110929142,110929897,110930352,110930605,110931226,110931850,110932380,110933095,110933809,	110910407,110918372,110922640,110923802,110927225,110927513,110928193,110929214,110930037,110930498,110930625,110931349,110931880,110932431,110933161,110933942,	0	Nap1l1	cmpl	cmpl	-1,0,2,1,2,0,0,0,0,2,1,0,0,0,0,-1,
chr10	110944192	110945205	MACS_peak_833	87.14	TSS	NM_009344	chr10	+	110943341	110945705	110943460	110944678	2	110943341,110945115,	110944704,110945705,	0	Phlda1	cmpl	cmpl	0,-1,
chr10	110976720	110977308	MACS_peak_834	81.09	NONE
chr10	111035555	111036198	MACS_peak_835	75.55	TSS	NR_045344	chr10	-	111023774	111031329	111031329	111031329	4	111023774,111025982,111031004,111031159,	111024537,111026136,111031061,111031329,	0	4933440J02Rik	unk	unk	-1,-1,-1,-1,
chr10	111231784	111232358	MACS_peak_836	59.41	NONE
chr10	112240355	112240953	MACS_peak_837	57.37	DOWNSTREAM	NR_040579	chr10	+	112163981	112222655	112222655	112222655	7	112163981,112171928,112193481,112194274,112196522,112219744,112222498,	112164036,112172059,112193628,112194467,112196665,112219805,112222655,	0	1700010J16Rik	unk	unk	-1,-1,-1,-1,-1,-1,-1,
chr10	112365693	112366342	MACS_peak_838	74.98	TSS	NM_001033474	chr10	-	112362483	112366082	112365484	112365778	1	112362483,	112366082,	0	Atxn7l3b	cmpl	cmpl	0,
chr10	112466865	112467297	MACS_peak_839	57.52	NONE
chr10	113030414	113030975	MACS_peak_840	53.29	NONE
chr10	113043429	113043918	MACS_peak_841	52.14	NONE
chr10	114137140	114137644	MACS_peak_842	50.84	NONE
chr10	114689107	114689626	MACS_peak_843	56.89	TSS	NM_025706	chr10	-	114634926	114688549	114636607	114688467	17	114634926,114639559,114640173,114645952,114646612,114647251,114649746,114654617,114655606,114656207,114657266,114658638,114666180,114670175,114676327,114677904,114688437,	114636820,114639646,114640290,114646050,114646712,114647352,114649863,114654712,114655710,114656336,114657464,114658741,114666391,114670314,114676402,114678003,114688549,	0	Tbc1d15	cmpl	cmpl	0,0,0,1,0,1,1,2,0,0,0,2,1,0,0,0,0,
chr10	114752280	114752976	MACS_peak_844	201.95	DOWNSTREAM	NM_133683	chr10	-	114777795	114799318	114779561	114798994	7	114777795,114780753,114784087,114784701,114796709,114798864,114799107,	114779725,114780963,114784342,114784839,114796823,114799015,114799318,	0	Tmem19	cmpl	cmpl	1,1,1,1,1,0,-1,
chr10	114752280	114752976	MACS_peak_844	201.95	TSS	NM_024454	chr10	-	114726917	114752647	114727827	114752402	7	114726917,114731926,114732484,114735883,114738578,114739787,114752249,	114727967,114732015,114732539,114735947,114738686,114739847,114752647,	0	Rab21	cmpl	cmpl	1,2,1,0,0,0,0,
chr10	114786003	114786554	MACS_peak_845	54.11	DOWNSTREAM	NM_025780	chr10	-	114807021	114821491	114809615	114821331	3	114807021,114813407,114821260,	114810002,114813603,114821491,	0	Thap2	cmpl	cmpl	0,2,0,
chr10	114821339	114821912	MACS_peak_846	52.32	TSS	NM_025780	chr10	-	114807021	114821491	114809615	114821331	3	114807021,114813407,114821260,	114810002,114813603,114821491,	0	Thap2	cmpl	cmpl	0,2,0,
chr10	114993361	114994453	MACS_peak_847	270.59	UPSTREAM	NM_029982	chr10	+	115007041	115019510	115007233	115019052	5	115007041,115015330,115015496,115016856,115019045,	115007337,115015417,115015526,115016985,115019510,	0	A930009A15Rik	cmpl	cmpl	0,2,2,2,2,
chr10	114993361	114994453	MACS_peak_847	270.59	TSS	NM_010195	chr10	-	114887369	115024836	114889069	115024549	18	114887369,114891501,114893703,114894812,114895696,114897868,114899757,114903185,114903397,114903611,114907619,114909022,114912229,114915442,114932225,114939422,114957661,115024337,	114890157,114891585,114893849,114894938,114895768,114897940,114899823,114903257,114903466,114903683,114907691,114909091,114912301,114915658,114932297,114939494,114957733,115024836,	0	Lgr5	cmpl	cmpl	1,1,2,2,2,2,2,2,2,2,2,2,2,2,2,2,2,0,
chr10	115820033	115820534	MACS_peak_848	51.1	INTRAGENIC	NM_029928	chr10	+	115738429	115826594	115738681	115820931	32	115738429,115739163,115750869,115752097,115754421,115756388,115759480,115765005,115768264,115775671,115776473,115777946,115778435,115780848,115783854,115784982,115787021,115787821,115790846,115794247,115798263,115799399,115799579,115799699,115800334,115801030,115804536,115805748,115806351,115809896,115817887,115820908,	115738735,115739437,115751148,115752355,115754685,115756658,115759741,115765272,115768528,115775935,115776737,115778210,115778705,115781112,115784118,115785264,115787300,115787971,115791090,115794354,115798363,115799483,115799597,115799781,115800425,115801107,115804671,115805871,115806515,115810032,115818008,115826594,	0	Ptprb	cmpl	cmpl	0,0,1,1,1,1,1,1,1,1,1,1,1,1,1,1,1,1,1,2,1,2,2,2,0,1,0,0,0,2,0,1,
chr10	115908736	115909589	MACS_peak_849	101.18	DOWNSTREAM	NM_028082	chr10	-	115922216	116018567	115923255	115986136	15	115922216,115929347,115930748,115931878,115932015,115935141,115935393,115936397,115938247,115941090,115943284,115944096,115954372,115986088,116018508,	115923342,115929492,115930849,115931928,115932077,115935298,115935514,115936522,115938373,115941170,115943467,115944244,115954439,115986231,116018567,	0	Cnot2	cmpl	cmpl	0,2,0,1,2,1,0,1,1,2,2,1,0,0,-1,
chr10	115908736	115909589	MACS_peak_849	101.18	DOWNSTREAM	NR_024327	chr10	-	115922216	116018567	116018567	116018567	14	115922216,115929347,115930748,115931878,115932015,115935141,115935393,115936397,115938247,115941090,115943284,115944096,115986088,116018508,	115923342,115929492,115930849,115931928,115932077,115935298,115935514,115936522,115938373,115941170,115943467,115944244,115986231,116018567,	0	Cnot2	unk	unk	-1,-1,-1,-1,-1,-1,-1,-1,-1,-1,-1,-1,-1,-1,
chr10	115908736	115909589	MACS_peak_849	101.18	DOWNSTREAM	NM_001037847	chr10	-	115922216	116018567	115923255	116018513	16	115922216,115929347,115930748,115931878,115932015,115935141,115935393,115936397,115938247,115941090,115943284,115944096,115954372,115964882,115986088,116018508,	115923342,115929492,115930849,115931928,115932077,115935298,115935514,115936522,115938373,115941170,115943467,115944244,115954439,115965005,115986161,116018567,	0	Cnot2	cmpl	cmpl	0,2,0,1,2,1,0,1,1,2,2,1,0,0,2,0,
chr10	115908736	115909589	MACS_peak_849	101.18	TSS	NM_021452	chr10	-	115854923	115910579	115855293	115910577	3	115854923,115883382,115910241,	115855462,115883510,115910579,	0	Kcnmb4	cmpl	cmpl	2,0,0,
chr10	116130730	116131338	MACS_peak_850	240.29	NONE
chr10	116218763	116219294	MACS_peak_851	55.82	NONE
chr10	116349584	116350242	MACS_peak_852	74.14	NONE
chr10	116354547	116354920	MACS_peak_853	79.68	NONE
chr10	117146961	117147508	MACS_peak_854	139.55	DOWNSTREAM	NM_027468	chr10	+	117066555	117124408	117066779	117120576	9	117066555,117066776,117096823,117105004,117107222,117108651,117112995,117117018,117120333,	117066583,117066939,117096921,117105177,117107407,117108822,117113148,117117167,117124408,	0	Cpm	cmpl	cmpl	-1,0,1,0,2,1,1,1,0,
chr10	117146961	117147508	MACS_peak_854	139.55	DOWNSTREAM	NM_029875	chr10	-	117170733	117183414	117173102	117183242	5	117170733,117177567,117177808,117181940,117182840,	117173289,117177650,117177967,117182051,117183414,	0	Slc35e3	cmpl	cmpl	2,0,0,0,0,
chr10	117146961	117147508	MACS_peak_854	139.55	TSS	NM_010786	chr10	-	117125960	117147772	117127265	117146836	12	117125960,117128200,117129637,117131960,117133008,117133436,117138620,117139257,117142210,117146755,117147001,117147607,	117127841,117128278,117129793,117132124,117133105,117133495,117138670,117139391,117142285,117146840,117147084,117147772,	0	Mdm2	cmpl	cmpl	0,0,0,1,0,1,2,0,0,0,-1,-1,
chr10	117147542	117148057	MACS_peak_855	81.01	DOWNSTREAM	NM_027468	chr10	+	117066555	117124408	117066779	117120576	9	117066555,117066776,117096823,117105004,117107222,117108651,117112995,117117018,117120333,	117066583,117066939,117096921,117105177,117107407,117108822,117113148,117117167,117124408,	0	Cpm	cmpl	cmpl	-1,0,1,0,2,1,1,1,0,
chr10	117147542	117148057	MACS_peak_855	81.01	DOWNSTREAM	NM_029875	chr10	-	117170733	117183414	117173102	117183242	5	117170733,117177567,117177808,117181940,117182840,	117173289,117177650,117177967,117182051,117183414,	0	Slc35e3	cmpl	cmpl	2,0,0,0,0,
chr10	117147542	117148057	MACS_peak_855	81.01	TSS	NM_010786	chr10	-	117125960	117147772	117127265	117146836	12	117125960,117128200,117129637,117131960,117133008,117133436,117138620,117139257,117142210,117146755,117147001,117147607,	117127841,117128278,117129793,117132124,117133105,117133495,117138670,117139391,117142285,117146840,117147084,117147772,	0	Mdm2	cmpl	cmpl	0,0,0,1,0,1,2,0,0,0,-1,-1,
chr10	117229585	117230134	MACS_peak_856	54.28	DOWNSTREAM	NM_024457	chr10	-	117251652	117283030	117254429	117261706	8	117251652,117254399,117255521,117257517,117258645,117259856,117261649,117282886,	117252836,117254516,117255665,117257658,117258702,117259925,117261730,117283030,	0	Rap1b	cmpl	cmpl	-1,0,0,0,0,0,0,-1,
chr10	117229585	117230134	MACS_peak_856	54.28	TSS	NM_134010	chr10	-	117187698	117229761	117187915	117229667	28	117187698,117188375,117194322,117194951,117196227,117198300,117199078,117200786,117201372,117202966,117203389,117207243,117207431,117208389,117210110,117210331,117211511,117213266,117214184,117214648,117217733,117218376,117219012,117222050,117224848,117227029,117227522,117229659,	117188023,117188543,117194436,117195077,117196388,117198403,117199191,117200937,117201411,117203085,117203459,117207292,117207577,117208449,117210187,117210422,117211625,117213345,117214273,117214720,117217782,117218504,117219116,117222195,117224967,117227116,117227614,117229761,	0	Nup107	cmpl	cmpl	0,0,0,0,1,0,1,0,0,1,0,2,0,0,1,0,0,2,0,0,2,0,1,0,1,1,2,0,
chr10	117283013	117283545	MACS_peak_857	63.23	TSS	NM_024457	chr10	-	117251652	117283030	117254429	117261706	8	117251652,117254399,117255521,117257517,117258645,117259856,117261649,117282886,	117252836,117254516,117255665,117257658,117258702,117259925,117261730,117283030,	0	Rap1b	cmpl	cmpl	-1,0,0,0,0,0,0,-1,
chr10	118001627	118002203	MACS_peak_858	52.08	NONE
chr10	119248471	119248841	MACS_peak_859	62.3	TSS	NM_133442	chr10	+	118891369	119512649	118891420	119512573	22	118891369,119366956,119368299,119375299,119379917,119382081,119412925,119415493,119423387,119436807,119437581,119447261,119455128,119457016,119472406,119475346,119475654,119486406,119487060,119491888,119509686,119512345,	118891478,119367092,119368445,119375383,119379993,119382227,119413073,119415663,119423540,119436994,119437727,119447342,119455198,119457162,119472551,119475486,119475849,119486563,119487172,119492122,119509833,119512649,	0	Grip1	cmpl	cmpl	0,1,2,1,1,2,1,2,1,1,2,1,1,2,1,2,1,1,2,0,0,0,
chr10	120169802	120170594	MACS_peak_860	91.79	NONE
chr10	120313202	120313847	MACS_peak_861	107.64	DOWNSTREAM	NR_038023	chr10	+	120294684	120300384	120300384	120300384	3	120294684,120296003,120297656,	120294817,120296115,120300384,	0	Gm15910	unk	unk	-1,-1,-1,
chr10	120313202	120313847	MACS_peak_861	107.64	TSS	NM_177092	chr10	-	120218156	120336027	120221123	120308166	7	120218156,120228457,120262163,120287031,120289039,120308090,120335888,	120221294,120228555,120262192,120287109,120289148,120308207,120336027,	0	Msrb3	cmpl	cmpl	0,1,2,2,1,0,-1,
chr10	120492264	120492824	MACS_peak_862	60.64	INTRAGENIC	NM_011915	chr10	+	120471059	120537698	120471398	120536935	10	120471059,120472021,120512301,120519181,120520943,120521964,120527166,120533054,120533696,120536813,	120471546,120472161,120512410,120519322,120521039,120522060,120527262,120533150,120533792,120537698,	0	Wif1	cmpl	cmpl	0,1,0,1,1,1,1,1,1,1,
chr10	120588524	120589092	MACS_peak_863	52.72	NONE
chr10	121301344	121302188	MACS_peak_864	65.92	NONE
chr10	121533965	121534561	MACS_peak_865	50.53	UPSTREAM	NR_027637	chr10	+	121556752	121567614	121567614	121567614	3	121556752,121564055,121567454,	121556965,121564202,121567614,	0	Gm4489	unk	unk	-1,-1,-1,
chr10	121533965	121534561	MACS_peak_865	50.53	TSS	NM_153059	chr10	-	121518315	121534158	121518327	121534127	6	121518315,121525934,121527515,121531645,121532994,121533955,	121518745,121526105,121527830,121531748,121533150,121534158,	0	Tmem5	cmpl	cmpl	2,2,2,1,1,0,
chr10	122079502	122080150	MACS_peak_866	60.39	NONE
chr10	122280754	122281559	MACS_peak_867	156.58	INTRAGENIC	NM_176919	chr10	+	122115817	122359030	122116241	122357917	9	122115817,122219238,122239290,122248502,122294117,122315564,122341147,122344562,122357749,	122116486,122219401,122239635,122248615,122294202,122315683,122341211,122344670,122359030,	0	Ppm1h	cmpl	cmpl	0,2,0,0,2,0,2,0,0,
chr10	122280754	122281559	MACS_peak_867	156.58	INTRAGENIC	NM_001110218	chr10	+	122115817	122382849	122116241	122378428	10	122115817,122219238,122239290,122248502,122294117,122315564,122341147,122344562,122357749,122378280,	122116486,122219401,122239635,122248615,122294202,122315683,122341211,122344670,122357901,122382849,	0	Ppm1h	cmpl	cmpl	0,2,0,0,2,0,2,0,0,2,
chr10	122328387	122328882	MACS_peak_868	51.61	INTRAGENIC	NM_176919	chr10	+	122115817	122359030	122116241	122357917	9	122115817,122219238,122239290,122248502,122294117,122315564,122341147,122344562,122357749,	122116486,122219401,122239635,122248615,122294202,122315683,122341211,122344670,122359030,	0	Ppm1h	cmpl	cmpl	0,2,0,0,2,0,2,0,0,
chr10	122328387	122328882	MACS_peak_868	51.61	INTRAGENIC	NM_001110218	chr10	+	122115817	122382849	122116241	122378428	10	122115817,122219238,122239290,122248502,122294117,122315564,122341147,122344562,122357749,122378280,	122116486,122219401,122239635,122248615,122294202,122315683,122341211,122344670,122357901,122382849,	0	Ppm1h	cmpl	cmpl	0,2,0,0,2,0,2,0,0,2,
chr10	122400662	122401219	MACS_peak_869	60.91	DOWNSTREAM	NM_001110218	chr10	+	122115817	122382849	122116241	122378428	10	122115817,122219238,122239290,122248502,122294117,122315564,122341147,122344562,122357749,122378280,	122116486,122219401,122239635,122248615,122294202,122315683,122341211,122344670,122357901,122382849,	0	Ppm1h	cmpl	cmpl	0,2,0,0,2,0,2,0,0,2,
chr10	122400662	122401219	MACS_peak_869	60.91	DOWNSTREAM	NR_029527	chr10	-	122422695	122422780	122422780	122422780	1	122422695,	122422780,	0	Mirlet7i	unk	unk	-1,
chr10	122562070	122562510	MACS_peak_870	56.72	NONE
chr10	122914155	122914824	MACS_peak_871	65.79	INTRAGENIC	NM_182807	chr10	+	122701131	123178260	122867968	123175971	6	122701131,122867767,123030549,123141414,123142755,123175959,	122702597,122867979,123030656,123141567,123142880,123178260,	0	Fam19a2	cmpl	cmpl	-1,0,2,1,1,0,
chr10	122914155	122914824	MACS_peak_871	65.79	TSS	NR_045514	chr10	+	122701131	123178260	123178260	123178260	6	122701131,123030549,123141414,123142755,123167137,123175959,	122702597,123030656,123141567,123142880,123167383,123178260,	0	Fam19a2	unk	unk	-1,-1,-1,-1,-1,-1,
chr10	123533146	123533569	MACS_peak_872	121.55	NONE
chr10	123734349	123734784	MACS_peak_873	57.22	NONE
chr10	125418913	125419683	MACS_peak_874	78.87	INTRAGENIC	NM_177152	chr10	+	125403274	125452415	125403531	125451976	19	125403274,125409176,125409448,125431473,125432489,125433670,125434117,125434659,125436005,125437144,125439456,125439997,125443743,125445525,125446842,125447956,125450065,125450307,125451731,	125403767,125409248,125409523,125431605,125432633,125433814,125434261,125434803,125436086,125437216,125439528,125440161,125444064,125445807,125447295,125448115,125450209,125450577,125452415,	0	Lrig3	cmpl	cmpl	0,2,2,2,2,2,2,2,2,2,2,2,1,1,1,1,1,1,1,
chr10	125424690	125425412	MACS_peak_875	159.34	INTRAGENIC	NM_177152	chr10	+	125403274	125452415	125403531	125451976	19	125403274,125409176,125409448,125431473,125432489,125433670,125434117,125434659,125436005,125437144,125439456,125439997,125443743,125445525,125446842,125447956,125450065,125450307,125451731,	125403767,125409248,125409523,125431605,125432633,125433814,125434261,125434803,125436086,125437216,125439528,125440161,125444064,125445807,125447295,125448115,125450209,125450577,125452415,	0	Lrig3	cmpl	cmpl	0,2,2,2,2,2,2,2,2,2,2,2,1,1,1,1,1,1,1,
chr10	125497127	125497624	MACS_peak_876	66.7	NONE
chr10	125694108	125695087	MACS_peak_877	177.36	NONE
chr10	125889176	125889961	MACS_peak_878	77.57	NONE
chr10	126415415	126416032	MACS_peak_879	55.83	UPSTREAM	NR_029803	chr10	+	126432585	126432669	126432669	126432669	1	126432585,	126432669,	0	Mir26a-2	unk	unk	-1,
chr10	126415415	126416032	MACS_peak_879	55.83	UPSTREAM	NR_030259	chr10	+	126435495	126435616	126435616	126435616	1	126435495,	126435616,	0	Mir546	unk	unk	-1,
chr10	126415415	126416032	MACS_peak_879	55.83	UPSTREAM	NM_009635	chr10	+	126437764	126458050	126440440	126457619	20	126437764,126440421,126441752,126443550,126444596,126444795,126445187,126445818,126446016,126446784,126447032,126447577,126447956,126448754,126450563,126451154,126453365,126454019,126455441,126457505,	126437887,126440506,126441827,126443747,126444705,126444906,126445390,126445897,126446115,126446938,126447133,126447715,126448115,126448934,126450709,126451299,126453554,126454088,126455567,126458050,	0	Avil	cmpl	cmpl	-1,0,0,0,2,0,0,2,0,0,1,0,0,0,0,2,0,0,0,0,
chr10	126415415	126416032	MACS_peak_879	55.83	TSS	NM_001113470	chr10	+	126415772	126437031	126416293	126433542	8	126415772,126428586,126429654,126430063,126430907,126432910,126433081,126433416,	126416357,126428732,126429693,126430165,126430964,126433003,126433267,126437031,	0	Ctdsp2	cmpl	cmpl	0,1,0,0,0,0,0,0,
chr10	126500242	126500780	MACS_peak_880	70.4	TSS	NM_009870	chr10	+	126500658	126504338	126501291	126504077	8	126500658,126501275,126501640,126501890,126502210,126503008,126503156,126503984,	126500815,126501509,126501776,126502058,126502320,126503059,126503292,126504338,	0	Cdk4	cmpl	cmpl	-1,0,2,0,0,2,2,0,
chr10	126621577	126622161	MACS_peak_881	51.45	DOWNSTREAM	NM_027739	chr10	+	126602886	126609396	126602952	126608889	10	126602886,126603773,126604054,126604557,126604756,126606799,126607033,126607646,126607974,126608671,	126603278,126603938,126604161,126604598,126604937,126606898,126607224,126607787,126608215,126609396,	0	B4galnt1	cmpl	cmpl	0,2,2,1,0,1,1,0,0,1,
chr10	126621577	126622161	MACS_peak_881	51.45	DOWNSTREAM	NM_054097	chr10	-	126634122	126648678	126636119	126648567	10	126634122,126636368,126636644,126637239,126637895,126638094,126642730,126643669,126645925,126648393,	126636200,126636472,126636912,126637353,126637934,126638241,126642874,126643766,126646023,126648678,	0	Pip4k2c	cmpl	cmpl	0,1,0,0,0,0,0,2,0,0,
chr10	126621577	126622161	MACS_peak_881	51.45	UPSTREAM	NR_045715	chr10	+	126632304	126639699	126639699	126639699	4	126632304,126633824,126634192,126637580,	126632580,126633923,126634250,126639699,	0	F420014N23Rik	unk	unk	-1,-1,-1,-1,
chr10	126621577	126622161	MACS_peak_881	51.45	DOWNSTREAM	NR_045166	chr10	+	126602211	126609396	126609396	126609396	10	126602211,126603059,126603773,126604054,126604557,126606799,126607033,126607646,126607974,126608671,	126602575,126603278,126603938,126604161,126604598,126606898,126607224,126607787,126608215,126609396,	0	B4galnt1	unk	unk	-1,-1,-1,-1,-1,-1,-1,-1,-1,-1,
chr10	126621577	126622161	MACS_peak_881	51.45	TSS	NM_177615	chr10	-	126609481	126617701	126609593	126617653	17	126609481,126610330,126610537,126610679,126610964,126611154,126611339,126611861,126612040,126613627,126613862,126614142,126614993,126615398,126615784,126616680,126617286,	126609632,126610437,126610592,126610766,126611081,126611224,126611446,126611957,126612118,126613741,126614010,126614225,126615146,126615563,126615942,126616791,126617701,	0	Slc26a10	cmpl	cmpl	0,1,0,0,0,2,0,0,0,0,2,0,0,0,1,1,0,
chr10	126674343	126674939	MACS_peak_882	57.54	NONE
chr10	126726283	126727108	MACS_peak_883	111.87	DOWNSTREAM	NM_027151	chr10	+	126703317	126719015	126703554	126718543	14	126703317,126704469,126711769,126712049,126712879,126713439,126713757,126714310,126714542,126714750,126714922,126715175,126715372,126718456,	126703590,126704538,126711866,126712111,126712978,126713600,126713905,126714376,126714581,126714828,126714994,126715278,126715464,126719015,	0	Dctn2	cmpl	cmpl	0,0,0,1,0,0,2,0,0,0,0,0,1,0,
chr10	126726283	126727108	MACS_peak_883	111.87	DOWNSTREAM	NM_001003913	chr10	-	126733276	126748842	126733349	126748685	21	126733276,126733596,126733928,126734521,126734790,126734977,126736303,126737004,126737233,126737465,126739867,126741240,126742477,126742796,126745313,126745556,126745963,126747059,126747275,126747499,126748576,	126733496,126733689,126734000,126734708,126734895,126735109,126736517,126737122,126737329,126737636,126739942,126741442,126742681,126742913,126745420,126745735,126746039,126747194,126747354,126747590,126748842,	0	Mars	cmpl	cmpl	0,0,0,2,2,2,1,0,0,0,0,2,2,2,0,1,0,0,2,1,0,
chr10	126726283	126727108	MACS_peak_883	111.87	DOWNSTREAM	NM_001190454	chr10	+	126703317	126719015	126703554	126718543	14	126703317,126704469,126711768,126712049,126712879,126713439,126713757,126714310,126714542,126714750,126714922,126715175,126715372,126718456,	126703590,126704538,126711866,126712111,126712978,126713600,126713905,126714376,126714581,126714828,126714994,126715278,126715464,126719015,	0	Dctn2	cmpl	cmpl	0,0,2,1,0,0,2,0,0,0,0,0,1,0,
chr10	126726283	126727108	MACS_peak_883	111.87	DOWNSTREAM	NM_001171582	chr10	-	126733276	126748842	126733349	126748685	22	126733276,126733596,126733772,126733928,126734521,126734790,126734977,126736303,126737004,126737233,126737465,126739867,126741240,126742477,126742796,126745313,126745556,126745963,126747059,126747275,126747499,126748576,	126733496,126733689,126733796,126734000,126734708,126734895,126735109,126736517,126737122,126737329,126737636,126739942,126741442,126742681,126742913,126745420,126745735,126746039,126747194,126747354,126747590,126748842,	0	Mars	cmpl	cmpl	0,0,0,0,2,2,2,1,0,0,0,0,2,2,2,0,1,0,0,2,1,0,
chr10	126726283	126727108	MACS_peak_883	111.87	TSS	NM_033072	chr10	-	126719011	126725827	126719888	126724570	13	126719011,126720080,126720447,126720581,126721098,126721390,126721753,126722587,126723849,126724123,126724451,126724682,126725764,	126719963,126720144,126720500,126720998,126721271,126721541,126722412,126723628,126724012,126724226,126724594,126724746,126725827,	0	Mbd6	cmpl	cmpl	0,2,0,0,1,0,1,1,0,2,0,-1,-1,
chr10	126952117	126952886	MACS_peak_884	51.54	DOWNSTREAM	NM_027900	chr10	+	126857922	126936440	126881366	126935765	24	126857922,126881331,126889047,126889747,126891685,126894705,126895194,126895865,126896522,126902037,126902186,126908823,126913575,126918748,126921031,126921561,126921917,126922471,126924830,126929624,126932076,126934217,126934596,126935424,	126858422,126881531,126889089,126889834,126891812,126894784,126895254,126896006,126896631,126902069,126902240,126909056,126913754,126918811,126921274,126921688,126922078,126922626,126924931,126929794,126932224,126934315,126934681,126936440,	0	R3hdm2	cmpl	cmpl	-1,0,0,0,0,1,2,2,2,0,2,2,1,0,0,0,1,0,2,1,0,1,0,1,
chr10	126952117	126952886	MACS_peak_884	51.54	DOWNSTREAM	NM_001168293	chr10	+	126857922	126936440	126881366	126935765	24	126857922,126881331,126889047,126889747,126891685,126894705,126895194,126895865,126896522,126902037,126902186,126908823,126913575,126918748,126921031,126921561,126921917,126922471,126924830,126929624,126932076,126934217,126934596,126935424,	126858422,126881531,126889089,126889834,126891812,126894784,126895254,126896006,126896631,126902069,126902240,126909056,126913754,126918850,126921274,126921688,126922078,126922626,126924931,126929794,126932224,126934315,126934681,126936440,	0	R3hdm2	cmpl	cmpl	-1,0,0,0,0,1,2,2,2,0,2,2,1,0,0,0,1,0,2,1,0,1,0,1,
chr10	126952117	126952886	MACS_peak_884	51.54	DOWNSTREAM	NM_183297	chr10	-	126962528	126971615	126963161	126971488	2	126962528,126971431,	126964019,126971615,	0	Nxph4	cmpl	cmpl	0,0,
chr10	126952117	126952886	MACS_peak_884	51.54	TSS	NM_001098789	chr10	+	126951994	126954210	126952037	126953555	4	126951994,126952454,126953320,126953498,	126952094,126952543,126953381,126954210,	0	Ndufa4l2	cmpl	cmpl	0,0,2,0,
chr10	127027723	127028596	MACS_peak_885	84.49	NONE
chr10	127058432	127059396	MACS_peak_886	234.21	UPSTREAM	NM_009284	chr10	+	127080041	127098043	127083967	127097037	22	127080041,127083946,127084740,127085161,127087751,127088008,127088212,127089005,127089246,127090040,127090262,127091981,127092352,127093979,127094163,127094611,127095252,127095412,127095684,127096488,127096644,127096850,	127080305,127084083,127084879,127085245,127087890,127088061,127088361,127089137,127089435,127090128,127090385,127092074,127092559,127094074,127094300,127094758,127095316,127095517,127095756,127096554,127096773,127098043,	0	Stat6	cmpl	cmpl	-1,0,2,0,0,1,0,2,2,2,0,0,0,0,2,1,1,2,2,2,2,2,
chr10	127058432	127059396	MACS_peak_886	234.21	TSS	NM_008512	chr10	-	126975213	127058204	126976005	127057743	89	126975213,126976288,126976527,126976722,126976913,126977208,126977674,126978005,126978289,126978694,126979240,126979622,126980142,126981474,126982590,126982786,126983055,126983449,126983892,126985370,126985593,126986372,126986963,126987240,126987662,126988000,126988724,126989216,126989766,126990422,126990747,126991319,126991636,126992003,126992709,126993046,126993265,126993663,126993939,126994249…	126976146,126976433,126976618,126976787,126977015,126977383,126977836,126978179,126978430,126978871,126979357,126979729,126980321,126981743,126982710,126982921,126983196,126983572,126984012,126985503,126985700,126986489,126987089,126987363,126987782,126988117,126988818,126989365,126989955,126990628,126990935,126991439,126991722,126992187,126992900,126993187,126993388,126993792,126994056,126994372…	0	Lrp1	cmpl	cmpl	0,2,1,2,2,1,1,1,1,1,1,2,0,1,1,1,1,1,1,0,1,1,1,1,1,1,0,1,1,2,0,0,1,0,1,1,1,1,1,1,1,1,1,1,1,0,2,1,1,2,0,2,1,1,1,1,1,1,2,1,1,1,2,2,1,1,1,1,1,1,1,1,1,1,1,0,2,1,1,1,0,2,1,1,1,1,1,1,0,
chr10	127101936	127102445	MACS_peak_887	50.42	DOWNSTREAM	NM_009284	chr10	+	127080041	127098043	127083967	127097037	22	127080041,127083946,127084740,127085161,127087751,127088008,127088212,127089005,127089246,127090040,127090262,127091981,127092352,127093979,127094163,127094611,127095252,127095412,127095684,127096488,127096644,127096850,	127080305,127084083,127084879,127085245,127087890,127088061,127088361,127089137,127089435,127090128,127090385,127092074,127092559,127094074,127094300,127094758,127095316,127095517,127095756,127096554,127096773,127098043,	0	Stat6	cmpl	cmpl	-1,0,2,0,0,1,0,2,2,2,0,0,0,0,2,1,1,2,2,2,2,2,
chr10	127101936	127102445	MACS_peak_887	50.42	TSS	NR_045171	chr10	+	127104178	127105907	127105907	127105907	2	127104178,127105473,	127104439,127105907,	0	1700012D01Rik	unk	unk	-1,-1,
chr10	127104659	127105251	MACS_peak_888	57.87	DOWNSTREAM	NM_009284	chr10	+	127080041	127098043	127083967	127097037	22	127080041,127083946,127084740,127085161,127087751,127088008,127088212,127089005,127089246,127090040,127090262,127091981,127092352,127093979,127094163,127094611,127095252,127095412,127095684,127096488,127096644,127096850,	127080305,127084083,127084879,127085245,127087890,127088061,127088361,127089137,127089435,127090128,127090385,127092074,127092559,127094074,127094300,127094758,127095316,127095517,127095756,127096554,127096773,127098043,	0	Stat6	cmpl	cmpl	-1,0,2,0,0,1,0,2,2,2,0,0,0,0,2,1,1,2,2,2,2,2,
chr10	127104659	127105251	MACS_peak_888	57.87	TSS	NR_045171	chr10	+	127104178	127105907	127105907	127105907	2	127104178,127105473,	127104439,127105907,	0	1700012D01Rik	unk	unk	-1,-1,
chr10	127157883	127158750	MACS_peak_889	77.88	INTRAGENIC	NM_001081219	chr10	+	127142311	127157996	127142311	127157775	27	127142311,127142521,127142879,127143875,127144182,127144409,127144673,127147205,127147429,127147933,127148139,127149639,127149818,127150776,127151040,127151381,127151936,127152305,127152687,127152932,127153343,127155567,127156306,127156688,127156923,127157208,127157648,	127142425,127142637,127142974,127143980,127144229,127144473,127144772,127147309,127147577,127148052,127148226,127149705,127149923,127150839,127151241,127151608,127152137,127152399,127152837,127153001,127153418,127155702,127156413,127156821,127157076,127157336,127157996,	0	Myo1a	cmpl	cmpl	0,0,2,1,1,0,1,1,0,1,0,0,0,0,0,0,2,2,0,0,0,0,0,2,0,0,2,
chr10	127157883	127158750	MACS_peak_889	77.88	TSS	NM_001199971	chr10	+	127161533	127168824	127163084	127166587	8	127161533,127162478,127163066,127165226,127165502,127166169,127166531,127168604,	127161736,127162521,127163189,127165332,127165532,127166223,127166605,127168824,	0	Tac2	cmpl	cmpl	-1,-1,0,0,1,1,1,-1,
chr10	127184333	127184858	MACS_peak_890	114.79	UPSTREAM	NM_080436	chr10	+	127196818	127205355	127196993	127202594	4	127196818,127200020,127201737,127202376,	127197306,127200279,127201901,127205355,	0	Rdh1	cmpl	cmpl	0,1,2,1,
chr10	127184333	127184858	MACS_peak_890	114.79	DOWNSTREAM	NM_007412	chr10	-	127186657	127188854	127186939	127188136	2	127186657,127188655,	127188152,127188854,	0	Gpr182	cmpl	cmpl	0,-1,
chr10	127184333	127184858	MACS_peak_890	114.79	DOWNSTREAM	NM_001199971	chr10	+	127161533	127168824	127163084	127166587	8	127161533,127162478,127163066,127165226,127165502,127166169,127166531,127168604,	127161736,127162521,127163189,127165332,127165532,127166223,127166605,127168824,	0	Tac2	cmpl	cmpl	-1,-1,0,0,1,1,1,-1,
chr10	127184333	127184858	MACS_peak_890	114.79	INTRAGENIC	NM_198035	chr10	+	127176593	127184395	127178614	127180753	2	127176593,127178570,	127176718,127184395,	0	Zbtb39	cmpl	cmpl	-1,0,
chr10	127184333	127184858	MACS_peak_890	114.79	DOWNSTREAM	NM_009312	chr10	+	127162447	127168824	127163084	127166587	7	127162447,127163066,127165226,127165502,127166169,127166531,127168604,	127162521,127163189,127165332,127165532,127166223,127166605,127168824,	0	Tac2	cmpl	cmpl	-1,0,0,1,1,1,-1,
chr10	127341638	127342351	MACS_peak_891	151.5	INTRAGENIC	NM_027301	chr10	+	127335590	127348815	127335700	127347018	4	127335590,127339211,127340633,127346800,	127336001,127339470,127340797,127348815,	0	Sdr9c7	cmpl	cmpl	0,1,2,1,
chr10	127406964	127407365	MACS_peak_892	60.82	DOWNSTREAM	NM_013786	chr10	-	127427991	127444564	127428303	127435066	6	127427991,127430651,127431384,127434753,127437617,127444500,	127428521,127430815,127431643,127435080,127437732,127444564,	0	Hsd17b6	cmpl	cmpl	1,2,1,0,-1,-1,
chr10	127487727	127488239	MACS_peak_893	50.17	UPSTREAM	NM_019766	chr10	+	127496037	127514310	127496340	127513142	8	127496037,127505727,127506271,127507189,127509123,127511277,127512393,127513122,	127496342,127505841,127506341,127507288,127509213,127511340,127512418,127514310,	0	Ptges3	cmpl	cmpl	0,2,2,0,0,0,0,1,
chr10	127487727	127488239	MACS_peak_893	50.17	DOWNSTREAM	NM_013608	chr10	+	127472401	127485693	127473546	127485563	8	127472401,127473544,127483223,127483784,127484713,127485054,127485300,127485548,	127472739,127473616,127483309,127483862,127484860,127485183,127485423,127485693,	0	Naca	cmpl	cmpl	-1,0,1,0,0,0,0,0,
chr10	127487727	127488239	MACS_peak_893	50.17	DOWNSTREAM	NM_008921	chr10	+	127452270	127467086	127452304	127466841	13	127452270,127453019,127455031,127455203,127457185,127458728,127459918,127460638,127460836,127463573,127464108,127466241,127466821,	127452407,127453177,127455138,127455277,127457322,127458787,127460028,127460730,127460975,127463643,127464194,127466340,127467086,	0	Prim1	cmpl	cmpl	0,1,0,2,1,0,2,1,0,1,2,1,1,
chr10	127487727	127488239	MACS_peak_893	50.17	DOWNSTREAM	NM_001113199	chr10	+	127472401	127485693	127473546	127485563	9	127472401,127473544,127476226,127483223,127483784,127484713,127485054,127485300,127485548,	127472739,127473616,127482142,127483309,127483862,127484860,127485183,127485423,127485693,	0	Naca	cmpl	cmpl	-1,0,1,1,0,0,0,0,0,
chr10	127495251	127496016	MACS_peak_894	72.08	TSS	NM_019766	chr10	+	127496037	127514310	127496340	127513142	8	127496037,127505727,127506271,127507189,127509123,127511277,127512393,127513122,	127496342,127505841,127506341,127507288,127509213,127511340,127512418,127514310,	0	Ptges3	cmpl	cmpl	0,2,2,0,0,0,0,1,
chr10	127622974	127623503	MACS_peak_895	87.76	DOWNSTREAM	NM_025716	chr10	-	127646965	127648850	127647908	127648849	2	127646965,127648764,	127648447,127648850,	0	Spryd4	cmpl	cmpl	1,0,
chr10	127622974	127623503	MACS_peak_895	87.76	UPSTREAM	NM_001033264	chr10	+	127631690	127647060	127631781	127646500	18	127631690,127636237,127636692,127637228,127637941,127638261,127638614,127640878,127641130,127641716,127641916,127642143,127643927,127644353,127644616,127645646,127646161,127646343,	127631963,127636337,127636814,127637358,127638021,127638425,127638673,127640911,127641189,127641783,127641967,127642320,127644059,127644446,127644678,127645723,127646225,127647060,	0	Gls2	cmpl	cmpl	0,2,0,2,0,2,1,0,0,2,0,0,0,0,0,2,1,2,
chr10	127667180	127667703	MACS_peak_896	56.53	UPSTREAM	NM_133996	chr10	+	127691186	127692957	127691510	127692266	2	127691186,127691490,	127691337,127692957,	0	Apon	cmpl	cmpl	-1,0,
chr10	127667180	127667703	MACS_peak_896	56.53	TSS	NM_001164080	chr10	+	127669118	127689997	127676956	127689312	29	127669118,127676889,127677193,127677435,127677645,127678330,127678639,127679365,127679686,127680250,127681125,127681493,127681715,127683141,127683364,127684208,127684395,127684631,127685417,127686402,127686576,127686783,127687023,127687340,127687601,127687749,127688725,127689048,127689250,	127669231,127677053,127677347,127677550,127677708,127678432,127678795,127679499,127679774,127680427,127681343,127681597,127681885,127683267,127683516,127684306,127684513,127684833,127685563,127686488,127686697,127686866,127687166,127687518,127687670,127687868,127688939,127689144,127689997,	0	Timeless	cmpl	cmpl	-1,0,1,2,0,0,0,0,2,0,0,2,1,0,0,2,1,2,0,2,1,2,1,0,1,1,0,1,1,
chr10	127740603	127741179	MACS_peak_897	52.08	TSS	NM_133992	chr10	+	127740390	127758414	127741267	127757821	26	127740390,127741150,127745120,127745391,127745659,127746092,127747226,127747759,127749933,127750196,127750670,127750897,127751238,127751503,127751781,127751978,127752153,127752542,127752831,127753486,127754689,127754945,127755218,127756000,127757303,127757789,	127740527,127741549,127745290,127745512,127745737,127746360,127747569,127747856,127750050,127750316,127750799,127751097,127751372,127751610,127751880,127752049,127752292,127752713,127752891,127753577,127754847,127755089,127755398,127756094,127757501,127758414,	0	Pan2	cmpl	cmpl	-1,0,0,2,0,0,1,2,0,0,0,0,2,1,0,0,2,0,0,0,1,0,0,0,1,1,
chr10	127759004	127759727	MACS_peak_898	75.68	DOWNSTREAM	NM_133992	chr10	+	127740390	127758414	127741267	127757821	26	127740390,127741150,127745120,127745391,127745659,127746092,127747226,127747759,127749933,127750196,127750670,127750897,127751238,127751503,127751781,127751978,127752153,127752542,127752831,127753486,127754689,127754945,127755218,127756000,127757303,127757789,	127740527,127741549,127745290,127745512,127745737,127746360,127747569,127747856,127750050,127750316,127750799,127751097,127751372,127751610,127751880,127752049,127752292,127752713,127752891,127753577,127754847,127755089,127755398,127756094,127757501,127758414,	0	Pan2	cmpl	cmpl	-1,0,0,2,0,0,1,2,0,0,0,0,2,1,0,0,2,0,0,0,1,0,0,0,1,1,
chr10	127759004	127759727	MACS_peak_898	75.68	UPSTREAM	NM_026444	chr10	+	127774887	127799535	127774973	127798188	11	127774887,127786808,127787488,127788254,127789729,127790078,127795389,127796225,127796489,127796999,127798023,	127775015,127786859,127787596,127788320,127789861,127790267,127795589,127796355,127796591,127797209,127799535,	0	Cs	cmpl	cmpl	0,0,0,0,0,0,0,2,0,0,0,
chr10	127759004	127759727	MACS_peak_898	75.68	DOWNSTREAM	NM_001252327	chr10	+	127740390	127758414	127741267	127757821	26	127740390,127741150,127745174,127745391,127745659,127746092,127747226,127747759,127749933,127750196,127750670,127750897,127751238,127751503,127751781,127751978,127752153,127752569,127752831,127753486,127754689,127754945,127755218,127756000,127757303,127757789,	127740527,127741549,127745290,127745512,127745737,127746360,127747569,127747856,127750050,127750316,127750799,127751097,127751372,127751610,127751880,127752049,127752292,127752713,127752891,127753577,127754847,127755089,127755398,127756094,127757501,127758414,	0	Pan2	cmpl	cmpl	-1,0,0,2,0,0,1,2,0,0,0,0,2,1,0,0,2,0,0,0,1,0,0,0,1,1,
chr10	127759004	127759727	MACS_peak_898	75.68	DOWNSTREAM	NM_001252326	chr10	+	127740390	127758414	127741267	127757821	26	127740390,127741150,127745120,127745391,127745659,127746092,127747226,127747759,127749933,127750196,127750670,127750897,127751238,127751503,127751781,127751978,127752153,127752569,127752831,127753486,127754689,127754945,127755218,127756000,127757303,127757789,	127740527,127741549,127745290,127745512,127745737,127746360,127747569,127747856,127750050,127750316,127750799,127751097,127751372,127751610,127751880,127752049,127752292,127752713,127752891,127753577,127754847,127755089,127755398,127756094,127757501,127758414,	0	Pan2	cmpl	cmpl	-1,0,0,2,0,0,1,2,0,0,0,0,2,1,0,0,2,0,0,0,1,0,0,0,1,1,
chr10	127759004	127759727	MACS_peak_898	75.68	TSS	NM_019953	chr10	+	127759514	127764243	127760410	127764117	6	127759514,127760385,127760639,127763119,127763632,127764073,	127759831,127760498,127760755,127763323,127763729,127764243,	0	Cnpy2	cmpl	cmpl	-1,0,1,0,0,1,
chr10	127774653	127775325	MACS_peak_899	65.54	DOWNSTREAM	NM_001081040	chr10	-	127800152	127807093	127800679	127805893	5	127800152,127801460,127802078,127805062,127805753,	127800847,127801562,127802301,127805209,127807093,	0	Coq10a	cmpl	cmpl	0,0,2,2,0,
chr10	127774653	127775325	MACS_peak_899	65.54	DOWNSTREAM	NM_133992	chr10	+	127740390	127758414	127741267	127757821	26	127740390,127741150,127745120,127745391,127745659,127746092,127747226,127747759,127749933,127750196,127750670,127750897,127751238,127751503,127751781,127751978,127752153,127752542,127752831,127753486,127754689,127754945,127755218,127756000,127757303,127757789,	127740527,127741549,127745290,127745512,127745737,127746360,127747569,127747856,127750050,127750316,127750799,127751097,127751372,127751610,127751880,127752049,127752292,127752713,127752891,127753577,127754847,127755089,127755398,127756094,127757501,127758414,	0	Pan2	cmpl	cmpl	-1,0,0,2,0,0,1,2,0,0,0,0,2,1,0,0,2,0,0,0,1,0,0,0,1,1,
chr10	127774653	127775325	MACS_peak_899	65.54	TSS	NM_026444	chr10	+	127774887	127799535	127774973	127798188	11	127774887,127786808,127787488,127788254,127789729,127790078,127795389,127796225,127796489,127796999,127798023,	127775015,127786859,127787596,127788320,127789861,127790267,127795589,127796355,127796591,127797209,127799535,	0	Cs	cmpl	cmpl	0,0,0,0,0,0,0,2,0,0,0,
chr10	127984469	127985149	MACS_peak_900	51.12	DOWNSTREAM	NM_010153	chr10	-	128006423	128026557	128006423	128026557	28	128006423,128007109,128007991,128008225,128008501,128008700,128009184,128009489,128009814,128010230,128010467,128011394,128013037,128013916,128014259,128015155,128015449,128016057,128016551,128018819,128019045,128020172,128020421,128020692,128021366,128022067,128023195,128026475,	128006950,128007410,128008063,128008414,128008599,128008847,128009260,128009645,128010000,128010329,128010587,128011530,128013091,128014071,128014350,128015288,128015655,128016148,128016625,128018940,128019159,128020314,128020540,128020758,128021492,128022254,128023347,128026557,	0	Erbb3	cmpl	cmpl	1,0,0,0,1,1,0,0,0,0,0,2,2,0,2,1,2,1,2,1,1,0,1,1,1,0,1,0,
chr10	127984469	127985149	MACS_peak_900	51.12	DOWNSTREAM	NM_011119	chr10	-	127994821	128002990	127995961	128002883	12	127994821,127996117,127996285,127996493,127997137,127997714,127997974,127999882,128000121,128000279,128000632,128002795,	127996027,127996171,127996413,127996588,127997350,127997793,127998038,127999975,128000191,128000385,128000761,128002990,	0	Pa2g4	cmpl	cmpl	0,0,1,2,2,1,0,0,2,1,1,0,
chr10	127984469	127985149	MACS_peak_900	51.12	DOWNSTREAM	NM_018860	chr10	-	127985165	127986224	127985442	127986016	4	127985165,127985713,127986004,127986143,	127985485,127985736,127986029,127986224,	0	Rpl41	cmpl	cmpl	2,0,0,-1,
chr10	127984469	127985149	MACS_peak_900	51.12	TSS	NM_134003	chr10	-	127980620	127984800	127981234	127982542	3	127980620,127983883,127984749,	127982594,127983947,127984800,	0	Zc3h10	cmpl	cmpl	0,-1,-1,
chr10	127985794	127986645	MACS_peak_901	186.23	DOWNSTREAM	NM_010153	chr10	-	128006423	128026557	128006423	128026557	28	128006423,128007109,128007991,128008225,128008501,128008700,128009184,128009489,128009814,128010230,128010467,128011394,128013037,128013916,128014259,128015155,128015449,128016057,128016551,128018819,128019045,128020172,128020421,128020692,128021366,128022067,128023195,128026475,	128006950,128007410,128008063,128008414,128008599,128008847,128009260,128009645,128010000,128010329,128010587,128011530,128013091,128014071,128014350,128015288,128015655,128016148,128016625,128018940,128019159,128020314,128020540,128020758,128021492,128022254,128023347,128026557,	0	Erbb3	cmpl	cmpl	1,0,0,0,1,1,0,0,0,0,0,2,2,0,2,1,2,1,2,1,1,0,1,1,1,0,1,0,
chr10	127985794	127986645	MACS_peak_901	186.23	DOWNSTREAM	NM_011119	chr10	-	127994821	128002990	127995961	128002883	12	127994821,127996117,127996285,127996493,127997137,127997714,127997974,127999882,128000121,128000279,128000632,128002795,	127996027,127996171,127996413,127996588,127997350,127997793,127998038,127999975,128000191,128000385,128000761,128002990,	0	Pa2g4	cmpl	cmpl	0,0,1,2,2,1,0,0,2,1,1,0,
chr10	127985794	127986645	MACS_peak_901	186.23	TSS	NM_018860	chr10	-	127985165	127986224	127985442	127986016	4	127985165,127985713,127986004,127986143,	127985485,127985736,127986029,127986224,	0	Rpl41	cmpl	cmpl	2,0,0,-1,
chr10	127996813	127997212	MACS_peak_902	61.05	DOWNSTREAM	NM_010153	chr10	-	128006423	128026557	128006423	128026557	28	128006423,128007109,128007991,128008225,128008501,128008700,128009184,128009489,128009814,128010230,128010467,128011394,128013037,128013916,128014259,128015155,128015449,128016057,128016551,128018819,128019045,128020172,128020421,128020692,128021366,128022067,128023195,128026475,	128006950,128007410,128008063,128008414,128008599,128008847,128009260,128009645,128010000,128010329,128010587,128011530,128013091,128014071,128014350,128015288,128015655,128016148,128016625,128018940,128019159,128020314,128020540,128020758,128021492,128022254,128023347,128026557,	0	Erbb3	cmpl	cmpl	1,0,0,0,1,1,0,0,0,0,0,2,2,0,2,1,2,1,2,1,1,0,1,1,1,0,1,0,
chr10	128002844	128003716	MACS_peak_903	77.48	DOWNSTREAM	NM_010153	chr10	-	128006423	128026557	128006423	128026557	28	128006423,128007109,128007991,128008225,128008501,128008700,128009184,128009489,128009814,128010230,128010467,128011394,128013037,128013916,128014259,128015155,128015449,128016057,128016551,128018819,128019045,128020172,128020421,128020692,128021366,128022067,128023195,128026475,	128006950,128007410,128008063,128008414,128008599,128008847,128009260,128009645,128010000,128010329,128010587,128011530,128013091,128014071,128014350,128015288,128015655,128016148,128016625,128018940,128019159,128020314,128020540,128020758,128021492,128022254,128023347,128026557,	0	Erbb3	cmpl	cmpl	1,0,0,0,1,1,0,0,0,0,0,2,2,0,2,1,2,1,2,1,1,0,1,1,1,0,1,0,
chr10	128002844	128003716	MACS_peak_903	77.48	TSS	NM_011119	chr10	-	127994821	128002990	127995961	128002883	12	127994821,127996117,127996285,127996493,127997137,127997714,127997974,127999882,128000121,128000279,128000632,128002795,	127996027,127996171,127996413,127996588,127997350,127997793,127998038,127999975,128000191,128000385,128000761,128002990,	0	Pa2g4	cmpl	cmpl	0,0,1,2,2,1,0,0,2,1,1,0,
chr10	128111742	128112214	MACS_peak_904	53.66	TSS	NM_173733	chr10	-	128106942	128110974	128107572	128109647	4	128106942,128109159,128109594,128110907,	128108982,128109337,128109658,128110974,	0	Suox	cmpl	cmpl	0,2,0,-1,
chr10	128133131	128133663	MACS_peak_905	55.73	TSS	NM_177411	chr10	-	128114238	128133324	128116585	128123966	6	128114238,128118441,128119879,128120250,128123803,128133241,	128116701,128118535,128120002,128120402,128124064,128133324,	0	Rab5b	cmpl	cmpl	1,0,0,1,0,-1,
chr10	128179308	128180013	MACS_peak_906	55.98	TSS	NM_030100	chr10	+	128184934	128203624	128185017	128203146	3	128184934,128202202,128202665,	128185054,128202296,128203624,	0	Wibg	cmpl	cmpl	0,1,2,
chr10	128242322	128242872	MACS_peak_907	61.55	TSS	NM_028873	chr10	+	128242731	128256502	128243266	128254467	7	128242731,128243223,128251093,128251621,128253767,128254013,128254256,	128242770,128244676,128251200,128251741,128253928,128254116,128256502,	0	Dnajc14	cmpl	cmpl	-1,0,0,2,2,1,2,
chr10	128428918	128429529	MACS_peak_908	56.31	DOWNSTREAM	NM_146861	chr10	+	128426969	128427908	128426969	128427908	1	128426969,	128427908,	0	Olfr9	cmpl	cmpl	0,
chr10	128428918	128429529	MACS_peak_908	56.31	UPSTREAM	NM_146862	chr10	+	128448342	128449272	128448342	128449272	1	128448342,	128449272,	0	Olfr763	cmpl	cmpl	0,
chr11	3030554	3031176	MACS_peak_909	77.6	INTRAGENIC	NR_003517	chr11	+	3024023	3031947	3031947	3031947	7	3024023,3025790,3027481,3028931,3029384,3029767,3030155,	3024127,3026061,3027647,3029168,3029523,3029914,3031947,	0	Pisd-ps1	unk	unk	-1,-1,-1,-1,-1,-1,-1,
chr11	3030554	3031176	MACS_peak_909	77.6	DOWNSTREAM	NM_030207	chr11	-	3031852	3093466	3032029	3088966	33	3031852,3032218,3032889,3033074,3034320,3034628,3035285,3035656,3035945,3036627,3036948,3040139,3042310,3043262,3043697,3044219,3044794,3045243,3046164,3053434,3055401,3056774,3057868,3059987,3064559,3065578,3070589,3077429,3079399,3086067,3087242,3088943,3093362,	3032134,3032330,3032968,3033210,3034504,3034733,3035545,3035833,3036020,3036702,3037109,3040236,3042413,3043339,3043793,3044295,3044973,3045325,3046295,3053501,3055499,3056867,3057939,3060149,3064716,3065681,3070707,3077524,3079510,3086139,3087413,3089059,3093466,	0	Sfi1	cmpl	cmpl	0,2,1,0,2,2,0,0,0,0,1,0,2,0,0,2,0,2,0,2,0,0,1,1,0,2,1,2,2,2,2,0,-1,
chr11	3030554	3031176	MACS_peak_909	77.6	INTRAGENIC	NR_003518	chr11	+	3024029	3031945	3031945	3031945	7	3024029,3025790,3027481,3028931,3029384,3029767,3030155,	3024127,3026061,3027647,3029168,3029523,3029914,3031945,	0	Pisd-ps3	unk	unk	-1,-1,-1,-1,-1,-1,-1,
chr11	3031463	3034071	MACS_peak_910	359.16	INTRAGENIC	NR_003517	chr11	+	3024023	3031947	3031947	3031947	7	3024023,3025790,3027481,3028931,3029384,3029767,3030155,	3024127,3026061,3027647,3029168,3029523,3029914,3031947,	0	Pisd-ps1	unk	unk	-1,-1,-1,-1,-1,-1,-1,
chr11	3031463	3034071	MACS_peak_910	359.16	DOWNSTREAM	NM_030207	chr11	-	3031852	3093466	3032029	3088966	33	3031852,3032218,3032889,3033074,3034320,3034628,3035285,3035656,3035945,3036627,3036948,3040139,3042310,3043262,3043697,3044219,3044794,3045243,3046164,3053434,3055401,3056774,3057868,3059987,3064559,3065578,3070589,3077429,3079399,3086067,3087242,3088943,3093362,	3032134,3032330,3032968,3033210,3034504,3034733,3035545,3035833,3036020,3036702,3037109,3040236,3042413,3043339,3043793,3044295,3044973,3045325,3046295,3053501,3055499,3056867,3057939,3060149,3064716,3065681,3070707,3077524,3079510,3086139,3087413,3089059,3093466,	0	Sfi1	cmpl	cmpl	0,2,1,0,2,2,0,0,0,0,1,0,2,0,0,2,0,2,0,2,0,0,1,1,0,2,1,2,2,2,2,0,-1,
chr11	3031463	3034071	MACS_peak_910	359.16	INTRAGENIC	NR_003518	chr11	+	3024029	3031945	3031945	3031945	7	3024029,3025790,3027481,3028931,3029384,3029767,3030155,	3024127,3026061,3027647,3029168,3029523,3029914,3031945,	0	Pisd-ps3	unk	unk	-1,-1,-1,-1,-1,-1,-1,
chr11	3034285	3035947	MACS_peak_911	262.72	DOWNSTREAM	NR_003517	chr11	+	3024023	3031947	3031947	3031947	7	3024023,3025790,3027481,3028931,3029384,3029767,3030155,	3024127,3026061,3027647,3029168,3029523,3029914,3031947,	0	Pisd-ps1	unk	unk	-1,-1,-1,-1,-1,-1,-1,
chr11	3034285	3035947	MACS_peak_911	262.72	DOWNSTREAM	NR_003518	chr11	+	3024029	3031945	3031945	3031945	7	3024029,3025790,3027481,3028931,3029384,3029767,3030155,	3024127,3026061,3027647,3029168,3029523,3029914,3031945,	0	Pisd-ps3	unk	unk	-1,-1,-1,-1,-1,-1,-1,
chr11	3036492	3037973	MACS_peak_912	201.3	DOWNSTREAM	NR_003517	chr11	+	3024023	3031947	3031947	3031947	7	3024023,3025790,3027481,3028931,3029384,3029767,3030155,	3024127,3026061,3027647,3029168,3029523,3029914,3031947,	0	Pisd-ps1	unk	unk	-1,-1,-1,-1,-1,-1,-1,
chr11	3036492	3037973	MACS_peak_912	201.3	DOWNSTREAM	NR_003518	chr11	+	3024029	3031945	3031945	3031945	7	3024029,3025790,3027481,3028931,3029384,3029767,3030155,	3024127,3026061,3027647,3029168,3029523,3029914,3031945,	0	Pisd-ps3	unk	unk	-1,-1,-1,-1,-1,-1,-1,
chr11	3040808	3048740	MACS_peak_913	1735.25	DOWNSTREAM	NR_003517	chr11	+	3024023	3031947	3031947	3031947	7	3024023,3025790,3027481,3028931,3029384,3029767,3030155,	3024127,3026061,3027647,3029168,3029523,3029914,3031947,	0	Pisd-ps1	unk	unk	-1,-1,-1,-1,-1,-1,-1,
chr11	3040808	3048740	MACS_peak_913	1735.25	DOWNSTREAM	NR_003518	chr11	+	3024029	3031945	3031945	3031945	7	3024029,3025790,3027481,3028931,3029384,3029767,3030155,	3024127,3026061,3027647,3029168,3029523,3029914,3031945,	0	Pisd-ps3	unk	unk	-1,-1,-1,-1,-1,-1,-1,
chr11	3049545	3050372	MACS_peak_914	111.66	DOWNSTREAM	NR_003517	chr11	+	3024023	3031947	3031947	3031947	7	3024023,3025790,3027481,3028931,3029384,3029767,3030155,	3024127,3026061,3027647,3029168,3029523,3029914,3031947,	0	Pisd-ps1	unk	unk	-1,-1,-1,-1,-1,-1,-1,
chr11	3049545	3050372	MACS_peak_914	111.66	DOWNSTREAM	NR_003518	chr11	+	3024029	3031945	3031945	3031945	7	3024029,3025790,3027481,3028931,3029384,3029767,3030155,	3024127,3026061,3027647,3029168,3029523,3029914,3031945,	0	Pisd-ps3	unk	unk	-1,-1,-1,-1,-1,-1,-1,
chr11	3050566	3051817	MACS_peak_915	273.89	DOWNSTREAM	NR_003517	chr11	+	3024023	3031947	3031947	3031947	7	3024023,3025790,3027481,3028931,3029384,3029767,3030155,	3024127,3026061,3027647,3029168,3029523,3029914,3031947,	0	Pisd-ps1	unk	unk	-1,-1,-1,-1,-1,-1,-1,
chr11	3050566	3051817	MACS_peak_915	273.89	DOWNSTREAM	NR_003518	chr11	+	3024029	3031945	3031945	3031945	7	3024029,3025790,3027481,3028931,3029384,3029767,3030155,	3024127,3026061,3027647,3029168,3029523,3029914,3031945,	0	Pisd-ps3	unk	unk	-1,-1,-1,-1,-1,-1,-1,
chr11	3052118	3059018	MACS_peak_916	1749.88	DOWNSTREAM	NR_003517	chr11	+	3024023	3031947	3031947	3031947	7	3024023,3025790,3027481,3028931,3029384,3029767,3030155,	3024127,3026061,3027647,3029168,3029523,3029914,3031947,	0	Pisd-ps1	unk	unk	-1,-1,-1,-1,-1,-1,-1,
chr11	3052118	3059018	MACS_peak_916	1749.88	DOWNSTREAM	NR_003518	chr11	+	3024029	3031945	3031945	3031945	7	3024029,3025790,3027481,3028931,3029384,3029767,3030155,	3024127,3026061,3027647,3029168,3029523,3029914,3031945,	0	Pisd-ps3	unk	unk	-1,-1,-1,-1,-1,-1,-1,
chr11	3059330	3063957	MACS_peak_917	1131.33	NONE
chr11	3064242	3065172	MACS_peak_918	175.08	NONE
chr11	3065211	3070162	MACS_peak_919	1015.9	NONE
chr11	3070445	3071235	MACS_peak_920	158.65	NONE
chr11	3071279	3072759	MACS_peak_921	251.27	NONE
chr11	3072785	3074643	MACS_peak_922	340.93	NONE
chr11	3075660	3076987	MACS_peak_923	177.92	NONE
chr11	3077027	3078549	MACS_peak_924	343.9	UPSTREAM	NM_023743	chr11	+	3102585	3144591	3103660	3144092	19	3102585,3103632,3113262,3115594,3120246,3121095,3124634,3127397,3127708,3129871,3133990,3134464,3135583,3136216,3139403,3140897,3142379,3143185,3143853,	3102800,3103753,3113336,3115722,3120533,3121297,3124810,3127533,3127888,3130104,3134062,3134648,3135663,3136356,3139488,3141030,3142721,3143353,3144591,	0	Eif4enif1	cmpl	cmpl	-1,0,0,2,1,0,1,0,1,1,0,0,1,0,2,0,1,1,1,
chr11	3077027	3078549	MACS_peak_924	343.9	UPSTREAM	NM_001166549	chr11	+	3103021	3144591	3103660	3144092	18	3103021,3103632,3113262,3115594,3120246,3121095,3124634,3127397,3127708,3129871,3134464,3135583,3136216,3139403,3140897,3142379,3143185,3143853,	3103329,3103753,3113336,3115722,3120533,3121297,3124810,3127533,3127888,3130104,3134648,3135663,3136356,3139488,3141030,3142721,3143353,3144591,	0	Eif4enif1	cmpl	cmpl	-1,0,0,2,1,0,1,0,1,1,0,1,0,2,0,1,1,1,
chr11	3077027	3078549	MACS_peak_924	343.9	UPSTREAM	NM_001166548	chr11	+	3102355	3144591	3103660	3144092	18	3102355,3103632,3113262,3115594,3120246,3121095,3124634,3127397,3127708,3129871,3134464,3135583,3136216,3139403,3140897,3142379,3143185,3143853,	3102559,3103753,3113336,3115722,3120533,3121297,3124810,3127533,3127888,3130104,3134648,3135663,3136356,3139488,3141030,3142721,3143353,3144591,	0	Eif4enif1	cmpl	cmpl	-1,0,0,2,1,0,1,0,1,1,0,1,0,2,0,1,1,1,
chr11	3077027	3078549	MACS_peak_924	343.9	UPSTREAM	NM_001166547	chr11	+	3102997	3144591	3103660	3144092	19	3102997,3103632,3113262,3115594,3120246,3121095,3124634,3127397,3127708,3129871,3133990,3134464,3135583,3136216,3139403,3140897,3142379,3143185,3143853,	3103197,3103753,3113336,3115722,3120533,3121297,3124810,3127533,3127888,3130104,3134062,3134648,3135663,3136356,3139488,3141030,3142721,3143353,3144591,	0	Eif4enif1	cmpl	cmpl	-1,0,0,2,1,0,1,0,1,1,0,0,1,0,2,0,1,1,1,
chr11	3078560	3080115	MACS_peak_925	338.88	UPSTREAM	NM_023743	chr11	+	3102585	3144591	3103660	3144092	19	3102585,3103632,3113262,3115594,3120246,3121095,3124634,3127397,3127708,3129871,3133990,3134464,3135583,3136216,3139403,3140897,3142379,3143185,3143853,	3102800,3103753,3113336,3115722,3120533,3121297,3124810,3127533,3127888,3130104,3134062,3134648,3135663,3136356,3139488,3141030,3142721,3143353,3144591,	0	Eif4enif1	cmpl	cmpl	-1,0,0,2,1,0,1,0,1,1,0,0,1,0,2,0,1,1,1,
[truncated: 7,849 more rows]
