# Supplementary material for: p63 exerts spatio-temporal control of palatal epithelial cell fate to prevent cleft palate
Source: PLoS Genet. 2017 Jun 12;13(6):e1006828. doi: 10.1371/journal.pgen.1006828 (PMC5484519; doi:10.1371/journal.pgen.1006828)
Supplement: S4 Table — (XLSX) [file pgen.1006828.s016.xlsx]

## Sheet: Krt5-tTA;pTRE-∆Np63α array 
Transcript ID	gene_assignment	Gene Symbol	RefSeq	seqname	start	stop	strand	WT_138-01.CEL	WT_138-02.CEL	WT_138-07.CEL	WT_140-07.CEL	Mean(WT)	MUT_138-05.CEL	MUT_140-10.CEL	Mean(Grp1)	MUT_138-03.CEL	MUT_138-08.CEL	Mean(Grp2)	Ratio(Grp1 vs. WT)	Fold-Change(Grp1 vs. WT)	p.value.Grp1_vs_WT	q.value.Grp1_vs_WT
6906224	NM_212452 // Rxfp1 // relaxin/insulin-like family peptide receptor 1 // 3 E3|3 // 38148	Rxfp1	NM_212452	chr3	79448054	79541882	-	50.8065	48.0262	52.7855	46.0673	49.3545	128.692	125.575	127.125	58.4876	53.5098	55.9436	2.57574	2.57574	4.04168e-07	0.00308839
6748551	ENSMUST00000159747 // Arhgef4 // Rho guanine nucleotide exchange factor (GEF) 4 // 1 B|	Arhgef4	ENSMUST00000159747	chr1	34735043	34781084	+	140.608	125.202	129.762	143.961	134.664	343.151	389.414	365.551	144.927	105.727	123.785	2.71454	2.71454	1.05388e-05	0.0234797
6840223	NM_001127259 // Trp63 // transformation related protein 63 // 16 B1|16 19.3 cM // 22061	Trp63	NM_001127259	chr16	25683869	25892165	+	944.626	1006.14	931.118	1056.52	983.329	1872.44	2345.37	2095.53	1148.47	1196.16	1172.04	2.13112	2.13112	1.24926e-05	0.0234797
6820081	ENSMUST00000003561 // Phyhip // phytanoyl-CoA hydroxylase interacting protein // 14 D2|	Phyhip	ENSMUST00000003561	chr14	70854077	70868627	+	207.089	219.877	233.686	186.743	211.132	458.272	605.322	526.69	213.716	210.384	212.043	2.4946	2.4946	1.61229e-05	0.0234797
6870925	NM_010253 // Gal // galanin // 19 A|19 2.0 cM // 14419 /// ENSMUST00000025842 // Gal //	Gal	NM_010253	chr19	3409918	3414524	-	547.475	458.3	565.781	572.654	533.964	159.717	169.559	164.563	842.598	544.924	677.605	0.308192	-3.24473	2.00372e-05	0.0234797
6810682	NM_027416 // Calml3 // calmodulin-like 3 // 13 A1|13 // 70405 /// ENSMUST00000077698 //	Calml3	NM_027416	chr13	3802142	3803950	-	151.837	195.836	170.205	209.94	180.544	523.846	579.245	550.852	208.99	153.01	178.823	3.05105	3.05105	2.12375e-05	0.0234797
6945419	ENSMUST00000172278 // Chrm2 // cholinergic receptor, muscarinic 2, cardiac // 6 B1|6 //	Chrm2	ENSMUST00000172278	chr6	36322080	36498176	+	1106.89	988.235	1094.84	1074.17	1064.97	1783.75	1770.08	1776.97	1047.33	954.168	999.664	1.66847	1.66847	2.14834e-05	0.0234797
6910142	ENSMUST00000040465 // Clca5 // chloride channel calcium activated 5 // 3 H2|3 // 229933	Clca5	ENSMUST00000040465	chr3	144733229	144762382	-	129.668	140.035	119.859	139.838	132.081	244.468	307.964	274.385	123.081	127.172	125.111	2.0774	2.0774	2.46153e-05	0.023507
6808199	NM_018885 // Irx4 // Iroquois related homeobox 4 (Drosophila) // 13 C1|13 // 50916 ///	Irx4	NM_018885	chr13	73370843	73438579	+	134.63	129.224	130.762	128.327	130.714	232.717	313.156	269.958	155.66	138.575	146.869	2.06525	2.06525	4.10076e-05	0.0256432
6783810	NM_018885 // Irx4 // Iroquois related homeobox 4 (Drosophila) // 13 C1|13 // 50916 ///	Snf8	ENSMUST00000006217	chr11	95896219	95908727	+	268.18	240.892	309.499	315.265	281.771	143.983	133.032	138.399	304.159	292.289	298.164	0.491176	-2.03593	4.73267e-05	0.0256432
6752132	ENSMUST00000112730 // Serpinb5 // serine (or cysteine) peptidase inhibitor, clade B, me	Serpinb5	ENSMUST00000112730	chr1	108757652	108779925	+	647.048	731.878	606.419	739.235	678.785	1223.08	1186.75	1204.73	733.783	764.398	748.937	1.7749	1.7749	4.94796e-05	0.0256432
6838655	NM_027011 // Krt5 // keratin 5 // 15 F2|15 58.79 cM // 110308 /// ENSMUST00000023709 //	Krt5	NM_027011	chr15	101502817	101550757	-	4288.03	4908.95	4399.12	5108.56	4663.51	9066.31	8712.07	8887.73	6164.64	5067.29	5589.1	1.90567	1.90567	5.05087e-05	0.0256432
6813668	NM_028157 // Fam75d3 // family with sequence similarity 75, member D3 // 13 B2|13 // 72	Fam75d3	NM_028157	chr13	59801464	59807548	-	144.666	140.738	145.204	135.055	141.357	202.217	218.323	210.116	137.266	139.61	138.433	1.48642	1.48642	5.46694e-05	0.0256432
6818063	NM_020597 // Msmb // beta-microseminoprotein // 14 B|14 // 17695 /// ENSMUST00000022464	Msmb	NM_020597	chr14	32961262	32971560	+	25.4312	22.0227	24.7322	23.8297	23.9692	37.6814	39.335	38.4993	24.7798	27.1197	25.9233	1.60619	1.60619	5.93413e-05	0.0256432
6995736	NM_177769 // Elmod1 // ELMO domain containing 1 // 9 A5.3|9 // 270162 /// ENSMUST000001	Elmod1	NM_177769	chr9	53743685	53837334	-	135.209	101.169	119.236	135.471	121.921	273.152	352.258	310.195	124.484	96.8164	109.782	2.54423	2.54423	7.88357e-05	0.0256432
6946348	NM_030024 // Prr15 // proline rich 15 // 6 B3|6 // 78004 /// ENSMUST00000059138 // Prr1	Prr15	NM_030024	chr6	54262097	54292663	+	471.639	440.601	424.8	521.911	463.296	278.482	263.528	270.901	357.166	389.854	373.152	0.584726	-1.7102	8.12296e-05	0.0256432
6819752	NM_028525 // Prss52 // protease, serine, 52 // 14 D1|14 // 73382 /// ENSMUST00000022537	Prss52	NM_028525	chr14	64718537	64732570	+	83.6289	82.7117	87.4987	73.7484	81.7371	125.945	139.46	132.53	80.5929	77.6729	79.1194	1.62142	1.62142	8.44795e-05	0.0256432
6974783	NM_029965 // Rnf170 // ring finger protein 170 // 8|8 // 77733 /// ENSMUST00000014022 /	Rnf170	NM_029965	chr8	27229857	27268664	+	664.852	631.308	646.255	606.28	636.81	426.644	386.191	405.914	530.857	603.333	565.938	0.637416	-1.56883	9.23051e-05	0.0256432
6867643	NM_206973 // Gpr152 // G protein-coupled receptor 152 // 19 A|19 // 269053 /// ENSMUST0	Gpr152	NM_206973	chr19	4139765	4145719	+	114.006	108.67	122.713	116.896	115.46	165.669	174.229	169.895	111.021	114.812	112.901	1.47146	1.47146	0.000100354	0.0256432
6759642	NM_001005423 // Mreg // melanoregulin // 1 C3|1 // 381269 /// ENSMUST00000048860 // Mre	Mreg	NM_001005423	chr1	72170192	72258895	-	271.562	267.512	284.33	281.599	276.164	384.673	381.992	383.332	263.248	262.228	262.738	1.38806	1.38806	0.000101296	0.0256432
6764194	NM_011318 // Apcs // serum amyloid P-component // 1 H3|1 94.2 cM // 20219 /// ENSMUST00	Apcs	NM_011318	chr1	174824092	174855560	-	34.184	37.1521	37.0302	40.557	37.1626	62.0784	82.7903	71.69	39.4308	41.7942	40.5953	1.92909	1.92909	0.000103115	0.0256432
6762452	ENSMUST00000166193 // Igfn1 // immunoglobulin-like and fibronectin type III domain cont	Igfn1	ENSMUST00000166193	chr1	137825893	137890307	-	95.7188	95.6591	99.7504	91.9495	95.7294	136.849	137.532	137.19	102.299	94.5392	98.343	1.4331	1.4331	0.000103909	0.0256432
6807156	NM_001010973 // Hrh2 // histamine receptor H2 // 13 B1|13 32.0 cM // 15466 /// ENSMUST0	Hrh2	NM_001010973	chr13	54269774	54328741	+	99.1843	95.8622	110.061	109.92	103.562	177.619	181.975	179.784	111.743	137.139	123.792	1.736	1.736	0.000104773	0.0256432
6970073	NM_147049 // Olfr658 // olfactory receptor 658 // 7 E3|7 // 259051 /// ENSMUST000000892	Olfr658	NM_147049	chr7	111792913	111795828	-	32.3275	21.6565	30.4819	23.768	26.6869	61.1322	67.4885	64.2315	50.2158	49.3521	49.7823	2.40686	2.40686	0.000105708	0.0256432
6936889	ENSMUST00000002708 // Shh // sonic hedgehog // 5 B1|5 16.0 cM // 20423 /// NM_009170 //	Shh	ENSMUST00000002708	chr5	28783355	28849714	-	1201.15	1175.62	1090.14	1075.06	1134.23	717.726	744.3	730.89	1043.42	1190.37	1114.44	0.644405	-1.55182	0.000115457	0.0256432
6995161	NM_007648 // Cd3e // CD3 antigen, epsilon polypeptide // 9 A5.2|9 26.0 cM // 12501 ///	Cd3e	NM_007648	chr9	44805918	44835649	-	196.347	195.004	228.114	199.969	204.431	313.915	319.052	316.473	201.768	189.396	195.483	1.54807	1.54807	0.000121296	0.0256432
6932822	NR_045993 // 5830403M04Rik // RIKEN cDNA 5830403M04 gene // 5 E4|5 // 76003 /// NM_1828	5830403M04Rik	NR_045993	chr5	100506991	100524294	+	67.5995	71.2694	79.4872	74.65	73.1213	108.629	122.543	115.376	75.8501	72.5307	74.1719	1.57788	1.57788	0.000131694	0.0256432
6933917	NM_011537 // Tbx5 // T-box 5 // 5 F|5 65.0 cM // 21388 /// ENSMUST00000018407 // Tbx5 /	Tbx5	NM_011537	chr5	120174742	120371078	+	55.9719	52.6193	57.4789	54.5225	55.1187	79.5588	77.5347	78.5402	59.2807	54.9505	57.0743	1.42493	1.42493	0.00013406	0.0256432
6770955	NM_146242 // Lrrc10 // leucine rich repeat containing 10 // 10 D2|10 // 237560 /// ENSM	Lrrc10	NM_146242	chr10	116482407	116483820	+	84.4304	76.958	87.6171	81.1816	82.4519	122.006	117.303	119.632	77.6084	76.3513	76.9772	1.45093	1.45093	0.000138594	0.0256432
6828148	---	---	---	chr14	8623989	8625015	+	130.852	155.023	179.396	155.887	154.329	297.008	295.573	296.291	131.419	155.037	142.74	1.91985	1.91985	0.000139334	0.0256432
6962263	NM_146415 // Olfr291 // olfactory receptor 291 // 7 E1|7 // 258410 /// ENSMUST000000781	Olfr291	NM_146415	chr7	92004881	92005828	+	15.4355	18.903	17.573	17.2964	17.2569	27.3656	33.1878	30.1363	14.2434	15.3229	14.7733	1.74634	1.74634	0.000139616	0.0256432
6879087	NM_007699 // Chrm4 // cholinergic receptor, muscarinic 4 // 2 E1|2 49.0 cM // 12672 ///	Chrm4	NM_007699	chr2	91762366	91769982	+	238.737	228.194	257.208	250.606	243.431	395.546	354.677	374.554	253.586	229.736	241.366	1.53865	1.53865	0.000142916	0.0256432
6916784	ENSMUST00000030384 // Edn2 // endothelin 2 // 4 D2.2|4 // 13615 /// NM_007902 // Edn2 /	Edn2	ENSMUST00000030384	chr4	119833811	119865688	+	160.787	156.504	164.984	143.553	156.245	253.106	224.744	238.504	152.35	154.817	153.578	1.52647	1.52647	0.000145321	0.0256432
6878762	NM_207149 // Olfr1010 // olfactory receptor 1010 // 2 D|2 // 258255 /// NM_207149 // Ol	Olfr1010	NM_207149	chr2	85588529	85594463	+	61.4806	56.1102	63.2792	51.9679	58.0353	116.933	100.09	108.184	68.6763	55.7179	61.8585	1.8641	1.8641	0.000148478	0.0256432
6824838	NM_001161715 // Tgm1 // transglutaminase 1, K polypeptide // 14|14 C1 // 21816 /// ENSM	Tgm1	NM_001161715	chr14	56318870	56332901	-	237.89	253.654	269.713	259.43	254.909	420.22	591.56	498.583	256.923	232.151	244.222	1.95593	1.95593	0.000159976	0.0256432
6970307	NM_146732 // Olfr488 // olfactory receptor 488 // 7 E3|7 // 258727 /// ENSMUST000000729	Olfr488	NM_146732	chr7	115398706	115399650	-	59.1256	59.7559	53.9515	51.0203	55.844	89.882	114.668	101.521	53.7491	60.5531	57.0498	1.81795	1.81795	0.000160675	0.0256432
6990510	ENSMUST00000056006 // Onecut1 // one cut domain, family member 1 // 9 D|9 42.0 cM // 15	Onecut1	ENSMUST00000056006	chr9	74709728	74739588	+	256.494	280.238	271.44	259.151	266.66	387.317	367.021	377.034	256.327	243.803	249.985	1.41391	1.41391	0.000162311	0.0256432
6869517	NM_175353 // Exoc6 // exocyst complex component 6 // 19 C2|19 26.0 cM // 107371 /// ENS	Exoc6	NM_175353	chr19	37607844	37758524	+	441.843	419.952	434.843	441.874	434.535	324.373	313.054	318.664	381.18	399.018	389.997	0.733344	-1.36362	0.000168944	0.0256432
6969612	ENSMUST00000043077 // Thrsp // thyroid hormone responsive SPOT14 homolog (Rattus) // 7|	Thrsp	ENSMUST00000043077	chr7	104561298	104566109	-	92.0809	98.0265	105.874	93.5399	97.2354	144.516	148.04	146.267	106.436	96.0278	101.098	1.50426	1.50426	0.000169161	0.0256432
6791760	NM_011719 // Wnt9b // wingless-type MMTV integration site 9B // 11 E1|11 63.0 cM // 224	Wnt9b	NM_011719	chr11	103588677	103657077	-	154.693	143.64	160.814	139.765	149.492	235.372	213.999	224.431	147.264	147.325	147.295	1.5013	1.5013	0.000170942	0.0256432
6841363	NM_023881 // Retnlb // resistin like beta // 16 B5|16 33.0 cM // 57263 /// ENSMUST00000	Retnlb	NM_023881	chr16	48800883	48819267	+	79.0641	80.2812	67.7857	76.6806	75.7887	116.953	117.583	117.268	78.2723	71.1391	74.6205	1.5473	1.5473	0.000172035	0.0256432
6752994	NM_001170632 // Fcamr // Fc receptor, IgA, IgM, high affinity // 1|1 F // 64435 /// ENS	Fcamr	NM_001170632	chr1	132697479	132711317	+	95.2641	102.854	116.54	101.873	103.854	163.36	167.933	165.63	96.0065	107.409	101.548	1.59485	1.59485	0.000174139	0.0256432
6985007	NM_027960 // Dpep3 // dipeptidase 3 // 8 D3|8 // 71854 /// ENSMUST00000034371 // Dpep3	Dpep3	NM_027960	chr8	108494194	108503390	-	126.637	117.117	130.809	114.888	122.186	174.948	181.55	178.218	129.143	124.257	126.676	1.45858	1.45858	0.000176653	0.0256432
6849364	M57625 // Tpsb2 // tryptase beta 2 // 17 A3.3|17 10.39 cM // 17229 /// M57625 // Tpsb2	Tpsb2	M57625	chr17	25502328	25505673	+	119.997	112.786	114.646	112.686	114.991	153.86	170.746	162.083	112.423	112.869	112.646	1.40953	1.40953	0.000177489	0.0256432
6970045	NM_001146007 // Trim12c // tripartite motif-containing 12C // 7 E3|7 // 319236 /// NM_1	Trim12c	NM_001146007	chr7	111411898	111501866	-	179.44	134.759	159.376	208.437	168.352	72.5785	81.1793	76.7583	223.99	224.911	224.45	0.45594	-2.19327	0.000178587	0.0256432
6748886	NM_133193 // Il1rl2 // interleukin 1 receptor-like 2 // 1 B|1 // 107527 /// ENSMUST0000	Il1rl2	NM_133193	chr1	40381454	40447345	+	503.759	495.314	480.672	489.295	492.189	667.632	708.164	687.602	524.213	479.053	501.126	1.39703	1.39703	0.000181166	0.0256432
7009879	NM_031261 // Fthl17 // ferritin, heavy polypeptide-like 17 // X A1.1|X // 83457 /// ENS	Fthl17	NM_031261	chrX	8610611	8611457	+	21.1136	26.6211	19.8408	19.6582	21.6382	46.1516	38.7668	42.2984	25.8682	25.6152	25.7414	1.95479	1.95479	0.000183402	0.0256432
6791309	NM_172564 // Tns4 // tensin 4 // 11 D|11 // 217169 /// ENSMUST00000017751 // Tns4 // te	Tns4	NM_172564	chr11	98914983	98950614	-	197.8	189.067	205.939	205.344	199.419	334.959	435.603	381.979	230.255	179.362	203.222	1.91547	1.91547	0.000186303	0.0256432
6751616	NM_146277 // Olfr1412 // olfactory receptor 1412 // 1 D-E1|1 // 258274 /// ENSMUST00000	Olfr1412	NM_146277	chr1	94484843	94486082	+	96.3725	113.259	112.266	124.635	111.167	211.247	179.776	194.877	109.285	116.156	112.668	1.753	1.753	0.000187895	0.0256432
6884155	NM_148933 // Slco4a1 // solute carrier organic anion transporter family, member 4a1 //	Slco4a1	NM_148933	chr2	180127444	180209555	+	232.146	207.856	220.882	215.92	219.025	308.764	363.749	335.131	225.609	213.334	219.385	1.5301	1.5301	0.000188498	0.0256432
6884100	NM_026596 // 4930591A17Rik // RIKEN cDNA 4930591A17 gene // 2 H4|2 // 68175 /// ENSMUST	4930591A17Rik	NM_026596	chr2	179149641	179151587	+	55.7976	58.5298	67.8699	59.8865	60.36	92.661	97.1249	94.8667	74.8604	68.1901	71.4474	1.57168	1.57168	0.0001913	0.0256432
6871520	NM_023529 // Ms4a10 // membrane-spanning 4-domains, subfamily A, member 10 // 19|19 B /	Ms4a10	NM_023529	chr19	11036783	11049160	-	204.146	198.71	229.818	186.667	204.245	335.87	435.506	382.456	211.752	185.29	198.08	1.87253	1.87253	0.000192516	0.0256432
6803335	NM_009337 // Tcl1 // T cell lymphoma breakpoint 1 // 12 E|12 52.0 cM // 21432 /// ENSMU	Tcl1	NM_009337	chr12	106454963	106460924	-	106.771	107.812	128.474	114.263	114.014	188.232	171.238	179.534	114.944	109.578	112.229	1.57466	1.57466	0.000199619	0.0256432
6992378	ENSMUST00000026740 // Col7a1 // collagen, type VII, alpha 1 // 9 F2|9 61.0 cM // 12836	Col7a1	ENSMUST00000026740	chr9	108855304	108887484	+	565.534	574.399	573.802	581.603	573.806	771.986	880.427	824.422	594.734	552.565	573.262	1.43677	1.43677	0.000199736	0.0256432
6888586	NM_146461 // Olfr1209 // olfactory receptor 1209 // 2 E1|2 // 258453 /// ENSMUST0000009	Olfr1209	NM_146461	chr2	88749620	88755228	-	73.7806	95.7606	117.544	98.2489	95.0418	224.649	245.197	234.699	128.097	95.9546	110.867	2.46942	2.46942	0.000204933	0.0256432
6749034	NM_053107 // Gpr45 // G protein-coupled receptor 45 // 1|1 C1 // 93690	Gpr45	NM_053107	chr1	43009719	43092301	+	64.96	71.9189	83.2743	69.5409	72.1206	113.647	131.77	122.374	67.3054	66.6101	66.9569	1.69679	1.69679	0.000214716	0.0256432
6768261	NR_002687 // Gm5424 // argininosuccinate synthase pseudogene // 10 B4|10 // 432466 ///	Gm5424	NR_002687	chr10	61527742	61535350	+	1103.22	1137.78	1253.03	1220.03	1176.92	1863.5	1813.42	1838.36	1364.07	1141.01	1247.57	1.5619	1.5619	0.000216597	0.0256432
6885498	NM_030718 // Abo // ABO blood group (transferase A, alpha 1-3-N-acetylgalactosaminyltra	Abo	NM_030718	chr2	26698023	26720499	-	73.6381	72.2107	81.5939	75.8065	75.7298	108.483	117.811	113.051	77.192	68.6948	72.8194	1.49281	1.49281	0.00021943	0.0256432
6824004	NM_130878 // Cdhr1 // cadherin-related family member 1 // 14 B|14 // 170677 /// ENSMUST	Cdhr1	NM_130878	chr14	37887370	37911519	-	135.417	128.348	151.448	130.652	136.179	210.283	233.583	221.627	146.629	124.603	135.168	1.62747	1.62747	0.000220214	0.0256432
6927203	NM_011642 // Trp73 // transformation related protein 73 // 4 E2|4 82.0 cM // 22062 ///	Trp73	NM_011642	chr4	153430362	153514317	-	442.772	431.791	455.561	431.507	440.299	668.364	867.831	761.595	480.303	409.242	443.349	1.72972	1.72972	0.000220606	0.0256432
6925983	NM_145833 // Lin28a // lin-28 homolog A (C. elegans) // 4 D3|4 // 83557 /// ENSMUST0000	Lin28a	NM_145833	chr4	133559257	133574736	-	152.281	141.199	159.246	151.534	150.926	206.715	225.958	216.123	164.317	157.879	161.066	1.43198	1.43198	0.000222989	0.0256432
6761286	NM_201363 // Serpinb3c // serine (or cysteine) peptidase inhibitor, clade B, member 3C	Serpinb3c	NM_201363	chr1	109088051	109198931	-	35.0305	39.8125	34.3536	30.2602	34.6999	57.6425	69.9232	63.4866	39.82	35.4413	37.5669	1.82959	1.82959	0.000224799	0.0256432
6771581	NM_001199971 // Tac2 // tachykinin 2 // 10 D3|10 // 21334 /// NM_009312 // Tac2 // tach	Tac2	NM_001199971	chr10	127161534	127168824	+	88.7429	95.3156	102.7	83.0633	92.1658	155.833	226.51	187.878	91.6384	89.7637	90.6962	2.03847	2.03847	0.000232883	0.0256432
6856203	NM_029796 // Lrg1 // leucine-rich alpha-2-glycoprotein 1 // 17 D|17 10.0 cM // 76905 //	Lrg1	NM_029796	chr17	56258727	56261492	-	152.88	156.84	166.693	161.176	159.315	214.876	219.388	217.12	150.599	143.914	147.219	1.36284	1.36284	0.000234854	0.0256432
6787293	---	---	---					635.241	707.767	685.551	622.31	661.79	962.692	954.751	958.71	747.796	689.98	718.309	1.44867	1.44867	0.000235019	0.0256432
7007282	NM_207648 // H2-Q6 // histocompatibility 2, Q region locus 6 // 17 B1|17 19.18 cM // 11	H2-Q6	NM_207648	chr10	63200809	63200896	-	294.558	327.829	301.251	393.426	327.08	566.967	570.61	568.785	374.474	375.638	375.055	1.73898	1.73898	0.000239485	0.0256432
6963089	ENSMUST00000106893 // Olfr592 // olfactory receptor 592 // 7 E3|7 // 404317 /// NM_2075	Olfr592	ENSMUST00000106893	chr7	110334322	110336051	+	18.1563	21.9123	17.3843	17.7615	18.7213	29.6761	33.4276	31.4961	22.0418	20.3763	21.1928	1.68236	1.68236	0.000240791	0.0256432
6775283	NM_207571 // Olfr1355 // olfactory receptor 1355 // 10 C1|10 // 257734 /// NM_146308 //	Olfr1355	NM_207571	chr10	78309517	78342164	-	74.9377	82.3468	94.7143	83.1936	83.505	131.711	139.964	135.775	110.543	98.2367	104.209	1.62594	1.62594	0.000241433	0.0256432
6837023	NM_009218 // Sstr3 // somatostatin receptor 3 // 15 E1|15 46.3 cM // 20607 /// ENSMUST0	Sstr3	NM_009218	chr15	78362621	78375095	-	167.693	177.333	195.961	163.712	175.747	258.643	268.603	263.577	166.253	158.553	162.357	1.49974	1.49974	0.000248258	0.0256432
6757975	ENSMUST00000151952 // Mgat4a // mannoside acetylglucosaminyltransferase 4, isoenzyme A	Mgat4a	ENSMUST00000151952	chr1	37496234	37609425	-	581.72	581.788	559.487	601.358	580.898	431.417	368.98	398.979	569.93	597.245	583.428	0.686831	-1.45596	0.000250389	0.0256432
6973682	BC050809 // 1700019B03Rik // RIKEN cDNA 1700019B03 gene // 8 A1.1|8 // 76406 /// BC0508	1700019B03Rik	BC050809	chr8	3470851	3487178	+	74.9351	79.8511	84.6706	76.0101	78.7758	113.889	118.058	115.954	83.4419	73.4989	78.3125	1.47196	1.47196	0.000252108	0.0256432
6993756	NM_053190 // S1pr5 // sphingosine-1-phosphate receptor 5 // 9|9 A4 // 94226 /// ENSMUST	S1pr5	NM_053190	chr9	21047361	21054461	-	219.218	257.947	236.627	259.198	242.675	362.586	450.736	404.266	238.716	237.072	237.893	1.66587	1.66587	0.000252154	0.0256432
6854271	NM_028416 // Kremen2 // kringle containing transmembrane protein 2 // 17 A3.3|17 // 730	Kremen2	NM_028416	chr17	23878166	23882800	-	614.871	605.432	693.893	632.328	635.73	910.427	1114.59	1007.35	617.69	633.394	625.493	1.58456	1.58456	0.000254193	0.0256432
6979675	NM_170684 // Cpne7 // copine VII // 8 E1|8 // 102278 /// ENSMUST00000037900 // Cpne7 //	Cpne7	NM_170684	chr8	125641298	125659083	+	198.27	224.894	219.04	192.391	208.202	319.194	328.395	323.762	235.183	272.273	253.048	1.55504	1.55504	0.000256273	0.0256432
6854923	NM_177719 // Morc2b // microrchidia 2B // 17 B1|17 // 240069 /// ENSMUST00000053896 //	Morc2b	NM_177719	chr17	33272535	33276618	-	88.2081	82.8179	88.7405	91.8183	87.836	140.727	130.411	135.471	100.206	82.7737	91.0742	1.54232	1.54232	0.000257303	0.0256432
6963163	NM_007887 // Dub1 // deubiquitinating enzyme 1 // 7 E3|7 51.5 cM // 13531 /// ENSMUST00	Dub1	NM_007887	chr7	112003381	112029222	+	22.4627	26.4723	21.749	21.6391	23.0003	35.6688	41.7536	38.5915	30.0368	27.0609	28.5101	1.67787	1.67787	0.00026071	0.0256432
6811610	NM_134235 // Vmn1r210 // vomeronasal 1 receptor 210 // 13 A3.1|13 // 171269 /// ENSMUST	Vmn1r210	NM_134235	chr13	22919063	22919983	-	110.367	53.6765	38.7636	52.8313	59.0179	10.5246	11.7057	11.0994	43.2159	35.1358	38.967	0.188069	-5.3172	0.000261054	0.0256432
6788822	NM_026183 // Slc47a1 // solute carrier family 47, member 1 // 11 B2|11 // 67473 /// ENS	Slc47a1	NM_026183	chr11	61156647	61191827	-	102.265	110.511	118.754	107.016	109.473	153.419	171.251	162.09	114.883	108.676	111.736	1.48064	1.48064	0.000265466	0.0256432
6762147	ENSMUST00000027688 // Rassf5 // Ras association (RalGDS/AF-6) domain family member 5 //	Rassf5	ENSMUST00000027688	chr1	133072991	133144761	-	258.298	249.892	262.863	257.697	257.145	356.434	342.493	349.394	252.666	231.921	242.072	1.35874	1.35874	0.000266098	0.0256432
6769224	ENSMUST00000051773 // Onecut3 // one cut domain, family member 3 // 10 C1|10 // 246086	Onecut3	ENSMUST00000051773	chr10	79909104	79980011	+	261.617	292.094	282.362	254.962	272.343	388.185	391.984	390.081	289.612	273.425	281.402	1.43231	1.43231	0.000268356	0.0256432
6783736	NM_053093 // Tac4 // tachykinin 4 // 11 D|11 // 93670 /// ENSMUST00000021242 // Tac4 //	Tac4	NM_053093	chr11	95122843	95133574	+	115.976	132.665	125.388	124.346	124.452	183.113	170.047	176.459	112.889	118.113	115.471	1.41789	1.41789	0.000288582	0.0272355
6834025	NM_008728 // Npr3 // natriuretic peptide receptor 3 // 15 A1|15 6.7 cM // 18162 /// NM_	Npr3	NM_008728	chr15	11773678	11837106	-	1114.13	1147.99	1190.21	1236.2	1171.22	1765.43	1787.59	1776.47	1542.23	1266.56	1397.66	1.51674	1.51674	0.000302191	0.0277761
6842983	NM_183189 // Krtap13-1 // keratin associated protein 13-1 // 16 C3.3|16 // 268905 /// E	Krtap13-1	NM_183189	chr16	88707832	88729854	+	90.0647	73.3625	83.1382	84.612	82.5685	129.819	135.706	132.73	94.0757	79.1671	86.3001	1.60751	1.60751	0.000305972	0.0277761
6781300	NM_138678 // Btnl10 // butyrophilin-like 10 // 11 B1.3|11 // 192194 /// ENSMUST00000020	Btnl10	NM_138678	chr11	58728135	58740646	+	138.785	142.769	145.993	138.053	141.364	185.864	188.449	187.151	151.437	144.778	148.069	1.3239	1.3239	0.000306938	0.0277761
6828547	NM_010275 // Gdnf // glial cell line derived neurotrophic factor // 15 A1|15 // 14573 /	Gdnf	NM_010275	chr15	7753357	7796653	+	223.15	220.83	245.468	198.51	221.364	322.338	353.224	337.429	221.716	222.591	222.153	1.52431	1.52431	0.000308844	0.0277761
6953100	ENSMUST00000031901 // Trpv5 // transient receptor potential cation channel, subfamily V	Trpv5	ENSMUST00000031901	chr6	41599371	41630874	-	73.9127	78.185	76.0296	73.0818	75.2766	101.697	97.8012	99.7303	75.0869	75.3769	75.2318	1.32485	1.32485	0.000321386	0.0283704
6870622	NM_007419 // Adrb1 // adrenergic receptor, beta 1 // 19 D2|19 51.0 cM // 11554 /// ENSM	Adrb1	NM_007419	chr19	56766585	56814068	+	260.195	250.655	234.439	268.722	253.178	357.651	349.198	353.4	272.322	282.871	277.547	1.39585	1.39585	0.000322874	0.0283704
6921195	NM_019475 // Olfr157 // olfactory receptor 157 // 4 B1|4 // 100040268 /// ENSMUST000000	Olfr157	NM_019475	chr4	43847634	43849360	-	64.6895	51.0759	62.0212	52.7698	57.3448	93.4278	111.043	101.855	64.8975	74.3541	69.4653	1.7762	1.7762	0.000333584	0.0285678
6984473	NM_026385 // Pllp // plasma membrane proteolipid // 8 C5|8 // 67801 /// ENSMUST00000034	Pllp	NM_026385	chr8	97198795	97220273	-	176.951	200.495	203.02	173.722	188.078	278.241	287.015	282.593	215.582	195.8	205.452	1.50253	1.50253	0.000336582	0.0285678
6814206	NM_172053 // Adamts16 // a disintegrin-like and metallopeptidase (reprolysin type) with	Adamts16	NM_172053	chr13	70839596	70980679	-	474.525	469.467	391.772	530.971	463.971	259.106	288.239	273.285	514.191	498.358	506.213	0.58901	-1.69776	0.000343785	0.0285678
6952139	NM_198251 // Rnf133 // ring finger protein 133 // 6 A3.1|6 // 386611 /// ENSMUST0000006	Rnf133	NM_198251	chr6	23598774	23600305	-	64.4536	62.2344	61.279	61.3699	62.3216	80.4054	85.4276	82.8782	69.7127	66.618	68.148	1.32986	1.32986	0.000347198	0.0285678
6959461	ENSMUST00000081457 // Lgals7 // lectin, galactose binding, soluble 7 // 7 A3|7 // 16858	Lgals7	ENSMUST00000081457	chr7	29647109	29651676	+	558.514	493.932	543.275	494.631	521.795	784.299	715.64	749.186	539.044	558.599	548.737	1.43578	1.43578	0.000352069	0.0285678
6952451	NM_017478 // Copg2 // coatomer protein complex, subunit gamma 2 // 6 A3.3|6 // 54160 //	Copg2	NM_017478	chr6	30759559	30929319	-	155.094	137.394	116.602	164.775	142.246	81.2283	75.5626	78.3445	110.784	115.254	112.997	0.550767	-1.81565	0.000355231	0.0285678
6960347	NM_053256 // Pth2 // parathyroid hormone 2 // 7 B4|7 // 114640 /// ENSMUST00000042754 /	Pth2	NM_053256	chr7	52436375	52437208	+	270.67	276.284	313.098	299.219	289.312	429.978	448.477	439.132	342.559	291.265	315.873	1.51784	1.51784	0.000358325	0.0285678
6844216	ENSMUST00000057886 // Olfr19 // olfactory receptor 19 // 16 B1|16 // 18316 /// NM_14633	Olfr19	ENSMUST00000057886	chr16	16672989	16674144	-	36.973	35.6856	42.7493	34.0624	37.2302	58.3043	62.942	60.5788	39.7764	34.0778	36.817	1.62714	1.62714	0.000358747	0.0285678
6849070	NM_009558 // Zfp51 // zinc finger protein 51 // 17 A3.2|17 9.9 cM // 22709 /// ENSMUST0	Zfp51	NM_009558	chr17	21587331	21602555	+	439.047	501.637	428.06	491.436	463.945	317.561	267.785	291.613	408.916	452.276	430.05	0.628548	-1.59097	0.000362155	0.0285678
6878816	NM_146297 // Olfr1115 // olfactory receptor 1115 // 2 E1|2 // 258294 /// ENSMUST0000008	Olfr1115	NM_146297	chr2	87088199	87093072	+	25.3487	30.4065	25.0742	28.9462	27.3487	41.978	44.3616	43.1533	29.5755	26.1943	27.8337	1.5779	1.5779	0.000362491	0.0285678
6788662	NM_009522 // Wnt3a // wingless-related MMTV integration site 3A // 11 B1.3|11 32.0 cM /	Wnt3a	NM_009522	chr11	59061546	59104254	-	254.17	262.721	289.245	232.277	258.805	389.676	392.884	391.275	247.268	228.828	237.87	1.51186	1.51186	0.000371436	0.0286997
6873363	NM_001166361 // Fgf8 // fibroblast growth factor 8 // 19 C3-D|19 45.0 cM // 14179 /// E	Fgf8	NM_001166361	chr19	45811289	45817385	-	161.082	166.427	189.747	160.632	169.072	251.186	249.952	250.568	180.043	162.486	171.039	1.48203	1.48203	0.000378054	0.0286997
6825705	NM_011359 // Sftpc // surfactant associated protein C // 14 D2|14 32.5 cM // 20389 ///	Sftpc	NM_011359	chr14	70920760	70924018	-	85.8949	88.5383	101.16	83.8698	89.625	132.565	135.096	133.825	79.9535	87.7094	83.742	1.49317	1.49317	0.000382926	0.0286997
6778383	ENSMUST00000020699 // Gatsl3 // GATS protein-like 3 // 11 A1|11 // 71962 /// NM_028022	Gatsl3	ENSMUST00000020699	chr11	4118243	4122386	+	372.837	325.553	361.404	348.117	351.531	495.177	541.478	517.81	328.348	288.003	307.514	1.47301	1.47301	0.000384976	0.0286997
6968875	NM_007562 // Bnc1 // basonuclin 1 // 7 D3|7 // 12173 /// ENSMUST00000026096 // Bnc1 //	Bnc1	NM_007562	chr7	89111558	89137176	-	362.019	365.407	404.824	344.393	368.518	515.211	585.77	549.357	350.296	380.367	365.022	1.49073	1.49073	0.000391273	0.0286997
6946835	---	---	---					105.805	116.172	116.827	117.264	113.915	170.693	151.179	160.639	110.319	108.203	109.256	1.41018	1.41018	0.000394193	0.0286997
6824001	NM_021340 // Rgr // retinal G protein coupled receptor // 14 B|14 // 57811 /// ENSMUST0	Rgr	NM_021340	chr14	37819575	37862180	-	77.941	77.0402	77.5094	76.9287	77.3538	98.2837	100.427	99.3494	80.5727	78.832	79.6979	1.28436	1.28436	0.000397009	0.0286997
6828480	NM_011815 // Fyb // FYN binding protein // 15 A1|15 // 23880 /// ENSMUST00000090461 //	Fyb	NM_011815	chr15	6472873	6614982	+	324.038	301.426	312.84	312.721	312.653	234.638	239.943	237.276	333.659	350.497	341.976	0.758908	-1.31768	0.000397787	0.0286997
6753189	ENSMUST00000007433 // Kiss1 // KiSS-1 metastasis-suppressor // 1 E4|1 // 280287 /// NM_	Kiss1	ENSMUST00000007433	chr1	135206322	135226478	+	191.762	194.119	213.785	196.63	198.89	274.73	263.729	269.173	191.707	191.337	191.521	1.35337	1.35337	0.000399025	0.0286997
6775508	NM_001255990 // Gm1553 // predicted gene 1553 // 10 C1|10 // 432480 /// NM_001255990 //	Gm1553	NM_001255990	chr10	81905956	81991321	-	37.5156	38.0198	36.2319	36.1534	36.9715	47.2804	52.0588	49.6121	37.5333	38.5153	38.0211	1.3419	1.3419	0.000403665	0.0286997
6952926	NM_172893 // Parp12 // poly (ADP-ribose) polymerase family, member 12 // 6 B1|6 // 2437	Parp12	NM_172893	chr6	39035446	39068953	-	723.154	671.652	675.888	708.095	694.36	535.714	511.996	523.723	678.126	664.507	671.28	0.754249	-1.32582	0.000405669	0.0286997
6766584	NM_001008499 // Taar4 // trace amine-associated receptor 4 // 10 A4|10 // 209513 /// EN	Taar4	NM_001008499	chr10	23680247	23681343	+	52.7069	50.3755	50.2865	49.251	50.6395	65.1462	73.8159	69.346	48.3519	48.9155	48.6329	1.3694	1.3694	0.000415514	0.0286997
7005596	NM_027306 // Zdhhc25 // zinc finger, DHHC domain containing 25 // 15 E3|15 // 70073 ///	Zdhhc25	NM_027306	chr12	21848029	21848169	-	68.3022	55.2089	57.4861	55.2269	58.8218	87.0215	97.6921	92.2022	73.4805	73.8999	73.6896	1.56749	1.56749	0.000418975	0.0286997
6775891	NM_025914 // Actr6 // ARP6 actin-related protein 6 // 10 C2|10 // 67019 /// ENSMUST0000	Actr6	NM_025914	chr10	89174651	89195040	-	573.946	620.368	593.305	648.004	608.267	393.263	421.994	407.377	545.105	652.403	596.348	0.669732	-1.49314	0.000429451	0.0286997
6980090	NM_029465 // Clec4g // C-type lectin domain family 4, member g // 8 A1.1|8 // 75863 ///	Clec4g	NM_029465	chr8	3707074	3720645	-	86.919	95.1354	93.5185	86.4036	90.4112	127.184	119.049	123.049	93.268	94.7195	93.991	1.361	1.361	0.000432943	0.0286997
6873065	NM_145499 // Cyp2c70 // cytochrome P450, family 2, subfamily c, polypeptide 70 // 19 C3	Cyp2c70	NM_145499	chr19	40220977	40261803	-	36.3817	42.1915	37.3234	36.5508	38.0404	53.6	53.3572	53.4786	45.0573	43.3635	44.2023	1.40583	1.40583	0.000440635	0.0286997
7010086	ENSMUST00000050434 // Nyx // nyctalopin // X A1.1|X 4.51 cM // 236690 /// AY114303 // N	Nyx	ENSMUST00000050434	chrX	12999720	13073747	+	120.664	117	116.843	115.741	117.547	152.014	150.07	151.039	114.001	111.814	112.902	1.28491	1.28491	0.000445863	0.0286997
6748553	NM_183019 // Arhgef4 // Rho guanine nucleotide exchange factor (GEF) 4 // 1 B|1 // 2269	Arhgef4	NM_183019	chr1	34788954	34873560	+	417.867	428.767	431.95	411.15	422.351	549.098	597.689	572.88	421.515	384.655	402.663	1.3564	1.3564	0.000446969	0.0286997
6813752	ENSMUST00000021888 // Ctsq // cathepsin Q // 13 B3|13 35.0 cM // 104002 /// NM_029636 /	Ctsq	ENSMUST00000021888	chr13	61136404	61141976	-	20.9983	19.0824	22.6009	22.5029	21.2469	29.7222	32.5122	31.0859	22.7559	23.4709	23.1107	1.46308	1.46308	0.000447148	0.0286997
6946054	NM_172888 // Svs1 // seminal vesicle secretory protein 1 // 6 B2.3|6 // 243377 /// ENSM	Svs1	NM_172888	chr6	48931100	48985821	+	99.949	87.245	99.016	86.4911	92.9608	129.858	139.453	134.57	99.0146	100.961	99.9836	1.4476	1.4476	0.000448686	0.0286997
6803210	NM_029803 // Ifi27l2a // interferon, alpha-inducible protein 27 like 2A // 12 E|12 // 7	Ifi27l2a	NM_029803	chr12	104672093	104681953	-	97.573	107.628	113.66	104.15	105.592	147.468	180.453	163.129	106.102	114.211	110.082	1.5449	1.5449	0.000449008	0.0286997
6878510	NM_177256 // Prdx6b // peroxiredoxin 6B // 2 C3|2 47.5 cM // 320769 /// ENSMUST00000057	Prdx6b	NM_177256	chr2	80132632	80135513	+	51.6759	52.2207	64.9983	46.0446	53.3095	88.8026	98.5333	93.5412	65.8194	61.8066	63.7812	1.75469	1.75469	0.00045008	0.0286997
6947585	ENSMUST00000032070 // Figla // folliculogenesis specific basic helix-loop-helix // 6 C3	Figla	ENSMUST00000032070	chr6	85967185	85970990	+	82.3211	83.0104	86.6255	77.5879	82.3234	107.32	115.798	111.479	89.258	86.9546	88.0988	1.35416	1.35416	0.000465499	0.0286997
6789517	ENSMUST00000048207 // Aipl1 // aryl hydrocarbon receptor-interacting protein-like 1 //	Aipl1	ENSMUST00000048207	chr11	71839342	71851001	-	182.42	184.361	179.226	167.869	178.353	238.056	281.802	259.007	176.88	190.531	183.579	1.45223	1.45223	0.000465956	0.0286997
6964075	ENSMUST00000033035 // Slc5a11 // solute carrier family 5 (sodium/glucose cotransporter)	Slc5a11	ENSMUST00000033035	chr7	130358314	130416767	+	109.669	114.692	118.726	111.906	113.698	147.163	162.891	154.828	105.384	111.765	108.528	1.36174	1.36174	0.000468308	0.0286997
6876475	NM_146662 // Olfr365 // olfactory receptor 365 // 2 C1|2 // 258656 /// ENSMUST000000741	Olfr365	NM_146662	chr2	37056763	37063649	+	17.1017	23.3168	21.218	21.2264	20.5861	46.2157	39.8553	42.918	22.8939	33.3367	27.6263	2.0848	2.0848	0.000485115	0.0286997
7018507	NM_020621 // P2ry4 // pyrimidinergic receptor P2Y, G-protein coupled, 4 // X|X C2 // 57	P2ry4	NM_020621	chrX	97785493	97790208	-	64.561	58.1602	65.3443	57.6281	61.321	88.1201	84.3461	86.2128	62.2447	66.4589	64.3171	1.40592	1.40592	0.000487253	0.0286997
6946055	NM_053110 // Gpnmb // glycoprotein (transmembrane) nmb // 6 B2.3|6 21.0 cM // 93695 ///	Gpnmb	NM_053110	chr6	48986529	49020918	+	107.098	107.071	112.307	111.194	109.392	138.421	149.717	143.958	111.796	108.557	110.165	1.31598	1.31598	0.000499322	0.0286997
6809876	BC119576 // 4933425L06Rik // RIKEN cDNA 4933425L06 gene // 13 D1|13 // 66763 /// BC1195	4933425L06Rik	BC119576	chr13	105872202	105983894	+	32.878	35.6586	34.9386	34.2815	34.4237	47.9833	44.4672	46.1916	34.6874	32.5742	33.6142	1.34186	1.34186	0.000499397	0.0286997
6980100	ENSMUST00000033888 // Cd209e // CD209e antigen // 8 A1.1|8 // 170780 /// NM_130905 // C	Cd209e	ENSMUST00000033888	chr8	3847973	3854357	-	109.922	110.271	98.034	99.796	104.354	156.854	139.709	148.034	102.168	100.794	101.478	1.41857	1.41857	0.000499521	0.0286997
6970350	NM_057173 // Lmo1 // LIM domain only 1 // 7 E3|7 51.5 cM // 109594 /// ENSMUST000000369	Lmo1	NM_057173	chr7	116256785	116318701	-	184.136	181.925	189.068	189.961	186.243	239.613	275.626	256.99	202.521	189.586	195.947	1.37987	1.37987	0.00050065	0.0286997
6814347	NM_001040692 // Slc6a18 // solute carrier family 6 (neurotransmitter transporter), memb	Slc6a18	NM_001040692	chr13	73799210	73815468	-	64.2494	67.0632	76.3126	70.807	69.4633	96.5022	98.9474	97.7172	75.8438	75.0458	75.4438	1.40674	1.40674	0.000503464	0.0286997
6992468	ENSMUST00000077549 // Prss43 // protease, serine, 43 // 9 F3|9 // 272643 /// ENSMUST000	Prss43	ENSMUST00000077549	chr9	110729194	110734343	+	150.671	140.177	158.289	126.752	143.475	208.556	221.702	215.028	133.919	137.921	135.905	1.49871	1.49871	0.000508718	0.0286997
6762448	ENSMUST00000027667 // Pkp1 // plakophilin 1 // 1 E4|1 // 18772 /// NM_019645 // Pkp1 //	Pkp1	ENSMUST00000027667	chr1	137767972	137815881	-	1056.74	1346.78	1066.97	1231.84	1169.52	1976.46	2183.76	2077.45	1582.62	1235.43	1398.34	1.77645	1.77645	0.000509646	0.0286997
6768333	ENSMUST00000020266 // Pbld1 // phenazine biosynthesis-like protein domain containing 1	Pbld1	ENSMUST00000020266	chr10	62522930	62540690	+	141.051	128.473	134.383	128.23	132.932	173.063	186.963	179.879	124.378	118.77	121.542	1.35316	1.35316	0.000516944	0.0286997
6838652	NM_001003670 // Gm5414 // predicted gene 5414 // 15 F2|15 // 406223 /// ENSMUST00000062	Gm5414	NM_001003670	chr15	101452115	101458619	-	53.9735	58.4257	50.5203	50.3141	53.2091	76.5314	77.7726	77.1492	55.3684	48.6369	51.8934	1.44993	1.44993	0.000518749	0.0286997
6823892	NM_001128599 // Opn4 // opsin 4 (melanopsin) // 14 B|14 // 30044 /// ENSMUST00000168444	Opn4	NM_001128599	chr14	35403395	35428463	-	157.353	168.336	181.82	155.151	165.334	234.34	231.167	232.747	169.982	160.763	165.308	1.40774	1.40774	0.000525429	0.0286997
6786473	NM_018861 // Slc1a4 // solute carrier family 1 (glutamate/neutral amino acid transporte	Slc1a4	NM_018861	chr11	20190054	20232722	-	887.929	842.504	844.065	828.295	850.407	1086.9	1133.92	1110.2	913.183	874.703	893.733	1.30544	1.30544	0.000527972	0.0286997
6753079	ENSMUST00000049027 // Slc26a9 // solute carrier family 26, member 9 // 1 E4|1 // 320718	Slc26a9	ENSMUST00000049027	chr1	133640599	133668075	+	87.1211	82.5771	86.5277	80.3981	84.1097	110.133	120.281	115.096	88.3526	80.7573	84.4696	1.3684	1.3684	0.000531788	0.0286997
6845419	NM_013803 // Casr // calcium-sensing receptor // 16 B3|16 26.3 cM // 12374 /// ENSMUST0	Casr	NM_013803	chr16	36470770	36562220	-	182.595	165.749	196.84	166.661	177.509	250.695	270.197	260.264	180.77	166.956	173.726	1.4662	1.4662	0.000536461	0.0286997
6850750	NM_008938 // Prph2 // peripherin 2 // 17 C|17 18.84 cM // 19133 /// ENSMUST00000024773	Prph2	NM_008938	chr17	47047428	47061875	+	139.049	142.047	147.348	128.202	138.983	184.355	203.186	193.542	140.406	136.011	138.191	1.39256	1.39256	0.000536858	0.0286997
6949766	NM_001170395 // Cd163 // CD163 antigen // 6 F2|6 // 93671 /// ENSMUST00000112541 // Cd1	Cd163	NM_001170395	chr6	124254674	124316877	+	90.7924	94.1076	102.894	98.6591	96.5049	127.519	136.272	131.823	97.5223	93.0742	95.272	1.36597	1.36597	0.00054503	0.0286997
6805270	NM_175665 // Hist1h2bk // histone cluster 1, H2bk // 13 A2-A3|13 // 319184 /// ENSMUST0	Hist1h2bk	NM_175665	chr13	22127756	22128136	+	9943.93	12174.7	10623.7	11237.2	10964.1	6923.57	6985.75	6954.83	10024.9	12344.7	11124.9	0.634284	-1.57658	0.000546192	0.0286997
6760339	NM_133358 // Zfp617 // zinc finger protein 617 // 8 B3.3|8 // 170938 /// ENSMUST0000011	Zfp617	NM_133358	chr1	87909957	87912999	-	43.0407	47.6525	40.4919	39.7224	42.618	28.4998	24.1259	26.2219	38.1584	31.5575	34.7014	0.615277	-1.62528	0.000546975	0.0286997
6773068	---	---	---					741.612	657.693	688.628	735.362	704.971	531.155	513.251	522.124	671.964	682.625	677.271	0.740635	-1.35019	0.000559478	0.0286997
6885488	NM_008714 // Notch1 // notch 1 // 2 A3|2 15.0 cM // 18128 /// ENSMUST00000028288 // Not	Notch1	NM_008714	chr2	26313436	26442841	-	1424.95	1437.95	1419.53	1337.39	1404.36	1845.51	1862.47	1853.97	1500.26	1381	1439.45	1.32013	1.32013	0.000565565	0.0286997
6875827	NM_198628 // Gm711 // predicted gene 711 // 2 A3|2 // 279029 /// ENSMUST00000055406 //	Gm711	NM_198628	chr2	26789589	26809549	+	50.4066	51.2806	53.5996	50.4059	51.4069	66.0611	68.9505	67.4904	52.791	49.2104	50.9694	1.31287	1.31287	0.000568753	0.0286997
6784466	ENSMUST00000000127 // Wnt3 // wingless-related MMTV integration site 3 // 11 E1|11 63.0	Wnt3	ENSMUST00000000127	chr11	103628030	103679329	+	133.122	130.483	129.108	150.9	135.632	188.245	188.589	188.418	146.526	142.355	144.425	1.38918	1.38918	0.000585731	0.0286997
6869691	NM_009345 // Dntt // deoxynucleotidyltransferase, terminal // 19 C3|19 39.5 cM // 21673	Dntt	NM_009345	chr19	41103765	41134013	+	43.6406	44.3536	46.7269	47.2751	45.4731	58.8255	67.844	63.174	48.2544	45.7767	46.9991	1.38926	1.38926	0.000587977	0.0286997
6840579	NM_011638 // Tfrc // transferrin receptor // 16 B3|16 21.2 cM // 22042 /// ENSMUST00000	Tfrc	NM_011638	chr16	32593201	32632876	+	463.771	438.186	423.744	436.504	440.314	300.394	331.644	315.632	420.435	476.252	447.474	0.716832	-1.39503	0.000588031	0.0286997
6969984	NM_146812 // Olfr620 // olfactory receptor 620 // 7 E3|7 // 258808 /// ENSMUST000000521	Olfr620	NM_146812	chr7	110759924	110760909	-	35.4622	36.4529	44.4999	36.1747	37.9808	62.1689	83.174	71.9085	40.6496	51.5232	45.7646	1.89328	1.89328	0.000591943	0.0286997
6843601	NM_001161790 // Mefv // Mediterranean fever // 16 A1|16 1.1 cM // 54483 /// ENSMUST0000	Mefv	NM_001161790	chr16	3699362	3718511	-	75.4595	67.7646	83.8286	67.5864	73.3655	106.386	116.812	111.478	79.4112	79.7753	79.593	1.51948	1.51948	0.000594897	0.0286997
6977547	NM_010369 // Gypa // glycophorin A // 8 C2|8 36.0 cM // 14934 /// ENSMUST00000063359 //	Gypa	NM_010369	chr8	82849846	83035014	+	133.17	176.279	177.164	187.15	167.03	97.6264	96.5116	97.0671	154.045	148.186	151.087	0.58114	-1.72076	0.000599402	0.0286997
6819628	NM_001164220 // Trim13 // tripartite motif-containing 13 // 14 D1|14 // 66597 /// ENSMU	Trim13	NM_001164220	chr14	62217072	62224780	+	715.595	697.795	625.016	742.002	693.701	373.38	420.488	396.234	587.042	814.708	691.569	0.571188	-1.75074	0.000601027	0.0286997
6945681	NM_020502 // Tas2r108 // taste receptor, type 2, member 108 // 6 B1|6 // 57253 /// ENSM	Tas2r108	NM_020502	chr6	40443485	40444484	+	20.6188	20.0959	20.4214	17.926	19.7349	27.2851	32.9206	29.9707	20.4986	18.4122	19.4274	1.51866	1.51866	0.000601846	0.0286997
6909774	ENSMUST00000068546 // Gm4861 // predicted gene 4861 // 3 G3|3 // 229862 /// NM_177665 /	Gm4861	ENSMUST00000068546	chr3	137213009	137215586	-	35.2725	35.1477	39.7359	35.8783	36.4617	50.8724	48.0435	49.4377	35.0223	34.5008	34.7606	1.35588	1.35588	0.000604609	0.0286997
6972848	NM_207136 // Olfr1349 // olfactory receptor 1349 // 7 A1|7 // 269862 /// ENSMUST0000005	Olfr1349	NM_207136	chr7	6467185	6468138	-	320.433	316.969	326.276	281.49	310.778	523.865	466.447	494.323	342.785	270.512	304.511	1.5906	1.5906	0.000605745	0.0286997
6830370	NM_172816 // Slc30a8 // solute carrier family 30 (zinc transporter), member 8 // 15 C|1	Slc30a8	NM_172816	chr15	52090897	52167346	+	74.8028	67.9254	74.5342	70.7143	71.9369	102.691	93.5256	98.0014	75.6821	71.0129	73.3106	1.36232	1.36232	0.000608266	0.0286997
6850033	ENSMUST00000040828 // H2-Ab1 // histocompatibility 2, class II antigen A, beta 1 // 17	H2-Ab1	ENSMUST00000040828	chr17	34400067	34407164	+	193.471	149.092	143.232	177.944	164.664	291.876	315.064	303.249	157.45	122.695	138.99	1.84162	1.84162	0.000611944	0.0286997
6946407	NM_001003685 // Ghrhr // growth hormone releasing hormone receptor // 6 B3|6 26.0 cM //	Ghrhr	NM_001003685	chr6	55325580	55339162	+	204.715	179.951	199.966	188.372	193.004	265.281	259.419	262.334	198.245	185.57	191.803	1.35921	1.35921	0.000628581	0.0286997
6838637	NM_001166157 // Krt81 // keratin 81 // 15 F2|15 58.71 cM // 64818 /// ENSMUST0000006118	Krt81	NM_001166157	chr15	101261488	101347692	-	211.214	189.929	240.206	202.622	210.206	303.986	319.89	311.837	214.614	209.302	211.941	1.48347	1.48347	0.000628733	0.0286997
6966314	NM_146187 // Ffar2 // free fatty acid receptor 2 // 7 B1|7 // 233079 /// ENSMUST0000005	Ffar2	NM_146187	chr7	31603323	31621594	-	82.0619	97.8019	97.2846	88.6808	91.2201	146.586	127.534	136.728	84.8587	91.6905	88.2088	1.49889	1.49889	0.000633554	0.0286997
6812313	ENSMUST00000171686 // Rpp40 // ribonuclease P 40 subunit (human) // 13 A3.3|13 // 20836	Rpp40	ENSMUST00000171686	chr13	35985341	35998216	-	193.416	201.383	158.546	202.203	187.982	120.76	115.83	118.269	173.189	196.953	184.688	0.629156	-1.58943	0.000633758	0.0286997
6978332	ENSMUST00000034231 // Ccl22 // chemokine (C-C motif) ligand 22 // 8 C5|8 // 20299 /// N	Ccl22	ENSMUST00000034231	chr8	97232194	97275589	+	94.1997	86.2863	100.09	100.336	95.0517	136.182	130.906	133.518	90.2015	97.8968	93.9708	1.40469	1.40469	0.000635513	0.0286997
6965157	ENSMUST00000066873 // Pkp3 // plakophilin 3 // 7 F5|7 // 56460 /// NM_019762 // Pkp3 //	Pkp3	ENSMUST00000066873	chr7	148264137	148276402	+	621.728	650.331	624.358	607.496	625.788	787.066	834.235	810.31	639.283	621.302	630.228	1.29486	1.29486	0.00063704	0.0286997
6929784	ENSMUST00000011178 // Slc5a1 // solute carrier family 5 (sodium/glucose cotransporter),	Slc5a1	ENSMUST00000011178	chr5	33446878	33505509	+	92.3142	96.2057	95.8582	90.688	93.7372	123.027	119.943	121.475	90.6861	96.3431	93.4718	1.29591	1.29591	0.000639135	0.0286997
6763731	NM_008510 // Xcl1 // chemokine (C motif) ligand 1 // 1 H2.2|1 87.0 cM // 16963 /// ENSM	Xcl1	NM_008510	chr1	166861801	166916999	-	128.523	108.982	134.252	126.233	124.124	175.745	184.066	179.857	122.961	120.227	121.587	1.44901	1.44901	0.000639156	0.0286997
6784036	NM_029727 // Gsdma2 // gasdermin A2 // 11 D|11 // 76758 /// ENSMUST00000093938 // Gsdma	Gsdma2	NM_029727	chr11	98508077	98519278	+	72.1566	68.0348	77.5739	69.3176	71.6791	94.0307	101.852	97.8629	74.1456	72.1526	73.1421	1.3653	1.3653	0.000642959	0.0286997
6767844	NM_025684 // Nepn // nephrocan // 10 B3|10 // 66650 /// ENSMUST00000067085 // Nepn // n	Nepn	NM_025684	chr10	52102046	52124415	+	33.2506	36.83	42.7375	37.071	37.3216	65.1119	54.8607	59.7667	39.7348	36.0076	37.8253	1.6014	1.6014	0.00064329	0.0286997
6960547	NM_207539 // Mrgprb8 // MAS-related GPR, member B8 // 7 B4|7 // 404240 /// ENSMUST00000	Mrgprb8	NM_207539	chr7	55643953	55674614	+	41.6681	43.7106	38.4782	35.838	39.8095	58.3844	63.6633	60.9667	39.0102	45.7288	42.236	1.53146	1.53146	0.000645663	0.0286997
6825364	NM_026359 // 4930578I06Rik // RIKEN cDNA 4930578I06 gene // 14|14 C3 // 67750 /// ENSMU	4930578I06Rik	NM_026359	chr14	64588186	64630683	-	82.7106	85.8324	97.4784	85.063	87.5922	119.36	127.977	123.594	87.3612	92.8461	90.0616	1.41101	1.41101	0.000645678	0.0286997
6926393	NM_011061 // Padi4 // peptidyl arginine deiminase, type IV // 4 E1|4 71.0 cM // 18602 /	Padi4	NM_011061	chr4	140301436	140330129	-	98.4582	94.6756	97.4068	94.2382	96.1777	122.092	121.688	121.89	91.2505	90.9915	91.1209	1.26733	1.26733	0.000646638	0.0286997
6784263	ENSMUST00000019469 // G6pc // glucose-6-phosphatase, catalytic // 11 D|11 // 14377 ///	G6pc	ENSMUST00000019469	chr11	101228882	101239216	+	59.8973	57.8799	61.6398	59.4927	59.7125	74.6536	80.2678	77.4096	57.6856	58.8072	58.2437	1.29638	1.29638	0.000649221	0.0286997
6758437	NR_037691 // Gm4776 // sperm motility kinase W // 1 C1.1|1 // 212225 /// NR_037690 // G	Gm4776	NR_037691	chr1	46068602	46087314	-	53.5959	45.6635	58.5988	49.0938	51.5114	77.4745	78.0642	77.7688	55.9056	53.6922	54.7877	1.50974	1.50974	0.000649498	0.0286997
6789630	ENSMUST00000117510 // Olfr398 // olfactory receptor 398 // 11 B4|11 // 258705 /// NM_14	Olfr398	ENSMUST00000117510	chr11	73797164	73800757	-	144.704	164.803	172.64	154.926	158.919	235.163	218.388	226.621	168.357	180.127	174.142	1.42601	1.42601	0.000651475	0.0286997
6949094	NM_178942 // Il17rc // interleukin 17 receptor C // 6 E3|6 // 171095 /// NM_134159 // I	Il17rc	NM_178942	chr6	113420949	113433113	+	484.418	451.03	487.866	471.26	473.421	650.241	774.327	709.574	502.208	421.842	460.274	1.49883	1.49883	0.000656844	0.0286997
6867747	NM_139301 // Catsper1 // cation channel, sperm associated 1 // 19 A|19 // 225865 /// EN	Catsper1	NM_139301	chr19	5335645	5344265	+	63.0437	60.5998	63.6849	65.6503	63.2187	81.1855	81.0522	81.1186	65.3729	64.6519	65.0114	1.28314	1.28314	0.000660317	0.0286997
6987513	NM_175678 // Npsr1 // neuropeptide S receptor 1 // 9 A3-A4|9 // 319239 /// ENSMUST00000	Npsr1	NM_175678	chr9	23744702	24143645	+	63.9366	63.9339	75.7671	64.0608	66.7405	98.0156	93.0781	95.5153	70.4023	73.3711	71.8716	1.43114	1.43114	0.000663709	0.0286997
6925519	NM_205823 // Tlr12 // toll-like receptor 12 // 4 D2.2|4 // 384059 /// ENSMUST0000007482	Tlr12	NM_205823	chr4	128292707	128358202	-	115.386	112.413	145.154	116.428	121.678	189.977	187.484	188.726	130.25	124.351	127.267	1.55102	1.55102	0.000666124	0.0286997
6854826	ENSMUST00000067801 // Cbs // cystathionine beta-synthase // 17 A-C|17 17.4 cM // 12411	Cbs	ENSMUST00000067801	chr17	31749530	31774173	-	278.986	303.085	297.649	280.236	289.797	380.98	470.229	423.26	291.368	304.076	297.653	1.46053	1.46053	0.000669655	0.0286997
6818958	NM_030098 // Rnase6 // ribonuclease, RNase A family, 6 // 14 C1|14 // 78416 /// ENSMUST	Rnase6	NM_030098	chr14	51744328	51751088	+	147.946	156.86	164.396	164.623	158.307	207.008	212.882	209.925	167.012	160.535	163.741	1.32606	1.32606	0.000670301	0.0286997
6781989	NM_009659 // Alox12b // arachidonate 12-lipoxygenase, 12R type // 11 B3|11 37.0 cM // 1	Alox12b	NM_009659	chr11	68970501	68983293	+	83.7705	92.7169	92.2521	79.5246	86.8829	117.76	125.9	121.763	85.7895	87.9542	86.8654	1.40146	1.40146	0.00068339	0.0286997
7015406	NM_018832 // Magix // MAGI family member, X-linked // X A1.1|X 1.6 cM // 54634 /// ENSM	Magix	NM_018832	chrX	7251754	7265623	-	180.588	176.818	202.947	173.444	183.1	251.527	271.86	261.497	182.736	164.355	173.301	1.42816	1.42816	0.000684002	0.0286997
6985900	NM_011404 // Slc7a5 // solute carrier family 7 (cationic amino acid transporter, y+ sys	Slc7a5	NM_011404	chr8	124405052	124434100	-	2132.46	2256.7	1986.34	1950.46	2078.03	2772.94	3046.84	2906.57	2098.15	2202.77	2149.82	1.39881	1.39881	0.000684006	0.0286997
6854930	NM_009542 // Zfp101 // zinc finger protein 101 // 17 B1|17 // 22643 /// ENSMUST00000167	Zfp101	NM_009542	chr17	33498046	33531586	-	964.97	960.079	881.673	957.388	940.38	728.79	711.061	719.874	926.958	958.504	942.599	0.76551	-1.30632	0.000686109	0.0286997
6843494	NM_001177887 // Igsf5 // immunoglobulin superfamily, member 5 // 16 C4|16 // 72058 ///	Igsf5	NM_001177887	chr16	96552782	96643718	+	121.621	131.041	132.012	123.249	126.898	162.346	174.669	168.394	126.19	132.575	129.343	1.32702	1.32702	0.000689068	0.0286997
6792887	NM_178763 // Zfp750 // zinc finger protein 750 // 11 E2|11 // 319530 /// ENSMUST0000009	Zfp750	NM_178763	chr11	121372289	121380637	-	745.72	772.521	727.448	747.79	748.2	1037.07	1239.81	1133.92	841.891	688.513	761.347	1.51553	1.51553	0.000694235	0.0286997
6984513	NM_001195413 // Cngb1 // cyclic nucleotide gated channel beta 1 // 8 D1|8 // 333329 ///	Cngb1	NM_001195413	chr8	97747698	97830485	-	268.651	250.36	267.688	265.602	262.969	341.841	343.579	342.709	277.138	256.971	266.864	1.30323	1.30323	0.000696434	0.0286997
6869294	NM_001205349 // Lipk // lipase, family member K // 19 C1|19 // 240633 /// NM_172837 //	Lipk	NM_001205349	chr19	34082246	34122373	+	28.8304	27.361	26.3089	25.7957	27.0495	34.8052	37.8489	36.295	26.9993	27.8711	27.4318	1.34181	1.34181	0.000698295	0.0286997
6892155	NM_145157 // Defb19 // defensin beta 19 // 2 H1|2 // 246700 /// ENSMUST00000053180 // D	Defb19	NM_145157	chr2	152401825	152406092	-	110.035	117.854	100.669	102.997	107.683	151.421	169.72	160.31	106.337	124.237	114.939	1.48871	1.48871	0.000705249	0.0287211
6841362	NM_020509 // Retnla // resistin like alpha // 16 B5|16 32.6 cM // 57262 /// ENSMUST0000	Retnla	NM_020509	chr16	48758569	48867812	+	26.5675	22.9797	27.5216	23.0174	24.9376	38.8642	37.2227	38.0346	27.0735	23.1532	25.0368	1.52519	1.52519	0.000708016	0.0287211
6844099	NM_028968 // Ifitm7 // interferon induced transmembrane protein 7 // 16 A1|16 // 74482	Ifitm7	NM_028968	chr16	13981805	13987139	-	171.952	162.441	157.848	162.262	163.546	214.337	218.144	216.233	187.528	170.132	178.619	1.32215	1.32215	0.000712482	0.0287211
6960445	ENSMUST00000164538 // Otog // otogelin // 7 B4-C|7 28.0 cM // 18419 /// NM_013624 // Ot	Otog	ENSMUST00000164538	chr7	53496357	53566804	+	154.032	155.435	171.273	151.572	157.895	204.837	222.4	213.438	152.623	156.469	154.534	1.35177	1.35177	0.000715631	0.0287211
6814018	ENSMUST00000057070 // Zfp456 // zinc finger protein 456 // 13 B3|13 40.9 cM // 408065 /	Zfp456	ENSMUST00000057070	chr13	67371327	67511956	-	92.6976	116.039	98.8329	98.6037	101.185	67.1856	70.3189	68.7344	85.4406	91.9266	88.6243	0.679294	-1.47212	0.000722617	0.0287211
6992379	NM_145077 // Ucn2 // urocortin 2 // 9 F2|9 // 171530 /// ENSMUST00000052724 // Ucn2 //	Ucn2	NM_145077	chr9	108888228	108889070	+	173.237	186.717	165.853	169.095	173.548	237.982	320.347	276.11	157.443	159.378	158.408	1.59097	1.59097	0.000728615	0.0287211
6934562	ENSMUST00000117102 // Fzd10 // frizzled homolog 10 (Drosophila) // 5 G1.3|5 // 93897 //	Fzd10	ENSMUST00000117102	chr5	129106729	129109964	+	332.818	451.762	462.981	407.529	410.401	664.35	726.707	694.832	420.887	428.197	424.526	1.69304	1.69304	0.00073209	0.0287211
7020644	NM_009789 // S100g // S100 calcium binding protein G // X F4|X // 12309 /// ENSMUST0000	S100g	NM_009789	chrX	159399924	159409303	-	50.4027	45.1915	51.3642	47.6727	48.5972	65.2886	66.184	65.7346	55.4898	51.2983	53.3527	1.35265	1.35265	0.00073572	0.0287211
6824820	NM_008736 // Nrl // neural retina leucine zipper gene // 14 C3|14 19.5 cM // 18185 ///	Nrl	NM_008736	chr14	56137825	56179544	-	82.3576	73.172	87.8019	87.7076	82.5371	114.089	130.117	121.841	93.4194	88.1403	90.7415	1.47619	1.47619	0.00073693	0.0287211
6959432	NM_026716 // Sycn // syncollin // 7 A3|7 // 68416 /// ENSMUST00000119180 // Sycn // syn	Sycn	NM_026716	chr7	29325899	29327217	+	203.628	238.574	261.069	229.669	232.315	336.737	385.031	360.077	237.893	216.788	227.095	1.54994	1.54994	0.000737016	0.0287211
6947692	NM_025467 // Gkn2 // gastrokine 2 // 6|6 D2 // 66284 /// ENSMUST00000032128 // Gkn2 //	Gkn2	NM_025467	chr6	87323295	87329488	+	47.2349	50.6914	49.4422	45.0211	48.0482	62.0027	65.6822	63.8157	44.0176	44.4789	44.2477	1.32816	1.32816	0.000743565	0.0287211
6974857	NM_027618 // Poteg // POTE ankyrin domain family, member G // 8 A2|8 // 70952 /// ENSMU	Poteg	NM_027618	chr8	28558142	28605422	+	47.3217	40.7334	41.9855	40.7495	42.6144	60.908	60.1282	60.5166	45.2915	39.8476	42.4826	1.4201	1.4201	0.000750555	0.0287211
6871581	NM_146936 // Olfr1417 // olfactory receptor 1417 // 19 C1|19 // 258938 /// ENSMUST00000	Olfr1417	NM_146936	chr19	11902567	11910448	-	80.8626	64.7061	79.3072	81.5713	76.2756	124.733	178.055	149.028	95.7427	75.7424	85.1574	1.95381	1.95381	0.000752835	0.0287211
6848594	NM_011866 // Pde10a // phosphodiesterase 10A // 17 A1|17 // 23984 /// ENSMUST0000008908	Pde10a	NM_011866	chr17	8718083	9179499	+	325.513	319.402	290.374	289.592	305.782	400.853	449.021	424.256	315.932	304.648	310.24	1.38744	1.38744	0.000753247	0.0287211
6751535	NM_016894 // Ramp1 // receptor (calcitonin) activity modifying protein 1 // 1 D|1 56.0	Ramp1	NM_016894	chr1	93076419	93120251	+	511.706	486.491	533.905	521.911	513.204	702.045	730.601	716.181	647.331	546.493	594.779	1.39551	1.39551	0.000758559	0.0287211
7016340	NM_019443 // Ndufa1 // NADH dehydrogenase (ubiquinone) 1 alpha subcomplex, 1 // X|X A2	Ndufa1	NM_019443	chrX	34727602	34732028	-	89.5462	87.6286	77.604	98.45	87.9932	45.7418	59.1518	52.0166	98.6823	85.1137	91.6473	0.591142	-1.69164	0.000760417	0.0287211
6955539	NM_009527 // Wnt7a // wingless-related MMTV integration site 7A // 6 D1|6 39.5 cM // 22	Wnt7a	NM_009527	chr6	91288098	91373922	-	120.676	115.682	133.174	106.742	118.69	167.961	172.603	170.266	127.883	124.518	126.189	1.43455	1.43455	0.000770453	0.0287211
6867973	BC047099 // 1810009A15Rik // RIKEN cDNA 1810009A15 gene // 19 A|19 // 66276 /// ENSMUST	1810009A15Rik	BC047099	chr19	8955302	8967097	+	1406.8	1500.89	1284.06	1438.05	1405.24	1040.89	987.653	1013.92	1326.95	1456.91	1390.42	0.721554	-1.3859	0.000782876	0.0287211
6754149	NM_008131 // Glul // glutamate-ammonia ligase (glutamine synthetase) // 1 G2|1 // 14645	Glul	NM_008131	chr1	155746721	155757023	+	1205.74	1341.94	1199.07	1192.44	1233.29	1801.27	1662.57	1730.53	1367	1198.32	1279.89	1.40318	1.40318	0.000785548	0.0287211
6950992	NM_001163628 // Lyrm5 // LYR motif containing 5 // 6 G3|6 71.12 cM // 67636 /// ENSMUST	Lyrm5	NM_001163628	chr6	145159659	145166132	+	434.144	424.282	410.56	465.985	433.269	320.695	250.169	283.246	385.854	418.47	401.83	0.653738	-1.52966	0.000786678	0.0287211
7011277	NM_028671 // Fam122c // family with sequence similarity 122, member C // X A5|X // 7386	Fam122c	NM_028671	chrX	50599351	50684362	+	29.2844	32.0519	34.1916	28.9361	31.0429	42.1138	46.1484	44.0851	35.4809	33.6994	34.5787	1.42013	1.42013	0.000790708	0.0287211
6911576	AK083919 // D130060J02Rik // RIKEN cDNA D130060J02 gene // 4 A1|4 // 320266 /// AK05161	D130060J02Rik	AK083919	chr4	9322536	9326733	+	33.2145	30.1618	36.2812	31.8056	32.7901	46.1353	46.6056	46.37	33.3536	36.8234	35.0456	1.41414	1.41414	0.000791034	0.0287211
7013909	ENSMUST00000086884 // Armcx3 // armadillo repeat containing, X-linked 3 // X E3|X // 71	Armcx3	ENSMUST00000086884	chrX	131291134	131296608	+	397.803	390.514	413.427	389.257	397.635	500.324	575.711	536.696	455.994	432.067	443.869	1.34972	1.34972	0.000799184	0.0287211
6825322	NM_021480 // Tdh // L-threonine dehydrogenase // 14 D1|14 // 58865 /// ENSMUST000000225	Tdh	NM_021480	chr14	64111184	64127929	-	78.6912	71.0991	75.9433	58.1441	70.5009	110.873	115.011	112.923	63.9144	61.031	62.4561	1.60172	1.60172	0.000801495	0.0287211
6906721	NM_021375 // Rhbg // Rhesus blood group-associated B glycoprotein // 3 F1|3 42.0 cM //	Rhbg	NM_021375	chr3	88018177	88058614	-	195.563	220.398	244.503	207.788	216.321	316.013	343.751	329.59	233.298	200.642	216.356	1.52361	1.52361	0.000801793	0.0287211
6949294	NM_146912 // Olfr211 // olfactory receptor 211 // 6 F1|6 // 258914 /// ENSMUST000000657	Olfr211	NM_146912	chr6	116439155	116444558	+	110.006	87.0782	105.397	97.8507	99.6964	143.641	149.942	146.757	95.5252	92.0586	93.7756	1.47204	1.47204	0.000803645	0.0287211
6957423	ENSMUST00000032270 // Klrc1 // killer cell lectin-like receptor subfamily C, member 1 /	Klrc1	ENSMUST00000032270	chr6	129599422	129628928	-	19.7744	17.7886	18.6717	21.3759	19.357	26.1147	28.5411	27.301	20.2678	19.8368	20.0511	1.41039	1.41039	0.00080657	0.0287211
6855225	NM_010814 // Mog // myelin oligodendrocyte glycoprotein // 17 C|17 20.34 cM // 17441 //	Mog	NM_010814	chr17	37147691	37166021	-	118.185	106.239	133.218	126.594	120.63	169.7	199.926	184.194	118.862	123.884	121.347	1.52693	1.52693	0.000817628	0.0287211
6833394	ENSMUST00000023806 // Soat2 // sterol O-acyltransferase 2 // 15 F3|15 61.7 cM // 223920	Soat2	ENSMUST00000023806	chr15	101980844	101997636	+	140.55	131.141	127.767	142.433	135.331	176.834	182.234	179.514	138.431	130.547	134.431	1.32647	1.32647	0.000818506	0.0287211
6983235	NM_053248 // Slc5a5 // solute carrier family 5 (sodium iodide symporter), member 5 // 8	Slc5a5	NM_053248	chr8	73406790	73416662	-	208.408	201.734	220.104	190.498	204.905	281.847	270.22	275.972	214.673	202.998	208.754	1.34683	1.34683	0.000818935	0.0287211
6941936	---	---	---					293.413	287.582	271.429	369.042	303.209	163.404	193.033	177.602	362.85	416.517	388.758	0.585738	-1.70725	0.000820167	0.0287211
6960301	NM_010215 // Il4i1 // interleukin 4 induced 1 // 7 B4|7 23.1 cM // 14204 /// NM_010215	Il4i1	NM_010215	chr7	52091659	52096539	+	168.543	164.89	166.242	173.912	168.362	210.161	219.468	214.764	172.104	163.524	167.759	1.27561	1.27561	0.000832786	0.0287211
6755540	NM_024282 // Pppde1 // PPPDE peptidase domain containing 1 // 1|1 H3 // 78825 /// ENSMU	Pppde1	NM_024282	chr1	180117558	180197483	+	1598.72	1727.66	1846.53	1836.7	1749.47	1267.79	1221.98	1244.63	1571.69	1788.58	1676.57	0.711458	-1.40556	0.000835439	0.0287211
6965123	ENSMUST00000026554 // 1190003J15Rik // RIKEN cDNA 1190003J15 gene // 7 F5|7 // 76974 //	1190003J15Rik	ENSMUST00000026554	chr7	148020937	148023858	+	268.08	254.311	241.147	248.869	252.913	319.59	354.782	336.726	225.9	223.466	224.679	1.3314	1.3314	0.000842522	0.0287211
6885385	ENSMUST00000043379 // 2310002J15Rik // RIKEN cDNA 2310002J15 gene // 2 A3|2 // 67859 //	2310002J15Rik	ENSMUST00000043379	chr2	25094347	25097952	-	133.762	161.472	167.568	149.491	152.513	250.657	219.025	234.308	139.832	156.763	148.056	1.53631	1.53631	0.000843336	0.0287211
6873249	NM_007700 // Chuk // conserved helix-loop-helix ubiquitous kinase // 19 C3|19 45.0 cM /	Chuk	NM_007700	chr19	44147833	44181949	-	641.098	646.264	593.519	680.943	639.69	493.488	432.717	462.106	624.562	654.959	639.58	0.722388	-1.3843	0.000845872	0.0287211
6875551	AK048278 // C130046B21Rik // RIKEN cDNA C130046B21 gene // 2 A3|2 // 442817 /// AK04827	C130046B21Rik	AK048278	chr2	21062557	21065823	+	130.526	133.602	139.574	130.48	133.495	165.947	176.88	171.326	130.007	130.411	130.209	1.28339	1.28339	0.000853723	0.0287211
6769569	AF285583 // Tex18 // testis expressed gene 18 // 10 C1|10 // 83559 /// AF285583 // Tex1	Tex18	AF285583	chr10	86376244	86377425	+	36.8073	37.5263	36.5168	31.8513	35.6018	55.1477	47.8567	51.3731	39.7193	37.2351	38.4572	1.44299	1.44299	0.000854567	0.0287211
6764864	NR_038006 // 9630028B13Rik // RIKEN cDNA 9630028B13 gene // 1 H5|1 // 319562 /// NR_038	9630028B13Rik	NR_038006	chr1	187253234	187265698	-	172.03	163.309	174.417	158.885	167.041	212.076	243.771	227.372	160.734	166.024	163.358	1.36118	1.36118	0.000855278	0.0287211
6875377	BC049634 // BC061194 // cDNA sequence BC061194 // 2 A3|2 // 381350 /// ENSMUST000000951	BC061194	BC049634	chr2	18615679	18742231	+	165.629	151.864	151.037	149.454	154.364	200.824	235.55	217.495	150.474	164.594	157.376	1.40898	1.40898	0.000858254	0.0287211
6917909	ENSMUST00000045747 // Wnt4 // wingless-related MMTV integration site 4 // 4 D3|4 // 224	Wnt4	ENSMUST00000045747	chr4	136833414	136855621	+	564.547	595.538	556.802	608.09	580.857	769.347	850.166	808.744	594.705	514.341	553.067	1.39233	1.39233	0.000860041	0.0287211
6796567	NM_134246 // Acot3 // acyl-CoA thioesterase 3 // 12 D1|12 // 171281 /// ENSMUST00000021	Acot3	NM_134246	chr12	85393101	85399976	+	48.5837	52.6543	51.3731	46.7194	49.7785	71.5892	63.7552	67.5587	54.6008	54.8584	54.7296	1.35719	1.35719	0.000864606	0.0287211
6936760	NM_145401 // Prkag2 // protein kinase, AMP-activated, gamma 2 non-catalytic subunit //	Prkag2	NM_145401	chr5	24352941	24606488	-	596.261	608.482	590.454	603.667	599.676	489.726	449.781	469.327	562.567	576.597	569.539	0.782637	-1.27773	0.000870107	0.0287211
6964090	NM_007474 // Aqp8 // aquaporin 8 // 7 F3|7 61.0 cM // 11833 /// NM_001109045 // Aqp8 //	Aqp8	NM_007474	chr7	130605823	130611500	+	87.2891	100.518	103.955	84.1808	93.6087	134.986	154.733	144.523	94.4475	84.6906	89.4358	1.54391	1.54391	0.0008724	0.0287211
6751546	NM_027551 // Klhl30 // kelch-like 30 (Drosophila) // 1|1 C5 // 70788 /// ENSMUST0000002	Klhl30	NM_027551	chr1	93244259	93259068	+	136.939	135.218	144.82	140.268	139.263	174.502	189.179	181.693	147.17	138.06	142.543	1.30467	1.30467	0.000872507	0.0287211
6887972	NM_028235 // Ttc30b // tetratricopeptide repeat domain 30B // 2 C3|2 // 72421 /// ENSMU	Ttc30b	NM_028235	chr2	75773906	75776622	-	297.66	254.939	256.618	268.493	268.903	191.415	181.781	186.536	303.176	258.884	280.155	0.693695	-1.44156	0.000874655	0.0287211
6881164	NM_177726 // Tgm6 // transglutaminase 6 // 2 F1|2 // 241636 /// ENSMUST00000028888 // T	Tgm6	NM_177726	chr2	129938162	129979968	+	100.118	102.901	114.034	100.175	104.155	152.976	138.715	145.671	111.657	100.199	105.773	1.39859	1.39859	0.000876848	0.0287211
6775673	NM_028832 // Mterfd3 // MTERF domain containing 3 // 10 C1|10 // 74238 /// ENSMUST00000	Mterfd3	NM_028832	chr10	84582145	84590816	-	178.815	183.63	172.365	197.674	182.888	139.52	126.585	132.896	189.443	206.605	197.839	0.726646	-1.37619	0.000879156	0.0287211
6838645	NM_008474 // Krt84 // keratin 84 // 15 F2|15 58.74 cM // 16680 /// ENSMUST00000023720 /	Krt84	NM_008474	chr15	101355458	101363231	-	94.2147	93.1368	114.765	94.5955	98.7939	138.984	155.183	146.86	110.538	104.771	107.616	1.48653	1.48653	0.000904065	0.028828
6785669	ENSMUST00000009219 // Cabp7 // calcium binding protein 7 // 11 A1|11 // 192650 /// NM_1	Cabp7	ENSMUST00000009219	chr11	4636909	4647145	-	159.787	163.432	165.683	138.465	156.449	215.577	226.939	221.185	168.483	155.587	161.907	1.41378	1.41378	0.000909077	0.028828
6996629	NM_028087 // Gcnt3 // glucosaminyl (N-acetyl) transferase 3, mucin type // 9 D|9 // 720	Gcnt3	NM_028087	chr9	69880917	69884722	-	214.436	217.983	210.337	209.307	212.988	303.763	272.392	287.65	204.952	232.652	218.364	1.35055	1.35055	0.000910498	0.028828
6867840	NM_028967 // Batf2 // basic leucine zipper transcription factor, ATF-like 2 // 19 A|19	Batf2	NM_028967	chr19	6140993	6172476	+	177.916	197.402	211.435	186.624	192.942	262.887	262.792	262.84	189.108	193.438	191.261	1.36227	1.36227	0.000912974	0.028828
6836716	NM_025929 // 2010109I03Rik // RIKEN cDNA 2010109I03 gene // 15 D3|15 // 67038 /// ENSMU	2010109I03Rik	NM_025929	chr15	74707423	74727441	-	115.696	121.784	165.622	135.938	133.457	227.983	222.327	225.137	158.601	150.857	154.681	1.68696	1.68696	0.00091443	0.028828
6871166	NM_198650 // Slc22a20 // solute carrier family 22 (organic anion transporter), member 2	Slc22a20	NM_198650	chr19	5966925	5986203	-	115.801	116.684	111.522	94.2336	109.162	160.01	163.469	161.731	116.61	103.891	110.066	1.48156	1.48156	0.000915392	0.028828
6974630	NM_145592 // Dkk4 // dickkopf homolog 4 (Xenopus laevis) // 8 A2|8 // 234130 /// ENSMUS	Dkk4	NM_145592	chr8	23722635	23738016	+	153.597	149.04	172.053	155.445	157.301	209.413	211.646	210.527	164.562	155.46	159.946	1.33837	1.33837	0.000922702	0.028828
6962933	NM_009464 // Ucp3 // uncoupling protein 3 (mitochondrial, proton carrier) // 7 E3|7 50.	Ucp3	NM_009464	chr7	107621500	107635243	+	95.2938	99.2462	109.924	102.689	101.648	131.914	138.854	135.34	99.7013	98.2796	98.9879	1.33145	1.33145	0.000930388	0.028828
6764246	NM_008329 // Ifi204 // interferon activated gene 204 // 1 H3|1 95.2 cM // 15951 /// ENS	Ifi204	NM_008329	chr1	175677424	175929523	-	83.7507	77.84	77.4117	81.2125	80.0123	53.0853	62.402	57.5554	94.7688	86.4312	90.504	0.719335	-1.39017	0.000930411	0.028828
6937881	NM_021416 // Fam184b // family with sequence similarity 184, member B // 5 B3|5 // 5822	Fam184b	NM_021416	chr5	45920944	46030794	-	241.637	262.869	267.379	236.909	251.857	331.186	336.845	334.004	238.349	229.994	234.134	1.32617	1.32617	0.000933844	0.028828
6807000	NM_029173 // Nxnl2 // nucleoredoxin-like 2 // 13|13 B1 // 75124 /// ENSMUST00000021828	Nxnl2	NM_029173	chr13	51266391	51270555	+	185.217	167.457	193.837	172.033	179.332	252.78	241.758	247.208	182.577	164.912	173.52	1.37849	1.37849	0.00093755	0.028828
6838671	NM_010668 // Krt2 // keratin 2 // 15 F2|15 58.8 cM // 16681 /// ENSMUST00000023712 // K	Krt2	NM_010668	chr15	101641130	101657198	-	75.4129	88.1568	83.4234	78.4951	81.2283	112.383	107.832	110.084	85.9926	82.0175	83.9815	1.35524	1.35524	0.000940634	0.028828
6855234	NM_146513 // Olfr95 // olfactory receptor 95 // 17 B1|17 // 258506 /// ENSMUST000000607	Olfr95	NM_146513	chr17	37347858	37353482	-	169.124	153.494	198.132	177.845	173.909	245.951	285.05	264.78	178.945	182.961	180.942	1.52251	1.52251	0.000941034	0.028828
6952679	NM_172892 // Slc13a4 // solute carrier family 13 (sodium/sulfate symporters), member 4	Slc13a4	NM_172892	chr6	35212616	35258126	-	186.739	186.105	200.516	171.207	185.851	250.85	256.462	253.64	183.848	166.705	175.067	1.36475	1.36475	0.000941755	0.028828
6901435	NM_020265 // Dkk2 // dickkopf homolog 2 (Xenopus laevis) // 3|3 H2 // 56811 /// ENSMUST	Dkk2	NM_020265	chr3	131748256	131843257	+	1333.04	1379.38	1393.6	1446.95	1387.62	1857.7	2050.41	1951.68	1547.05	1292.81	1414.23	1.40647	1.40647	0.000948914	0.028828
6951552	NM_026632 // Rpa3 // replication protein A3 // 6 A1|6 // 68240 /// BC028489 // Rpa3 //	Rpa3	NM_026632	chr6	8192566	8209987	-	264.573	342.866	216.185	340.412	285.841	115.368	83.4228	98.104	245.288	446.121	330.799	0.34321	-2.91367	0.000957431	0.028828
6899456	NM_025501 // Lce3b // late cornified envelope 3B // 3 F1|3 // 66344 /// ENSMUST00000046	Lce3b	NM_025501	chr3	92722230	92738020	+	23.2094	13.4312	14.0993	23.9788	18.0178	62.6864	52.7076	57.4809	16.9848	28.9419	22.1714	3.19023	3.19023	0.000960369	0.028828
6868070	NM_009962 // Gpr44 // G protein-coupled receptor 44 // 19 A|19 // 14764 /// ENSMUST0000	Gpr44	NM_009962	chr19	11004891	11017001	+	196.314	176.711	209.044	196.132	194.2	261.836	261.01	261.423	193.424	199.07	196.226	1.34615	1.34615	0.000966616	0.028828
6929364	NM_026449 // Galntl5 // UDP-N-acetyl-alpha-D-galactosamine:polypeptide N-acetylgalactos	Galntl5	NM_026449	chr5	24666336	24726107	+	40.4694	45.6297	45.2642	41.2511	43.0915	58.5696	58.6728	58.6212	45.9955	41.3547	43.6134	1.36039	1.36039	0.00096923	0.028828
6856266	NM_175731 // Acer1 // alkaline ceramidase 1 // 17 D|17 // 171168 /// ENSMUST00000056113	Acer1	NM_175731	chr17	57092913	57121531	-	75.7897	85.3323	82.0152	74.8526	79.3792	119.083	103.373	110.95	79.8688	75.8449	77.8308	1.39773	1.39773	0.000969257	0.028828
6805200	NM_145451 // Gpx6 // glutathione peroxidase 6 // 13 A3.1|13 // 75512 /// ENSMUST0000000	Gpx6	NM_145451	chr13	21404072	21412438	+	62.9598	65.6476	62.4509	64.4259	63.8586	93.9688	86.2241	90.0129	74.9658	61.3606	67.8229	1.40957	1.40957	0.000974929	0.028828
6968830	NM_001193274 // BC048679 // cDNA sequence BC048679 // 7 D3|7 // 210321 /// NM_183143 //	BC048679	NM_001193274	chr7	88639161	88660397	-	110.791	118.695	105.713	105.357	110.01	159.071	145.863	152.324	124.799	141.771	133.015	1.38464	1.38464	0.000976273	0.028828
6985957	ENSMUST00000098334 // Ankrd11 // ankyrin repeat domain 11 // 8|8 E2 // 77087 /// ENSMUS	Ankrd11	ENSMUST00000098334	chr8	125394505	125566153	-	1110.12	1033.77	1022.91	1116.99	1070.08	760.545	731.66	745.963	976.909	1207.41	1086.07	0.697103	-1.43451	0.000976342	0.028828
6960182	NM_011177 // Klk6 // kallikrein related-peptidase 6 // 7 B4-B5|7 24.0 cM // 19144 /// E	Klk6	NM_011177	chr7	51079889	51087392	+	113.645	115.082	114.31	99.2503	110.368	152.171	146.247	149.179	110.291	109.192	109.74	1.35165	1.35165	0.000979329	0.028828
6999689	NM_007718 // Ccr1l1 // chemokine (C-C motif) receptor 1-like 1 // 9 F4|9 71.7 cM // 127	Ccr1l1	NM_007718	chr9	123891680	123893241	-	125.479	159.327	148.202	122.448	138.012	300.729	214.266	253.843	172.342	153.019	162.393	1.83928	1.83928	0.000981766	0.028828
6870375	NM_008386 // Ins1 // insulin I // 19 D2|19 49.0 cM // 16333 /// ENSMUST00000039652 // I	Ins1	NM_008386	chr19	52338819	52339955	+	421.974	452.433	376.673	460.788	426.653	613.84	623.874	618.839	337.979	381.574	359.117	1.45044	1.45044	0.000981774	0.028828
6855756	NM_029296 // 1700001C19Rik // RIKEN cDNA 1700001C19 gene // 17 C|17 // 75462 /// ENSMUS	1700001C19Rik	NM_029296	chr17	47549698	47574305	-	86.966	83.593	106.475	89.6611	91.2732	130.645	140.58	135.522	101.796	108.441	105.066	1.48479	1.48479	0.000984246	0.028828
6970890	NM_025989 // Gp2 // glycoprotein 2 (zymogen granule membrane) // 7 F1-F2|7 55.0 cM // 6	Gp2	NM_025989	chr7	126586058	126602786	-	44.2501	45.8707	43.6355	44.1845	44.4774	55.8765	56.3573	56.1164	42.7449	45.4085	44.0564	1.26168	1.26168	0.000992888	0.0289701
6848201	NM_020622 // Fam3b // family with sequence similarity 3, member B // 16 C4|16 71.3 cM /	Fam3b	NM_020622	chr16	97692416	97747583	-	63.16	58.8724	71.2521	61.9435	63.6483	85.5271	100.718	92.8127	65.4872	62.2667	63.8569	1.45821	1.45821	0.00100305	0.0290811
6765166	ENSMUST00000175916 // Prox1 // prospero-related homeobox 1 // 1 H6|1 106.3 cM // 19130	Prox1	ENSMUST00000175916	chr1	191943166	191999411	-	359.396	368.561	352.017	384.172	365.84	238.335	283.045	259.73	304.34	341.152	322.222	0.709953	-1.40854	0.00100552	0.0290811
7002728	---	---	---					608.836	618.817	568.509	601.554	599.128	473.277	430.106	451.177	567.588	518.831	542.662	0.753055	-1.32792	0.0010145	0.0290811
6924718	NM_007822 // Cyp4a14 // cytochrome P450, family 4, subfamily a, polypeptide 14 // 4 D1|	Cyp4a14	NM_007822	chr4	115158750	115168718	-	59.0191	64.8709	65.2579	58.4354	61.8139	81.8142	92.2668	86.8835	62.5349	55.3764	58.8471	1.40556	1.40556	0.00101675	0.0290811
6852882	NM_008532 // Epcam // epithelial cell adhesion molecule // 17 E4|17 // 17075 /// ENSMUS	Epcam	NM_008532	chr17	88035339	88065251	+	1803.15	1921.88	1579.99	1649.03	1733.41	1084.87	1274.66	1175.94	1566.9	1650.86	1608.39	0.678384	-1.47409	0.00103084	0.0290811
6935041	NM_021719 // Cldn15 // claudin 15 // 5 G2|5 // 60363 /// ENSMUST00000111093 // Cldn15 /	Cldn15	NM_021719	chr5	137442968	137451711	+	86.2905	90.5009	102.297	95.6286	93.4906	123.526	139.701	131.365	95.3248	89.973	92.6103	1.40512	1.40512	0.00103332	0.0290811
6818157	NM_015745 // Rbp3 // retinol binding protein 3, interstitial // 14 B|14 13.0 cM // 1966	Rbp3	NM_015745	chr14	34767186	34779713	+	84.7123	78.9917	91.0464	74.5182	82.0852	110.778	125.928	118.11	85.8532	88.6415	87.2365	1.43888	1.43888	0.0010353	0.0290811
6788399	ENSMUST00000020502 // Slc36a3 // solute carrier family 36 (proton/amino acid symporter)	Slc36a3	ENSMUST00000020502	chr11	54935283	54965210	-	130.755	143.681	148.88	131.379	138.454	189.893	185.998	187.935	140.813	127.969	134.238	1.35738	1.35738	0.00103573	0.0290811
6955766	ENSMUST00000054344 // Eogt // EGF domain-specific O-linked N-acetylglucosamine (GlcNAc)	Eogt	ENSMUST00000054344	chr6	97059942	97099454	-	1142.2	1044.5	996.696	1099.17	1069.26	1403.68	1451.67	1427.43	1079.02	1001.23	1039.37	1.33505	1.33505	0.00103604	0.0290811
6851885	NM_177278 // L3mbtl4 // l(3)mbt-like 4 (Drosophila) // 17 E1.2|17 // 320858 /// ENSMUST	L3mbtl4	NM_177278	chr17	69113891	69129426	+	48.0196	47.4222	53.3254	51.6945	50.0546	66.498	65.5903	66.0428	52.1787	49.1034	50.6177	1.31941	1.31941	0.0010388	0.0290811
6875746	NM_178036 // Lcn10 // lipocalin 10 // 2 A3|2 // 332578 /// ENSMUST00000058912 // Lcn10	Lcn10	NM_178036	chr2	25538246	25541601	+	147.652	125.051	148.163	134.167	138.413	184.667	213.168	198.406	133.96	134.558	134.259	1.43343	1.43343	0.0010411	0.0290811
6838399	NM_011718 // Wnt10b // wingless related MMTV integration site 10b // 15 F1|15 56.8 cM /	Wnt10b	NM_011718	chr15	98601157	98620090	-	434.9	426.831	405.256	381.955	411.714	566.028	532.482	548.999	395.222	372.349	383.616	1.33344	1.33344	0.00104689	0.0290811
6967005	NM_027055 // Spaca4 // sperm acrosome associated 4 // 7 B4|7 // 69363 /// ENSMUST000000	Spaca4	NM_027055	chr7	52980261	52981173	-	300.054	313.263	324.44	318.595	313.958	401.251	416.364	408.737	328.575	297.008	312.393	1.30189	1.30189	0.00104799	0.0290811
6902618	ENSMUST00000044089 // Asb17 // ankyrin repeat and SOCS box-containing 17 // 3 H3|3 // 6	Asb17	ENSMUST00000044089	chr3	153425611	153516579	+	37.1819	41.3304	37.2537	36.0011	37.8896	49.8973	51.4065	50.6461	34.755	37.6326	36.1652	1.33668	1.33668	0.00105701	0.0290811
6931257	NM_031180 // Klb // klotho beta // 5 C3.1|5 // 83379 /// ENSMUST00000031096 // Klb // k	Klb	NM_031180	chr5	65739563	65775242	+	49.793	56.6467	64.2418	53.0724	55.6874	84.656	83.1538	83.9012	60.4324	52.9765	56.582	1.50665	1.50665	0.00105986	0.0290811
6769110	NM_147071 // Olfr1352 // olfactory receptor 1352 // 10 C1|10 // 259074 /// ENSMUST00000	Olfr1352	NM_147071	chr10	78443880	78447454	+	9.88609	11.949	13.7242	12.1447	11.8456	17.9935	22.5385	20.1382	13.9394	12.6628	13.2858	1.70005	1.70005	0.00106307	0.0290811
6924892	ENSMUST00000006565 // Cdc20 // cell division cycle 20 // 4 D2.1|4 // 107995 /// NM_0232	Cdc20	ENSMUST00000006565	chr4	118104521	118110188	-	1140.22	1237.23	1036.42	1237.92	1159.91	782.095	704.258	742.157	1010.28	1285.04	1139.43	0.63985	-1.56287	0.00106958	0.0290811
7015993	NM_013840 // Uxt // ubiquitously expressed transcript // X|X A2 // 22294 /// ENSMUST000	Uxt	NM_013840	chrX	20528791	20539211	-	479.614	406.069	423.868	474.006	444.762	301.286	312	306.597	425.442	499.905	461.172	0.689351	-1.45064	0.00107065	0.0290811
6850797	NM_025973 // Pgc // progastricsin (pepsinogen C) // 17 C|17 30.0 cM // 109820 /// ENSMU	Pgc	NM_025973	chr17	47863791	47872795	+	91.3904	92.1812	115.719	106.708	100.992	150.741	149.922	150.331	109.966	104.283	107.087	1.48855	1.48855	0.00108286	0.0290811
6992159	NM_031178 // Tlr9 // toll-like receptor 9 // 9 F1|9 // 81897 /// ENSMUST00000062241 //	Tlr9	NM_031178	chr9	106119426	106131924	+	239.727	214.15	251.403	223.266	231.69	303.777	324.578	314.004	241.854	240.096	240.973	1.35528	1.35528	0.00108289	0.0290811
6825086	NM_001004158 // Gm5142 // predicted gene 5142 // 14 C3|14 // 380907 /// ENSMUST00000066	Gm5142	NM_001004158	chr14	59777340	59797586	-	73.7131	63	79.1984	75.6344	72.6238	108.92	110.264	109.59	68.489	81.8483	74.8713	1.509	1.509	0.00109731	0.0290811
6782579	NM_026185 // Abhd15 // abhydrolase domain containing 15 // 11 B5|11 // 67477 /// ENSMUS	Abhd15	NM_026185	chr11	77328623	77352089	+	127.796	142.081	124.527	117.539	127.681	180.651	190.106	185.318	141.713	119.613	130.195	1.45142	1.45142	0.00110041	0.0290811
6978309	ENSMUST00000034218 // Slc12a3 // solute carrier family 12, member 3 // 8 C5|8 45.0 cM /	Slc12a3	ENSMUST00000034218	chr8	96853101	96903340	+	152.436	152.049	171.861	144.881	154.994	206.061	214.101	210.043	161.764	154.072	157.871	1.35517	1.35517	0.00110103	0.0290811
6960627	ENSMUST00000056442 // Slc6a5 // solute carrier family 6 (neurotransmitter transporter,	Slc6a5	ENSMUST00000056442	chr7	57149992	57536896	+	73.6197	77.5519	86.3695	74.5042	77.854	103.323	106.279	104.79	78.0275	79.5037	78.7621	1.34599	1.34599	0.00111271	0.0290811
6766372	ENSMUST00000116259 // Mtap7 // microtubule-associated protein 7 // 10 A3|10 11.0 cM //	Mtap7	ENSMUST00000116259	chr10	19868608	20001492	+	369.748	357.644	367.706	353.097	361.983	460.322	513.845	486.35	352.18	308.879	329.819	1.34357	1.34357	0.00112078	0.0290811
6962780	NM_177696 // Gdpd4 // glycerophosphodiester phosphodiesterase domain containing 4 // 7	Gdpd4	NM_177696	chr7	105063508	105198163	+	45.8224	46.8475	52.1361	46.7123	47.8173	66.2051	60.9388	63.5174	46.8732	46.3893	46.6308	1.32834	1.32834	0.00112485	0.0290811
6790199	NM_011329 // Ccl1 // chemokine (C-C motif) ligand 1 // 11 C|11 47.32 cM // 20290 /// EN	Ccl1	NM_011329	chr11	81990161	82119182	-	65.4649	64.8363	66.6286	55.9257	63.0629	91.5958	84.262	87.8524	67.4118	63.8706	65.6176	1.39309	1.39309	0.00113606	0.0290811
6982621	NM_175939 // Adam29 // a disintegrin and metallopeptidase domain 29 // 8 B2|8 // 244486	Adam29	NM_175939	chr8	58349709	58385749	-	27.9474	26.2594	26.095	27.7971	27.0113	33.5914	36.5014	35.0162	26.9219	28.4953	27.6974	1.29635	1.29635	0.00114027	0.0290811
6960142	ENSMUST00000004732 // Lim2 // lens intrinsic membrane protein 2 // 7 B4|7 2.0 cM // 233	Lim2	ENSMUST00000004732	chr7	50685468	50691361	+	118.044	116.582	120.839	114.531	117.477	150.753	150.006	150.379	121.245	109.448	115.195	1.28008	1.28008	0.00115262	0.0290811
6867782	ENSMUST00000052448 // Kcnk7 // potassium channel, subfamily K, member 7 // 19|19 B2 //	Kcnk7	ENSMUST00000052448	chr19	5704288	5707101	+	103.168	111.591	119.793	112.595	111.63	146.273	146.495	146.384	109.855	108.158	109.003	1.31133	1.31133	0.00115607	0.0290811
6963101	ENSMUST00000098201 // Olfr599 // olfactory receptor 599 // 7 E3|7 // 258726 /// NM_1467	Olfr599	ENSMUST00000098201	chr7	110486472	110487517	+	121.599	105.712	125.9	95.9965	111.644	164.597	176.242	170.32	121.529	118.621	120.067	1.52557	1.52557	0.00116488	0.0290811
6797577	NM_173024 // Serpina3b // serine (or cysteine) peptidase inhibitor, clade A, member 3B	Serpina3b	NM_173024	chr12	105366206	105377905	+	34.6204	29.4828	33.1852	31.0392	32.0213	42.2234	52.5195	47.0907	35.1936	34.3424	34.7654	1.47061	1.47061	0.00116776	0.0290811
6904297	NM_009673 // Anxa5 // annexin A5 // 3 B|3 19.2 cM // 11747 /// ENSMUST00000029266 // An	Anxa5	NM_009673	chr3	36322899	36406746	-	8041.78	7548.63	8047.92	7890.49	7879.56	5938.57	6366.13	6148.85	6968.83	7419.98	7190.62	0.780327	-1.28151	0.00116937	0.0290811
6754608	NM_010865 // Myoc // myocilin // 1 H2.1|1 83.6 cM // 17926 /// ENSMUST00000028020 // My	Myoc	NM_010865	chr1	164569268	164581467	+	55.8998	45.4951	53.26	50.8851	51.2379	68.9711	80.7287	74.6189	54.8166	52.5144	53.6531	1.45632	1.45632	0.00117097	0.0290811
6957178	ENSMUST00000042647 // Plekhg6 // pleckstrin homology domain containing, family G (with	Plekhg6	ENSMUST00000042647	chr6	125312669	125332752	-	234.81	222.862	241.936	224.299	230.845	306.164	403.306	351.393	231.356	205.347	217.965	1.52221	1.52221	0.00117411	0.0290811
6960144	ENSMUST00000070518 // Nkg7 // natural killer cell group 7 sequence // 7|7 B2 // 72310 /	Nkg7	ENSMUST00000070518	chr7	50692443	50693617	+	100.466	97.9688	92.505	84.3953	93.6262	123.57	147.947	135.211	110.455	108.443	109.445	1.44415	1.44415	0.00117505	0.0290811
6915228	NM_008333 // Ifna11 // interferon alpha 11 // 4 C4|4 42.6 cM // 15964 /// ENSMUST000001	Ifna11	NM_008333	chr4	88465797	88467279	+	16.239	12.6525	11.8197	12.4137	13.1768	23.7805	19.8451	21.7239	11.0705	11.0603	11.0654	1.64864	1.64864	0.00118415	0.0290811
6990438	NM_025890 // Khdc3 // KH domain containing 3, subcortical maternal complex member // 9	Khdc3	NM_025890	chr9	72950268	73011020	+	139.027	137.307	153.835	119.084	136.748	193.039	213.769	203.14	137.647	150.537	143.948	1.48549	1.48549	0.00118712	0.0290811
6837435	NM_001170954 // A4galt // alpha 1,4-galactosyltransferase // 15 E1|15 // 239559 /// ENS	A4galt	NM_001170954	chr15	83057159	83082184	-	131.151	133.839	147.1	122.878	133.462	197.279	177.478	187.117	134.733	122.454	128.447	1.40202	1.40202	0.00118863	0.0290811
7005516	ENSMUST00000096691 // Il22 // interleukin 22 // 10 D2|10 67.0 cM // 50929 /// NM_016971	Il22	ENSMUST00000096691	chr10	117639241	117647093	+	67.4983	77.4869	84.5786	64.2293	73.0094	129.505	122.341	125.872	98.5771	72.9886	84.8234	1.72405	1.72405	0.00118937	0.0290811
6767159	BC112909 // 5930403N24Rik // RIKEN cDNA 5930403N24 gene // 10 B1|10 // 320504	5930403N24Rik	BC112909	chr10	36859364	36897958	+	232.597	255.378	261.144	240.606	247.168	315.134	336.889	325.829	282.103	264.71	273.269	1.31825	1.31825	0.00119418	0.0290811
6935519	NM_019792 // Cyp3a25 // cytochrome P450, family 3, subfamily a, polypeptide 25 // 5 G3|	Cyp3a25	NM_019792	chr5	146882482	147009550	+	26.5314	27.072	25.3327	30.6459	27.3265	38.5618	46.4846	42.3383	36.9423	30.4316	33.5293	1.54935	1.54935	0.00121589	0.0290811
6979691	NM_194446 // Cdk10 // cyclin-dependent kinase 10 // 8 E1|8 // 234854 /// ENSMUST0000003	Cdk10	NM_194446	chr8	125748656	125766838	+	514.205	515.761	407.117	510.77	484.6	326.665	327.091	326.878	521.513	554.345	537.679	0.674534	-1.48251	0.00121662	0.0290811
7011402	NM_009766 // Brs3 // bombesin-like receptor 3 // X|X A7.1-A7.2 // 12209 /// ENSMUST0000	Brs3	NM_009766	chrX	54296251	54301935	+	87.7185	101.942	115.733	95.8389	99.7953	149.073	151.457	150.26	102.174	114.282	108.059	1.50568	1.50568	0.00121838	0.0290811
6926392	NM_153106 // Padi6 // peptidyl arginine deiminase, type VI // 4 E1|4 71.0 cM // 242726	Padi6	NM_153106	chr4	140283273	140298553	-	58.6452	55.8161	62.3138	52.8734	57.3066	76.6317	80.2094	78.3999	61.4742	55.4117	58.3641	1.36809	1.36809	0.00121927	0.0290811
6780778	AK045150 // B130040O20Rik // RIKEN cDNA B130040O20 gene // 11 B1.3|11 // 320962 /// AK0	B130040O20Rik	AK045150	chr11	49877366	49880904	+	297.196	288.107	297.728	296.77	294.922	239.259	228.497	233.816	286.035	308.227	296.924	0.792804	-1.26135	0.00122343	0.0290811
6946013	NM_173429 // Zfp775 // zinc finger protein 775 // 6 B2.3|6 // 243372 /// ENSMUST0000006	Zfp775	NM_173429	chr6	48551631	48573228	+	203.666	189.034	211.74	177.284	194.977	267.943	275.142	271.517	205.817	183.702	194.445	1.39257	1.39257	0.00122664	0.0290811
6917656	ENSMUST00000081525 // Paqr7 // progestin and adipoQ receptor family member VII // 4 D3|	Paqr7	ENSMUST00000081525	chr4	134043185	134064883	+	316.873	352.148	378.24	312.525	338.896	566.963	510.264	537.869	411.084	316.381	360.636	1.58712	1.58712	0.00122696	0.0290811
6803216	ENSMUST00000044231 // Serpina10 // serine (or cysteine) peptidase inhibitor, clade A (a	Serpina10	ENSMUST00000044231	chr12	104851375	104869671	-	110.199	93.5568	110.416	108.586	105.442	144.758	157.099	150.802	124	107.742	115.586	1.43019	1.43019	0.00123006	0.0290811
6892486	ENSMUST00000109561 // Sla2 // Src-like-adaptor 2 // 2 H1|2 // 77799 /// NM_029983 // Sl	Sla2	ENSMUST00000109561	chr2	156697684	156712937	-	230.174	215.317	238.048	219.272	225.526	284.661	337.106	309.776	233.882	220.802	227.247	1.37357	1.37357	0.00123097	0.0290811
6775472	NM_010304 // Gna15 // guanine nucleotide binding protein, alpha 15 // 10 C1|10 43.0 cM	Gna15	NM_010304	chr10	80965061	80987066	-	210.105	195.146	209.96	182.66	199.133	269.774	275.382	272.564	192.78	170.312	181.199	1.36875	1.36875	0.001235	0.0290811
6899100	NR_045997 // 1700113A16Rik // RIKEN cDNA 1700113A16 gene // 3|3 // 76642 /// ENSMUST000	1700113A16Rik	NR_045997	chr3	87975877	87975963	+	428.503	384.279	302.668	393.211	374.152	185.717	174.698	180.123	335.693	544.678	427.604	0.481417	-2.0772	0.00123801	0.0290811
6752425	ENSMUST00000027629 // Tfcp2l1 // transcription factor CP2-like 1 // 1|1 E2 // 81879 ///	Tfcp2l1	ENSMUST00000027629	chr1	120524515	120655075	+	203.332	179.588	210.699	206.709	199.699	261.164	301.255	280.493	198.748	211.705	205.125	1.40458	1.40458	0.00124018	0.0290811
6776873	AK086086 // A830054O04Rik // RIKEN cDNA A830054O04 gene // 10 D1|10 // 320491 /// AK086	A830054O04Rik	AK086086	chr10	107983638	107984973	-	88.3777	74.1395	73.7229	86.0934	80.3046	111.306	121.044	116.073	75.1255	82.4033	78.6803	1.44541	1.44541	0.00124132	0.0290811
6807201	NM_153131 // Unc5a // unc-5 homolog A (C. elegans) // 13 B1|13 // 107448 /// ENSMUST000	Unc5a	NM_153131	chr13	55050782	55107379	+	443.992	409.594	458.895	435.805	436.7	551.815	670.791	608.402	433.693	431.19	432.441	1.39318	1.39318	0.00125185	0.0290811
6796544	NM_001205343 // Papln // papilin, proteoglycan-like sulfated glycoprotein // 12 D1|12 /	Papln	NM_001205343	chr12	85081741	85136604	+	543.844	539.788	544.338	525.957	538.432	651.409	706.008	678.159	548.668	531.859	540.196	1.25951	1.25951	0.0012535	0.0290811
6803917	NM_010588 // Jag2 // jagged 2 // 12 F1|12 57.9 cM // 16450 /// ENSMUST00000075827 // Ja	Jag2	NM_010588	chr12	114143168	114168066	-	862.069	891.438	802.501	827.021	845.083	1075.95	1165.15	1119.63	864.061	783.772	822.938	1.32492	1.32492	0.00125553	0.0290811
6904330	NM_145825 // Cetn4 // centrin 4 // 3 B|3 // 207175 /// ENSMUST00000102955 // Cetn4 // c	Cetn4	NM_145825	chr3	37206681	37211654	-	35.8303	35.1533	38.6284	48.7743	39.2489	20.9949	25.5796	23.1742	41.5086	38.9049	40.1857	0.590439	-1.69365	0.00126053	0.0290811
6891210	ENSMUST00000028704 // Hao1 // hydroxyacid oxidase 1, liver // 2 F2|2 80.0 cM // 15112 /	Hao1	ENSMUST00000028704	chr2	134323097	134380101	-	38.0304	42.3277	41.3338	38.4225	39.9865	51.9215	54.7334	53.3087	41.3754	37.1122	39.1858	1.33318	1.33318	0.00126667	0.0290811
7017029	ENSMUST00000114766 // Mtap7d3 // MAP7 domain containing 3 // X A5|X // 320923 /// NM_17	Mtap7d3	ENSMUST00000114766	chrX	54049856	54087639	-	484.197	434.445	453.07	460.887	457.802	348.231	335.04	341.573	421.421	485.965	452.546	0.74611	-1.34029	0.00126891	0.0290811
6899862	NM_027665 // Adam30 // a disintegrin and metallopeptidase domain 30 // 3|3 F3 // 71078	Adam30	NM_027665	chr3	97964577	97997918	+	52.4231	52.1419	53.817	53.3853	52.9376	68.0951	74.5946	71.2708	43.957	51.6996	47.6713	1.34632	1.34632	0.00127324	0.0290811
6830480	NM_178920 // Mal2 // mal, T cell differentiation protein 2 // 15 D1|15 // 105853 /// EN	Mal2	NM_178920	chr15	54402765	54434397	+	1056.66	1042.33	999.768	1031.91	1032.48	575.623	791.064	674.797	929.448	887.523	908.246	0.653588	-1.53002	0.00128178	0.0290811
6985813	NM_025734 // Kcng4 // potassium voltage-gated channel, subfamily G, member 4 // 8 E1|8	Kcng4	NM_025734	chr8	122147754	122169909	-	181.262	210.75	210.323	164.376	190.634	288.309	279.478	283.859	193.837	196.262	195.046	1.48903	1.48903	0.00128423	0.0290811
6831511	NM_174991 // Bai1 // brain-specific angiogenesis inhibitor 1 // 15 D3|15 // 107831 ///	Bai1	NM_174991	chr15	74282031	74419895	+	341.836	321.907	351.4	310.726	331.079	417.279	455.327	435.89	321.758	318.39	320.069	1.31657	1.31657	0.00128971	0.0290811
6849416	ENSMUST00000041641 // Solh // small optic lobes homolog (Drosophila) // 17|17 A3 // 508	Solh	ENSMUST00000041641	chr17	26088417	26100555	+	197.287	194.325	213.059	191.929	198.983	248.915	266.89	257.745	193.316	201.874	197.549	1.29531	1.29531	0.00129655	0.0290811
6989925	NM_016688 // Pdcd7 // programmed cell death 7 // 9|9 D // 50996 /// ENSMUST00000048184	Pdcd7	NM_016688	chr9	65193875	65207443	+	329.759	351.746	331.798	342.154	338.751	424.785	418.847	421.807	354.59	354.298	354.443	1.24518	1.24518	0.00129821	0.0290811
6998121	NM_030219 // Trim42 // tripartite motif-containing 42 // 9|9 E4 // 78911 /// ENSMUST000	Trim42	NM_030219	chr9	97249985	97270437	-	107.288	103.627	110.444	98.3362	104.826	146.264	131.273	138.566	111.521	106.918	109.195	1.32187	1.32187	0.00130479	0.0290811
6791326	ENSMUST00000038004 // Krt25 // keratin 25 // 11 D|11 // 70810 /// NM_133730 // Krt25 //	Krt25	ENSMUST00000038004	chr11	99176850	99189146	-	94.9141	100.486	100.421	81.6732	94.045	135.404	136.399	135.901	100.554	88.8568	94.5247	1.44506	1.44506	0.00130687	0.0290811
6979073	NM_146214 // Tat // tyrosine aminotransferase // 8 D3|8 55.2 cM // 234724 /// ENSMUST00	Tat	NM_146214	chr8	112514349	112523701	+	86.8347	87.8171	97.063	81.7972	88.21	114.12	134.491	123.888	89.1653	88.366	88.7644	1.40447	1.40447	0.00130931	0.0290811
6956964	NM_033567 // Cecr6 // cat eye syndrome chromosome region, candidate 6 // 6 F1|6 54.0 cM	Cecr6	NM_033567	chr6	120438967	120444249	-	445.077	453.343	505.781	456.168	464.502	627.338	591.728	609.275	454.309	435.027	444.565	1.31167	1.31167	0.0013127	0.0290811
6880084	NM_029232 // Tmco5b // transmembrane and coiled-coil domains 5B // 2 E4|2 // 75275 ///	Tmco5b	NM_029232	chr2	113122227	113137347	+	46.3417	43.8228	45.9088	42.3353	44.5724	57.167	58.8912	58.0229	40.366	44.7529	42.5029	1.30176	1.30176	0.00131396	0.0290811
6785434	NM_145363 // Tspan10 // tetraspanin 10 // 11 E2|11 // 208634 /// ENSMUST00000044105 //	Tspan10	NM_145363	chr11	120303965	120308614	+	229.689	205.242	234.022	219.046	221.718	282.904	313.647	297.881	233.955	218.659	226.179	1.34351	1.34351	0.00131522	0.0290811
6767402	NM_001013370 // Sesn1 // sestrin 1 // 10 B2|10 25.0 cM // 140742 /// ENSMUST00000041438	Sesn1	NM_001013370	chr10	41529754	41629369	+	1051.69	996.855	1025.21	1077	1037.22	1387.53	1316.51	1351.55	1156.94	1031.41	1092.34	1.303	1.303	0.00131551	0.0290811
6869783	NM_020033 // Ankrd2 // ankyrin repeat domain 2 (stretch responsive muscle) // 19|19 D1	Ankrd2	NM_020033	chr19	42110166	42119600	+	273.783	257.986	255.323	216.291	249.909	351.912	470.646	406.973	260.289	280.67	270.287	1.62848	1.62848	0.00131589	0.0290811
6759658	NM_176980 // Ankar // ankyrin and armadillo repeat containing // 1 C3|1 // 319695 /// E	Ankar	NM_176980	chr1	72689581	72747143	-	33.3402	32.9348	33.2336	33.0139	33.1303	39.772	43.8654	41.7687	31.801	31.2809	31.5398	1.26074	1.26074	0.00132025	0.0290811
6983097	NM_153054 // Slc18a1 // solute carrier family 18 (vesicular monoamine), member 1 // 8 B	Slc18a1	NM_153054	chr8	71507714	71613114	-	95.2192	95.8815	104.116	95.9533	97.726	120.65	131.646	126.029	104.742	103.256	103.996	1.28961	1.28961	0.00132415	0.0290811
6960164	NM_028236 // Ceacam18 // carcinoembryonic antigen-related cell adhesion molecule 18 //	Ceacam18	NM_028236	chr7	50879059	50904655	+	80.5722	91.6619	97.947	77.8805	86.6363	123.474	143.02	132.887	87.8201	100.613	93.9994	1.53386	1.53386	0.0013262	0.0290811
6950263	NM_207018 // Tas2r113 // taste receptor, type 2, member 113 // 6 G1|6 63.5 cM // 387345	Tas2r113	NM_207018	chr6	132843029	132843958	+	157.1	143.818	142.485	130.286	143.108	189.22	238	212.213	154.996	150.549	152.757	1.48289	1.48289	0.00133192	0.0290811
6895997	ENSMUST00000118735 // Dnajc5b // DnaJ (Hsp40) homolog, subfamily C, member 5 beta // 3|	Dnajc5b	ENSMUST00000118735	chr3	19408615	19510862	+	52.9489	51.1939	48.84	46.8875	49.9146	65.474	66.7197	66.0937	57.8386	64.6124	61.1318	1.32414	1.32414	0.00133495	0.0290811
6925149	NM_029662 // Mfsd2a // major facilitator superfamily domain containing 2A // 4|4 D1 //	Mfsd2a	NM_029662	chr4	122623712	122638430	-	440.528	458.364	449.289	402.086	437.024	581.349	643.854	611.806	380.948	447.248	412.769	1.39993	1.39993	0.00133882	0.0290811
6860411	ENSMUST00000072008 // Sh3rf2 // SH3 domain containing ring finger 2 // 18 B3|18 // 2690	Sh3rf2	ENSMUST00000072008	chr18	42213321	42319421	+	770.195	806.947	700.116	807.798	769.982	1046.24	1090.97	1068.37	844.17	725.197	782.426	1.38753	1.38753	0.00134928	0.0290811
6988350	NM_146613 // Olfr229 // olfactory receptor 229 // 9 A5-B|9 // 258606 /// ENSMUST0000007	Olfr229	NM_146613	chr9	39717390	39718289	+	13.0416	16.9415	16.6965	16.3583	15.6733	23.1595	24.0598	23.6053	15.903	14.7197	15.2999	1.50608	1.50608	0.00134943	0.0290811
6952149	NM_207022 // Tas2r118 // taste receptor, type 2, member 118 // 6 A3.1|6 // 387347 /// E	Tas2r118	NM_207022	chr6	23919161	23940990	-	32.9314	31.7776	31.4137	27.792	30.9166	41.9704	40.7269	41.3441	32.2811	31.4402	31.8579	1.33727	1.33727	0.00135266	0.0290811
6940955	NM_001104621 // Vmn2r9 // vomeronasal 2, receptor 9 // 5 F|5 // 435864 /// ENSMUST00000	Vmn2r9	NM_001104621	chr5	109226212	109726575	-	18.7295	18.044	19.7629	18.0823	18.6419	31.3217	24.1227	27.4874	17.0776	18.5369	17.7923	1.4745	1.4745	0.0013531	0.0290811
6957356	NM_010737 // Klrb1a // killer cell lectin-like receptor subfamily B member 1A // 6 F3|6	Klrb1a	NM_010737	chr6	128559247	128572942	-	34.3355	39.2163	39.0124	32.3955	36.1181	48.8921	59.7278	54.039	36.8221	36.0356	36.4266	1.49618	1.49618	0.00135375	0.0290811
6988147	NM_007391 // Acrv1 // acrosomal vesicle protein 1 // 9 A4|9 17.0 cM // 11451 /// ENSMUS	Acrv1	NM_007391	chr9	36394685	36512262	+	42.0878	37.7538	46.8124	39.2312	41.3312	66.9351	55.8467	61.1402	44.3819	46.1318	45.2482	1.47927	1.47927	0.00135551	0.0290811
6980694	NR_037972 // BB014433 // expressed sequence BB014433 // 8 A1.1|8 // 434285 /// NR_03797	BB014433	NR_037972	chr8	15041447	15046164	-	75.5045	72.0177	78.7621	68.6044	73.6243	98.4023	131.055	113.561	87.3388	78.525	82.815	1.54244	1.54244	0.00135987	0.0290811
6933390	NM_207279 // Plcxd1 // phosphatidylinositol-specific phospholipase C, X domain containi	Plcxd1	NM_207279	chr5	110470522	110535079	+	275.384	273.097	285.471	268	275.414	335.526	351.295	343.32	254.124	257.756	255.933	1.24655	1.24655	0.00136082	0.0290811
6815551	NM_025369 // Mrps36 // mitochondrial ribosomal protein S36 // 13 D1|13 // 66128 /// NM_	Mrps36	NM_025369	chr13	101505372	101514576	-	555.287	534.461	639.429	545.592	567.25	763.217	816.755	789.535	566.177	513.66	539.28	1.39186	1.39186	0.00136253	0.0290811
6892811	BC025862 // 0610008F07Rik // RIKEN cDNA 0610008F07 gene // 2 H2-H3|2 // 68314 /// BC025	0610008F07Rik	BC025862	chr2	163319546	163367447	-	103.983	117.927	130.327	116.475	116.805	162.201	162.417	162.309	119.889	125.002	122.419	1.38958	1.38958	0.00136417	0.0290811
6883654	ENSMUST00000029017 // Pck1 // phosphoenolpyruvate carboxykinase 1, cytosolic // 2 C1-qt	Pck1	ENSMUST00000029017	chr2	172976273	172991180	+	139.763	143.238	151.585	128.296	140.468	193.998	206.539	200.17	136.697	113.786	124.717	1.42502	1.42502	0.00136613	0.0290811
6760740	NM_172850 // Ankmy1 // ankyrin repeat and MYND domain containing 1 // 1 D|1 // 241158 /	Ankmy1	NM_172850	chr1	94757771	94799473	-	133.262	129.643	150.25	136.366	137.165	180.647	179.633	180.139	135.166	129.467	132.285	1.3133	1.3133	0.00136631	0.0290811
6813480	NM_019568 // Cxcl14 // chemokine (C-X-C motif) ligand 14 // 13 B1|13 // 57266 /// ENSMU	Cxcl14	NM_019568	chr13	56361945	56398084	-	281.972	293.123	323.316	367.515	314.804	476.39	472.788	474.584	365.665	321.862	343.065	1.50756	1.50756	0.00137199	0.0290811
6858842	NM_010258 // Gata6 // GATA binding protein 6 // 18 A1|18 3.0 cM // 14465 /// ENSMUST000	Gata6	NM_010258	chr18	11050544	11086583	+	370.228	405.88	448.126	393.593	403.485	538.003	561.378	549.566	496.073	467.998	481.83	1.36205	1.36205	0.00137905	0.0290811
6755266	NM_146881 // Olfr1404 // olfactory receptor 1404 // 1 H3|1 // 258881 /// ENSMUST0000005	Olfr1404	NM_146881	chr1	175145784	175146725	+	22.8826	25.8953	26.4272	27.2785	25.5652	33.2569	38.1894	35.6379	27.8588	27.351	27.6037	1.394	1.394	0.00138112	0.0290811
6966215	NM_029714 // Catsperg2 // cation channel, sperm-associated, gamma 2 // 7 B1|7 // 76718	Catsperg2	NM_029714	chr7	30466880	30512051	-	65.4781	64.0755	74.7266	70.7128	68.6182	91.9897	96.624	94.278	67.4095	59.6124	63.3912	1.37395	1.37395	0.00138226	0.0290811
6907648	NM_172295 // Mab21l3 // mab-21-like 3 (C. elegans) // 3 F2.2|3 // 242125 /// ENSMUST000	Mab21l3	NM_172295	chr3	101511320	101648389	-	343.332	392.324	339.199	370.359	360.669	470.053	487.156	478.528	368.099	385.287	376.595	1.32678	1.32678	0.00138588	0.0290811
6755247	NM_177723 // Vsig8 // V-set and immunoglobulin domain containing 8 // 1 H3|1 // 240916	Vsig8	NM_177723	chr1	174486069	174513273	+	245.269	267.564	291.326	261.905	266.011	349.789	365.561	357.589	269.307	250.706	259.84	1.34427	1.34427	0.00139141	0.0290811
6947718	NM_001159697 // Ccdc48 // coiled-coil domain containing 48 // 6|6 D2 // 58229 /// ENSMU	Ccdc48	NM_001159697	chr6	87680887	87701899	+	164.055	155.838	166.013	156.146	160.448	212.568	224.93	218.662	167.042	138.844	152.291	1.36282	1.36282	0.00139368	0.0290811
6835454	NM_026200 // Kcnv1 // potassium channel, subfamily V, member 1 // 15|15 D1 // 67498 ///	Kcnv1	NM_026200	chr15	44937830	44946506	-	219.587	192.443	185.31	185.079	195.116	255.456	289.059	271.738	204.574	200.958	202.757	1.39271	1.39271	0.00139445	0.0290811
6910648	ENSMUST00000044278 // St6galnac5 // ST6 (alpha-N-acetyl-neuraminyl-2,3-beta-galactosyl-	St6galnac5	ENSMUST00000044278	chr3	152464543	152645200	-	273.277	289.237	286.842	275.317	281.083	343.722	363.361	353.405	293.782	281.316	287.482	1.2573	1.2573	0.00139568	0.0290811
6919300	NM_020021 // Mos // Moloney sarcoma oncogene // 4 A1-A2|4 0.0 cM // 17451 /// ENSMUST00	Mos	NM_020021	chr4	3796674	3803171	-	169.307	220.22	211.878	211.42	202.158	287.865	347.577	316.315	175.342	187.844	181.485	1.56469	1.56469	0.00140305	0.0290811
6942562	NM_010571 // Irs3 // insulin receptor substrate 3 // 5 G2|5 // 16369 /// ENSMUST0000005	Irs3	NM_010571	chr5	138084260	138086942	-	113.111	122.29	128.276	111.382	118.567	155.16	165.084	160.046	127.054	115.479	121.128	1.34983	1.34983	0.00140687	0.0290811
6949617	NM_008645 // Mug1 // murinoglobulin 1 // 6 F1|6 // 17836 /// ENSMUST00000032228 // Mug1	Mug1	NM_008645	chr6	121682952	121927478	+	43.2372	47.6452	46.7622	44.2504	45.4384	57.3102	62.3099	59.758	42.7618	46.8404	44.7548	1.31514	1.31514	0.00140721	0.0290811
6929663	NM_053085 // Tcf23 // transcription factor 23 // 5 B1|5 // 69852 /// ENSMUST00000006818	Tcf23	NM_053085	chr5	31267856	31289677	+	85.6422	83.3899	101.035	90.0697	89.7867	119.986	140.174	129.688	94.6867	86.7565	90.6352	1.44439	1.44439	0.00140785	0.0290811
6791641	NM_001131020 // Gfap // glial fibrillary acidic protein // 11 D|11 62.0 cM // 14580 ///	Gfap	NM_001131020	chr11	102748656	102762609	-	132.238	128.864	149.754	125.392	133.747	187.316	175.71	181.42	128.769	132.848	130.792	1.35644	1.35644	0.00141345	0.0290811
6919064	NM_001162977 // Megf6 // multiple EGF-like-domains 6 // 4 E2|4 // 230971 /// ENSMUST000	Megf6	NM_001162977	chr4	153544844	153650669	+	760.846	771.114	730.93	846.356	776.176	1079.39	1138.96	1108.74	955.83	776.811	861.687	1.42851	1.42851	0.0014148	0.0290811
6959267	ENSMUST00000068767 // Nlrp4a // NLR family, pyrin domain containing 4A // 7 A3|7 // 243	Nlrp4a	ENSMUST00000068767	chr7	27220132	27261141	+	19.4056	19.2222	20.2812	17.419	19.0529	25.8883	24.348	25.1063	19.4533	19.1367	19.2943	1.31772	1.31772	0.00141544	0.0290811
6824166	NM_009160 // Sftpd // surfactant associated protein D // 14 B|14 14.0 cM // 20390 /// E	Sftpd	NM_009160	chr14	41985496	42032860	-	114.316	120.706	138.703	107.515	119.77	166.894	185.721	176.056	125.259	118.094	121.624	1.46995	1.46995	0.00141652	0.0290811
7012843	NM_023608 // Gdpd2 // glycerophosphodiester phosphodiesterase domain containing 2 // X|	Gdpd2	NM_023608	chrX	97924146	97934457	+	191.374	180.227	211.919	158.077	184.367	277.543	367.803	319.502	200.006	164.392	181.327	1.73296	1.73296	0.00142694	0.0290811
6774238	NM_010959 // Oit3 // oncoprotein induced transcript 3 // 10|10 B3 // 18302 /// ENSMUST0	Oit3	NM_010959	chr10	58885708	58904627	-	118.715	125.844	130.59	124.998	124.965	154.404	164.608	159.425	121.664	127.637	124.615	1.27576	1.27576	0.00142744	0.0290811
6850688	NM_207666 // Dlk2 // delta-like 2 homolog (Drosophila) // 17 C|17 // 106565 /// ENSMUST	Dlk2	NM_207666	chr17	46434291	46440220	+	489.22	473.152	481.786	469.236	478.286	582.926	668.596	624.293	496.934	466.619	481.539	1.30527	1.30527	0.00142768	0.0290811
6886097	NM_146950 // Olfr341 // olfactory receptor 341 // 2 C1|2 // 258952 /// ENSMUST000001001	Olfr341	NM_146950	chr2	36326101	36358489	-	134.118	112.533	113.187	121.755	120.091	251.128	169.08	206.06	127.289	133.943	130.574	1.71585	1.71585	0.00143052	0.0290811
6971321	NM_026918 // Zg16 // zymogen granule protein 16 // 7|7 F4 // 69036 /// ENSMUST000000511	Zg16	NM_026918	chr7	134193677	134231233	-	47.3378	47.3174	53.892	47.4827	48.9294	62.689	67.8704	65.2285	46.9554	44.461	45.6911	1.3331	1.3331	0.0014335	0.0290811
6768933	NM_080845 // Ftcd // formiminotransferase cyclodeaminase // 10 C1|10 41.3 cM // 14317 /	Ftcd	NM_080845	chr10	76038227	76052304	+	179.769	196.488	224.243	188.654	196.611	273.303	273.812	273.557	198.997	205.618	202.28	1.39136	1.39136	0.00143417	0.0290811
6971219	NR_045803 // 4933440M02Rik // RIKEN cDNA 4933440M02 gene // 7 F3|7 // 71208 /// NR_0458	4933440M02Rik	NR_045803	chr7	132427498	132493292	-	68.8703	70.6305	83.0714	66.5326	72.0072	105.679	99.419	102.501	72.5377	67.2028	69.8191	1.42348	1.42348	0.00144172	0.0291568
6846712	NM_008310 // Htr1f // 5-hydroxytryptamine (serotonin) receptor 1F // 16 C1.3|16 38.8 cM	Htr1f	NM_008310	chr16	64924555	65195872	-	116.245	108.999	127.484	109.109	115.22	149.274	160.444	154.758	110.357	108.886	109.619	1.34316	1.34316	0.00146142	0.0294268
6875721	NM_013524 // Fut7 // fucosyltransferase 7 // 2 A3|2 // 14347 /// ENSMUST00000041654 //	Fut7	NM_013524	chr2	25278784	25281891	+	63.1644	70.73	69.8089	64.334	66.9276	86.5595	111.319	98.1618	69.7108	66.0026	67.8313	1.46668	1.46668	0.00146559	0.0294268
6994688	NM_001164767 // Robo3 // roundabout homolog 3 (Drosophila) // 9|9 B // 19649 /// NM_001	Robo3	NM_001164767	chr9	37223264	37268128	-	156.946	143.637	156.259	144.683	150.252	189.542	197.611	193.535	159.442	149.212	154.242	1.28807	1.28807	0.00146998	0.0294268
6755163	NM_009803 // Nr1i3 // nuclear receptor subfamily 1, group I, member 3 // 1 H3|1 92.6 cM	Nr1i3	NM_009803	chr1	173122612	173149661	+	82.9075	81.2485	92.1058	79.5665	83.8216	107.115	114.011	110.51	90.2741	88.2289	89.2457	1.31839	1.31839	0.00147286	0.0294268
6757120	ENSMUST00000054668 // Stau2 // staufen (RNA binding protein) homolog 2 (Drosophila) //	Stau2	ENSMUST00000054668	chr1	16218775	16510193	-	911.355	806.343	850.938	895.413	865.032	682.223	651.671	666.772	830.669	789.3	809.72	0.770806	-1.29734	0.0014769	0.0294268
6963131	NM_147056 // Olfr646 // olfactory receptor 646 // 7 E3|7 // 259058 /// ENSMUST000000981	Olfr646	NM_147056	chr7	111254730	111255733	+	185.018	190.45	207.744	200.984	195.849	246.409	271.606	258.701	179.399	192.429	185.8	1.32092	1.32092	0.00147816	0.0294268
6787099	NM_001134458 // Il9r // interleukin 9 receptor // 11|11 A4 // 16199 /// NM_008374 // Il	Il9r	NM_001134458	chr11	32087560	32100261	-	143.723	150.312	147.457	135.884	144.241	183.741	189.108	186.405	148.501	134.903	141.539	1.29232	1.29232	0.00149583	0.0295638
6760417	ENSMUST00000161002 // Ecel1 // endothelin converting enzyme-like 1 // 1 D|1 // 13599 //	Ecel1	ENSMUST00000161002	chr1	89039384	89053076	-	142.896	138.213	147.367	124.804	138.054	177.403	201.998	189.301	132.677	129.17	130.912	1.37122	1.37122	0.00149739	0.0295638
6899366	NM_011310 // S100a3 // S100 calcium binding protein A3 // 3 F1-F2|3 43.6 cM // 20197 //	S100a3	NM_011310	chr3	90388602	90406624	+	75.1072	70.097	78.4613	74.8261	74.5626	98.5183	109.577	103.901	75.8533	63.2604	69.2715	1.39346	1.39346	0.00149822	0.0295638
6901944	NM_153564 // Gbp5 // guanylate binding protein 5 // 3 H1|3 // 229898 /// ENSMUST0000009	Gbp5	NM_153564	chr3	142156952	142185307	+	53.2973	51.8888	54.6125	50.5742	52.5715	66.3305	72.8936	69.5346	54.3847	47.8999	51.0394	1.32267	1.32267	0.00150081	0.0295638
6916101	NM_172873 // Cdcp2 // CUB domain containing protein 2 // 4 C7|4 // 242603 /// ENSMUST00	Cdcp2	NM_172873	chr4	106769496	106785726	+	142.898	166.885	179.549	153.527	160.122	221.213	227.098	224.136	174.474	173.989	174.231	1.39978	1.39978	0.00150438	0.0295638
6843130	NM_029844 // Mrap // melanocortin 2 receptor accessory protein // 16 C3.3|16 // 77037 /	Mrap	NM_029844	chr16	90735918	90751381	+	126.473	123.908	131.947	117.125	124.749	165.042	161.431	163.226	128.735	115.468	121.921	1.30844	1.30844	0.00151282	0.0296534
6946968	NM_147779 // Sftpb // surfactant associated protein B // 6 C1|6 31.0 cM // 20388 /// EN	Sftpb	NM_147779	chr6	72212122	72267925	+	184.783	194.36	181.678	179.874	185.091	251.132	239.849	245.425	211.198	180.993	195.513	1.32597	1.32597	0.00151936	0.0297053
6921557	NM_007519 // Baat // bile acid-Coenzyme A: amino acid N-acyltransferase // 4 B1|4 22.7	Baat	NM_007519	chr4	49502294	49519410	-	46.7239	44.2922	46.3109	46.0264	45.8287	56.0806	57.2062	56.6408	45.4419	47.1341	46.2804	1.23592	1.23592	0.00152897	0.029817
6789652	NM_146709 // Olfr411 // olfactory receptor 411 // 11 B4|11 // 258704 /// ENSMUST0000005	Olfr411	NM_146709	chr11	74160167	74166099	-	161.857	119.239	108.228	106.593	122.153	230.52	226.758	228.631	146.922	114.618	129.769	1.87168	1.87168	0.00154513	0.0300189
6939979	NM_011148 // Ppef2 // protein phosphatase, EF hand calcium-binding domain 2 // 5|5 E3 /	Ppef2	NM_011148	chr5	92655297	92685300	-	124.918	123.559	139.788	119.709	126.773	165.249	166.656	165.952	124.836	123.137	123.984	1.30905	1.30905	0.00154717	0.0300189
6856288	NM_019418 // Tnfsf14 // tumor necrosis factor (ligand) superfamily, member 14 // 17|17	Tnfsf14	NM_019418	chr17	57328893	57333844	-	99.4693	108.089	127.294	108.97	110.508	156.965	156.993	156.979	119.104	110.522	114.732	1.42052	1.42052	0.00155709	0.0300794
6868845	NM_145831 // Dmrt2 // doublesex and mab-3 related transcription factor 2 // 19 C1|19 //	Dmrt2	NM_145831	chr19	25724915	25753481	+	1487.32	1640.36	1398.92	1380.14	1473.16	1115.06	1077.97	1096.36	1424.95	1483.61	1453.99	0.744194	-1.34374	0.00156187	0.0300794
6838365	NM_027304 // H1fnt // H1 histone family, member N, testis-specific // 15 F1|15 // 70069	H1fnt	NM_027304	chr15	98078622	98087821	-	102.24	107.935	113.124	111.292	108.568	140.838	147.309	144.037	109.221	125.821	117.228	1.3267	1.3267	0.00156287	0.0300794
6959273	NM_007814 // Cyp2b19 // cytochrome P450, family 2, subfamily b, polypeptide 19 // 7 A3|	Cyp2b19	NM_007814	chr7	27523483	27557649	+	81.1382	75.0474	84.7646	76.2809	79.2133	100.201	103.353	101.765	78.6912	78.6198	78.6557	1.2847	1.2847	0.00156603	0.0300794
6780816	NM_173372 // Grm6 // glutamate receptor, metabotropic 6 // 11 B1.3|11 // 108072 /// ENS	Grm6	NM_173372	chr11	50651480	50679705	+	162.265	166.357	166.939	137.783	157.854	216.444	228.777	222.526	175.056	157.084	165.826	1.40969	1.40969	0.00157108	0.0300798
6949789	NM_181344 // C1rl // complement component 1, r subcomponent-like // 6 F2|6 // 232371 //	C1rl	NM_181344	chr6	124443105	124517435	+	187.666	191.504	213.738	215.101	201.614	262.132	274.034	268.017	220.482	210.244	215.302	1.32935	1.32935	0.00157392	0.0300798
6884173	NM_018766 // Ntsr1 // neurotensin receptor 1 // 2 H1-H4|2 107.0 cM // 18216 /// ENSMUST	Ntsr1	NM_018766	chr2	180234598	180279684	+	144.97	176.271	177.194	151.434	161.82	230.271	225.734	227.991	164.979	168.57	166.765	1.40892	1.40892	0.00157947	0.0301106
6791387	NM_027563 // Krt34 // keratin 34 // 11 D|11 58.3 cM // 16672 /// ENSMUST00000056362 //	Krt34	NM_027563	chr11	99898666	99902955	-	147.291	167.708	160.93	146.962	155.469	316.489	224.159	266.354	156.15	121.856	137.941	1.71322	1.71322	0.00158925	0.0302151
6845416	NM_025288 // Stfa3 // stefin A3 // 16 B3|16 22.85 cM // 20863 /// ENSMUST00000068182 //	Stfa3	NM_025288	chr16	36450622	36455450	-	46.4421	41.0338	42.442	46.0935	43.9411	32.72	32.1608	32.4393	58.5164	50.5129	54.3674	0.73824	-1.35457	0.00159601	0.0302151
6794357	NM_033522 // Ferd3l // Fer3-like (Drosophila) // 12|12 B2 // 114712 /// ENSMUST00000061	Ferd3l	NM_033522	chr12	34369234	34620472	+	65.603	66.9671	68.6044	57.9333	64.6425	83.1423	96.4627	89.5549	64.1239	64.3496	64.2369	1.3854	1.3854	0.00159971	0.0302151
6785102	NM_181749 // Gpr142 // G protein-coupled receptor 142 // 11 E2|11 // 217302 /// ENSMUST	Gpr142	NM_181749	chr11	114660238	114668059	+	40.885	51.5968	54.5013	48.64	48.6292	68.9152	84.8169	76.454	43.6521	45.0605	44.3509	1.57218	1.57218	0.00160618	0.0302151
6840249	NM_053241 // Cldn16 // claudin 16 // 16|16 B2 // 114141 /// ENSMUST00000161053 // Cldn1	Cldn16	NM_053241	chr16	26431820	26524213	+	66.2661	62.6034	70.011	66.7502	66.3553	94.1938	81.9953	87.8835	69.7248	72.8436	71.2669	1.32443	1.32443	0.00160623	0.0302151
6915567	ENSMUST00000030306 // Hook1 // hook homolog 1 (Drosophila) // 4 C5|4 45.5 cM // 77963 /	Hook1	ENSMUST00000030306	chr4	95633951	95692103	+	291.77	340.897	278.872	332.7	309.941	216.107	223.113	219.581	293.153	320.347	306.448	0.708461	-1.41151	0.00161172	0.0302151
6827787	NM_010024 // Dct // dopachrome tautomerase // 14 E4|14 58.0 cM // 13190 /// ENSMUST0000	Dct	NM_010024	chr14	118399640	118451463	-	80.9792	94.3048	95.6657	90.4676	90.1653	118.347	152.417	134.306	94.0626	90.4946	92.2617	1.48955	1.48955	0.00161262	0.0302151
6925777	NM_013622 // Oprd1 // opioid receptor, delta 1 // 4 D1-D3|4 64.8 cM // 18386 /// ENSMUS	Oprd1	NM_013622	chr4	131655478	131700401	-	431.812	436.719	471.711	401.674	434.77	593.124	578.29	585.66	467.836	413.241	439.692	1.34705	1.34705	0.0016181	0.0302435
6994715	ENSMUST00000167960 // Olfr151 // olfactory receptor 151 // 9 A4|9 // 406176 /// ENSMUST	Olfr151	ENSMUST00000167960	chr9	37538376	37538678	-	27.9749	22.4576	48.8586	22.4576	28.8144	72.0587	94.9331	82.7089	16.4674	17.5825	17.0158	2.87041	2.87041	0.00162675	0.030284
6946744	NM_175524 // C130060K24Rik // RIKEN cDNA C130060K24 gene // 6 C1|6 // 243407 /// ENSMUS	C130060K24Rik	NM_175524	chr6	65331119	65408144	+	107.886	132.227	140.001	124.287	125.52	176.276	188.59	182.329	126.049	118.015	121.966	1.4526	1.4526	0.00163348	0.030284
6910281	ENSMUST00000029836 // Dnase2b // deoxyribonuclease II beta // 3 H2|3 // 56629 /// NM_01	Dnase2b	ENSMUST00000029836	chr3	146213439	146262146	-	66.8113	71.6801	78.908	70.9972	71.9703	100.061	91.8476	95.8662	73.3818	76.0228	74.6909	1.33203	1.33203	0.00164533	0.030284
6990685	NM_010357 // Gsta4 // glutathione S-transferase, alpha 4 // 9 E1|9 // 14860 /// ENSMUST	Gsta4	NM_010357	chr9	78039789	78057150	+	2460.95	2184.67	2235.99	2433.13	2325.62	1649.26	1841.93	1742.93	2225.63	2375.97	2299.65	0.749461	-1.33429	0.00164985	0.030284
6946002	NM_173428 // Sspo // SCO-spondin // 6 B2.3|6 // 243369 /// NM_173428 // Sspo // SCO-spo	Sspo	NM_173428	chr6	48383725	48451238	+	202.137	201.032	222.404	193.062	204.38	256.802	280.584	268.43	203.712	197.015	200.336	1.31339	1.31339	0.00165142	0.030284
6818315	NM_173418 // Lrit2 // leucine-rich repeat, immunoglobulin-like and transmembrane domain	Lrit2	NM_173418	chr14	37881261	37886921	+	61.1758	64.2614	67.0753	72.2687	66.0712	87.1416	86.7733	86.957	66.0163	63.4439	64.7173	1.31612	1.31612	0.00165531	0.030284
6773633	NM_172393 // Aim1 // absent in melanoma 1 // 10 B2|10 29.0 cM // 11630 /// ENSMUST00000	Aim1	NM_172393	chr10	43670136	43868653	-	264.391	275.119	224.87	263.011	256.105	352.683	407.45	379.078	276.921	233.853	254.477	1.48017	1.48017	0.00166453	0.030284
6959507	---	---	---	chr7	30340519	30363653	+	64.1319	65.3063	71.8143	70.1315	67.7702	100.016	90.6421	95.2139	78.7234	64.8516	71.4519	1.40495	1.40495	0.00166661	0.030284
6810691	NM_031250 // Ucn3 // urocortin 3 // 13 A1|13 // 83428 /// ENSMUST00000058610 // Ucn3 //	Ucn3	NM_031250	chr13	3939954	3993077	-	75.8296	98.1033	121.305	93.2021	95.7652	166.293	169.609	167.943	93.1646	102.104	97.5324	1.75369	1.75369	0.0016716	0.030284
6960203	NM_008457 // Klk1b8 // kallikrein 1-related peptidase b8 // 7 B4|7 23.21 cM // 16624 //	Klk1b8	NM_008457	chr7	51206061	51210308	+	31.7746	32.3439	38.3911	44.0643	36.3116	57.6205	62.6173	60.067	37.8686	45.0143	41.2871	1.6542	1.6542	0.00167316	0.030284
6919091	NM_013783 // Mmel1 // membrane metallo-endopeptidase-like 1 // 4 E2|4 // 27390 /// ENSM	Mmel1	NM_013783	chr4	154243694	154269630	+	102.971	106.222	122.175	105.01	108.839	141.919	156.327	148.949	110.57	102.998	106.717	1.36852	1.36852	0.00167605	0.030284
6892899	NM_011414 // Slpi // secretory leukocyte peptidase inhibitor // 2 H|2 // 20568 /// ENSM	Slpi	NM_011414	chr2	164147209	164198436	-	161.124	164.329	183.142	171.207	169.744	215.905	224.839	220.327	179.53	167.605	173.465	1.29799	1.29799	0.00167632	0.030284
6749301	---	---	---	chr1	49301475	49397265	+	27.6817	22.3599	23.0162	26.9376	24.8894	35.238	50.5371	42.1997	27.585	26.5924	27.0842	1.6955	1.6955	0.00167649	0.030284
6923402	NM_027089 // 4930579C15Rik // RIKEN cDNA 4930579C15 gene // 4 C5|4 // 67753 /// ENSMUST	4930579C15Rik	NM_027089	chr4	94569456	94599125	-	25.7545	24.5048	26.6538	23.7926	25.1522	31.6644	32.1196	31.8913	26.7488	27.192	26.9694	1.26793	1.26793	0.00167801	0.030284
6940570	ENSMUST00000134926 // 1700016H13Rik // RIKEN cDNA 1700016H13 gene // 5|5 E4 // 74218 //	1700016H13Rik	ENSMUST00000134926	chr5	104077068	104085019	-	84.4994	94.6054	98.4849	94.4998	92.8738	120.226	132.41	126.17	95.7234	85.8276	90.6403	1.35852	1.35852	0.00167968	0.030284
6968826	---	---	---	chr7	88366950	88367760	-	75.025	89.1288	88.0414	68.5531	79.7051	129.395	121.732	125.505	84.4749	69.0653	76.3825	1.57462	1.57462	0.00169924	0.0305025
6782246	NM_027819 // Ggt6 // gamma-glutamyltransferase 6 // 11 B4|11 // 71522 /// ENSMUST000000	Ggt6	NM_027819	chr11	72234407	72252068	+	296.315	301.372	326.394	285.101	301.926	378.007	420.336	398.609	281.603	297.387	289.388	1.32023	1.32023	0.00170861	0.0305025
7020764	NM_177429 // Ofd1 // oral-facial-digital syndrome 1 gene homolog (human) // X F5|X 72.0	Ofd1	NM_177429	chrX	162828495	162891032	-	500.154	522.606	458.361	525.294	500.866	370.554	310.322	339.103	444.115	544.304	491.664	0.677033	-1.47703	0.0017089	0.0305025
6985389	NM_027570 // Ldhd // lactate dehydrogenase D // 8 E1|8 55.0 cM // 52815 /// ENSMUST0000	Ldhd	NM_027570	chr8	114137829	114201008	-	195.005	187.565	214.941	189.246	196.398	262.03	265.327	263.674	213.482	186.457	199.512	1.34255	1.34255	0.00171549	0.0305025
6965262	NM_018802 // Syt8 // synaptotagmin VIII // 7 F5|7 // 55925 /// ENSMUST00000118276 // Sy	Syt8	NM_018802	chr7	149620775	149626303	+	221.311	227.847	250.37	227.498	231.5	287.417	311.801	299.36	226.576	231.377	228.964	1.29313	1.29313	0.00172441	0.0305025
6823693	NM_008406 // Itih1 // inter-alpha trypsin inhibitor, heavy chain 1 // 14|14 A2-C1 // 16	Itih1	NM_008406	chr14	31742386	31759747	-	96.6515	99.2159	99.6405	93.9069	97.3264	126.91	118.384	122.572	100.001	93.6197	96.7574	1.2594	1.2594	0.00172931	0.0305025
6779588	NM_025923 // Fancl // Fanconi anemia, complementation group L // 11|11 A2-A3 // 67030 /	Fancl	NM_025923	chr11	26287084	26371871	+	556.852	638.211	525.545	643.305	588.754	420.505	387	403.406	506.771	587.71	545.744	0.685186	-1.45946	0.00173257	0.0305025
6946103	NM_029916 // Stk31 // serine threonine kinase 31 // 6 B2.3|6 // 77485 /// ENSMUST000000	Stk31	NM_029916	chr6	49345570	49419505	+	24.2748	23.3004	22.2358	22.9896	23.1887	28.2314	30.2395	29.2183	24.7878	23.9173	24.3487	1.26002	1.26002	0.00173273	0.0305025
6969641	NM_011010 // Omp // olfactory marker protein // 7 E2|7 48.0 cM // 18378 /// ENSMUST0000	Omp	NM_011010	chr7	105291870	105293992	-	146.642	125.887	129.232	149.746	137.48	198.868	186.182	192.421	125.812	141.528	133.438	1.39962	1.39962	0.00173308	0.0305025
6948033	NM_198668 // 4930590J08Rik // RIKEN cDNA 4930590J08 gene // 6 D1|6 // 381798 /// ENSMUS	4930590J08Rik	NM_198668	chr6	91852803	91916341	+	103.516	90.965	99.5197	87.8214	95.2462	122.631	134.949	128.643	97.4081	94.5221	95.9546	1.35063	1.35063	0.00173717	0.0305025
6805591	NM_010088 // Prl8a2 // prolactin family 8, subfamily a, member 2 // 13 A3.1|13 14.0 cM	Prl8a2	NM_010088	chr13	27437552	27446065	+	29.4914	34.0943	27.9514	29.6703	30.2187	41.0767	42.9888	42.0219	37.0813	32.7331	34.8395	1.39059	1.39059	0.0017391	0.0305025
6963072	NM_146359 // Olfr564 // olfactory receptor 564 // 7 E3|7 // 258356 /// ENSMUST000000610	Olfr564	NM_146359	chr7	109951994	109952987	+	36.5949	38.9924	31.8798	22.1847	31.6949	59.1465	77.2327	67.5873	34.7623	33.5691	34.1603	2.13242	2.13242	0.00174023	0.0305025
6937061	NM_011773 // Slc30a3 // solute carrier family 30 (zinc transporter), member 3 // 5 B1|5	Slc30a3	NM_011773	chr5	31388480	31410590	-	349.258	365.711	390.823	328.732	357.912	462.616	494.018	478.057	374.938	353.871	364.254	1.33569	1.33569	0.00174367	0.0305025
6784178	NM_010257 // Gast // gastrin // 11 D|11 60.0 cM // 14459 /// ENSMUST00000017309 // Gast	Gast	NM_010257	chr11	100183775	100200321	+	343.961	350.925	419.821	354.303	366.051	496.015	514.976	505.406	405.579	378.233	391.669	1.3807	1.3807	0.00176499	0.0307846
6754444	ENSMUST00000040797 // Tnr // tenascin R // 1 E2|1 // 21960 /// NM_022312 // Tnr // tena	Tnr	ENSMUST00000040797	chr1	161327058	161857057	+	91.7649	107.593	114.492	104.042	104.139	143.371	144.735	144.051	115.57	106.838	111.118	1.38327	1.38327	0.00176786	0.0307846
6755729	NM_030131 // Cnih4 // cornichon homolog 4 (Drosophila) // 1 H4|1 // 98417 /// ENSMUST00	Cnih4	NM_030131	chr1	183074401	183099213	+	2157.28	2358.25	2073.28	2229.18	2202.15	1676.22	1633.56	1654.75	1804.15	2078.03	1936.18	0.751464	-1.33074	0.0017816	0.0308897
6869974	ENSMUST00000026225 // Sema4g // sema domain, immunoglobulin domain (Ig), transmembrane	Sema4g	ENSMUST00000026225	chr19	45063087	45079923	+	630.302	595.257	546.827	531.553	574.662	762.863	783.185	772.955	575.479	623.489	599.003	1.34506	1.34506	0.00178197	0.0308897
6951102	NM_172734 // Stk38l // serine/threonine kinase 38 like // 6 G3|6 // 232533 /// ENSMUST0	Stk38l	NM_172734	chr6	146619945	146727329	+	363.328	322.101	335.554	352.417	342.987	425.095	472.85	448.337	337.286	323.343	330.24	1.30715	1.30715	0.00178937	0.0309174
6939725	NM_023135 // Sult1e1 // sulfotransferase family 1E, member 1 // 5 E1|5 44.0 cM // 20860	Sult1e1	NM_023135	chr5	88005234	88030255	-	14.1112	12.9857	14.5357	14.7018	14.0673	18.6631	22.3144	20.4073	14.7965	17.905	16.2767	1.45069	1.45069	0.00179251	0.0309174
6949697	NM_139218 // Dppa3 // developmental pluripotency-associated 3 // 6 F2|6 // 73708 /// EN	Dppa3	NM_139218	chr6	122576441	122586511	+	40.2657	41.0725	54.619	42.1237	44.1662	64.3318	77.2536	70.4975	47.6575	47.1904	47.4232	1.59618	1.59618	0.00179746	0.0309174
6959085	NM_203489 // Vmn1r183 // vomeronasal 1 receptor 183 // 7 A3|7 // 209824 /// ENSMUST0000	Vmn1r183	NM_203489	chr7	24839964	24840710	+	173.166	133.33	191.538	156.744	162.26	269.343	252.128	260.594	142.985	160.697	151.583	1.60603	1.60603	0.00179975	0.0309174
6780430	NM_008352 // Il12b // interleukin 12b // 11 A5-B2|11 19.0 cM // 16160 /// ENSMUST000001	Il12b	NM_008352	chr11	44165669	44256473	+	112.325	121.716	122.063	109.625	116.3	152.722	160.221	156.426	131.006	112.367	121.329	1.34502	1.34502	0.00180459	0.030931
6946920	NM_001081110 // Cd8a // CD8 antigen, alpha chain // 6 C|6 30.5 cM // 12525 /// ENSMUST0	Cd8a	NM_001081110	chr6	71323355	71339930	+	107.987	100.085	106.441	86.4198	99.8541	134.129	149.698	141.7	82.58	83.4101	82.9943	1.41907	1.41907	0.00183265	0.0311272
6826219	NM_011613 // Tnfsf11 // tumor necrosis factor (ligand) superfamily, member 11 // 14 D3|	Tnfsf11	NM_011613	chr14	78677253	78720697	-	563.616	549.532	609.63	557.045	569.487	751.256	728.245	739.661	649.651	577.866	612.71	1.29882	1.29882	0.00183392	0.0311272
6775300	ENSMUST00000020566 // Theg // testicular haploid expressed gene // 10|10 B5-C1 // 21830	Theg	ENSMUST00000020566	chr10	79039222	79050066	-	57.8157	64.0186	74.266	66.9017	65.4853	89.7077	106.518	97.7524	71.5639	63.8498	67.5971	1.49273	1.49273	0.00183464	0.0311272
6845193	NM_146071 // Muc20 // mucin 20 // 16 B3|16 // 224116 /// ENSMUST00000041123 // Muc20 //	Muc20	NM_146071	chr16	32785890	32797533	-	240.296	181.742	239.815	201.134	214.235	324.465	338.42	331.368	215.014	188.62	201.386	1.54675	1.54675	0.00183467	0.0311272
6936587	NM_030727 // Slc26a5 // solute carrier family 26, member 5 // 5 A3|5 8.0 cM // 80979 //	Slc26a5	NM_030727	chr5	21297165	21371422	-	57.0063	56.6962	58.4556	50.6065	55.6068	75.4684	71.4365	73.4245	55.8239	60.9646	58.3378	1.32043	1.32043	0.00184532	0.0311272
6838368	NM_001011778 // Olfr285 // olfactory receptor 285 // 15 F1|15 // 257943 /// ENSMUST0000	Olfr285	NM_001011778	chr15	98139709	98166892	-	53.7786	79.757	63.0048	59.049	63.2034	122.546	118.268	120.388	85.5645	57.5674	70.1835	1.90477	1.90477	0.00185173	0.0311272
6817059	NM_147027 // Olfr31 // olfactory receptor 31 // 14|14 A2 // 18330 /// ENSMUST0000010087	Olfr31	NM_147027	chr14	15155444	15161580	+	113.256	101.515	119.391	95.5544	107.017	167.677	158.186	162.862	130.319	102.785	115.736	1.52183	1.52183	0.00185265	0.0311272
6939695	NM_153598 // Ugt2b34 // UDP glucuronosyltransferase 2 family, polypeptide B34 // 5 E1|5	Ugt2b34	NM_153598	chr5	87318796	87335945	-	37.9535	35.9293	42.2064	36.621	38.1024	53.0154	55.3223	54.1568	44.9366	36.5201	40.5104	1.42134	1.42134	0.00185758	0.0311272
6854043	NM_013521 // Fpr1 // formyl peptide receptor 1 // 17 A3.2|17 10.2 cM // 14293 /// ENSMU	Fpr1	NM_013521	chr17	18008689	18020907	-	133.905	155.135	175.311	152.754	153.577	210.866	263.681	235.8	139.208	149.625	144.323	1.53538	1.53538	0.00185937	0.0311272
6829297	NM_177597 // March11 // membrane-associated ring finger (C3HC4) 11 // 15 B1|15 // 21114	2011-03-01	NM_177597	chr15	26238803	26342117	+	162.088	214.648	187.032	183.387	185.861	272.254	280.433	276.313	204.032	174.237	188.547	1.48666	1.48666	0.00186651	0.0311272
6753552	NM_177397 // Atp6v1g3 // ATPase, H+ transporting, lysosomal V1 subunit G3 // 1 E4|1 //	Atp6v1g3	NM_177397	chr1	140120875	140186039	+	54.5841	56.3323	62.6195	48.7875	55.3618	78.6699	80.0539	79.3589	59.5075	52.0971	55.6789	1.43346	1.43346	0.00186939	0.0311272
6953170	NM_130869 // Nobox // NOBOX oogenesis homeobox // 6 B2.1|6 18.3 cM // 18291 /// ENSMUST	Nobox	NM_130869	chr6	43242908	43294147	-	80.4795	79.9585	78.8785	75.5322	78.6885	94.8812	111.07	102.657	77.1337	78.8621	77.9929	1.3046	1.3046	0.00187584	0.0311272
6875695	NM_025980 // Nrarp // Notch-regulated ankyrin repeat protein // 2 A3|2 // 67122 /// ENS	Nrarp	NM_025980	chr2	25036278	25041742	+	563.628	558.944	545.086	522.429	547.286	659.597	745.715	701.335	533.262	525.17	529.2	1.28148	1.28148	0.0018814	0.0311272
6998286	ENSMUST00000116522 // Nck1 // non-catalytic region of tyrosine kinase adaptor protein 1	Nck1	ENSMUST00000116522	chr9	100392722	100446543	-	774.778	831.914	756.617	841.669	800.418	638.242	552.232	593.679	733.351	806.343	768.979	0.741711	-1.34823	0.00188249	0.0311272
6846518	NM_147000 // Olfr173 // olfactory receptor 173 // 16 C2|16 // 259002 /// ENSMUST0000004	Olfr173	NM_147000	chr16	58760358	58797619	-	28.3882	24.596	33.5523	29.8981	28.9295	40.9485	48.5951	44.6083	39.0411	36.8727	37.9414	1.54196	1.54196	0.00188699	0.0311272
6986719	NM_008607 // Mmp13 // matrix metallopeptidase 13 // 9|9 A1-A2 // 17386 /// ENSMUST00000	Mmp13	NM_008607	chr9	7272555	7283331	+	379.412	260.413	275.016	416.837	326.231	93.9675	133.373	111.949	522.602	254.607	364.772	0.343161	-2.91408	0.00188875	0.0311272
6986056	ENSMUST00000140012 // Pgbd5 // piggyBac transposable element derived 5 // 8 E2|8 // 209	Pgbd5	ENSMUST00000140012	chr8	126892956	127012028	-	289.464	272.145	267.164	256.786	271.135	346.317	373.181	359.498	308.191	269.857	288.387	1.3259	1.3259	0.00189511	0.0311272
6836325	NM_172514 // Tmem71 // transmembrane protein 71 // 15 D2|15 // 213068 /// ENSMUST000000	Tmem71	NM_172514	chr15	66345308	66392784	-	48.9776	46.8758	65.8289	55.4041	53.7931	86.5925	84.8275	85.7052	56.3874	49.1548	52.647	1.59324	1.59324	0.00189661	0.0311272
6965880	NM_177593 // Gm4763 // predicted gene 4763 // 7 A3|7 // 210155 /// ENSMUST00000081657 /	Gm4763	NM_177593	chr7	25491435	25511123	-	21.769	25.8566	27.8808	24.2553	24.8387	34.2049	37.9245	36.0166	30.6607	27.3845	28.9765	1.45002	1.45002	0.00189978	0.0311272
6901573	NM_021382 // Tacr3 // tachykinin receptor 3 // 3|3 H2 // 21338 /// ENSMUST00000029822 /	Tacr3	NM_021382	chr3	134491971	134597536	+	84.9151	75.037	86.3887	77.2338	80.7477	105.23	104.955	105.093	76.0982	77.7688	76.9292	1.30149	1.30149	0.00190108	0.0311272
7013389	ENSMUST00000040504 // Klhl4 // kelch-like 4 (Drosophila) // X E1|X // 237010 /// NM_172	Klhl4	ENSMUST00000040504	chrX	111587841	111674718	+	703.268	647.354	657.169	634.818	660.159	538.592	455.681	495.403	658.267	679.566	668.832	0.750435	-1.33256	0.00190926	0.0311272
6769020	NR_015547 // 1700009J07Rik // RIKEN cDNA 1700009J07 gene // 10 C1|10 // 75188 /// NR_01	1700009J07Rik	NR_015547	chr10	77356165	77358856	+	88.8549	99.5452	94.2604	94.0744	94.1076	118.89	137.006	127.627	91.6168	104.362	97.7822	1.35618	1.35618	0.00191381	0.0311272
6988287	NM_146811 // Olfr910 // olfactory receptor 910 // 9 A5|9 // 258807 /// ENSMUST000000732	Olfr910	NM_146811	chr9	38346482	38347414	+	22.2686	24.1578	25.4898	20.5716	23.0461	31.3701	37.3273	34.2193	25.9995	22.3794	24.1215	1.48482	1.48482	0.00191809	0.0311272
6974101	NM_024279 // Spaca7 // sperm acrosome associated 7 // 8|8 A2 // 78634 /// ENSMUST000000	Spaca7	NM_024279	chr8	12573049	12608887	+	54.9798	61.6748	49.9243	64.6402	57.5151	81	84.3222	82.6441	58.5696	60.5918	59.5719	1.43692	1.43692	0.00192174	0.0311272
6945748	NM_008843 // Pip // prolactin induced protein // 6 B2|6 20.5 cM // 18716 /// ENSMUST000	Pip	NM_008843	chr6	41767518	41802062	+	24.7753	24.8651	25.0971	27.3779	25.507	34.2737	31.5118	32.8636	27.2375	25.4739	26.3409	1.28842	1.28842	0.00192531	0.0311272
6866856	NM_207651 // Slc14a2 // solute carrier family 14 (urea transporter), member 2 // 18 E3|	Slc14a2	NM_207651	chr18	78342889	78829405	-	139.399	142.391	152.047	139.705	143.296	178.568	184.609	181.563	146.036	134.42	140.107	1.26706	1.26706	0.00192574	0.0311272
6910751	NM_177066 // Tnni3k // TNNI3 interacting kinase // 3 H4|3 // 435766 /// ENSMUST00000064	Tnni3k	NM_177066	chr3	154449273	154719146	-	71.14	68.7525	73.4423	67.3801	70.1407	85.1521	91.0792	88.0658	74.7121	72.3876	73.5406	1.25556	1.25556	0.00192597	0.0311272
6843914	NM_013694 // Tnp2 // transition protein 2 // 16 B1-B3|16 3.4 cM // 21959 /// ENSMUST000	Tnp2	NM_013694	chr16	10788038	10788879	-	151.04	148.274	172.563	138.374	152.069	203.31	214.468	208.815	152.918	161.715	157.255	1.37316	1.37316	0.00193662	0.031204
6753003	NM_011082 // Pigr // polymeric immunoglobulin receptor // 1 E3|1 68.2 cM // 18703 /// E	Pigr	NM_011082	chr1	132723238	132748826	+	108.433	110.124	112.173	94.7832	106.149	152.481	149.225	150.845	108.608	88.5887	98.0884	1.42107	1.42107	0.00193889	0.031204
6979451	NM_008290 // Hsd17b2 // hydroxysteroid (17-beta) dehydrogenase 2 // 8 E1|8 // 15486 ///	Hsd17b2	NM_008290	chr8	120224897	120306275	+	144.743	171.203	144.559	160.279	154.796	204.043	260.923	230.738	167.172	153.185	160.026	1.4906	1.4906	0.00195252	0.0312976
6802023	NM_023721 // Atp6v1d // ATPase, H+ transporting, lysosomal V1 subunit D // 12 C3|12 36.	Atp6v1d	NM_023721	chr12	79943830	79962950	-	1673.44	1735.1	1691.63	1884.15	1744.14	1356.62	1232.18	1292.9	1645.83	1904.64	1770.45	0.741272	-1.34903	0.00195972	0.0312976
6957046	ENSMUST00000032211 // Gdf3 // growth differentiation factor 3 // 6 F1|6 60.6 cM // 1456	Gdf3	ENSMUST00000032211	chr6	122555438	122560105	-	101.048	98.1958	94.1083	78.3928	92.498	127.913	157.026	141.724	98.4357	108.415	103.305	1.53219	1.53219	0.00196162	0.0312976
6792424	NM_176847 // Ush1g // Usher syndrome 1G // 11 E2|11 77.0 cM // 16470 /// ENSMUST0000010	Ush1g	NM_176847	chr11	115176507	115183244	-	212.321	232.182	250.739	207.332	224.997	299.458	368.681	332.272	261.261	231.841	246.112	1.47678	1.47678	0.00196647	0.0312976
6885939	NM_010725 // Lmx1b // LIM homeobox transcription factor 1 beta // 2 B|2 21.0 cM // 1691	Lmx1b	NM_010725	chr2	33420156	33496604	-	251.147	284.19	280.203	248.374	265.478	364.837	379.754	372.222	276.777	227.779	251.086	1.40208	1.40208	0.00196803	0.0312976
6972129	NM_146953 // Olfr531 // olfactory receptor 531 // 7 F4|7 // 258955 /// ENSMUST000000801	Olfr531	NM_146953	chr7	147585977	147586943	-	28.3721	27.2107	36.8901	26.3341	29.4283	47.1305	47.8445	47.486	25.6538	30.4523	27.9503	1.61362	1.61362	0.00197589	0.0312976
6817955	NM_018746 // Itih4 // inter alpha-trypsin inhibitor, heavy chain 4 // 14 B|14 11.75 cM	Itih4	NM_018746	chr14	31699680	31715519	+	88.1201	97.2604	100.358	89.7077	93.7236	117.354	126.784	121.977	91.6663	94.1318	92.8912	1.30147	1.30147	0.00197698	0.0312976
6791251	NM_010895 // Neurod2 // neurogenic differentiation 2 // 11 D|11 57.0 cM // 18013 /// EN	Neurod2	NM_010895	chr11	98186454	98206790	-	121.678	137.413	150.399	149.301	139.199	200.085	189.397	194.668	144.39	132.695	138.419	1.39848	1.39848	0.00198459	0.0312976
6882499	ENSMUST00000029123 // a // nonagouti // 2 H1|2 89.0 cM // 50518 /// NM_015770 // a // n	a	ENSMUST00000029123	chr2	154839267	154876747	+	168.131	175.33	185.564	156.491	171.049	216.168	248.824	231.923	164.455	167.134	165.788	1.35588	1.35588	0.00198741	0.0312976
6924749	ENSMUST00000124071 // Dmbx1 // diencephalon/mesencephalon homeobox 1 // 4 D1|4 54.8 cM	Dmbx1	ENSMUST00000124071	chr4	115566129	115660518	-	157.939	186.92	200.566	159.312	175.251	254.475	256.112	255.293	168	185.458	176.513	1.45672	1.45672	0.00199145	0.0312976
6923394	ENSMUST00000107101 // Lrrc19 // leucine rich repeat containing 19 // 4 C5|4 // 100061 /	Lrrc19	ENSMUST00000107101	chr4	94270673	94316835	-	45.053	42.8576	38.833	40.9329	41.8559	52.8587	66.2432	59.1735	45.1533	44.797	44.9746	1.41375	1.41375	0.00199336	0.0312976
6888830	NM_172670 // Gyltl1b // glycosyltransferase-like 1B // 2 E1|2 // 228366 /// ENSMUST0000	Gyltl1b	NM_172670	chr2	92205043	92212180	-	931.886	907.944	856.328	792.21	870.415	1170.49	1646.86	1388.39	919.713	814.844	865.692	1.5951	1.5951	0.00199463	0.0312976
6797744	NM_007539 // Bdkrb1 // bradykinin receptor, beta 1 // 12|12 F1 // 12061 /// ENSMUST0000	Bdkrb1	NM_007539	chr12	106838205	106843539	+	123.144	130.661	141.838	117.785	128.044	167.677	194.451	180.568	122.696	109.452	115.885	1.4102	1.4102	0.00199793	0.0312976
6840101	NM_001102411 // Kng1 // kininogen 1 // 16 B1|16 // 16644 /// ENSMUST00000023589 // Kng1	Kng1	NM_001102411	chr16	23058308	23082141	+	43.8119	48.7115	42.996	44.2265	44.8831	59.8173	65.1562	62.4297	52.4002	42.9221	47.4248	1.39094	1.39094	0.00201578	0.0312986
6963126	NM_146354 // Olfr633 // olfactory receptor 633 // 7 E3|7 // 258351 /// ENSMUST000000981	Olfr633	NM_146354	chr7	111095022	111096020	+	95.1453	86.406	125.907	94.4311	99.4314	188.623	150.407	168.434	123.726	115.129	119.35	1.69397	1.69397	0.00201945	0.0312986
6792352	NM_028055 // Btbd17 // BTB (POZ) domain containing 17 // 11 E2|11 // 72014 /// ENSMUST0	Btbd17	NM_028055	chr11	114651983	114657465	-	299.938	324.389	303.407	284.17	302.64	376.754	392.071	384.338	273.557	278.864	276.198	1.26995	1.26995	0.00201994	0.0312986
6832571	NM_182928 // Adm2 // adrenomedullin 2 // 15 E3|15 // 223780 /// ENSMUST00000066991 // A	Adm2	NM_182928	chr15	89153405	89155299	+	265.659	260.448	272.182	240.897	259.527	325.152	356.582	340.504	246.977	224.301	235.366	1.31202	1.31202	0.00202004	0.0312986
6993138	NM_001166625 // Ccr9 // chemokine (C-C motif) receptor 9 // 9 F|9 71.2 cM // 12769 ///	Ccr9	NM_001166625	chr9	123587235	123698016	+	79.0262	80.7231	96.8184	79.294	83.655	124.999	110.659	117.61	93.7437	94.4121	94.0776	1.4059	1.4059	0.00202467	0.0312986
6933619	ENSMUST00000031547 // 4930519G04Rik // RIKEN cDNA 4930519G04 gene // 5 F|5 // 67593 ///	4930519G04Rik	ENSMUST00000031547	chr5	115303683	115333668	+	82.1267	85.1893	87.7033	78.7343	83.3708	101.707	110.537	106.03	84.7664	83.1492	83.9542	1.27179	1.27179	0.00202557	0.0312986
6988356	NM_146854 // Olfr982 // olfactory receptor 982 // 9 A5-B|9 // 258853 /// ENSMUST0000005	Olfr982	NM_146854	chr9	39868395	39900503	+	164.932	194.323	191.817	197.669	186.708	265.95	242.49	253.948	165.368	174.379	169.814	1.36014	1.36014	0.0020279	0.0312986
6952141	NM_027754 // Rnf148 // ring finger protein 148 // 6 A3.1|6 // 71300 /// ENSMUST00000104	Rnf148	NM_027754	chr6	23603906	23605155	-	120.101	132.143	107.241	102.783	115.006	176.362	157.584	166.709	115.764	110.756	113.232	1.44958	1.44958	0.00203342	0.0312986
6947909	NM_053219 // Vmn1r47 // vomeronasal 1 receptor 47 // 6 D1|6 // 113846 /// ENSMUST000000	Vmn1r47	NM_053219	chr6	89971085	89972989	+	12.2944	11.6621	12.1986	12.7029	12.2088	23.2291	16.9022	19.8147	11.7206	15.269	13.3777	1.62298	1.62298	0.00203484	0.0312986
6826916	NM_175245 // Mzt1 // mitotic spindle organizing protein 1 // 14 E2.2|14 // 76789 /// EN	Mzt1	NM_175245	chr14	99418262	99445335	-	2152.95	2194.38	2427.24	2272.4	2259.36	2882.09	2899.52	2890.89	2409.64	2223.01	2314.52	1.27947	1.27947	0.00205209	0.0315006
6959588	ENSMUST00000058280 // Prodh2 // proline dehydrogenase (oxidase) 2 // 7 B1|7 // 56189 //	Prodh2	ENSMUST00000058280	chr7	31278290	31298421	+	142.11	144.476	165.124	129.694	144.806	219.694	192.227	205.502	143.401	149	146.174	1.41915	1.41915	0.00205871	0.0315389
6861281	NM_001081328 // Chsy3 // chondroitin sulfate synthase 3 // 18 D3|18 // 78923 /// ENSMUS	Chsy3	NM_001081328	chr18	59335006	59570975	+	496.72	458.431	511.879	495.359	490.194	598.908	685.499	640.742	506.395	485.578	495.878	1.30712	1.30712	0.00206989	0.031597
6856364	BC033350 // 2610034M16Rik // RIKEN cDNA 2610034M16 gene // 17 D|17 // 69239 /// ENSMUST	2610034M16Rik	BC033350	chr17	59018231	59130866	-	67.6801	71.5123	75.6627	65.191	69.9	89.1597	92.4839	90.8063	68.855	73.1512	70.9706	1.29909	1.29909	0.00207473	0.031597
6999688	NM_009912 // Ccr1 // chemokine (C-C motif) receptor 1 // 9 F|9 71.6 cM // 12768 /// ENS	Ccr1	NM_009912	chr9	123876957	123888006	-	91.8839	105.222	94.2206	113.223	100.776	69.4778	75.6915	72.5181	111.492	106.666	109.052	0.719599	-1.38966	0.00207491	0.031597
6834408	---	---	---	chr15	25031898	25168585	-	49.1561	47.6955	47.3411	41.619	46.3604	71.7303	59.5203	65.3407	54.1861	49.6868	51.8877	1.40941	1.40941	0.00208345	0.0316067
6825424	NM_010932 // Pnoc // prepronociceptin // 14 D1|14 // 18155 /// ENSMUST00000059339 // Pn	Pnoc	NM_010932	chr14	66019510	66063033	-	142.719	161.194	163.758	134.491	150.031	205.316	210.934	208.107	154.525	139.786	146.971	1.38709	1.38709	0.00208381	0.0316067
6960240	NM_008454 // Klk1b16 // kallikrein 1-related peptidase b16 // 7 B4|7 23.05 cM // 16615	Klk1b16	NM_008454	chr7	51377663	51396977	+	21.6232	22.5878	23.8608	20.9242	22.2219	29.3082	33.4239	31.2985	26.1362	21.5025	23.7065	1.40845	1.40845	0.00209521	0.0317167
6888626	NM_146790 // Olfr1238 // olfactory receptor 1238 // 2 E1|2 // 258786 /// ENSMUST0000009	Olfr1238	NM_146790	chr2	89246287	89247234	-	17.4156	23.4059	18.5602	19.4739	19.5918	29.5116	30.9584	30.2265	23.7223	28.9739	26.2168	1.5428	1.5428	0.0021151	0.0317639
6942444	NM_001013412 // Ccl26 // chemokine (C-C motif) ligand 26 // 5 G2|5 // 541307 /// ENSMUS	Ccl26	NM_001013412	chr5	136036184	136040723	-	82.2207	58.3144	69.0309	80.0828	71.7521	146.97	109.714	126.983	64.884	76.853	70.6154	1.76974	1.76974	0.00211832	0.0317639
6991701	NM_144533 // Nmnat3 // nicotinamide nucleotide adenylyltransferase 3 // 9|9 E4 // 74080	Nmnat3	NM_144533	chr9	98180598	98320926	+	314.381	307.753	328.928	292.123	310.513	386.381	391.457	388.909	307.947	307.05	307.497	1.25247	1.25247	0.00212019	0.0317639
6850258	NM_146077 // Trim31 // tripartite motif-containing 31 // 17 B1|17 // 224762 /// ENSMUST	Trim31	NM_146077	chr17	37034573	37047162	+	86.3426	89.5629	103.556	103.299	95.3691	125.501	141.734	133.37	101.597	96.9279	99.2352	1.39847	1.39847	0.00213076	0.0317639
6996246	NM_172446 // Skor1 // SKI family transcriptional corepressor 1 // 9 C|9 // 207667 /// E	Skor1	NM_172446	chr9	62985981	62996758	-	168.351	191.764	204.834	184.051	186.78	240.538	264.712	252.336	191.885	199.302	195.558	1.35098	1.35098	0.00213235	0.0317639
6822469	ENSMUST00000164598 // Acox2 // acyl-Coenzyme A oxidase 2, branched chain // 14 A1|14 //	Acox2	ENSMUST00000164598	chr14	9058026	9091867	-	99.4459	94.9693	99.5418	101.37	98.8028	119.177	138.161	128.318	96.6649	90.4689	93.5159	1.29873	1.29873	0.00213284	0.0317639
6965544	NM_134205 // Vmn1r76 // vomeronasal 1 receptor 76 // 7 A1|7 // 171239 /// ENSMUST000000	Vmn1r76	NM_134205	chr7	12515660	12516634	-	17.4221	20.0792	18.3031	15.9112	17.8657	24.8987	27.558	26.1946	16.0532	19.361	17.6297	1.4662	1.4662	0.00213501	0.0317639
6852753	NM_026180 // Abcg8 // ATP-binding cassette, sub-family G (WHITE), member 8 // 17 E4|17	Abcg8	NM_026180	chr17	85075652	85101020	+	132.912	144.412	153.008	129.922	139.763	177.696	196.207	186.722	129.015	133.193	131.087	1.336	1.336	0.00213516	0.0317639
6880852	ENSMUST00000110495 // Slc12a1 // solute carrier family 12, member 1 // 2 F1|2 69.5 cM /	Slc12a1	ENSMUST00000110495	chr2	124978262	125055733	+	43.2629	40.4602	46.005	41.0142	42.6304	53.5109	59.6144	56.4801	47.4044	43.2069	45.257	1.32488	1.32488	0.00213573	0.0317639
6753400	NM_133664 // Lad1 // ladinin // 1 E4|1 // 16763 /// ENSMUST00000038760 // Lad1 // ladin	Lad1	NM_133664	chr1	137715163	137730085	+	669.119	768.952	684.777	705.049	705.983	883.025	1073.72	973.718	737.567	701.257	719.185	1.37924	1.37924	0.00214786	0.0318798
6819075	---	---	---					85.6927	84.5756	81.3613	78.5283	82.4913	103.543	106.35	104.936	89.862	80.722	85.1698	1.27209	1.27209	0.00215291	0.0318798
6937290	ENSMUST00000094868 // Zfyve28 // zinc finger, FYVE domain containing 28 // 5 B2|5 // 23	Zfyve28	ENSMUST00000094868	chr5	34537521	34631081	-	198.52	182.833	175.209	166.054	180.267	242.493	237.783	240.126	192.102	174.427	183.051	1.33206	1.33206	0.00215742	0.0318798
6787809	NM_178247 // Dppa1 // developmental pluripotency associated 1 // 11 B1.1|11 // 347708 /	Dppa1	NM_178247	chr11	46421951	46442763	-	33.2241	33.4098	37.2253	31.3915	33.7478	42.434	49.0949	45.6429	31.7204	31.0857	31.4015	1.35248	1.35248	0.00216335	0.0318798
6848209	NM_023663 // Ripk4 // receptor-interacting serine-threonine kinase 4 // 16 C4|16 // 723	Ripk4	NM_023663	chr16	97963549	97985374	-	356.241	379.875	322.371	366.371	355.563	453.139	573.135	509.617	365.404	348.487	356.844	1.43327	1.43327	0.00216437	0.0318798
6878720	NM_016914 // Prg3 // proteoglycan 3 // 2 D|2 50.0 cM // 53856 /// ENSMUST00000028466 //	Prg3	NM_016914	chr2	84828361	84834043	+	60.3457	58.0752	68.919	66.2106	63.2376	81.1844	90.6227	85.7741	65.3992	61.4372	63.3872	1.35637	1.35637	0.0021811	0.0320644
6833061	NM_177716 // AI836003 // expressed sequence AI836003 // 15 F1|15 // 239650 /// ENSMUST0	AI836003	NM_177716	chr15	97998091	98000565	+	165.574	165.622	193.904	166.294	172.442	238.689	221.938	230.161	158.772	168.007	163.325	1.33472	1.33472	0.00218529	0.0320644
6943496	NM_172709 // Otop1 // otopetrin 1 // 5 B3|5 24.0 cM // 21906 /// ENSMUST00000114099 //	Otop1	NM_172709	chr5	38666636	38708726	+	10.8754	13.0207	10.8858	10.0249	11.1494	15.4267	17.4935	16.4276	10.9172	9.55337	10.2125	1.4734	1.4734	0.00219505	0.0320848
6975651	NM_001009548 // 4930529F22Rik // RIKEN cDNA 4930529F22 gene // 8 A4|8 // 384806 /// ENS	4930529F22Rik	NM_001009548	chr8	41878649	41882633	+	14.3128	13.9939	14.8097	13.2792	14.0879	18.6613	22.6398	20.5546	17.2916	13.8231	15.4604	1.45902	1.45902	0.00220402	0.0320848
6767870	NM_001141927 // Pln // phospholamban // 10 B3|10 // 18821 /// ENSMUST00000163319 // Pln	Pln	NM_001141927	chr10	53057509	53065787	+	79.4376	72.2397	73.5004	75.0079	74.998	91.3416	107.688	99.1781	81.5577	76.9884	79.2402	1.32242	1.32242	0.00220947	0.0320848
6749851	NM_009843 // Ctla4 // cytotoxic T-lymphocyte-associated protein 4 // 1 C|1 30.1 cM // 1	Ctla4	NM_009843	chr1	60943864	61098205	+	54.1504	52.746	51.3076	49.8748	51.9953	62.6	71.3776	66.8451	53.1844	50.7874	51.9723	1.2856	1.2856	0.00221068	0.0320848
6939987	NM_008599 // Cxcl9 // chemokine (C-X-C motif) ligand 9 // 5 E2|5 53.0 cM // 17329 /// E	Cxcl9	NM_008599	chr5	92750371	92757143	-	88.2975	96.9333	101.073	85.7563	92.8069	117.867	136.924	127.038	103.517	99.8001	101.642	1.36884	1.36884	0.00221444	0.0320848
6754777	NM_173029 // Adcy10 // adenylate cyclase 10 // 1 H2.3|1 // 271639 /// ENSMUST0000002785	Adcy10	NM_173029	chr1	167415324	167506904	+	48.2056	47.3411	50.5048	46.1091	48.0136	59.6996	62.4873	61.0775	48.9919	44.0668	46.464	1.27209	1.27209	0.00221529	0.0320848
6861576	ENSMUST00000080418 // Nedd4l // neural precursor cell expressed, developmentally down-r	Nedd4l	ENSMUST00000080418	chr18	65047352	65382598	+	1665.22	1803.27	1671.24	1780.91	1729.09	1413.64	1315.78	1363.88	1655.56	1778.07	1715.72	0.788783	-1.26778	0.00221901	0.0320848
6850178	NM_175148 // 2300002M23Rik // RIKEN cDNA 2300002M23 gene // 17 B1|17 // 69542 /// ENSMU	2300002M23Rik	NM_175148	chr17	35704430	35709066	+	169.301	173.319	170.233	141.507	163.054	220.395	314.453	263.256	148.15	147.162	147.654	1.61453	1.61453	0.00222332	0.0320848
6855466	ENSMUST00000024707 // Mep1a // meprin 1 alpha // 17 C1-D1|17 30.4 cM // 17287 /// NM_00	Mep1a	ENSMUST00000024707	chr17	43595936	43690029	-	40.1729	36.3182	40.5368	39.4051	39.0719	48.2307	49.9911	49.103	35.5952	36.4663	36.0281	1.25673	1.25673	0.00222445	0.0320848
6993102	NM_177911 // Tgm4 // transglutaminase 4 (prostate) // 9 F4|9 // 331046 /// ENSMUST00000	Tgm4	NM_177911	chr9	122943859	122976676	+	66.6161	64.8763	70.013	64.8107	66.546	81.8006	87.8816	84.7869	73.5294	66.5289	69.9417	1.2741	1.2741	0.0022343	0.0321217
6778133	NM_146670 // Olfr815 // olfactory receptor 815 // 10 D3|10 // 258665 /// ENSMUST0000007	Olfr815	NM_146670	chr10	129338832	129339782	-	8.48039	10.5305	9.01964	10.191	9.51847	13.0905	15.5372	14.2615	10.3142	8.71602	9.48153	1.49829	1.49829	0.00223542	0.0321217
6953604	NM_010453 // Hoxa5 // homeobox A5 // 6 B3|6 26.3 cM // 15402 /// ENSMUST00000048794 //	Hoxa5	NM_010453	chr6	52151753	52154014	-	87.036	85.1621	96.0478	88.4647	89.0843	117.816	109.689	113.68	86.0683	82.1968	84.1103	1.27609	1.27609	0.00224456	0.0321536
6785665	NM_197979 // Uqcr10 // ubiquinol-cytochrome c reductase, complex III subunit X // 11 A1	Uqcr10	NM_197979	chr11	4583145	4604343	-	775.966	1032.27	1061.36	982.252	955.942	610.958	532.062	570.147	836.743	1100.09	959.421	0.596426	-1.67665	0.00224718	0.0321536
6749736	NM_009812 // Casp8 // caspase 8 // 1 B|1 30.1 cM // 12370 /// NM_001080126 // Casp8 //	Casp8	NM_009812	chr1	58818409	58904327	+	3222.58	3400.19	3189.25	3439.3	3311.11	2665.89	2677	2671.44	3024.33	3191.68	3106.77	0.806824	-1.23943	0.00225638	0.0321536
6907624	NM_013486 // Cd2 // CD2 antigen // 3 F2.2|3 48.2 cM // 12481 /// ENSMUST00000029456 //	Cd2	NM_013486	chr3	100939050	101151403	-	129.12	124.582	126.769	108.495	121.96	158.479	193.871	175.284	133.791	119.652	126.524	1.43722	1.43722	0.00226053	0.0321536
6786666	NM_027860 // 0610010F05Rik // RIKEN cDNA 0610010F05 gene // 11|11 A3.3 // 71675 /// ENS	0610010F05Rik	NM_027860	chr11	23464967	23533875	-	658.486	666.393	656.936	680.089	665.415	563.706	522.762	542.846	650.376	646.143	648.256	0.815806	-1.22578	0.00226199	0.0321536
6878941	ENSMUST00000102609 // Olfr1258 // olfactory receptor 1258 // 2 E1|2 // 258980 /// NM_14	Olfr1258	ENSMUST00000102609	chr2	89767500	89770903	+	60.6014	65.5753	74.5574	57.4538	64.2329	87.3212	96.3358	91.7178	65.1968	65.8559	65.5257	1.42789	1.42789	0.00226925	0.0321536
6820050	NM_028560 // Pebp4 // phosphatidylethanolamine binding protein 4 // 14 D2|14 // 73523 /	Pebp4	NM_028560	chr14	70204919	70459705	+	58.0104	64.4666	66.6254	51.5389	59.8625	81.6409	93.0562	87.1622	64.9636	61.9697	63.4488	1.45604	1.45604	0.00227283	0.0321536
6818500	NM_010775 // Mbl1 // mannose-binding lectin (protein A) 1 // 14 B|14 15.0 cM // 17194 /	Mbl1	NM_010775	chr14	41961973	41972944	+	42.3805	43.8979	46.8615	36.5647	42.2544	57.0977	62.0174	59.5067	38.4321	41.1831	39.7838	1.4083	1.4083	0.00227335	0.0321536
6833466	ENSMUST00000055562 // Hoxc12 // homeobox C12 // 15 F3|15 57.4 cM // 15421 /// NM_010463	Hoxc12	ENSMUST00000055562	chr15	102767284	102776261	+	116.638	99.1513	121.107	106.236	110.445	152.537	145.344	148.897	101.245	99.7123	100.476	1.34816	1.34816	0.00227549	0.0321536
6747696	NM_001011873 // Xkr9 // X Kell blood group precursor related family member 9 homolog //	Xkr9	NM_001011873	chr1	13658862	13691794	+	31.2924	29.4305	28.6909	25.8122	28.7376	37.5021	38.1561	37.8277	28.3756	28.7833	28.5787	1.31631	1.31631	0.00229078	0.0322211
6823797	NM_009891 // Chat // choline acetyltransferase // 14 B|14 10.5 cM // 12647 /// ENSMUST0	Chat	NM_009891	chr14	33221373	33279167	-	91.2081	78.7376	92.3302	78.3613	84.9016	114.909	113.463	114.183	83.3979	79.8035	81.5809	1.3449	1.3449	0.00229119	0.0322211
6897598	ENSMUST00000029369 // Sohlh2 // spermatogenesis and oogenesis specific basic helix-loop	Sohlh2	ENSMUST00000029369	chr3	54985952	55031294	+	92.5563	95.2924	98.2823	94.6946	95.1842	113.453	120.436	116.893	92.8609	90.1115	91.4759	1.22806	1.22806	0.00229592	0.0322211
6876023	NM_011989 // Slc27a4 // solute carrier family 27 (fatty acid transporter), member 4 //	Slc27a4	NM_011989	chr2	29658174	29673042	+	1647.77	1577.8	1593.74	1504.64	1580.1	2031.46	1955.47	1993.1	1819.21	1653.03	1734.13	1.26133	1.26133	0.00229863	0.0322211
6949740	ENSMUST00000088455 // Clec4b2 // C-type lectin domain family 4, member b2 // 6 F2|6 //	Clec4b2	ENSMUST00000088455	chr6	123122932	123154669	+	25.4475	22.4563	25.1187	21.9692	23.6973	30.9567	30.8178	30.8873	23.4722	23.8018	23.6364	1.3034	1.3034	0.00230728	0.0322211
6961869	---	---	---	chr7	85723473	85725924	+	169.873	172.487	210.238	142.144	172.02	288.137	257.861	272.579	181.172	175.54	178.334	1.58457	1.58457	0.00230882	0.0322211
6765325	ENSMUST00000161737 // Hsd11b1 // hydroxysteroid 11-beta dehydrogenase 1 // 1 H6|1 // 15	Hsd11b1	ENSMUST00000161737	chr1	195047814	195090228	-	53.0492	46.3427	55.8065	50.4978	51.3044	65.8819	73.8845	69.7688	47.8932	51.9276	49.8696	1.35989	1.35989	0.00231788	0.0322211
6947764	NM_019964 // Dnajb8 // DnaJ (Hsp40) homolog, subfamily B, member 8 // 6 D2|6 38.6 cM //	Dnajb8	NM_019964	chr6	88172272	88173248	+	77.9053	79.4591	89.7979	79.3078	81.4843	113.59	101.121	107.174	73.2212	73.4525	73.337	1.31528	1.31528	0.00232524	0.0322211
6957762	ENSMUST00000032343 // Erp27 // endoplasmic reticulum protein 27 // 6 G1|6 // 69187 ///	Erp27	ENSMUST00000032343	chr6	136850546	136871898	-	142.412	139.832	149.216	135.297	141.601	180.339	171.497	175.862	126.665	128.637	127.647	1.24196	1.24196	0.00232549	0.0322211
6963076	NM_146360 // Olfr574 // olfactory receptor 574 // 7 E3|7 // 258357 /// ENSMUST000000529	Olfr574	NM_146360	chr7	110096935	110098021	+	118.391	88.2907	93.4181	81.2086	94.3663	153.062	145.11	149.033	95.679	89.3311	92.4506	1.5793	1.5793	0.00232623	0.0322211
6771052	NM_008337 // Ifng // interferon gamma // 10 D2|10 67.0 cM // 15978 /// ENSMUST000000685	Ifng	NM_008337	chr10	117856196	117882950	+	182.806	189.402	172.877	164.386	177.111	233.847	240.963	237.379	190.091	162.287	175.64	1.34029	1.34029	0.00232664	0.0322211
6770002	---	---	---					31.2477	32.9072	33.9331	41.0213	34.5887	48.6939	69.9906	58.3791	34.8663	38.4985	36.6375	1.6878	1.6878	0.00233301	0.032251
6850066	ENSMUST00000168533 // Tnxb // tenascin XB // 17 B1|17 18.74 cM // 81877 /// NM_031176 /	Tnxb	ENSMUST00000168533	chr17	34797534	34938568	+	157.012	155.948	173.362	151.487	159.243	203.167	213.152	208.1	169.883	151.514	160.437	1.30681	1.30681	0.00234424	0.0323251
6845540	NM_010936 // Nr1i2 // nuclear receptor subfamily 1, group I, member 2 // 16 B3|16 // 18	Nr1i2	NM_010936	chr16	38248218	38295147	-	86.1453	87.6426	85.3394	79.0717	84.4854	109.14	102.528	105.782	84.4725	84.7981	84.6354	1.25208	1.25208	0.00235321	0.0323251
6810548	NM_010330 // Emb // embigin // 13 D2.3|13 // 13723 /// ENSMUST00000022242 // Emb // emb	Emb	NM_010330	chr13	117991213	118082624	+	811.232	701.637	882.535	768.457	788.228	576.198	468.502	519.565	800.268	664.903	729.452	0.659157	-1.51709	0.00236855	0.0323251
6965893	ENSMUST00000079306 // Lypd4 // Ly6/Plaur domain containing 4 // 7 A3|7 // 232973 /// NM	Lypd4	ENSMUST00000079306	chr7	25649638	25654767	-	34.623	36.0336	40.2278	41.1805	37.9159	48.7098	57.4199	52.8859	39.5276	37.1415	38.3161	1.39482	1.39482	0.00236942	0.0323251
6792844	NM_027622 // Tex19.2 // testis expressed gene 19.2 // 11 E2|11 // 70956 /// ENSMUST0000	Tex19.2	NM_027622	chr11	120967593	121010354	-	124.097	131.527	139.168	118.449	128.075	162.735	168.622	165.652	130.414	127.355	128.875	1.29341	1.29341	0.00236964	0.0323251
6796305	NM_019579 // Mpp5 // membrane protein, palmitoylated 5 (MAGUK p55 subfamily member 5) /	Mpp5	NM_019579	chr12	79849954	79941681	+	166.519	191.069	147.226	200.668	175.097	101.946	73.3991	86.5025	142.117	225.553	179.039	0.494027	-2.02418	0.00237883	0.0323251
6980075	NM_008790 // Pcp2 // Purkinje cell protein 2 (L7) // 8 A1.1|8 1.0 cM // 18545 /// ENSMU	Pcp2	NM_008790	chr8	3623379	3625791	-	100.69	99.6184	119.412	100.589	104.768	154.118	141.952	147.91	125.848	106.251	115.635	1.41178	1.41178	0.0023799	0.0323251
6825639	ENSMUST00000059362 // Synb // syncytin b // 14 D2|14 // 239167 /// NM_173420 // Synb //	Synb	ENSMUST00000059362	chr14	69903619	69939963	-	82.6699	90.5436	101.064	89.3038	90.6604	120.84	123.281	122.054	97.3426	108.085	102.573	1.34628	1.34628	0.00238749	0.0323251
6869035	NM_021396 // Pdcd1lg2 // programmed cell death 1 ligand 2 // 19|19 C2-C3 // 58205 /// E	Pdcd1lg2	NM_021396	chr19	29485419	29563583	+	71.5619	65.9463	73.5345	58.8716	67.2308	99.5804	90.4281	94.8943	73.1294	65.4681	69.1928	1.41147	1.41147	0.00240085	0.0323251
6885624	NM_009885 // Cel // carboxyl ester lipase // 2 A3|2 16.0 cM // 12613 /// ENSMUST0000002	Cel	NM_009885	chr2	28411346	28418882	-	112.622	107.697	110.277	99.8832	107.51	135.801	138.13	136.961	94.669	103.319	98.8994	1.27393	1.27393	0.00240445	0.0323251
6945807	NM_146986 // Olfr38 // olfactory receptor 38 // 6 B2|6 22.5 cM // 258988 /// ENSMUST000	Olfr38	NM_146986	chr6	42712053	42713006	+	46.0478	53.2659	50.6971	33.49	45.174	82.3074	92.026	87.0312	52.0851	37.7454	44.3395	1.92657	1.92657	0.00240612	0.0323251
6853849	NM_172826 // Dact2 // dapper homolog 2, antagonist of beta-catenin (xenopus) // 17|17 A	Dact2	NM_172826	chr17	14050304	14341291	-	478.011	515.05	496.366	496.672	496.352	591.289	678.794	633.53	485.238	498.027	491.593	1.27638	1.27638	0.00240842	0.0323251
6980089	NM_013517 // Fcer2a // Fc receptor, IgE, low affinity II, alpha polypeptide // 8 A1|8 0	Fcer2a	NM_013517	chr8	3681737	3694178	-	81.573	83.9862	90.8799	77.1289	83.2455	104.185	126.459	114.783	92.0681	88.9079	90.4739	1.37886	1.37886	0.0024109	0.0323251
6766333	NM_053008 // Olig3 // oligodendrocyte transcription factor 3 // 10 A3|10 // 94222 /// E	Olig3	NM_053008	chr10	19076162	19082782	+	96.5524	103.88	124.13	123.393	111.331	176.986	154.724	165.481	101.584	109.077	105.263	1.48639	1.48639	0.00241884	0.0323251
6855201	NM_177636 // H2-M1 // histocompatibility 2, M region locus 1 // 17 B1|17 20.23 cM // 22	H2-M1	NM_177636	chr17	36794122	36809142	-	63.7202	54.1208	57.6904	55.3883	57.6157	79.1079	77.0947	78.0946	49.9319	58.4767	54.0357	1.35544	1.35544	0.00242893	0.0323251
6778128	ENSMUST00000091986 // Olfr810 // olfactory receptor 810 // 10 D3|10 // 258543 /// NM_14	Olfr810	ENSMUST00000091986	chr10	129227705	129228698	-	7.32201	6.3195	6.71813	7.58611	6.96861	9.52204	8.99186	9.25318	7.54442	7.31314	7.42788	1.32784	1.32784	0.00243202	0.0323251
6808363	NM_001145676 // 2210408I21Rik // RIKEN cDNA 2210408I21 gene // 13 C1|13 // 72371 /// EN	2210408I21Rik	NM_001145676	chr13	77274585	77752909	+	574.61	598.704	515.215	621.293	576.058	449.738	411.84	430.372	576.925	607.546	592.04	0.747095	-1.33852	0.00243251	0.0323251
6756572	---	---	---					268.774	275.98	321.234	270.6	283.369	406.316	362.865	383.978	278.09	268.234	273.118	1.35504	1.35504	0.0024383	0.0323251
6850290	NM_146514 // Olfr96 // olfactory receptor 96 // 17 B1|17 // 258507 /// ENSMUST000000782	Olfr96	NM_146514	chr17	37362072	37363013	+	61.4087	87.1283	85.4927	72.5066	75.888	112.741	139.257	125.3	76.0908	71.6324	73.8277	1.65111	1.65111	0.00243954	0.0323251
6917959	NM_130879 // Usp48 // ubiquitin specific peptidase 48 // 4 D3|4 // 170707 /// ENSMUST00	Usp48	NM_130879	chr4	137211797	137214442	+	1908.73	1936.72	1855.9	2160.13	1962.12	1459.95	1367.57	1413.05	1833.39	2243.44	2028.08	0.720165	-1.38857	0.00243995	0.0323251
6943003	ENSMUST00000161741 // Atp5j2 // ATP synthase, H+ transporting, mitochondrial F0 complex	Atp5j2	ENSMUST00000161741	chr5	145944582	145952911	-	829.392	819.006	906.379	739.21	821.354	1068.52	1185.6	1125.54	801.817	722.458	761.104	1.37034	1.37034	0.00244307	0.0323251
6799771	NM_009417 // Tpo // thyroid peroxidase // 12 C|12 15.0 cM // 22018 /// ENSMUST000000210	Tpo	NM_009417	chr12	30739524	30846025	-	132.982	136.484	156.629	133.573	139.594	177.167	192.105	184.485	139.993	137.448	138.714	1.32158	1.32158	0.0024489	0.0323251
6969888	NM_001252552 // Folr1 // folate receptor 1 (adult) // 7 E3|7 // 14275 /// NM_008034 //	Folr1	NM_001252552	chr7	109006863	109019295	-	197.436	221.684	225.37	202.995	211.536	274.633	300.871	287.453	181.051	212.029	195.928	1.35888	1.35888	0.00245056	0.0323251
6898996	NM_153090 // Fcrl1 // Fc receptor-like 1 // 3 F1|3 // 229499 /// ENSMUST00000163661 //	Fcrl1	NM_153090	chr3	87180317	87207869	+	62.3069	62.6525	70.1752	59.7899	63.6165	79.6239	85.9503	82.7266	64.9915	66.6023	65.792	1.30039	1.30039	0.00245658	0.0323251
6967016	NM_021482 // Syngr4 // synaptogyrin 4 // 7 B4|7 // 58867 /// ENSMUST00000039049 // Syng	Syngr4	NM_021482	chr7	53141476	53152071	-	231.483	220.723	247.501	225.168	231	282.346	345.66	312.404	236.852	235.823	236.337	1.35239	1.35239	0.00245929	0.0323251
6760620	NM_139152 // Asb18 // ankyrin repeat and SOCS box-containing 18 // 1 D|1 // 208372 ///	Asb18	NM_139152	chr1	91849253	91911152	-	144.255	148.887	147.779	136.209	144.195	188.262	195.36	191.779	149.468	123.786	136.022	1.32999	1.32999	0.00246886	0.0323251
6916912	NM_023865 // 9530002B09Rik // RIKEN cDNA 9530002B09 gene // 4 D2.2|4 // 77432 /// ENSMU	9530002B09Rik	NM_023865	chr4	122366518	122382372	+	49.0748	49.1544	43.5334	49.1187	47.6565	61.0729	72.3836	66.4879	56.1323	48.0329	51.9247	1.39515	1.39515	0.00246908	0.0323251
6887913	---	---	---	chr2	74586073	74600933	-	154.764	197.248	189.27	181.331	179.912	238.146	280.31	258.369	201.113	205.461	203.275	1.43609	1.43609	0.00248648	0.0323251
6963912	NM_026458 // Abca14 // ATP-binding cassette, sub-family A (ABC1), member 14 // 7 F2|7 /	Abca14	NM_026458	chr7	127347478	127468856	+	39.3453	39.686	44.0125	37.8261	40.1537	50.3019	53.7633	52.004	41.5455	39.1622	40.3361	1.29512	1.29512	0.00248737	0.0323251
6857957	NM_029121 // Atp6v1e2 // ATPase, H+ transporting, lysosomal V1 subunit E2 // 17 E4|17 /	Atp6v1e2	NM_029121	chr17	87343455	87362444	-	42.2975	41.3777	45.8583	40.8771	42.5592	52.0325	60.9646	56.3217	44.8218	47.3831	46.0848	1.32337	1.32337	0.0024956	0.0323251
6973099	NM_146915 // Olfr1336 // olfactory receptor 1336 // 7 A1|7 // 258917 /// ENSMUST0000005	Olfr1336	NM_146915	chr7	6413222	6414166	+	88.2846	106.521	115.858	93.8835	100.568	169.244	141	154.478	108.552	93.3689	100.674	1.53606	1.53606	0.00250271	0.0323251
6785123	NM_027132 // Otop3 // otopetrin 3 // 11 E2|11 // 69602 /// ENSMUST00000019006 // Otop3	Otop3	NM_027132	chr11	115196059	115208240	+	160.781	163.016	173.854	150.956	161.947	240.544	200.971	219.869	169.697	156.662	163.049	1.35766	1.35766	0.00250893	0.0323251
6963315	NM_146723 // Olfr513 // olfactory receptor 513 // 7 E3|7 // 258718 /// ENSMUST000000551	Olfr513	NM_146723	chr7	115898372	115909452	+	92.6032	87.6784	106.115	93.2906	94.6854	121.688	159.346	139.25	99.6881	101.217	100.45	1.47065	1.47065	0.00251152	0.0323251
6771927	ENSMUST00000019896 // Iyd // iodotyrosine deiodinase // 10 A1|10 // 70337 /// NM_027391	Iyd	ENSMUST00000019896	chr10	6661096	6806319	-	101.249	109.364	110.785	117.5	109.571	145.708	139.877	142.762	101.488	113.282	107.223	1.30292	1.30292	0.00251211	0.0323251
6762103	NM_009581 // Zp3r // zona pellucida 3 receptor // 1 E4|1 67.0 cM // 22789 /// ENSMUST00	Zp3r	NM_009581	chr1	132473290	132526179	-	33.0615	35.5427	36.3096	32.3753	34.283	42.429	48.3562	45.2959	40.8791	37.3509	39.0752	1.32124	1.32124	0.00251935	0.0323251
6994633	NM_026593 // D730048I06Rik // RIKEN cDNA D730048I06 gene // 9 A4|9 // 68171 /// ENSMUST	D730048I06Rik	NM_026593	chr9	35595635	35597697	-	21.3446	25.5978	25.6607	24.2422	24.1453	33.0562	31.4854	32.2612	24.9874	23.6712	24.3203	1.33613	1.33613	0.00253545	0.0323251
6984358	NM_053200 // Ces1d // carboxylesterase 1D // 8 C5|8 // 104158 /// ENSMUST00000034172 //	Ces1d	NM_053200	chr8	95689976	95721719	-	97.5601	87.4848	91.3853	91.8864	92.0094	112.566	115.641	114.093	89.3719	86.9642	88.1599	1.24001	1.24001	0.00253631	0.0323251
6819275	NM_020490 // Ltb4r2 // leukotriene B4 receptor 2 // 14|14 C1 // 57260 /// ENSMUST000000	Ltb4r2	NM_020490	chr14	56380265	56382107	+	441.032	493.194	553.4	481.282	490.606	649.344	900.467	764.668	459.369	458.377	458.873	1.55862	1.55862	0.00254083	0.0323251
6865957	NM_201353 // Slc6a7 // solute carrier family 6 (neurotransmitter transporter, L-proline	Slc6a7	NM_201353	chr18	61155034	61173985	-	162.814	157.765	180.762	158.368	164.672	216.874	239.41	227.863	180.657	149.099	164.121	1.38374	1.38374	0.00255003	0.0323251
6856182	NM_144546 // Zfp119a // zinc finger protein 119a // 17 D|17 // 104349 /// ENSMUST000000	Zfp119a	NM_144546	chr17	56000763	56018218	-	141.988	171.672	119.646	168.483	148.886	86.8263	74.367	80.3558	121.353	176.927	146.529	0.539714	-1.85283	0.00255019	0.0323251
6927118	ENSMUST00000030792 // Tas1r1 // taste receptor, type 1, member 1 // 4 E2|4 81.5 cM // 1	Tas1r1	ENSMUST00000030792	chr4	151402023	151412677	-	122.787	123.836	131.933	116.689	123.693	151.191	186.608	167.969	121.278	121.224	121.251	1.35795	1.35795	0.00255251	0.0323251
6999348	NM_026442 // Cmc1 // COX assembly mitochondrial protein homolog (S. cerevisiae) // 9 F3	Cmc1	NM_026442	chr9	117973057	118059241	-	619.212	557.941	545.872	579.498	574.965	457.558	408.499	432.333	505.004	574.16	538.473	0.751927	-1.32992	0.00255999	0.0323251
6803757	NM_025488 // 1700001K19Rik // RIKEN cDNA 1700001K19 gene // 12 F1|12 // 66323 /// ENSMU	1700001K19Rik	NM_025488	chr12	111905899	111917190	-	207.405	206.631	253.254	207.361	217.809	302.934	295.911	299.402	214.275	198.486	206.23	1.37461	1.37461	0.00256321	0.0323251
6987351	NM_023892 // Icam4 // intercellular adhesion molecule 4, Landsteiner-Wiener blood group	Icam4	NM_023892	chr9	20833898	20835021	+	146.221	144.064	154.234	140.894	146.272	181.828	207.395	194.192	162.94	141.163	151.661	1.32761	1.32761	0.00256822	0.0323251
6788017	ENSMUST00000102772 // Ltc4s // leukotriene C4 synthase // 11|11 B1.1-B1.2 // 17001 ///	Ltc4s	ENSMUST00000102772	chr11	50049876	50052098	-	227.129	222.895	261.017	215.453	230.992	298.151	313.797	305.873	228.016	230.421	229.215	1.32417	1.32417	0.00257263	0.0323251
6936745	NM_080444 // Asb10 // ankyrin repeat and SOCS box-containing 10 // 5 A3|5 // 117590 ///	Asb10	NM_080444	chr5	24038515	24046839	-	127.573	125.355	143.73	124.406	130.039	164.209	184.479	174.049	121.416	134.498	127.79	1.33844	1.33844	0.00257568	0.0323251
6892266	NM_029599 // Sun5 // Sad1 and UNC84 domain containing 5 // 2|2 H2 // 76407 /// ENSMUST0	Sun5	NM_029599	chr2	153681948	153696826	-	51.9708	46.9697	57.2685	57.0542	53.1427	72.5901	71.9933	72.2913	52.1144	57.004	54.5044	1.36031	1.36031	0.00257654	0.0323251
6818499	NM_023134 // Sftpa1 // surfactant associated protein A1 // 14 B|14 14.0 cM // 20387 ///	Sftpa1	NM_023134	chr14	41945009	41949741	+	167.083	135.136	146.175	132.351	144.569	211.024	198.117	204.468	153.407	135.763	144.315	1.41433	1.41433	0.00258231	0.0323251
6813761	ENSMUST00000021889 // Ctsr // cathepsin R // 13 B2|13 35.0 cM // 56835 /// NM_020284 //	Ctsr	ENSMUST00000021889	chr13	61260570	61265607	-	45.143	52.2863	46.4884	41.3708	46.1587	63.602	64.2351	63.918	47.6419	42.0333	44.7498	1.38474	1.38474	0.00258406	0.0323251
6837812	NM_138302 // Tymp // thymidine phosphorylase // 15 F1|15 51.6 cM // 72962 /// ENSMUST00	Tymp	NM_138302	chr15	89202068	89207179	-	366.063	386.981	390.806	353.138	373.929	465.688	463.572	464.63	370.569	382.26	376.371	1.24256	1.24256	0.00258481	0.0323251
6996603	NM_022378 // Foxb1 // forkhead box B1 // 9 D|9 41.0 cM // 64290 /// ENSMUST00000071281	Foxb1	NM_022378	chr9	69605537	69608727	-	270.4	277.857	313.945	226.359	270.315	387.043	541.227	457.688	308.011	270.109	288.439	1.69316	1.69316	0.00258787	0.0323251
6986737	ENSMUST00000018767 // Mmp7 // matrix metallopeptidase 7 // 9 A1|9 1.0 cM // 17393 /// N	Mmp7	ENSMUST00000018767	chr9	7692100	7699575	+	101.704	116.244	104.015	98.6263	104.942	149.783	134.733	142.058	116.145	102.271	108.988	1.35369	1.35369	0.00259084	0.0323251
6970442	ENSMUST00000177236 // Rnf141 // ring finger protein 141 // 7|7 F2 // 67150 /// ENSMUST0	Rnf141	ENSMUST00000177236	chr7	117943956	117987938	-	1506.62	1328.15	1323.83	1385.03	1383.97	1095.29	1096.89	1096.13	1294.61	1289.86	1292.19	0.791974	-1.26267	0.00259118	0.0323251
6770745	NM_026223 // Glipr1l2 // GLI pathogenesis-related 1 like 2 // 10|10 D1 // 67537 /// ENS	Glipr1l2	NM_026223	chr10	111520373	111545154	+	48.0089	39.6849	47.078	50.508	46.135	71.3143	61.2089	66.0685	43.783	40.6713	42.1985	1.43207	1.43207	0.00259491	0.0323251
6949348	AK049916 // Gm9946 // predicted gene 9946 // 6 F1|6 // 330403 /// AK162833 // Gm9946 //	Gm9946	AK049916	chr6	117509725	117521384	+	50.173	57.6576	58.4176	51.6469	54.3535	70.9598	73.4367	72.1876	59.4774	53.5918	56.4578	1.32811	1.32811	0.00260833	0.0323251
6964531	NM_007769 // Dmbt1 // deleted in malignant brain tumors 1 // 7|7 F4 // 12945 /// ENSMUS	Dmbt1	NM_007769	chr7	138175599	138415824	+	52.7343	50.8181	56.9297	44.9011	51.1595	67.0944	86.7854	76.3073	51.2361	50.9627	51.0992	1.49156	1.49156	0.00261401	0.0323251
6970137	NM_017371 // Hpx // hemopexin // 7|7 F1 // 15458 /// ENSMUST00000033185 // Hpx // hemop	Hpx	NM_017371	chr7	112740136	112748604	-	117.322	109.116	121.272	109.171	114.1	143.075	147.392	145.217	129.316	118.326	123.699	1.27272	1.27272	0.00261676	0.0323251
6967028	ENSMUST00000009667 // Ush1c // Usher syndrome 1C // 7 B4|7 23.0 cM // 72088 /// NM_1536	Ush1c	ENSMUST00000009667	chr7	53438553	53493906	-	130.982	125.603	146.055	118.459	129.889	167.453	184.833	175.928	125.935	132.114	128.988	1.35445	1.35445	0.00262734	0.0323251
6869543	NM_181748 // O3far1 // omega-3 fatty acid receptor 1 // 19 C2-C3|19 // 107221 /// ENSMU	O3far1	NM_181748	chr19	38171569	38188751	+	78.7927	81.4103	85.4252	78.2213	80.913	100.302	100.955	100.627	74.5032	80.3107	77.3527	1.24365	1.24365	0.00262882	0.0323251
6862462	ENSMUST00000131780 // Pqlc1 // PQ loop repeat containing 1 // 18 E3|18 // 66943 /// ENS	Pqlc1	ENSMUST00000131780	chr18	80450041	80489464	+	525.742	484.986	581.28	521.705	527.326	682.308	823.691	749.674	566.075	489.044	526.15	1.42166	1.42166	0.00263213	0.0323251
6844100	---	---	---					52.3156	54.9002	62.9223	55.9091	56.3795	73.1254	82.1	77.4826	66.0396	57.8289	61.7981	1.3743	1.3743	0.0026345	0.0323251
6952436	ENSMUST00000031810 // Tsga14 // testis specific gene A14 // 6 A3.3|6 // 83922 /// NM_03	Tsga14	ENSMUST00000031810	chr6	30603457	30643751	-	685.56	695.217	681.769	759.897	704.917	535.31	578.848	556.655	711.875	743.671	727.599	0.789669	-1.26635	0.00263909	0.0323251
6941029	NM_008993 // Pxmp2 // peroxisomal membrane protein 2 // 5 F|5 59.0 cM // 19301 /// ENSM	Pxmp2	NM_008993	chr5	110703326	110715183	-	108.302	107.294	124.809	98.3962	109.298	164.71	149.984	157.174	128.189	107.384	117.327	1.43804	1.43804	0.0026412	0.0323251
6868181	ENSMUST00000044976 // Glyat // glycine-N-acyltransferase // 19 A|19 // 107146 /// NM_14	Glyat	ENSMUST00000044976	chr19	12707798	12728400	+	28.2682	24.9563	25.8754	26.1683	26.2898	32.3452	39.3093	35.6577	25.4637	27.4391	26.433	1.35634	1.35634	0.00265489	0.0323251
6789269	ENSMUST00000021259 // Gucy2e // guanylate cyclase 2e // 11 B3|11 37.0 cM // 14919 /// E	Gucy2e	ENSMUST00000021259	chr11	69031427	69074295	-	127.043	140.098	142.881	120.854	132.405	166.95	187.75	177.045	130.485	130.917	130.7	1.33715	1.33715	0.00266349	0.0323251
6959586	NM_019459 // Nphs1 // nephrosis 1 homolog, nephrin (human) // 7 A3|7 // 54631 /// ENSMU	Nphs1	NM_019459	chr7	31243354	31273625	+	174.018	196.318	206.492	171.332	186.455	251.168	247.223	249.188	180.532	173.896	177.182	1.33645	1.33645	0.00267109	0.0323251
6873243	NM_001001446 // Cyp2c44 // cytochrome P450, family 2, subfamily c, polypeptide 44 // 19	Cyp2c44	NM_001001446	chr19	44079533	44103718	-	65.3226	66.7044	73.17	75.1187	69.9562	87.5818	101.327	94.2036	74.7043	68.8335	71.7089	1.34662	1.34662	0.00267227	0.0323251
6838747	NM_018787 // Npff // neuropeptide FF-amide peptide precursor // 15 F3|15 // 54615 /// N	Npff	NM_018787	chr15	102354277	102355039	-	425.531	429.454	432.007	434.954	430.473	515.404	515.915	515.658	387.722	395.334	391.511	1.19789	1.19789	0.00267455	0.0323251
6861376	ENSMUST00000025468 // Pde6a // phosphodiesterase 6A, cGMP-specific, rod, alpha // 18 E1	Pde6a	ENSMUST00000025468	chr18	61380133	61456255	+	79.1512	86.9058	84.5317	81.9641	83.0875	99.2517	112.693	105.759	82.2139	83.7252	82.9661	1.27286	1.27286	0.00267861	0.0323251
6942240	ENSMUST00000063656 // A330070K13Rik // RIKEN cDNA A330070K13 gene // 5 G1.3|5 // 381673	A330070K13Rik	ENSMUST00000063656	chr5	130854668	130860491	-	211.448	216.252	253.804	197.169	218.714	295.585	315.945	305.596	203.756	220.704	212.062	1.39724	1.39724	0.00267951	0.0323251
6800974	---	---	---					102.305	96.6046	99.2304	95.6836	98.4228	119.745	140.159	129.55	87.1012	97.6596	92.2297	1.31627	1.31627	0.00268212	0.0323251
6992925	ENSMUST00000174193 // Mobp // myelin-associated oligodendrocytic basic protein // 9 F4|	Mobp	ENSMUST00000174193	chr9	120058797	120090602	+	189.578	189.08	196.422	172.805	186.764	244.417	234.064	239.184	187.221	169.933	178.368	1.28067	1.28067	0.00268328	0.0323251
6751520	NM_053015 // Mlph // melanophilin // 1 D|1 59.0 cM // 171531 /// ENSMUST00000027528 //	Mlph	NM_053015	chr1	92811657	92847814	+	236.63	236.569	249.267	239.559	240.451	284.071	311.857	297.641	249.542	240.596	245.029	1.23784	1.23784	0.00268547	0.0323251
6890851	NM_177653 // F830045P16Rik // RIKEN cDNA F830045P16 gene // 2 F1|2 // 228592 /// ENSMUS	F830045P16Rik	NM_177653	chr2	129257816	129362338	-	49.5726	43.1797	47.8338	44.4096	46.1779	59.8484	58.2808	59.0596	42.6434	40.2894	41.4497	1.27896	1.27896	0.00268655	0.0323251
6963130	NM_147072 // Olfr641 // olfactory receptor 641 // 7 E3|7 // 259075 /// ENSMUST000000981	Olfr641	NM_147072	chr7	111188312	111189250	+	90.7993	70.3038	51.1216	64.9249	67.8454	117.438	152.703	133.915	69.2125	60.0857	64.4876	1.97383	1.97383	0.00268689	0.0323251
6916267	NM_172296 // Dmrta2 // doublesex and mab-3 related transcription factor like family A2	Dmrta2	NM_172296	chr4	109645312	109657013	+	603.416	638.039	661.639	608.507	627.46	787.42	776.822	782.106	642.054	596.377	618.792	1.24645	1.24645	0.0026972	0.0323251
6945509	NM_145364 // Akr1d1 // aldo-keto reductase family 1, member D1 // 6 B1|6 // 208665 ///	Akr1d1	NM_145364	chr6	37392392	37593139	+	28.3577	27.0469	28.5291	24.3578	27.0195	36.2417	34.8228	35.5252	26.2064	28.8392	27.4914	1.31479	1.31479	0.00270005	0.0323251
6978777	NM_001002775 // 4932416K20Rik // RIKEN cDNA 4932416K20 gene // 8 D3|8 // 442809 /// NM_	4932416K20Rik	NM_001002775	chr8	107300920	107322682	+	79.5974	66.5423	92.0688	70.1733	76.4842	120.475	113.554	116.963	80.2028	70.0785	74.9699	1.52925	1.52925	0.00270071	0.0323251
6850337	NM_146630 // Olfr123 // olfactory receptor 123 // 17 B1|17 // 258623 /// ENSMUST0000005	Olfr123	NM_146630	chr17	37932391	37933320	+	84.5604	85.2791	86.7517	102.758	89.5418	142.865	134.03	138.377	122.092	88.8414	104.148	1.54539	1.54539	0.00270657	0.0323251
6934922	ENSMUST00000065785 // Trim50 // tripartite motif-containing 50 // 5 G2|5 // 215061 ///	Trim50	ENSMUST00000065785	chr5	135827788	135843994	+	128.715	164.495	153.426	136.141	145.016	200.698	202.349	201.522	145.118	150.642	147.854	1.38964	1.38964	0.002709	0.0323251
6759388	NM_007774 // Cryga // crystallin, gamma A // 1 C2|1 32.0 cM // 12964 /// ENSMUST0000006	Cryga	NM_007774	chr1	65146986	65150012	-	91.5527	79.855	95.0668	76.3216	85.3418	114.262	134.609	124.019	93.8217	83.5889	88.5573	1.4532	1.4532	0.00270944	0.0323251
6891051	NM_001166206 // Erv3 // endogenous retroviral sequence 3 // 2 F1|2 // 71995 /// ENSMUST	Erv3	NM_001166206	chr2	131680961	131685483	-	82.749	83.1884	85.1928	78.7294	82.4313	98.5415	105.734	102.075	79.1419	75.3105	77.2022	1.2383	1.2383	0.00271113	0.0323251
6866839	NM_146089 // Haus1 // HAUS augmin-like complex, subunit 1 // 18 E3|18 // 225745 /// ENS	Haus1	NM_146089	chr18	77951883	78012585	-	804.055	804.568	709.496	861.788	793.051	618.256	518.744	566.319	720.143	799.719	758.886	0.714104	-1.40036	0.00271696	0.0323251
6819893	NM_144803 // Chrna2 // cholinergic receptor, nicotinic, alpha polypeptide 2 (neuronal)	Chrna2	NM_144803	chr14	66753886	66771783	+	115.934	109.726	109.281	91.4113	106.174	150.871	142.762	146.761	105.788	98.219	101.933	1.38227	1.38227	0.00271797	0.0323251
6811663	NM_013483 // Btn1a1 // butyrophilin, subfamily 1, member A1 // 13 A3.1|13 12.0 cM // 12	Btn1a1	NM_013483	chr13	23548861	23557760	-	93.053	81.2339	100.704	89.7226	90.9083	130.711	118.361	124.383	103.588	94.2748	98.8213	1.36822	1.36822	0.00273292	0.0323251
6998893	NM_146260 // Tmie // transmembrane inner ear // 9 F3|9 64.0 cM // 20776 /// ENSMUST0000	Tmie	NM_146260	chr9	110767830	110782607	-	173.327	175.931	190.914	170.989	177.625	217.632	237.108	227.161	187.018	172.141	179.425	1.27888	1.27888	0.00273664	0.0323251
6881472	BC034902 // BC034902 // cDNA sequence BC034902 // 2 F3|2 // 228642 /// BC034902 // BC03	BC034902	BC034902	chr2	136327646	136357251	+	125.611	121.793	150.021	124.408	129.991	175.978	198.904	187.09	158.199	133.078	145.097	1.43926	1.43926	0.00274193	0.0323251
6780536	ENSMUST00000060185 // C030019I05Rik // RIKEN cDNA C030019I05 gene // 11 B1.1|11 // 3201	C030019I05Rik	ENSMUST00000060185	chr11	46049053	46053373	+	69.1343	66.4257	57.6313	59.8434	63.0848	86.7264	90.425	88.5561	68.3244	82.9138	75.2662	1.40376	1.40376	0.00274309	0.0323251
6751506	---	---	---	chr1	92571736	92576368	+	106.717	103.423	130.191	108.88	111.84	154.324	150.838	152.571	117.19	117.26	117.225	1.3642	1.3642	0.00274657	0.0323251
7009920	NM_026096 // 1700054O13Rik // RIKEN cDNA 1700054O13 gene // X|X A1.2 // 67334 /// ENSMU	1700054O13Rik	NM_026096	chrX	9424070	9424629	+	216.138	230.867	251.409	234.204	232.818	293.666	294.965	294.316	217.934	213.643	215.777	1.26414	1.26414	0.00275209	0.0323251
6885381	ENSMUST00000006638 // Slc34a3 // solute carrier family 34 (sodium phosphate), member 3	Slc34a3	ENSMUST00000006638	chr2	25084419	25089862	-	170.875	181.93	196.944	170.5	179.748	223.99	238.949	231.348	178.854	182.181	180.509	1.28708	1.28708	0.00275285	0.0323251
6837425	ENSMUST00000018184 // Rrp7a // ribosomal RNA processing 7 homolog A (S. cerevisiae) //	Rrp7a	ENSMUST00000018184	chr15	82943863	82953216	-	680.348	645.695	656.668	652.258	658.614	781.131	818.807	799.747	688.861	667.433	678.06	1.21429	1.21429	0.00275429	0.0323251
6791328	ENSMUST00000017732 // Krt27 // keratin 27 // 11 D|11 57.85 cM // 16675 /// NM_010666 //	Krt27	ENSMUST00000017732	chr11	99201058	99212418	-	74.5161	78.3412	83.2368	73.6774	77.3522	94.0894	109.402	101.457	78.8528	81.0483	79.943	1.31163	1.31163	0.00275553	0.0323251
6836694	NM_020519 // Slurp1 // secreted Ly6/Plaur domain containing 1 // 15 D3|15 // 57277 ///	Slurp1	NM_020519	chr15	74554748	74558464	-	159.752	127.142	164.112	140.478	147.103	224.634	216.033	220.291	176.52	142.633	158.674	1.49753	1.49753	0.0027561	0.0323251
6748688	BC147491 // Vwa3b // von Willebrand factor A domain containing 3B // 1 B|1 // 70853 ///	Vwa3b	BC147491	chr1	37083441	37133840	+	137.217	131.558	148.757	116.603	133.024	187.701	176.231	181.875	129.871	127.23	128.543	1.36724	1.36724	0.00275643	0.0323251
6771309	NM_016847 // Avpr1a // arginine vasopressin receptor 1A // 10|10 D3 // 54140 /// ENSMUS	Avpr1a	NM_016847	chr10	121885555	121890841	+	124.983	117.229	109.551	124.962	119.006	155.106	177.742	166.039	124.267	102.501	112.861	1.39521	1.39521	0.00276005	0.0323251
6922294	NM_010616 // Kif12 // kinesin family member 12 // 4|4 C1 // 16552 /// ENSMUST0000003004	Kif12	NM_010616	chr4	62820104	62846613	-	142.137	144.876	152.289	130.433	142.213	175.665	205.66	190.072	140.174	132.933	136.506	1.33653	1.33653	0.00276137	0.0323251
6925273	NM_153159 // Zc3h12a // zinc finger CCCH type containing 12A // 4 D2.2|4 // 230738 ///	Zc3h12a	NM_153159	chr4	124786680	124805108	-	213.821	209.851	193.9	192.317	202.251	252.105	256.025	254.057	210.076	199.15	204.54	1.25615	1.25615	0.00276207	0.0323251
6959589	NR_036630 // Gm1082 // predicted gene 1082 // 7 B1|7 // 100504207 /// NR_036630 // Gm10	Gm1082	NR_036630	chr7	31300141	31307221	+	163.937	182.506	196.525	173.525	178.724	224.273	262.936	242.836	181.668	174.421	178.008	1.35872	1.35872	0.0027646	0.0323251
6782099	NM_007493 // Asgr2 // asialoglycoprotein receptor 2 // 11 B3|11 37.0 cM // 11890 /// EN	Asgr2	NM_007493	chr11	69906156	69927742	+	98.4507	96.0384	104.402	83.792	95.3658	126.692	133.176	129.893	89.3447	98.5108	93.8159	1.36205	1.36205	0.0027649	0.0323251
6957758	ENSMUST00000032341 // Art4 // ADP-ribosyltransferase 4 // 6 G1|6 66.5 cM // 109978 ///	Art4	ENSMUST00000032341	chr6	136794458	136806234	-	115.818	103.452	123.729	105.323	111.783	160.139	188.373	173.684	133.701	98.4016	114.701	1.55375	1.55375	0.00276572	0.0323251
6760446	NM_001111314 // Ngef // neuronal guanine nucleotide exchange factor // 1 D|1 54.0 cM //	Ngef	NM_001111314	chr1	89373415	89470499	-	193.343	213.997	250.103	188.727	210.219	295.458	319.446	307.218	191.95	210.068	200.805	1.46142	1.46142	0.00276968	0.0323251
6992469	NM_153172 // Prss45 // protease, serine, 45 // 9 F3|9 // 260408 /// ENSMUST00000011391	Prss45	NM_153172	chr9	110737092	110743814	+	128.941	126.869	137.53	117.243	127.44	176.801	169.544	173.135	131.989	109.471	120.204	1.35855	1.35855	0.00277599	0.0323494
6847690	ENSMUST00000095934 // Krtap26-1 // keratin associated protein 26-1 // 16 C3.3|16 // 695	Krtap26-1	ENSMUST00000095934	chr16	88647068	88648223	-	62.5648	72.1046	69.2345	59.926	65.7747	87.7198	105.251	96.0864	73.819	61.1839	67.2052	1.46084	1.46084	0.00280922	0.0326867
6864370	ENSMUST00000134663 // Myo7b // myosin VIIB // 18 B1|18 14.0 cM // 17922 /// NM_032394 /	Myo7b	ENSMUST00000134663	chr18	32118512	32211309	-	123.163	122.851	134.655	112.442	123.028	155.594	164.387	159.93	126.688	120.712	123.664	1.29995	1.29995	0.00281413	0.0326941
6963191	NM_146355 // Olfr692 // olfactory receptor 692 // 7 E3|7 // 258352 /// ENSMUST000000981	Olfr692	NM_146355	chr7	112487551	112517831	+	207.401	203.299	233.494	175.098	203.763	283.087	288.729	285.893	203.191	203.612	203.401	1.40307	1.40307	0.0028252	0.0327257
6960248	NM_010915 // Klk1b4 // kallikrein 1-related pepidase b4 // 7 B4|7 23.02 cM // 18048 ///	Klk1b4	NM_010915	chr7	51462782	51467114	+	66.9754	50.066	66.1386	87.112	66.2974	125.313	127.685	126.494	94.0594	70.7437	81.5724	1.90797	1.90797	0.00282541	0.0327257
6942087	---	---	---					254.376	257.947	271.63	247.292	257.661	341.841	314.994	328.143	305.312	274.024	289.245	1.27355	1.27355	0.00283908	0.0328343
6903062	NM_031190 // Pgk2 // phosphoglycerate kinase 2 // 17 B2|17 20.8 cM // 18663 /// ENSMUST	Pgk2	NM_031190	chr17	40343966	40345565	-	36.7298	37.3602	28.8542	39.1307	35.2808	50.6574	62.8195	56.4116	43.0947	35.9747	39.3742	1.59893	1.59893	0.00285132	0.0328471
6984926	NM_007663 // Cdh16 // cadherin 16 // 8 D3|8 50.0 cM // 12556 /// ENSMUST00000034352 //	Cdh16	NM_007663	chr8	107122346	107148276	-	114.488	114.49	138.354	106.372	117.852	163.3	164.214	163.756	120.386	114.963	117.643	1.38951	1.38951	0.00285268	0.0328471
6917032	NM_011141 // Pou3f1 // POU domain, class 3, transcription factor 1 // 4 D2.2|4 56.1 cM	Pou3f1	NM_011141	chr4	124272287	124352288	+	319.019	314.752	362.903	285.596	319.398	432.384	433.113	432.75	316.245	297.379	306.667	1.35489	1.35489	0.00285308	0.0328471
6829945	NM_025494 // Atp6v1c1 // ATPase, H+ transporting, lysosomal V1 subunit C1 // 15|15 C //	Atp6v1c1	NM_025494	chr15	38573396	38745886	+	1127.96	1122.58	1101.08	1177.82	1132.03	921.474	948.465	934.875	1045.37	1037.65	1041.54	0.825849	-1.21087	0.00285997	0.032875
6823690	ENSMUST00000006697 // Itih3 // inter-alpha trypsin inhibitor, heavy chain 3 // 14|14 A2	Itih3	ENSMUST00000006697	chr14	31721758	31736926	-	90.4194	96.8399	107.935	93.4297	96.9373	121.074	141.533	130.904	96.249	95.3176	95.7818	1.3504	1.3504	0.00286557	0.032875
6790531	NM_001005341 // Ypel2 // yippee-like 2 (Drosophila) // 11 C|11 // 77864 /// ENSMUST0000	Ypel2	NM_001005341	chr11	86752632	86807248	-	1261.92	1253.63	1349.3	1278.73	1285.4	1018.56	1074.61	1046.24	1315.5	1257.38	1286.11	0.813949	-1.22858	0.0028684	0.032875
6918138	NM_177867 // Spata21 // spermatogenesis associated 21 // 4 D3|4 // 329972 /// ENSMUST00	Spata21	NM_177867	chr4	140644260	140668675	+	161.802	178.616	199.44	161.964	174.797	230.955	243.629	237.208	175.39	169.926	172.636	1.35704	1.35704	0.00287879	0.0328962
6856695	ENSMUST00000143987 // Ndufv2 // NADH dehydrogenase (ubiquinone) flavoprotein 2 // 17|17	Ndufv2	ENSMUST00000143987	chr17	66426452	66450879	-	3272.78	3491.42	3475.25	3841.36	3514.25	2767.18	2274.45	2508.83	3426.93	3934.05	3671.62	0.713854	-1.40085	0.00287886	0.0328962
6973555	NM_146389 // Olfr1350 // olfactory receptor 1350 // 7 A1|7 // 258384 /// ENSMUST0000007	Olfr1350	NM_146389	chr7	6517572	6523618	+	174.479	154.773	122.965	166.931	153.44	247.221	231.892	239.433	123.576	142.274	132.596	1.56044	1.56044	0.00288371	0.032898
6946912	NM_009858 // Cd8b1 // CD8 antigen, beta chain 1 // 6 C1|6 30.5 cM // 12526 /// ENSMUST0	Cd8b1	NM_009858	chr6	71272712	71302024	+	100.446	111.631	113.904	104.117	107.385	141.467	153.727	147.469	95.9679	118.106	106.463	1.37328	1.37328	0.00289014	0.032898
6823869	ENSMUST00000052164 // Ppyr1 // pancreatic polypeptide receptor 1 // 14 B|14 10.5 cM //	Ppyr1	ENSMUST00000052164	chr14	34957178	34966882	-	75.8249	79.7946	91.5419	73.1512	79.7825	117.373	104.932	110.978	71.9359	78.9589	75.3659	1.39101	1.39101	0.00289523	0.032898
6851187	NM_145490 // Zfp959 // zinc finger protein 959 // 17 D|17 // 224893 /// ENSMUST00000054	Zfp959	NM_145490	chr17	56031536	56038355	+	366.117	325.468	301.28	305.854	323.708	215.38	224.47	219.878	276.321	361.186	315.917	0.679249	-1.47221	0.00289623	0.032898
6943796	ENSMUST00000031673 // Gngt1 // guanine nucleotide binding protein (G protein), gamma tr	Gngt1	ENSMUST00000031673	chr6	3943827	3947436	+	16.1418	17.8435	17.6376	17.6832	17.3125	22.7209	31.5116	26.7577	21.4239	17.4829	19.3533	1.54557	1.54557	0.00291208	0.0329014
6985975	NM_020564 // Sult5a1 // sulfotransferase family 5A, member 1 // 8 E1|8 // 57429 /// ENS	Sult5a1	NM_020564	chr8	125655471	125682170	-	512.678	543.833	543.814	556.312	538.914	657.428	787.437	719.505	536.781	477.164	506.093	1.3351	1.3351	0.0029186	0.0329014
6929482	NM_008314 // Htr5a // 5-hydroxytryptamine (serotonin) receptor 5A // 5 A3-B|5 15.0 cM /	Htr5a	NM_008314	chr5	28168370	28180132	+	205.119	216.282	235.403	204.417	214.95	276.095	273.677	274.882	211.785	198.469	205.02	1.27882	1.27882	0.00292129	0.0329014
6755787	ENSMUST00000097446 // Dnahc14 // dynein, axonemal, heavy chain 14 // 1 H5|1 // 240960 /	Dnahc14	ENSMUST00000097446	chr1	183669052	183694102	+	46.2201	47.3896	45.5466	40.9843	44.9672	55.2989	67.5395	61.1135	43.2522	42.8214	43.0362	1.35907	1.35907	0.00292616	0.0329014
6892787	NM_026630 // Gtsf1l // gametocyte specific factor 1-like // 2|2 H3 // 68236 /// ENSMUST	Gtsf1l	NM_026630	chr2	162912779	162923521	-	112.237	101.959	105.941	118.103	109.389	152.906	159.871	156.349	118.593	90.7025	103.714	1.42931	1.42931	0.00293662	0.0329014
7010750	ENSMUST00000006362 // Rhox6 // reproductive homeobox 6 // X A3.3|X // 19202 /// NM_0089	Rhox6	ENSMUST00000006362	chrX	35175544	35192539	+	113.34	109.606	117.849	117.39	114.497	136.319	156.086	145.868	113.807	107.456	110.586	1.274	1.274	0.0029367	0.0329014
6960179	NM_011872 // Klk7 // kallikrein related-peptidase 7 (chymotryptic, stratum corneum) //	Klk7	NM_011872	chr7	51066674	51071743	+	117.164	128.361	127.875	123.876	124.236	152.242	189.916	170.039	128.457	116.389	122.274	1.36867	1.36867	0.00294453	0.0329014
6960500	ENSMUST00000014545 // Ldhc // lactate dehydrogenase C // 7 B4|7 23.5 cM // 16833 /// NM	Ldhc	ENSMUST00000014545	chr7	54116593	54133512	+	61.9156	61.4061	67.7956	57.9409	62.1654	76.4582	84.0555	80.1666	57.2629	58.6021	57.9284	1.28957	1.28957	0.00294464	0.0329014
6885015	NM_026627 // H2afb1 // H2A histone family, member B1 // 2|2 // 68231 /// ENSMUST0000010	H2afb1	NM_026627	chr2	17918057	17918575	-	325.402	265.767	349.471	324.083	314.592	429.773	534.446	479.258	320.411	367.971	343.368	1.52343	1.52343	0.00294607	0.0329014
6978803	ENSMUST00000093221 // Ces3b // carboxylesterase 3B // 8 D3|8 // 13909 /// NM_144511 //	Ces3b	ENSMUST00000093221	chr8	107607633	107617809	+	69.552	68.3434	76.8157	66.0451	70.077	87.3781	93.8699	90.5661	69.9024	75.3419	72.5714	1.29238	1.29238	0.002955	0.0329014
6875039	ENSMUST00000078834 // Il15ra // interleukin 15 receptor, alpha chain // 2 A1|2 6.4 cM /	Il15ra	ENSMUST00000078834	chr2	11626826	11655708	+	171.952	163.77	181.704	157.962	168.613	213.618	223.477	218.493	190.469	169.78	179.826	1.29582	1.29582	0.00295731	0.0329014
6814348	ENSMUST00000022048 // Slc6a19 // solute carrier family 6 (neurotransmitter transporter)	Slc6a19	ENSMUST00000022048	chr13	73817195	73891198	-	102.002	101.098	113.939	87.2045	100.61	135.952	144.31	140.069	102.343	109.753	105.983	1.3922	1.3922	0.00295845	0.0329014
6833478	ENSMUST00000001711 // Hoxc6 // homeobox C6 // 15 E2|15 57.4 cM // 15425 /// NM_010465 /	Hoxc6	ENSMUST00000001711	chr15	102830978	102842313	+	74.8993	80.5069	76.9511	73.6304	76.4529	96.0904	137.439	114.92	77.2766	80.343	78.7949	1.50314	1.50314	0.0029617	0.0329014
6882462	NM_172860 // Cbfa2t2 // core-binding factor, runt domain, alpha subunit 2, translocated	Cbfa2t2	NM_172860	chr2	154262248	154365481	+	1681.11	1787.47	1653.26	1653.26	1692.92	1417.27	1348.09	1382.25	1630.5	1641.61	1636.05	0.8165	-1.22474	0.00296226	0.0329014
6766444	NR_045843 // Gm5420 // predicted gene 5420 // 10 A3|10 // 432436 /// NR_045843 // Gm542	Gm5420	NR_045843	chr10	21406237	21427289	+	69.0874	64.786	72.8653	55.7802	65.3086	89.9231	91.9865	90.9486	66.9986	65.6986	66.3452	1.3926	1.3926	0.00296946	0.0329014
6844373	---	---	---	chr16	19195092	19283356	-	39.16	47.8634	42.7274	40.9531	42.556	54.0908	68.0819	60.6842	44.1597	43.2971	43.7263	1.42599	1.42599	0.00297141	0.0329014
6975889	BC049135 // 4933411K20Rik // RIKEN cDNA 4933411K20 gene // 8 B2|8 27.0 cM // 66756 ///	4933411K20Rik	BC049135	chr8	47238409	47280932	+	533.265	506.171	512.714	549.963	525.246	435.187	423.962	429.537	540.215	523.904	531.995	0.817784	-1.22282	0.00297427	0.0329014
6896557	NM_028231 // Kcnmb2 // potassium large conductance calcium-activated channel, subfamily	Kcnmb2	NM_028231	chr3	31801439	32099092	+	123.979	121.999	136.103	132.788	128.582	175.716	157.273	166.24	130.622	119.888	125.14	1.29286	1.29286	0.00297555	0.0329014
6951440	NM_015829 // Slc25a13 // solute carrier family 25 (mitochondrial carrier, adenine nucle	Slc25a13	NM_015829	chr6	5991218	6167173	-	575.376	544.112	555.245	617.729	572.44	468.226	444.534	456.228	533.942	526.697	530.306	0.796984	-1.25473	0.0029783	0.0329014
6750519	ENSMUST00000027372 // Cxcr2 // chemokine (C-X-C motif) receptor 2 // 1 C3|1 40.0 cM //	Cxcr2	ENSMUST00000027372	chr1	74200075	74207820	+	98.42	93.9434	93.4155	102.066	96.8977	116.727	125.02	120.802	101.441	95.6697	98.5135	1.2467	1.2467	0.00298304	0.0329021
6835429	NM_176998 // Sybu // syntabulin (syntaxin-interacting) // 15 B3.2|15 // 319613 /// NM_0	Sybu	NM_176998	chr15	44592546	44619631	-	209.463	196.567	234.025	223.797	215.493	283.662	327.448	304.769	260.5	215.211	236.775	1.41429	1.41429	0.00298701	0.0329021
6987267	NM_146566 // Olfr830 // olfactory receptor 830 // 9 A2-A5|9 // 258559 /// ENSMUST000000	Olfr830	NM_146566	chr9	18623833	18715157	+	13.0869	11.9076	14.6991	12.8434	13.0966	18.9457	17.3512	18.1309	16.119	13.7994	14.9142	1.3844	1.3844	0.0029922	0.0329021
6809880	NM_008308 // Htr1a // 5-hydroxytryptamine (serotonin) receptor 1A // 13 D1|13 58.0 cM /	Htr1a	NM_008308	chr13	106188401	106241837	+	112.01	109.562	105.547	111.718	109.678	130.74	160.259	144.749	103.727	99.1513	101.413	1.31976	1.31976	0.00301191	0.0329021
6901331	NM_007686 // Cfi // complement component factor i // 3 G3|3 66.6 cM // 12630 /// ENSMUS	Cfi	NM_007686	chr3	129539682	129578245	+	39.0137	37.7829	43.1357	37.7174	39.3527	48.1545	56.396	52.1126	44.5681	43.1315	43.8438	1.32425	1.32425	0.0030121	0.0329021
6824566	NM_207558 // Olfr750 // olfactory receptor 750 // 14 C1|14 // 404319 /// ENSMUST0000004	Olfr750	NM_207558	chr14	51690071	51714820	-	57.9738	48.3918	82.6676	56.9108	60.2747	100.634	131.106	114.864	67.1097	77.6309	72.1791	1.90569	1.90569	0.00301244	0.0329021
6848568	ENSMUST00000064234 // Ezr // ezrin // 17 A1|17 // 22350 /// NM_009510 // Ezr // ezrin /	Ezr	ENSMUST00000064234	chr17	6942403	7032515	-	1188.73	1165.72	1167.9	1207.33	1182.32	921.002	1009.8	964.381	1060.33	1020.42	1040.17	0.815683	-1.22597	0.00303171	0.0329021
6832294	NM_054088 // Pnpla3 // patatin-like phospholipase domain containing 3 // 15|15 E3 // 11	Pnpla3	NM_054088	chr15	83998266	84019934	+	282.816	267.855	315.038	271.412	283.694	375.503	366.381	370.914	300.477	272.154	285.964	1.30745	1.30745	0.00303181	0.0329021
6875744	NM_007947 // Lcn5 // lipocalin 5 // 2|2 // 13863 /// ENSMUST00000028306 // Lcn5 // lipo	Lcn5	NM_007947	chr2	25513475	25517477	+	66.1257	65.6116	69.8525	64.6814	66.5391	90.7893	78.7648	84.5633	65.3833	63.2135	64.2894	1.27088	1.27088	0.0030427	0.0329021
6829687	ENSMUST00000049742 // Kcns2 // K+ voltage-gated channel, subfamily S, 2 // 15 B3.1|15 /	Kcns2	ENSMUST00000049742	chr15	34767120	34773142	+	170.653	176.672	164.503	145.039	163.77	227.992	208.144	217.842	168.467	170.376	169.419	1.33017	1.33017	0.0030427	0.0329021
6988324	NM_146326 // Olfr943 // olfactory receptor 943 // 9 A5|9 // 258323 /// ENSMUST000000716	Olfr943	NM_146326	chr9	38973915	38992709	+	9.08005	11.6113	8.60002	8.54109	9.38092	15.5389	14.1305	14.8179	7.97509	9.9764	8.91979	1.57958	1.57958	0.00305355	0.0329021
6894286	ENSMUST00000029106 // Zbtb46 // zinc finger and BTB domain containing 46 // 2 H4|2 // 7	Zbtb46	ENSMUST00000029106	chr2	181122470	181219396	-	206.623	180.483	221.613	196.97	200.865	263.332	292.248	277.413	216.732	187.359	201.512	1.3811	1.3811	0.00305686	0.0329021
6994785	NM_146503 // Olfr952 // olfactory receptor 952 // 9 A5.1|9 // 235248 /// ENSMUST0000007	Olfr952	NM_146503	chr9	39233710	39234654	-	7.52906	9.16846	8.62061	8.93755	8.53985	11.7599	10.965	11.3555	6.81635	7.11276	6.963	1.32971	1.32971	0.00306309	0.0329021
6985328	NM_029646 // Il34 // interleukin 34 // 8 E1|8 // 76527 /// ENSMUST00000150680 // Il34 /	Il34	NM_029646	chr8	113265720	113329862	-	188.527	200.479	213.269	191.704	198.267	241.182	259.676	250.258	200.767	193.815	197.261	1.26223	1.26223	0.00306379	0.0329021
6888538	NM_146641 // Olfr1164 // olfactory receptor 1164 // 2 E1|2 // 258634 /// ENSMUST0000009	Olfr1164	NM_146641	chr2	87933111	87934142	-	27.9865	31.0907	31.9346	27.1319	29.4666	42.33	37.2198	39.6929	26.0218	24.0026	24.9919	1.34704	1.34704	0.00306623	0.0329021
6768899	NM_198635 // Gm5134 // predicted gene 5134 // 10 C1|10 // 333669 /// ENSMUST00000099577	Gm5134	NM_198635	chr10	75413787	75481540	+	98.8974	112.202	113.052	100.136	105.868	135.02	137.3	136.155	106.611	112.865	109.693	1.28609	1.28609	0.00307056	0.0329021
6910126	NM_030601 // Clca2 // chloride channel calcium activated 2 // 3 H2|3 // 80797 /// ENSMU	Clca2	NM_030601	chr3	144426124	144482433	-	61.8564	63.3407	61.9121	60.9891	62.0191	72.8744	78.2663	75.5223	65.0664	61.9156	63.4712	1.21773	1.21773	0.00308101	0.0329021
6849319	NM_001159626 // Hagh // hydroxyacyl glutathione hydrolase // 17 A3.3|17 11.0 cM // 1465	Hagh	NM_001159626	chr17	24977039	25005075	+	519.806	509.942	554.095	557.922	535.031	644.761	675.228	659.816	491.644	492.169	491.906	1.23323	1.23323	0.00308241	0.0329021
7015307	NM_010850 // Mycs // myc-like oncogene, s-myc protein // X A1.1|X 1.0 cM // 17870 /// E	Mycs	NM_010850	chrX	5044847	5046363	-	231.685	235.829	274.648	198.961	233.754	347.074	394.795	370.166	280.843	216.647	246.665	1.58357	1.58357	0.00308525	0.0329021
6958724	NM_134229 // Vmn1r67 // vomeronasal 1 receptor 67 // 7 A1|7 // 171263 /// ENSMUST000000	Vmn1r67	NM_134229	chr7	11032160	11053149	+	24.099	30.13	26.4526	25.272	26.3953	34.7033	44.0485	39.0977	31.1856	27.3874	29.225	1.48123	1.48123	0.00308881	0.0329021
6973098	NM_146916 // Olfr1346 // olfactory receptor 1346 // 7 A1|7 // 258918 /// ENSMUST0000005	Olfr1346	NM_146916	chr7	6426823	6427764	+	81.6211	80.8917	96.856	80.6029	84.7317	117.617	109.252	113.358	85.9389	81.0185	83.4425	1.33784	1.33784	0.00309037	0.0329021
6849921	NM_153063 // Zfp472 // zinc finger protein 472 // 17 B1|17 // 224691 /// ENSMUST0000003	Zfp472	NM_153063	chr17	33102542	33116160	+	175.762	182.143	163.037	173.963	173.589	143.743	129.994	136.695	158.416	170.226	164.215	0.78747	-1.26989	0.00309308	0.0329021
6754536	NM_009452 // Tnfsf4 // tumor necrosis factor (ligand) superfamily, member 4 // 1 H2.1|1	Tnfsf4	NM_009452	chr1	163212600	163374314	+	59.3136	60.3729	68.0183	63.4901	62.7094	78.2804	99.419	88.2185	66.8196	60.3851	63.5209	1.40679	1.40679	0.00310355	0.0329021
6989403	NM_133982 // Rpp25 // ribonuclease P 25 subunit (human) // 9 B|9 // 102614 /// ENSMUST0	Rpp25	NM_133982	chr9	57351220	57353255	+	196.66	184.214	196.854	168.923	186.302	232.752	251.299	241.847	213.983	203.772	208.815	1.29815	1.29815	0.00310515	0.0329021
6833305	NM_009612 // Acvrl1 // activin A receptor, type II-like 1 // 15|15 F3 // 11482 /// ENSM	Acvrl1	NM_009612	chr15	100952584	100975767	+	670.001	644.019	669.973	702.045	671.196	802.407	855.124	828.346	708.508	668.888	688.413	1.23413	1.23413	0.0031071	0.0329021
6944951	ENSMUST00000031719 // Fscn3 // fascin homolog 3, actin-bundling protein, testicular (St	Fscn3	ENSMUST00000031719	chr6	28377789	28388613	+	70.3198	69.0438	79.1167	69.5395	71.891	91.9266	89.7749	90.844	84.2357	85.9407	85.0842	1.26364	1.26364	0.00310752	0.0329021
6775376	NM_026094 // Atp8b3 // ATPase, class I, type 8B, member 3 // 10 C1|10 // 67331 /// ENSM	Atp8b3	NM_026094	chr10	79982330	80001869	-	100.519	106.311	117.879	93.1879	104.089	140.454	143.278	141.859	110.838	100.553	105.57	1.36286	1.36286	0.0031158	0.0329021
6840123	NM_001004151 // Rtp1 // receptor transporter protein 1 // 16 B1|16 // 239766 /// ENSMUS	Rtp1	NM_001004151	chr16	23420813	23433918	+	89.2611	90.9316	90.2109	70.335	84.7135	123.591	125.537	124.56	108.016	90.6277	98.9405	1.47037	1.47037	0.00311594	0.0329021
6782703	ENSMUST00000001130 // Sebox // SEBOX homeobox // 11 B5|11 45.0 cM // 18292 /// NM_00875	Sebox	ENSMUST00000001130	chr11	78316969	78318563	+	192.688	218.809	234.079	223.484	216.711	283.586	283.635	283.611	212.484	201.854	207.101	1.3087	1.3087	0.00311836	0.0329021
6935484	NM_027069 // 1700018F24Rik // RIKEN cDNA 1700018F24 gene // 5 G2|5 // 69396 /// ENSMUST	1700018F24Rik	NM_027069	chr5	145803859	145806547	+	24.6947	30.082	23.6029	21.2336	24.7016	38.2477	63.7728	49.388	30.5485	23.0036	26.509	1.99938	1.99938	0.00312177	0.0329021
6947383	NM_033606 // Dqx1 // DEAQ RNA-dependent ATPase // 6 D1|6 35.0 cM // 93838 /// ENSMUST00	Dqx1	NM_033606	chr6	83007838	83017422	+	145.062	148.243	148.921	142.532	146.167	172.306	191.663	181.727	146.84	137.421	142.052	1.24329	1.24329	0.00312199	0.0329021
6878406	NM_177843 // Gm14461 // predicted gene 14461 // 2 C3|2 // 329436 /// NM_177843 // Gm144	Gm14461	NM_177843	chr2	78077714	78142520	+	56.218	62.37	63.535	63.7441	61.3869	76.533	79.518	78.0112	56.8508	61.4329	59.0977	1.27081	1.27081	0.00312214	0.0329021
6825305	NM_008092 // Gata4 // GATA binding protein 4 // 14 D1|14 28.0 cM // 14463 /// ENSMUST00	Gata4	NM_008092	chr14	63817760	63922009	-	219.329	233.711	239.918	233.411	231.467	277.707	287.056	282.342	221.34	218.793	220.063	1.2198	1.2198	0.00312374	0.0329021
6889719	NM_146885 // Olfr1294 // olfactory receptor 1294 // 2 E5|2 // 258887 /// ENSMUST0000009	Olfr1294	NM_146885	chr2	111377506	111380999	-	10.1249	11.0688	10.784	9.96859	10.4768	18.5164	15.4812	16.9309	15.1743	10.1429	12.4061	1.61605	1.61605	0.00313148	0.0329021
6833468	NM_010462 // Hoxc10 // homeobox C10 // 15 F3|15 57.4 cM // 209448 /// ENSMUST0000000169	Hoxc10	NM_010462	chr15	102797208	102802321	+	61.3045	66.9262	62.557	55.4117	61.4104	79.2918	112.821	94.5824	60.935	57.9284	59.4127	1.54017	1.54017	0.00313283	0.0329021
6775240	NM_009646 // Aire // autoimmune regulator (autoimmune polyendocrinopathy candidiasis ec	Aire	NM_009646	chr10	77482366	77506332	-	234.041	244.59	287.895	240.238	250.843	332.777	338.861	335.805	259.946	242.703	251.177	1.33871	1.33871	0.00313331	0.0329021
6974126	NM_010172 // F7 // coagulation factor VII // 8 A1.1|8 7.0 cM // 14068 /// ENSMUST000000	F7	NM_010172	chr8	13026020	13035805	+	104.361	112.06	123.157	103.453	110.484	138.445	158.633	148.196	109.861	106.102	107.966	1.34134	1.34134	0.00313831	0.0329093
6855228	NM_182714 // Olfr91 // olfactory receptor 91 // 17 B1|17 // 258470 /// ENSMUST000000871	Olfr91	NM_182714	chr17	37229879	37230817	-	83.4407	90.9644	80.9029	81.3889	84.0805	106.757	111.062	108.889	114.303	99.4025	106.593	1.29505	1.29505	0.00314481	0.0329324
6965069	NM_177469 // Gpr123 // G protein-coupled receptor 123 // 7 F4|7 68.0 cM // 52389 /// EN	Gpr123	NM_177469	chr7	147017731	147063987	+	213.583	206.26	241.268	227.161	221.669	278.613	287.971	283.254	255.249	244.156	249.641	1.27783	1.27783	0.00316611	0.0330752
6841168	NM_026402 // Atg3 // autophagy related 3 // 16|16 B5 // 67841 /// ENSMUST00000023343 //	Atg3	NM_026402	chr16	45158794	45188651	+	862.099	999.997	903.806	1001.09	939.78	723.681	639.925	680.518	909.935	1079.61	991.15	0.724122	-1.38098	0.0031671	0.0330752
6978727	NM_001037841 // Cklf // chemokine-like factor // 8 D3|8 // 75458 /// ENSMUST00000098464	Cklf	NM_001037841	chr8	106774762	106808426	+	1000.05	974.4	955.83	1065.86	998.176	739.517	821.809	779.578	940.269	1029.84	984.031	0.780998	-1.28041	0.00318524	0.0331989
6904266	NM_178418 // Ccdc144b // coiled-coil domain containing 144B // 3 B|3 // 241943 /// ENSM	Ccdc144b	NM_178418	chr3	35906169	35952518	-	33.4492	33.6207	31.4751	27.5995	31.4387	39.9732	47.2928	43.4794	32.0204	32.6255	32.3214	1.38298	1.38298	0.00318763	0.0331989
6849323	ENSMUST00000168131 // Igfals // insulin-like growth factor binding protein, acid labile	Igfals	ENSMUST00000168131	chr17	25013921	25018954	+	50.3078	58.8757	58.6862	49.5245	54.1665	81.7134	70.9416	76.1372	55.1134	48.3593	51.6258	1.40561	1.40561	0.00320293	0.0333128
6941739	BC019498 // 1500011H22Rik // RIKEN cDNA 1500011H22 gene // 5 F|5 // 68948 /// BC019498	1500011H22Rik	BC019498	chr5	122814592	122822364	-	1399.8	1406.51	1334.79	1428.61	1391.96	1087.2	1171.47	1128.59	1242.99	1328.52	1285.04	0.810748	-1.23343	0.00321374	0.0333799
6912022	NM_025476 // Fam82b // family with sequence similarity 82, member B // 4 A3|4 // 66302	Fam82b	NM_025476	chr4	19502158	19578257	+	717.115	751.62	646.672	799.115	726.475	515.933	554.099	534.676	683.691	772.553	726.762	0.735987	-1.35872	0.00322406	0.0334416
6750440	NM_008342 // Igfbp2 // insulin-like growth factor binding protein 2 // 1 C3|1 36.1 cM /	Igfbp2	NM_008342	chr1	72840313	72899038	+	1416.39	1245.92	1377.56	1373.27	1351.74	1696.68	2366.44	2003.77	1351.64	1280.51	1315.6	1.48239	1.48239	0.00323433	0.033455
6875564	NM_001004761 // Gpr158 // G protein-coupled receptor 158 // 2 A3|2 // 241263 /// ENSMUS	Gpr158	NM_001004761	chr2	21263243	21752171	+	79.2984	76.8003	93.6405	73.7315	80.5258	116.943	106.035	111.356	87.7642	82.2657	84.9705	1.38285	1.38285	0.00323696	0.033455
6785608	NM_172439 // Inpp5j // inositol polyphosphate 5-phosphatase J // 11 A1|11 // 170835 ///	Inpp5j	NM_172439	chr11	3394293	3407820	-	146.052	150.243	164.559	138.733	149.607	189.945	191.237	190.59	141.481	141.305	141.393	1.27394	1.27394	0.00324664	0.033455
6833094	NM_001201322 // 4930415O20Rik // RIKEN cDNA 4930415O20 gene // 15|15 F2 // 73863 /// EN	4930415O20Rik	NM_001201322	chr15	98401435	98420735	+	29.6251	32.7995	35.4583	31.2482	32.2121	47.9979	42.7399	45.2925	40.697	33.0473	36.6733	1.40608	1.40608	0.00325546	0.033455
6984372	NM_144930 // Ces1f // carboxylesterase 1F // 8 C5|8 // 234564 /// ENSMUST00000034178 //	Ces1f	NM_144930	chr8	95780138	95803626	-	33.1331	35.0128	36.8132	33.677	34.6302	44.7461	41.7467	43.2204	35.3025	37.2069	36.2422	1.24805	1.24805	0.00325561	0.033455
6832010	NM_145986 // Fam83f // family with sequence similarity 83, member F // 15 E1|15 // 2139	Fam83f	NM_145986	chr15	80501783	80530852	+	215.588	257.211	234.028	257.829	240.508	306.542	399.165	349.801	223.088	237.297	230.083	1.45443	1.45443	0.00327006	0.033455
6971033	NM_012016 // Ern2 // endoplasmic reticulum (ER) to nucleus signalling 2 // 7 F3|7 59.0	Ern2	NM_012016	chr7	129313462	129355106	-	159.817	167.814	178.764	157.658	165.81	205.142	207.846	206.489	168.138	165.392	166.759	1.24534	1.24534	0.00327392	0.033455
6805397	NM_134069 // Slc17a3 // solute carrier family 17 (sodium phosphate), member 3 // 13 A3.	Slc17a3	NM_134069	chr13	23931270	23951609	+	54.5834	56.2371	65.0821	57.5303	58.2251	73.5396	82.2891	77.7915	69.1084	62.7316	65.8426	1.33605	1.33605	0.003275	0.033455
6947936	ENSMUST00000130418 // Aldh1l1 // aldehyde dehydrogenase 1 family, member L1 // 6 D1|6 /	Aldh1l1	ENSMUST00000130418	chr6	90436441	90550187	+	129.638	138.492	150.148	134.39	137.962	174.676	178.821	176.737	136.404	123.505	129.795	1.28105	1.28105	0.0032794	0.033455
6860135	NM_025594 // Zmat2 // zinc finger, matrin type 2 // 18 B2|18 // 66492 /// ENSMUST000000	Zmat2	NM_025594	chr18	36953548	36959314	+	1400.09	1458.13	1439.85	1502.24	1449.56	1205.57	1194.26	1199.9	1343.52	1396.69	1369.85	0.82774	-1.20811	0.00328124	0.033455
6835415	NM_026149 // Nudcd1 // NudC domain containing 1 // 15 B3.2|15 // 67429 /// NM_001113554	Nudcd1	NM_026149	chr15	44206775	44259843	-	772.794	832.075	772.077	858.248	807.932	648.216	615.865	631.833	739.82	830.278	783.745	0.782038	-1.27871	0.00329276	0.033455
6868145	NM_146410 // Olfr1420 // olfactory receptor 1420 // 19 C1|19 // 258405 /// ENSMUST00000	Olfr1420	NM_146410	chr19	11953885	11971442	+	62.6907	63.2073	49.0908	53.8006	56.8773	78.9376	83.803	81.3336	67.5213	60.9371	64.1448	1.42999	1.42999	0.00329552	0.033455
6792373	ENSMUST00000092464 // AF251705 // cDNA sequence AF251705 // 11 E2|11 78.0 cM // 140497	AF251705	ENSMUST00000092464	chr11	114858035	114863194	-	89.8664	78.9534	91.3555	78.617	84.4901	108.834	114.199	111.484	74.5977	81.9675	78.1958	1.31949	1.31949	0.00330089	0.033455
6933970	ENSMUST00000066540 // Sds // serine dehydratase // 5 F|5 // 231691 /// NM_145565 // Sds	Sds	ENSMUST00000066540	chr5	120926552	120933941	+	119.562	115.7	137.785	110.353	120.428	166.973	163.316	165.135	134.833	117.214	125.715	1.37123	1.37123	0.00330765	0.033455
6785450	NM_008101 // Gcgr // glucagon receptor // 11 E2|11 // 14527 /// ENSMUST00000026119 // G	Gcgr	NM_008101	chr11	120384221	120401540	+	119.186	124.092	127.518	122.557	123.302	149.267	148.155	148.709	122.891	127.532	125.19	1.20606	1.20606	0.00330851	0.033455
6908775	NM_145394 // Slc44a3 // solute carrier family 44, member 3 // 3 G1|3 // 213603 /// ENSM	Slc44a3	NM_145394	chr3	121162446	121235287	-	217.214	193.331	185.385	206.989	200.357	152.671	161.054	156.806	170.038	171.839	170.936	0.782638	-1.27773	0.00330915	0.033455
6813585	NM_022317 // Slc28a3 // solute carrier family 28 (sodium-coupled nucleoside transporter	Slc28a3	NM_022317	chr13	58646838	58745917	-	92.5461	81.6239	90.1828	84.717	87.1603	106.406	115.133	110.684	89.4382	84.1878	86.7733	1.26989	1.26989	0.00331486	0.033455
6789958	ENSMUST00000108294 // Foxn1 // forkhead box N1 // 11 B5|11 45.0 cM // 15218 /// NM_0082	Foxn1	ENSMUST00000108294	chr11	78171591	78200060	-	209.204	197.356	232.08	210.353	211.885	262.177	304.604	282.595	208.137	190.751	199.255	1.33371	1.33371	0.00331855	0.033455
6961099	NM_001039104 // Trpm1 // transient receptor potential cation channel, subfamily M, memb	Trpm1	NM_001039104	chr7	71298741	71414811	+	63.1386	66.6342	71.2254	57.9618	64.5569	84.5844	85.3873	84.9846	65.3778	61.4845	63.4013	1.31644	1.31644	0.00332209	0.033455
6971600	NM_008411 // Cuzd1 // CUB and zona pellucida-like domains 1 // 7 F3|7 // 16433 /// ENSM	Cuzd1	NM_008411	chr7	138452068	138465889	-	71.4519	70.3949	90.9348	69.0438	74.9637	107.572	114.139	110.807	83.8611	71.0351	77.1819	1.47814	1.47814	0.00332276	0.033455
6963084	NM_147087 // Olfr585 // olfactory receptor 585 // 7 E3|7 // 259091 /// ENSMUST000001048	Olfr585	NM_147087	chr7	110246257	110247213	+	15.2031	18.19	14.7686	15.6839	15.9089	23.7009	27.8462	25.6901	19.7933	13.6813	16.456	1.61483	1.61483	0.00332414	0.033455
6953591	NM_010449 // Hoxa1 // homeobox A1 // 6 B3|6 26.28 cM // 15394 /// ENSMUST00000000964 //	Hoxa1	NM_010449	chr6	52105224	52108316	-	59.2466	58.8015	68.2208	49.7795	58.6484	79.255	102.237	90.0154	62.6199	63.3271	62.9725	1.53484	1.53484	0.0033244	0.033455
6815255	ENSMUST00000022189 // Aggf1 // angiogenic factor with G patch and FHA domains 1 // 13 D	Aggf1	ENSMUST00000022189	chr13	96120639	96145309	-	716.851	714.614	662.318	690.023	695.598	581.365	503.665	541.122	666.121	725.479	695.169	0.777925	-1.28547	0.00332601	0.033455
6912594	NM_181406 // Rars2 // arginyl-tRNA synthetase 2, mitochondrial // 4 A5|4 // 109093 ///	Rars2	NM_181406	chr4	34562240	34607909	+	1158.63	1101.69	1059.01	1140.54	1114.28	877.673	908.165	892.792	1012.1	1121.26	1065.27	0.801209	-1.24811	0.00333179	0.0334692
6962787	NR_045969 // LOC330599 // uncharacterized LOC330599 // 7 E1|7 // 330599 /// NR_045970 /	LOC330599	NR_045969	chr7	105325714	105334097	+	111.579	120.166	135.921	109.667	118.9	170.134	161.875	165.953	129.074	109.163	118.702	1.39574	1.39574	0.00334758	0.033483
6970117	NM_020290 // Olfr690 // olfactory receptor 690 // 7 E3|7 // 56860 /// ENSMUST0000006192	Olfr690	NM_020290	chr7	112477757	112478775	-	98.7665	98.2115	98.3341	74.6774	91.8686	134.421	157.974	145.723	104.486	132.375	117.607	1.58621	1.58621	0.00334891	0.033483
6755559	NM_026626 // Efcab2 // EF-hand calcium binding domain 2 // 1|1 H3 // 68226 /// ENSMUST0	Efcab2	NM_026626	chr1	180335927	180414624	+	214.023	218.787	206.284	219.266	214.526	178.958	178.114	178.536	228.671	229.626	229.149	0.832235	-1.20158	0.00335068	0.033483
6772217	NM_181470 // Ltv1 // LTV1 homolog (S. cerevisiae) // 10 A2|10 // 353258 /// ENSMUST0000	Ltv1	NM_181470	chr10	12897946	12912953	-	956.241	1007.46	901.198	968.112	957.494	765.984	663.117	712.699	829.133	981.64	902.173	0.744337	-1.34348	0.00335069	0.033483
6847711	NM_010676 // Krtap8-2 // keratin associated protein 8-2 // 16 C3.3|16 // 16704 /// ENSM	Krtap8-2	NM_010676	chr16	88879899	88896667	-	11.8738	12.1733	13.0404	10.8445	11.9571	17.5156	15.9991	16.7401	14.4314	11.6178	12.9484	1.40002	1.40002	0.00336164	0.0335485
6768270	NM_009314 // Tacr2 // tachykinin receptor 2 // 10 B4|10 // 21337 /// ENSMUST00000020278	Tacr2	NM_009314	chr10	61715101	61728738	+	121.62	102.444	134.505	110.442	116.638	158.117	169.489	163.704	126.834	119.576	123.152	1.40352	1.40352	0.00337319	0.0335806
6937405	---	---	---	chr5	35721801	35731423	-	70.4985	66.679	72.2627	69.321	69.6606	85.6951	118.882	100.934	68.7177	65.4858	67.0823	1.44894	1.44894	0.00337364	0.0335806
6900095	NM_177857 // Dennd2c // DENN/MADD domain containing 2C // 3 F2.2|3 // 329727 /// ENSMUS	Dennd2c	NM_177857	chr3	102906585	102973654	+	414.096	406.877	403.174	433.305	414.202	507.242	496.934	502.061	437.716	418.96	428.235	1.21212	1.21212	0.00338224	0.0336224
6882435	NM_028528 // Bpifa3 // BPI fold containing family A, member 3 // 2|2 H2 // 73388 /// EN	Bpifa3	NM_028528	chr2	153956083	153964091	+	75.0354	67.4642	77.8454	62.2698	70.3823	99.8417	97.1411	98.4821	83.2484	70.5209	76.6211	1.39925	1.39925	0.00341292	0.0336481
6831640	NM_028852 // Spatc1 // spermatogenesis and centriole associated 1 // 15|15 // 74281 ///	Spatc1	NM_028852	chr15	76098188	76123039	+	71.2205	75.9001	76.7519	70.9037	73.6462	96.685	87.5303	91.9941	64.9821	67.8633	66.4068	1.24913	1.24913	0.00342204	0.0336481
6885627	NM_001160406 // Gfi1b // growth factor independent 1B // 2 A3|2 // 14582 /// ENSMUST000	Gfi1b	NM_001160406	chr2	28440874	28494009	-	183.56	186.208	219.234	197.315	196.092	253.407	257.407	255.399	204.012	218.636	211.198	1.30244	1.30244	0.00342268	0.0336481
6913506	BC120821 // 4930547C10Rik // RIKEN cDNA 4930547C10 gene // 4 B2|4 // 68274 /// BC120823	4930547C10Rik	BC120821	chr4	52609146	52663571	+	56.4034	58.5294	64.5587	55.8881	58.7473	73.4047	77.9734	75.6548	50.1741	54.8702	52.4696	1.28779	1.28779	0.0034227	0.0336481
6976778	NM_028927 // Tktl2 // transketolase-like 2 // 8|8 B3.3 // 74419 /// ENSMUST00000002025	Tktl2	NM_028927	chr8	69035656	69042234	+	108.805	88.8488	119.497	80.0772	98.0714	163.275	158.035	160.634	112.726	95.0629	103.518	1.63793	1.63793	0.0034237	0.0336481
6759773	NM_194333 // Slc23a3 // solute carrier family 23 (nucleobase transporters), member 3 //	Slc23a3	NM_194333	chr1	75120731	75130464	-	169.038	162.529	184.717	168.284	170.948	206.695	223.642	215.001	171.281	164.92	168.07	1.2577	1.2577	0.00342669	0.0336481
6879959	NM_001003915 // Slc5a12 // solute carrier family 5 (sodium/glucose cotransporter), memb	Slc5a12	NM_001003915	chr2	110435893	110488745	+	55.6905	56.7422	64.5422	56.9423	58.3771	78.5843	71.9563	75.1974	60.949	64.2315	62.5687	1.28813	1.28813	0.00342977	0.0336481
6833171	NM_009699 // Aqp2 // aquaporin 2 // 15 F1|15 57.8 cM // 11827 /// ENSMUST00000023752 //	Aqp2	NM_009699	chr15	99409487	99414980	+	270.636	316.719	332.396	308.221	306.121	389.838	428.357	408.644	312.123	293.796	302.821	1.33491	1.33491	0.00343316	0.0336481
6764034	NM_001029984 // Fcrlb // Fc receptor-like B // 1 H3|1 // 435653 /// ENSMUST00000094337	Fcrlb	NM_001029984	chr1	172836813	172843072	-	154.891	161.657	182.186	149.36	161.563	212.566	210.352	211.457	144.578	151.41	147.955	1.30881	1.30881	0.00343604	0.0336481
6956558	NM_178373 // Cidec // cell death-inducing DFFA-like effector c // 6 E3|6 // 14311 /// E	Cidec	NM_178373	chr6	113374630	113385749	-	176.749	197.823	209.457	187.134	192.407	253.746	239.742	246.645	207.951	211.266	209.602	1.28189	1.28189	0.00343697	0.0336481
6945704	NM_009430 // Prss2 // protease, serine, 2 // 6 B1|6 // 22072 /// ENSMUST00000070380 //	Prss2	NM_009430	chr6	41251527	41475070	+	63.949	45.1383	59.2527	52.6197	54.7721	83.6683	101.743	92.2636	75.3434	56.197	65.07	1.68451	1.68451	0.00343863	0.0336481
6921190	NM_019476 // Olfr159 // olfactory receptor 159 // 4 B1|4 // 29849 /// ENSMUST0000005393	Olfr159	NM_019476	chr4	43782922	43791306	-	26.4356	27.1291	35.1343	21.5711	27.1523	55.7322	51.1648	53.3997	36.4013	22.8755	28.8564	1.96667	1.96667	0.00344174	0.0336481
6970370	ENSMUST00000106739 // Trim66 // tripartite motif-containing 66 // 7 E3|7 51.54 cM // 33	Trim66	ENSMUST00000106739	chr7	116559211	116651798	-	142.569	153.768	171.022	155.46	155.378	200.745	203.813	202.273	149.58	165.559	157.367	1.30181	1.30181	0.00344204	0.0336481
6998231	NM_019815 // Cldn18 // claudin 18 // 9 E3-F1|9 // 56492 /// NM_001194922 // Cldn18 // c	Cldn18	NM_019815	chr9	99591218	99620643	-	126.849	126.35	142.788	135.644	132.735	170.064	164.618	167.319	123.479	132.672	127.993	1.26054	1.26054	0.00345533	0.033687
6950264	NM_207027 // Tas2r125 // taste receptor, type 2, member 125 // 6 G1|6 63.5 cM // 387352	Tas2r125	NM_207027	chr6	132859638	132860604	+	19.0414	23.0896	23.2334	18.639	20.8888	32.0473	27.7764	29.8355	26.4449	26.2313	26.3379	1.42831	1.42831	0.00345571	0.033687
6778609	NM_008341 // Igfbp1 // insulin-like growth factor binding protein 1 // 11 A1|11 1.3 cM	Igfbp1	NM_008341	chr11	7089083	7105838	+	153.473	150.166	192.104	145.738	159.377	214.968	247.789	230.797	164.871	171.085	167.949	1.44811	1.44811	0.00346118	0.033687
6957348	NM_007376 // Pzp // pregnancy zone protein // 6 F1-G3|6 62.0 cM // 11287 /// ENSMUST000	Pzp	NM_007376	chr6	128429858	128476731	-	59.3481	59.463	67.3913	60.4626	61.5796	77.7063	79.0937	78.3972	64.2217	58.2498	61.1631	1.2731	1.2731	0.00346699	0.033687
6945339	NM_197986 // Tmem140 // transmembrane protein 140 // 6 B1|6 // 68487 /// NM_199145 // 3	Tmem140	NM_197986	chr6	34813123	34824946	+	126.424	124.079	125.36	138.014	128.352	165.215	161.613	163.404	141.085	123.778	132.149	1.27309	1.27309	0.00347708	0.033687
6809551	NM_183115 // Ccdc125 // coiled-coil domain containing 125 // 13 D1|13 // 76041 /// ENSM	Ccdc125	NM_183115	chr13	101439456	101467883	+	166.594	167.918	143.59	171.019	161.893	125.602	115.326	120.354	135.185	154.465	144.504	0.743415	-1.34514	0.00347946	0.033687
6868838	ENSMUST00000025755 // Dmrt1 // doublesex and mab-3 related transcription factor 1 // 19	Dmrt1	ENSMUST00000025755	chr19	25580128	25679372	+	136.162	129.77	150.63	142.038	139.44	170.57	199.862	184.636	127.721	137.205	132.378	1.32413	1.32413	0.00347982	0.033687
6750567	NM_009526 // Wnt6 // wingless-related MMTV integration site 6 // 1 C3|1 // 22420 /// EN	Wnt6	NM_009526	chr1	74818493	74831875	+	286.957	296.12	263.27	248.486	273.054	372.925	345.239	358.813	267.019	287.192	276.921	1.31408	1.31408	0.00348567	0.033687
6925081	NM_172700 // Zmpste24 // zinc metallopeptidase, STE24 homolog (S. cerevisiae) // 4 D2.2	Zmpste24	NM_172700	chr4	120731843	120770848	-	1502.34	1445.85	1383.88	1475.31	1451.17	1219.27	1156.7	1187.57	1423.67	1359.35	1391.09	0.818356	-1.22196	0.00348568	0.033687
6861662	NM_021451 // Pmaip1 // phorbol-12-myristate-13-acetate-induced protein 1 // 18 E1|18 //	Pmaip1	NM_021451	chr18	66618228	66625198	+	205.589	255.098	247.992	233.131	234.659	328.352	301.576	314.68	225.134	226.802	225.967	1.34101	1.34101	0.00350097	0.0337343
6871095	NM_028623 // Cst6 // cystatin E/M // 19 A|19 4.0 cM // 73720 /// ENSMUST00000025764 //	Cst6	NM_028623	chr19	5344705	5349599	-	61.1703	74.6076	78.7114	65.0334	69.5221	103.899	93.1323	98.3689	71.8915	77.3785	74.5843	1.41492	1.41492	0.00350373	0.0337343
7012840	NM_133205 // Arr3 // arrestin 3, retinal // X|X C2 // 170735 /// ENSMUST00000113769 //	Arr3	NM_133205	chrX	97799038	97813832	+	46.5423	48.2447	54.4832	48.3857	49.3251	61.2488	64.1848	62.6998	51.1822	49.6303	50.4003	1.27115	1.27115	0.00350381	0.0337343
6756408	NM_023727 // Rd3 // retinal degeneration 3 // 1 H6|1 108.0 cM // 74023 /// NM_001177900	Rd3	NM_023727	chr1	193784705	193812153	+	330.16	361.52	392.487	353.812	358.808	473.205	449.884	461.395	343.332	320.704	331.825	1.28591	1.28591	0.00351605	0.0338009
6879484	NM_009020 // Rag2 // recombination activating gene 2 // 2 E2|2 56.0 cM // 19374 /// ENS	Rag2	NM_009020	chr2	101464885	101472685	+	21.336	25.0996	24.1877	18.8457	22.2277	33.9086	30.2911	32.0488	22.8829	23.3351	23.1078	1.44184	1.44184	0.0035235	0.0338009
6844080	ENSMUST00000023364 // Pla2g10 // phospholipase A2, group X // 16 A1|16 3.4 cM // 26565	Pla2g10	ENSMUST00000023364	chr16	13715155	13779315	-	142.935	136.894	150.234	143.661	143.353	169.608	183.693	176.51	139.766	135.584	137.659	1.23129	1.23129	0.00352399	0.0338009
6783688	NM_018792 // Hils1 // histone H1-like protein in spermatids 1 // 11|11 C // 54388 /// E	Hils1	NM_018792	chr11	94828912	94829770	+	63.9251	56.6133	71.7885	74.8318	66.4022	106.62	89.2302	97.5385	57.3778	61.0712	59.1957	1.4689	1.4689	0.00352987	0.0338149
6843913	NM_009896 // Socs1 // suppressor of cytokine signaling 1 // 16 A1|16 3.4 cM // 12703 //	Socs1	NM_009896	chr16	10782336	10785646	-	1227.24	1114.75	1180.43	1082.31	1149.83	1386.76	1584.82	1482.48	1177.08	1121.64	1149.03	1.28933	1.28933	0.00353576	0.0338289
6923164	NM_172871 // Klhl9 // kelch-like 9 (Drosophila) // 4 C4|4 // 242521 /// ENSMUST00000094	Klhl9	NM_172871	chr4	88364862	88401403	-	1973.17	1905.56	1940.48	1912.44	1932.7	2389.51	2323.04	2355.96	2132.16	1936.05	2031.74	1.21902	1.21902	0.00354492	0.0338597
6818064	ENSMUST00000163336 // Ncoa4 // nuclear receptor coactivator 4 // 14 B|14 // 27057 /// N	Ncoa4	ENSMUST00000163336	chr14	32973119	32993455	+	101.976	68.3652	61.8671	79.426	76.5049	33.128	23.8231	28.0928	45.4573	103.301	68.526	0.367204	-2.72328	0.00354784	0.0338597
7019854	ENSMUST00000042530 // Gucy2f // guanylate cyclase 2f // X F2|X 61.0 cM // 245650 /// NM	Gucy2f	ENSMUST00000042530	chrX	138495389	138632849	-	33.3406	35.9007	36.9407	37.4639	35.8756	44.7049	45.6325	45.1661	38.2822	34.5969	36.393	1.25897	1.25897	0.00357127	0.0339501
6980101	ENSMUST00000011445 // Cd209d // CD209d antigen // 8 A1.1|8 // 170779 /// NM_130904 // C	Cd209d	ENSMUST00000011445	chr8	3871825	3878553	-	54.3053	55.2231	58.014	51.7039	54.7649	65.5825	78.6514	71.8203	57.8727	60.984	59.4082	1.31142	1.31142	0.0035713	0.0339501
6766585	NM_001009574 // Taar5 // trace amine-associated receptor 5 // 10 A4|10 // 215854 /// EN	Taar5	NM_001009574	chr10	23690512	23691525	+	187.315	171.439	191.334	183.792	183.316	227.005	228.302	227.653	127.84	138.652	133.136	1.24186	1.24186	0.00357795	0.0339501
6989422	NM_009992 // Cyp1a1 // cytochrome P450, family 1, subfamily a, polypeptide 1 // 9 B|9 3	Cyp1a1	NM_009992	chr9	57535745	57551631	+	66.9253	66.7937	72.0242	57.0213	65.4577	87.4599	99.3419	93.2118	75.9438	63.565	69.4792	1.424	1.424	0.00359683	0.0339501
6773421	NM_001113385 // BC021785 // cDNA sequence BC021785 // 10 B1|10 // 215928 /// NM_0011133	BC021785	NM_001113385	chr10	39668806	39706451	-	196.667	216.717	256.81	197.356	215.588	294.114	317.405	305.536	215.794	227.566	221.602	1.41724	1.41724	0.00359944	0.0339501
6912520	NM_008076 // Gabrr2 // gamma-aminobutyric acid (GABA) C receptor, subunit rho 2 // 4 A5	Gabrr2	NM_008076	chr4	33149974	33183777	+	101.71	104.413	104.935	90.9051	100.324	123.163	149.863	135.858	98.657	105.306	101.928	1.35419	1.35419	0.00359996	0.0339501
6993472	NM_010242 // Fut4 // fucosyltransferase 4 // 9 A2|9 3.0 cM // 14345 /// ENSMUST00000061	Fut4	NM_010242	chr9	14552764	14556817	-	124.119	123.069	111.477	133.226	122.727	155.136	198.252	175.374	115.723	131.574	123.394	1.42898	1.42898	0.003603	0.0339501
6964794	NM_183193 // Foxi2 // forkhead box I2 // 7 F3|7 // 270004 /// ENSMUST00000060356 // Fox	Foxi2	NM_183193	chr7	142587739	142634438	+	245.208	264.409	283.157	259.354	262.683	332.127	347.541	339.748	254.024	290.874	271.824	1.29337	1.29337	0.00360967	0.0339501
6784494	ENSMUST00000093925 // Crhr1 // corticotropin releasing hormone receptor 1 // 11 E1|11 6	Crhr1	ENSMUST00000093925	chr11	103934164	104075162	+	161.754	168.803	184.498	167.301	170.384	204.573	235.908	219.682	176.105	171.901	173.99	1.28933	1.28933	0.0036099	0.0339501
6814450	NM_175495 // Gpr150 // G protein-coupled receptor 150 // 13 C1|13 // 238725 /// ENSMUST	Gpr150	NM_175495	chr13	76192309	76194492	-	81.6437	91.26	91.0634	79.5671	85.7176	112.458	139.587	125.29	108.39	86.7234	96.9534	1.46166	1.46166	0.00361966	0.0339501
6783828	ENSMUST00000062709 // Hoxb13 // homeobox B13 // 11 D|11 56.0 cM // 15408 /// NM_008267	Hoxb13	ENSMUST00000062709	chr11	96055650	96060303	+	193.992	217.482	242.453	187.129	209.167	290.723	305.752	298.143	236.745	204.253	219.899	1.42538	1.42538	0.00362013	0.0339501
6827845	NM_001001490 // Oxgr1 // oxoglutarate (alpha-ketoglutarate) receptor 1 // 14 E4|14 // 2	Oxgr1	NM_001001490	chr14	120420412	120443889	-	40.0256	40.868	47.2155	38.9978	41.6594	53.5068	76.2777	63.8856	41.0383	40.1514	40.5925	1.53353	1.53353	0.00362417	0.0339501
6880540	NM_146125 // Itpka // inositol 1,4,5-trisphosphate 3-kinase A // 2 E5|2 // 228550 /// E	Itpka	NM_146125	chr2	119568073	119576988	+	195.368	212.59	232.736	210.603	212.413	277.036	279.951	278.49	229.882	200.517	214.699	1.31108	1.31108	0.00362908	0.0339501
6846524	NM_146999 // Olfr181 // olfactory receptor 181 // 16 C2|16 // 259001 /// ENSMUST0000007	Olfr181	NM_146999	chr16	58925442	58928450	-	9.36546	7.95185	8.23524	8.32973	8.45427	11.1206	10.9063	11.0129	8.48433	7.50135	7.97774	1.30265	1.30265	0.00362923	0.0339501
6894187	NM_008093 // Gata5 // GATA binding protein 5 // 2 H4|2 106.0 cM // 14464 /// ENSMUST000	Gata5	NM_008093	chr2	180042129	180122005	-	128.218	139.747	154.629	130.758	137.963	182.842	197.385	189.974	155.402	129.62	141.926	1.37699	1.37699	0.00363063	0.0339501
6871570	NM_133246 // Ms4a3 // membrane-spanning 4-domains, subfamily A, member 3 // 19|19 B //	Ms4a3	NM_133246	chr19	11703936	11715324	-	45.6338	49.5554	50.123	42.0414	46.7223	59.284	65.7519	62.4344	55.6122	50.1974	52.8353	1.33629	1.33629	0.003631	0.0339501
6926440	ENSMUST00000105790 // Clcnka // chloride channel Ka // 4 E1|4 // 12733 /// NM_001146307	Clcnka	ENSMUST00000105790	chr4	140940527	140954688	-	138.236	137.739	143.49	126.455	136.336	166.452	170.118	168.275	130.499	130.461	130.48	1.23427	1.23427	0.00363481	0.0339501
6992275	NM_026338 // 4921517D21Rik // RIKEN cDNA 4921517D21 gene // 9 F1|9 // 67722 /// ENSMUST	4921517D21Rik	NM_026338	chr9	107830811	107834782	+	157.825	146.416	174.777	139.511	154.069	196.362	242.764	218.334	144.227	143.155	143.69	1.41712	1.41712	0.00364158	0.0339501
6946140	U42384 // Dfna5 // deafness, autosomal dominant 5 (human) // 6 B2.3|6 // 54722 /// U423	Dfna5	U42384	chr6	50150171	50153118	+	376.84	420.744	376.585	413.668	396.435	308.969	324.157	316.473	380.668	366.759	373.649	0.798294	-1.25267	0.00364814	0.0339501
6921916	NM_018761 // Ctnnal1 // catenin (cadherin associated protein), alpha-like 1 // 4|4 C1 /	Ctnnal1	NM_018761	chr4	56823807	56878076	-	623.022	671.429	578.29	648.935	629.451	512.295	445.827	477.905	618.183	677.858	647.336	0.759242	-1.3171	0.00365181	0.0339501
6909792	NM_011932 // Dapp1 // dual adaptor for phosphotyrosine and 3-phosphoinositides 1 // 3 H	Dapp1	NM_011932	chr3	137593981	137662126	-	1553.39	1592.75	1517.42	1594.84	1564.3	1146.4	1333.41	1236.37	1497.98	1592.3	1544.47	0.790384	-1.26521	0.00365357	0.0339501
6748695	NM_009918 // Cnga3 // cyclic nucleotide gated channel alpha 3 // 1 B|1 // 12790 /// ENS	Cnga3	NM_009918	chr1	37275192	37321882	+	86.4701	93.8842	101.495	76.0644	88.9757	121.192	128.685	124.883	84.6818	82.0044	83.3321	1.40355	1.40355	0.00366008	0.0339501
6860178	NM_053134 // Pcdhb9 // protocadherin beta 9 // 18 B3|18 // 93880 /// ENSMUST00000057228	Pcdhb9	NM_053134	chr18	37560509	37563917	+	140.158	156.075	137.76	158.114	147.744	119.527	111.324	115.353	130.769	134.799	132.769	0.780757	-1.28081	0.0036679	0.0339501
6879998	NM_146400 // Olfr1288 // olfactory receptor 1288 // 2 E5|2 // 258395 /// ENSMUST0000010	Olfr1288	NM_146400	chr2	111296743	111319881	+	58.388	51.1017	71.2338	52.3708	57.7608	130.238	132.642	131.434	94.2029	43.9963	64.3786	2.27549	2.27549	0.00367239	0.0339501
6792999	NM_025323 // 0610009D07Rik // RIKEN cDNA 0610009D07 gene // 12 A1.1|12 // 66055 /// ENS	0610009D07Rik	NM_025323	chr12	4824361	4834464	+	847.095	824.771	823.24	861.239	838.938	715.065	632.933	672.747	850.555	912.854	881.154	0.801905	-1.24703	0.00367624	0.0339501
6775471	NM_010102 // S1pr4 // sphingosine-1-phosphate receptor 4 // 10 C1|10 // 13611 /// NM_01	S1pr4	NM_010102	chr10	80960503	80962872	-	214.443	169.026	185.403	177.44	185.827	295.386	248.756	271.072	206.579	171.8	188.389	1.45873	1.45873	0.00368245	0.0339501
6851107	NM_001037718 // 4932415M13Rik // RIKEN cDNA 4932415M13 gene // 17 C|17 // 211496 /// NR	4932415M13Rik	NM_001037718	chr17	53828708	53899668	+	62.6212	68.8512	87.2934	62.1456	69.5433	100.216	111.939	105.916	65.8938	63.0918	64.4778	1.52301	1.52301	0.00368424	0.0339501
6762125	NM_021380 // Il20 // interleukin 20 // 1 E4|1 // 58181 /// ENSMUST00000027673 // Il20 /	Il20	NM_021380	chr1	132803344	132808275	-	62.7585	68.6439	66.9787	56.6133	63.5747	80.5164	102.124	90.6792	62.8413	57.5147	60.119	1.42634	1.42634	0.0037016	0.0339501
6898772	NM_010196 // Fga // fibrinogen alpha chain // 3 F1|3 44.8 cM // 14161 /// NM_001111048	Fga	NM_010196	chr3	82823769	82837549	+	84.3286	73.4316	69.3541	65.3815	72.7941	94.6218	108.784	101.456	67.8327	69.6248	68.7229	1.39374	1.39374	0.00371382	0.0339501
6792839	ENSMUST00000026162 // Sectm1a // secreted and transmembrane 1A // 11 E2|11 // 209588 //	Sectm1a	ENSMUST00000026162	chr11	120926360	120954294	-	75.7918	86.4312	89.7096	82.2686	83.3858	127.055	102.99	114.391	88.9788	83.5629	86.2283	1.37184	1.37184	0.00371444	0.0339501
6942395	NM_029681 // Wbscr28 // Williams-Beuren syndrome chromosome region 28 (human) // 5 G2|5	Wbscr28	NM_029681	chr5	135377481	135382603	-	224.153	241.054	275.197	231.757	242.288	306.281	342.65	323.955	240.64	250.178	245.362	1.33706	1.33706	0.00372194	0.0339501
6868240	NM_146990 // Olfr1494 // olfactory receptor 1494 // 19 C1|19 // 258992 /// ENSMUST00000	Olfr1494	NM_146990	chr19	13814587	13824545	+	42.4058	50.501	54.6303	59.8297	51.4361	77.4885	73.4673	75.4511	66.7197	69.0189	67.8596	1.46689	1.46689	0.00372456	0.0339501
6838331	NM_001168693 // Endou // endonuclease, polyU-specific // 15 F1|15 56.8 cM // 19011 ///	Endou	NM_001168693	chr15	97541450	97573251	-	126.579	115.319	143.974	115.059	124.7	163.165	182.914	172.758	136.249	125.273	130.645	1.38539	1.38539	0.00372535	0.0339501
6771757	NM_146927 // Olfr799 // olfactory receptor 799 // 10 D3|10 // 258929 /// ENSMUST0000007	Olfr799	NM_146927	chr10	129084186	129085117	+	30.1196	28.43	32.9562	27.1579	29.588	39.1894	39.4953	39.342	25.4133	28.9871	27.1413	1.32966	1.32966	0.00372585	0.0339501
6906634	NM_001195496 // Dclk2 // doublecortin-like kinase 2 // 3 F1|3 // 70762 /// NM_001195498	Dclk2	NM_001195496	chr3	86589583	86724786	-	488.089	463.858	460.731	493.977	476.44	398.399	390.111	394.234	498.818	484.963	491.842	0.827453	-1.20853	0.00372802	0.0339501
6986725	NM_010809 // Mmp3 // matrix metallopeptidase 3 // 9 A1|9 1.0 cM // 17392 /// ENSMUST000	Mmp3	NM_010809	chr9	7445822	7455975	+	41.2991	44.4453	43.6104	46.8167	43.9987	53.2629	63.7251	58.2598	47.0832	42.9873	44.9887	1.32412	1.32412	0.00372929	0.0339501
6849947	ENSMUST00000174088 // Actl9 // actin-like 9 // 17 B1|17 // 69481 /// NM_183282 // Actl9	Actl9	ENSMUST00000174088	chr17	33569801	33571210	+	60.3265	63.1854	77.5008	66.9555	66.6891	88.0481	97.9572	92.8706	66.8924	73.3238	70.0343	1.39259	1.39259	0.00373128	0.0339501
6783054	NM_009330 // Hnf1b // HNF1 homeobox B // 11 C|11 44.0 cM // 21410 /// ENSMUST0000002101	Hnf1b	NM_009330	chr11	83663585	83745063	+	94.42	107.316	120.047	100.837	105.239	135.487	157.162	145.923	126.141	119.248	122.645	1.38659	1.38659	0.00373547	0.0339501
6989258	NM_172923 // AI118078 // expressed sequence AI118078 // 9 B|9 // 244886 /// ENSMUST0000	AI118078	NM_172923	chr9	55174730	55286133	+	146.507	134.549	149.542	136.347	141.591	182.259	173.622	177.889	149.268	136.438	142.709	1.25635	1.25635	0.0037357	0.0339501
6818858	NM_144535 // Mudeng // MU-2/AP1M2 domain containing, death-inducing // 14 C1|14 // 7438	Mudeng	NM_144535	chr14	49685772	49710534	+	525.971	558.038	455.788	538.193	518.004	398.548	324.922	359.857	484.533	572.448	526.661	0.694701	-1.43947	0.00374308	0.0339501
6824679	ENSMUST00000111542 // Olfr1508 // olfactory receptor 1508 // 14 C2|14 // 57270 /// NM_0	Olfr1508	ENSMUST00000111542	chr14	53078726	53087150	-	316.715	249.67	260.127	232.038	262.842	368.674	383.236	375.886	226.013	240.514	233.151	1.43008	1.43008	0.00374358	0.0339501
6970093	NM_207146 // Olfr670 // olfactory receptor 670 // 7 E3|7 // 384703 /// ENSMUST000000504	Olfr670	NM_207146	chr7	112108306	112109244	-	66.112	54.9535	78.5528	53.5565	62.5262	112.367	91.9393	101.641	65.0267	64.1123	64.5681	1.62557	1.62557	0.00374648	0.0339501
6862247	NM_025409 // Ier3ip1 // immediate early response 3 interacting protein 1 // 18 E3|18 //	Ier3ip1	NM_025409	chr18	77168703	77190035	+	514.976	570.669	500.536	567.206	537.447	686.669	670.303	678.437	581.728	556.536	568.994	1.26233	1.26233	0.00375083	0.0339501
6897908	NM_008772 // P2ry1 // purinergic receptor P2Y, G-protein coupled 1 // 3 D|3 // 18441 //	P2ry1	NM_008772	chr3	60806125	60943320	+	625.732	625.931	661.189	618.762	632.692	787.546	849.417	817.9	685	573.973	627.034	1.29273	1.29273	0.00375272	0.0339501
6806770	BC064117 // Gm1574 // predicted gene 1574 // 13 A5|13 // 380842 /// BC064117 // Gm1574	Gm1574	BC064117	chr13	46352721	46395484	+	88.006	86.0969	92.9756	86.7872	88.4261	104.146	119.547	111.581	86.3659	91.2182	88.7589	1.26186	1.26186	0.00376533	0.0339855
6789319	NM_011367 // Shbg // sex hormone binding globulin // 11 B3|11 35.0 cM // 20415 /// ENSM	Shbg	NM_011367	chr11	69428314	69431407	-	116.833	117.606	122.504	101.023	114.194	142.559	167.46	154.508	120.269	126.262	123.229	1.35304	1.35304	0.00376889	0.0339855
6796728	NM_001159500 // Esrrb // estrogen related receptor, beta // 12 D2|12 41.0 cM // 26380 /	Esrrb	NM_001159500	chr12	87702067	87889186	+	100.836	109.512	114.504	97.0314	105.245	130.393	141.055	135.619	106.096	104.478	105.284	1.2886	1.2886	0.00377331	0.0339855
6772736	NM_010167 // Eya4 // eyes absent 4 homolog (Drosophila) // 10 A3|10 18.0 cM // 14051 //	Eya4	NM_010167	chr10	22780627	23233288	-	2220.7	2372.51	2153.55	2277.29	2254.67	1909.26	1602.16	1748.98	2387.19	2367.26	2377.12	0.775742	-1.28909	0.00377442	0.0339855
6958734	NM_134203 // Vmn1r73 // vomeronasal 1 receptor 73 // 7 A1|7 // 171237 /// ENSMUST000000	Vmn1r73	NM_134203	chr7	12302361	12394317	+	13.8707	11.7236	13.9066	12.6911	13.0158	17.723	21.7931	19.6529	18.2055	13.812	15.8572	1.50994	1.50994	0.00379125	0.0340065
6869223	BC150968 // Pten // phosphatase and tensin homolog // 19 C1|19 24.5 cM // 19211 /// BC1	Pten	BC150968	chr19	32880564	32883572	+	334.156	340.948	318.884	419.524	351.363	265.863	219.122	241.363	352.837	364.203	358.475	0.686933	-1.45575	0.00380204	0.0340065
6838695	NM_212487 // Krt78 // keratin 78 // 15 F3|15 // 332131 /// NM_212487 // Krt78 // kerati	Krt78	NM_212487	chr15	101774564	101798955	-	108.434	114.183	130.903	119.615	117.998	150.111	152.898	151.499	115.39	116.642	116.014	1.2839	1.2839	0.00380378	0.0340065
6978871	NM_175024 // Nrn1l // neuritin 1-like // 8 D3|8 // 234700 /// ENSMUST00000060167 // Nrn	Nrn1l	NM_175024	chr8	108417434	108418919	+	231.362	215.912	239.284	226.27	228.049	277.322	277.73	277.526	229.794	236.661	233.203	1.21696	1.21696	0.00380587	0.0340065
6754537	ENSMUST00000086084 // Tnfsf18 // tumor necrosis factor (ligand) superfamily, member 18	Tnfsf18	ENSMUST00000086084	chr1	163373523	163524094	+	64.4635	58.4824	64.9038	64.9591	63.1412	90.9959	83.985	87.4199	79.6107	61.6428	70.0528	1.38452	1.38452	0.00381086	0.0340065
6965586	NM_175250 // 2810007J24Rik // RIKEN cDNA 2810007J24 gene // 7 A1|7 // 76971 /// NM_0011	2810007J24Rik	NM_175250	chr7	14996058	15032098	-	20.0987	19.7804	17.5306	18.5084	18.9514	23.1818	24.7266	23.9416	16.9717	16.1939	16.5783	1.26332	1.26332	0.00382994	0.0340065
6779972	NM_001025382 // Fam196b // family with sequence similarity 196, member B // 11 A4|11 //	Fam196b	NM_001025382	chr11	34214485	34347635	+	183.553	216.458	209.456	200.271	202.05	246.911	287.614	266.487	202.526	208.961	205.719	1.31891	1.31891	0.00383034	0.0340065
6885432	NM_007995 // Fcna // ficolin A // 2 A3|2 // 14133 /// ENSMUST00000028307 // Fcna // fic	Fcna	NM_007995	chr2	25480087	25487973	-	167.869	174.375	208.325	173.649	180.392	231.857	250.284	240.895	181.635	180.893	181.264	1.33539	1.33539	0.00383371	0.0340065
6819228	NM_027790 // Dhrs2 // dehydrogenase/reductase member 2 // 14 C1|14 // 71412 /// ENSMUST	Dhrs2	NM_027790	chr14	55782985	55860264	+	95.665	104.653	104.841	98.6905	100.885	124.315	121.639	122.97	101.951	100.898	101.423	1.21891	1.21891	0.00383381	0.0340065
7011987	NM_008106 // Opn1mw // opsin 1 (cone pigments), medium-wave-sensitive (color blindness,	Opn1mw	NM_008106	chrX	71331587	71396095	+	67.0711	71.8283	74.0522	68.2506	70.2453	95.2614	83.8164	89.3558	58.8308	63.1552	60.9549	1.27205	1.27205	0.00383559	0.0340065
6889357	NM_178695 // Prrg4 // proline rich Gla (G-carboxyglutamic acid) 4 (transmembrane) // 2	Prrg4	NM_178695	chr2	104670558	104701095	-	497.168	582.563	492.016	525.213	523.048	289.436	410.091	344.521	488.228	532.785	510.02	0.658682	-1.51818	0.00383582	0.0340065
6819750	NM_146246 // Rp1l1 // retinitis pigmentosa 1 homolog (human)-like 1 // 14 D1|14 // 2712	Rp1l1	NM_146246	chr14	64611288	64654498	+	126.108	120.696	143.772	102.894	122.497	172.496	207.483	189.182	136.513	113.817	124.649	1.54439	1.54439	0.00383883	0.0340065
6888374	NM_146865 // Olfr992 // olfactory receptor 992 // 2 E1|2 // 258865 /// ENSMUST000000999	Olfr992	NM_146865	chr2	85239759	85249578	-	19.7183	16.016	19.0866	16.2383	17.6878	24.1396	25.2286	24.6781	18.3042	21.2413	19.7181	1.39521	1.39521	0.00384035	0.0340065
6785224	ENSMUST00000063446 // Sphk1 // sphingosine kinase 1 // 11 E2|11 // 20698 /// ENSMUST000	Sphk1	ENSMUST00000063446	chr11	116386879	116397984	+	284.562	283.806	279.85	270.512	279.627	327.091	343.708	335.298	259.086	255.654	257.365	1.19909	1.19909	0.00384511	0.0340065
7009771	NM_001199347 // Foxp3 // forkhead box P3 // X A1.1|X 2.1 cM // 20371 /// NM_054039 // F	Foxp3	NM_001199347	chrX	7150726	7172398	+	124.824	129.377	149.247	127.455	132.39	166.93	175.438	171.131	141.884	137.706	139.78	1.29263	1.29263	0.00384512	0.0340065
6997667	AF529169 // AF529169 // cDNA sequence AF529169 // 9 E3.1|9 // 209743 /// BC113792 // AF	AF529169	AF529169	chr9	89482064	89517953	-	178.306	183.88	188.857	164.906	178.759	217.922	228.652	223.223	162.199	168.391	165.265	1.24874	1.24874	0.00385291	0.0340065
6749115	ENSMUST00000074525 // Gulp1 // GULP, engulfment adaptor PTB domain containing 1 // 1|1	Gulp1	ENSMUST00000074525	chr1	44608366	44896390	+	987.037	1053.3	970.699	1134.7	1034.49	835.045	763.694	798.573	989.352	1069.26	1028.55	0.771972	-1.29538	0.00385471	0.0340065
6860172	NM_053132 // Pcdhb7 // protocadherin beta 7 // 18 B3|18 // 93878 /// ENSMUST00000053037	Pcdhb7	NM_053132	chr18	37500639	37504856	+	366.487	371.307	376.112	347.886	365.288	289.516	278.917	284.166	323.188	385.904	353.158	0.777923	-1.28547	0.0038572	0.0340065
6885437	NM_001001714 // Sohlh1 // spermatogenesis and oogenesis specific basic helix-loop-helix	Sohlh1	NM_001001714	chr2	25698523	25702768	-	155.71	180.133	189.848	172.171	174.008	238.354	220.258	229.126	170.431	158.293	164.25	1.31676	1.31676	0.00386127	0.0340065
6795025	NM_029825 // Scfd1 // Sec1 family domain containing 1 // 12|12 C1 // 76983 /// ENSMUST0	Scfd1	NM_029825	chr12	52478520	52576960	+	875.249	863.349	791.843	909.04	858.789	709.279	654.02	681.089	868.908	913.063	890.709	0.793084	-1.2609	0.00387331	0.0340448
6837018	NM_027902 // Tmprss6 // transmembrane serine protease 6 // 15|15 E2 // 71753 /// ENSMUS	Tmprss6	NM_027902	chr15	78270103	78305785	-	171.71	190.63	212.241	182.978	188.823	244.366	248.431	246.39	190.959	185.206	188.06	1.30488	1.30488	0.0038758	0.0340448
6879995	ENSMUST00000062407 // Olfr1284 // olfactory receptor 1284 // 2 E3|2 // 258379 /// NM_14	Olfr1284	ENSMUST00000062407	chr2	111215779	111220094	+	40.8114	35.2324	45.0879	39.063	39.8921	65.3393	87.0782	75.4297	34.755	59.1288	45.3324	1.89084	1.89084	0.00388512	0.0340448
6751536	NM_016894 // Ramp1 // receptor (calcitonin) activity modifying protein 1 // 1 D|1 56.0	Ramp1	NM_016894	chr1	93120257	93121772	+	77.3398	62.2555	87.5394	72.7119	74.4041	124.108	139.632	131.641	84.0858	53.5977	67.1325	1.76927	1.76927	0.00389292	0.0340448
6944397	NM_021050 // Cftr // cystic fibrosis transmembrane conductance regulator // 6 A3|6 3.1	Cftr	NM_021050	chr6	18120697	18283337	+	92.0886	99.5825	80.8799	92.67	91.0527	61.748	73.0484	67.1609	96.6944	98.6871	97.6853	0.737606	-1.35574	0.00390032	0.0340448
6803871	NM_027360 // 2010107E04Rik // RIKEN cDNA 2010107E04 gene // 12 F1|12 // 70257 /// ENSMU	2010107E04Rik	NM_027360	chr12	113184981	113205211	-	679.528	578.743	697.433	659.734	652.218	510.593	433.477	470.457	735.688	852.272	791.837	0.721322	-1.38634	0.00390308	0.0340448
6791069	NM_008081 // B4galnt2 // beta-1,4-N-acetyl-galactosaminyl transferase 2 // 11 D|11 55.7	B4galnt2	NM_008081	chr11	95726009	95817738	-	57.9497	63.6602	64.1288	60.1883	61.4287	72.8168	82.1165	77.327	56.0173	57.209	56.6098	1.25881	1.25881	0.00390434	0.0340448
6986211	NM_172762 // Rbm34 // RNA binding motif protein 34 // 8 E2|8 67.0 cM // 52202 /// ENSMU	Rbm34	NM_172762	chr8	129471075	129494999	-	810.776	814.562	762.799	808.649	798.91	655.331	593.885	623.852	708.709	823.868	764.122	0.780877	-1.28061	0.00391452	0.0340448
7011581	---	---	---					230.898	242.164	228.411	234.111	233.839	193.66	174.272	183.71	231.313	200.975	215.611	0.785628	-1.27287	0.00391509	0.0340448
6825192	NM_013869 // Tnfrsf19 // tumor necrosis factor receptor superfamily, member 19 // 14 D1	Tnfrsf19	NM_013869	chr14	61582686	61711482	-	1860.4	1746.56	1676.11	1947.22	1804.65	2549.86	2339.53	2442.43	2184.97	1794.54	1980.16	1.35346	1.35346	0.00391538	0.0340448
7011413	NM_011616 // Cd40lg // CD40 ligand // X A5|X 18.0 cM // 21947 /// ENSMUST00000033466 //	Cd40lg	NM_011616	chrX	54465270	54477710	+	70.4755	69.1995	86.7385	58.008	70.3818	106.572	111.092	108.809	70.5801	61.361	65.8093	1.54597	1.54597	0.00391556	0.0340448
6762370	ENSMUST00000172898 // 4931440L10Rik // RIKEN cDNA 4931440L10 gene // 1 E4|1 // 71001 //	4931440L10Rik	ENSMUST00000172898	chr1	136437533	136449760	-	66.7469	63.5659	71.0011	69.9242	67.7463	80.95	87.1175	83.9774	67.5606	65.7596	66.654	1.23958	1.23958	0.00391965	0.0340448
6967584	ENSMUST00000068911 // Gabrg3 // gamma-aminobutyric acid (GABA) A receptor, subunit gamm	Gabrg3	ENSMUST00000068911	chr7	63979142	64645306	-	206.708	234.204	222.778	199.285	215.314	269.672	275.913	272.775	225.324	225.596	225.46	1.26686	1.26686	0.00392904	0.0340448
6781526	NM_178618 // Fam83g // family with sequence similarity 83, member G // 11 B2|11 // 6964	Fam83g	NM_178618	chr11	61497298	61523450	+	143.255	172.609	144.258	165.366	155.844	204.078	206.649	205.36	162.138	167.658	164.875	1.31773	1.31773	0.00394347	0.0340448
6983826	NM_194059 // Nanos3 // nanos homolog 3 (Drosophila) // 8 C3|8 // 244551 /// ENSMUST0000	Nanos3	NM_194059	chr8	86685205	86700463	-	468.56	442.244	456.411	419.635	446.337	536.673	617.926	575.866	484.657	440.29	461.939	1.29021	1.29021	0.00394558	0.0340448
6965592	NM_007770 // Crx // cone-rod homeobox containing gene // 7 A2|7 8.5 cM // 12951 /// ENS	Crx	NM_007770	chr7	16451300	16492473	-	113.431	112.43	125.421	101.186	112.791	150.002	143.785	146.86	98.3655	98.7077	98.5368	1.30206	1.30206	0.0039475	0.0340448
6819276	NM_008519 // Ltb4r1 // leukotriene B4 receptor 1 // 14 C3|14 20.5 cM // 16995 /// ENSMU	Ltb4r1	NM_008519	chr14	56383328	56387326	+	254.344	268.366	341.374	257.84	278.409	377.638	460.022	416.8	304.272	294.348	299.269	1.49708	1.49708	0.00394953	0.0340448
6935479	NM_001081362 // Trrap // transformation/transcription domain-associated protein // 5 G2	Trrap	NM_001081362	chr5	145619048	145620645	+	375.461	388.131	330.084	409.262	374.577	296.558	259.036	277.163	394.844	418.789	406.64	0.739933	-1.35147	0.00394954	0.0340448
6828417	NM_026069 // Rpl37 // ribosomal protein L37 // 15 A1|15 // 67281 /// BC081438 // Rpl37	Rpl37	NM_026069	chr15	5061919	5070024	+	371.189	451.396	314.009	402.571	381.49	226.559	267.712	246.277	395.759	344.655	369.326	0.645565	-1.54903	0.00395024	0.0340448
6778476	NM_023816 // Ankrd36 // ankyrin repeat domain 36 // 11 A1|11 // 76389 /// ENSMUST000001	Ankrd36	NM_023816	chr11	5469688	5520192	+	91.8069	86.6669	100.079	79.4387	89.182	116.476	122.539	119.47	91.0893	83.803	87.3702	1.33962	1.33962	0.00396872	0.0341656
6856710	NM_001114098 // 1110012J17Rik // RIKEN cDNA 1110012J17 gene // 17 E1.1|17 // 68617 ///	1110012J17Rik	NM_001114098	chr17	66601620	66802193	-	455.968	485.316	531.03	464.45	483.342	620.751	598.501	609.524	494.282	478.216	486.181	1.26106	1.26106	0.00398001	0.0341891
6800427	NM_013760 // Dnajb9 // DnaJ (Hsp40) homolog, subfamily B, member 9 // 12 B1|12 // 27362	Dnajb9	NM_013760	chr12	45268879	45311403	-	5394.6	5330.67	5178.07	5167.68	5266.76	4350.6	4470.13	4409.81	5080.66	5263.84	5171.26	0.837305	-1.19431	0.0039804	0.0341891
6963260	NM_001002894 // Nlrp14 // NLR family, pyrin domain containing 14 // 7 E3|7 // 76858 ///	Nlrp14	NM_001002894	chr7	114310514	114343132	+	43.2468	42.9016	44.0515	36.1948	41.4724	54.9162	53.9919	54.4523	42.0205	39.7549	40.872	1.31297	1.31297	0.00399849	0.0342684
6807758	NM_146819 // Olfr466 // olfactory receptor 466 // 13 C1|13 // 258816 /// ENSMUST0000005	Olfr466	NM_146819	chr13	65253534	65254460	+	47.9846	50.1786	42.5973	45.1618	46.3919	64.9411	83.8634	73.798	63.6955	45.1055	53.6007	1.59075	1.59075	0.00399964	0.0342684
6844444	NM_183158 // Cyp2ab1 // cytochrome P450, family 2, subfamily ab, polypeptide 1 // 16 A3	Cyp2ab1	NM_183158	chr16	20308460	20325467	-	71.0903	67.9641	82.796	68.1013	72.2462	91.7388	101.593	96.5403	68.7234	72.1066	70.3945	1.33627	1.33627	0.00400308	0.0342684
6782921	NM_023438 // Tmem132e // transmembrane protein 132E // 11 C|11 // 270893 /// ENSMUST000	Tmem132e	NM_023438	chr11	82140504	82267621	+	214.776	220.58	257.886	210.024	225.067	298.882	292.974	295.913	223.985	234.927	229.392	1.31478	1.31478	0.00401562	0.0343103
6942876	NM_029048 // Spdyb // speedy homolog B (Xenopus laevis) // 5 G2|5 // 74673 /// ENSMUST0	Spdyb	NM_029048	chr5	143978005	143995012	-	113.631	114.783	143.23	115.974	121.323	171.074	165.698	168.364	146.367	128.586	137.189	1.38774	1.38774	0.00401695	0.0343103
6785631	NM_153142 // Slc35e4 // solute carrier family 35, member E4 // 11 A1|11 // 103710 /// E	Slc35e4	NM_153142	chr11	3807027	3814677	-	498.828	466.324	526.03	463.845	488.096	586.018	659.414	621.633	480.722	489.58	485.131	1.27359	1.27359	0.00402491	0.0343381
6988235	NM_146882 // Olfr874 // olfactory receptor 874 // 9 A5|9 // 258882 /// ENSMUST000001150	Olfr874	NM_146882	chr9	37553721	37554633	+	51.8305	32.6452	38.3759	32.9855	38.2556	68.8402	69.8656	69.3508	33.8619	46.1273	39.5216	1.81283	1.81283	0.00403093	0.0343381
6948913	NM_011498 // Bhlhe40 // basic helix-loop-helix family, member e40 // 6|6 E-F1 // 20893	Bhlhe40	NM_011498	chr6	108561466	108616919	+	539.721	567.71	506.23	522.856	533.65	385.95	439.12	411.677	572.694	647.371	608.891	0.771437	-1.29628	0.00403603	0.0343381
6842503	NM_013918 // Usp25 // ubiquitin specific peptidase 25 // 16 C3.1|16 // 30940 /// ENSMUS	Usp25	NM_013918	chr16	76946508	77129711	+	1827.43	1877.89	1700.8	1882.06	1820.6	1526.28	1416.09	1470.1	1728.13	1810.16	1768.73	0.807537	-1.23833	0.0040398	0.0343381
6926655	ENSMUST00000030339 // Tnfrsf8 // tumor necrosis factor receptor superfamily, member 8 /	Tnfrsf8	ENSMUST00000030339	chr4	144857050	144905057	-	207.125	218.752	244.936	228.714	224.456	287.865	280.886	284.353	234.735	224.035	229.322	1.26686	1.26686	0.00404374	0.0343381
6881499	NM_001038641 // 2210009G21Rik // RIKEN cDNA 2210009G21 gene // 2|2 G1 // 74243 /// BC06	2210009G21Rik	NM_001038641	chr2	136700086	136897673	+	883.9	871.605	880.494	904.364	885.01	763.9	715.873	739.497	864.415	874.146	869.27	0.83558	-1.19677	0.00404715	0.0343381
6775201	NM_001109991 // Col18a1 // collagen, type XVIII, alpha 1 // 10 B5-C1|10 41.3 cM // 1282	Col18a1	NM_001109991	chr10	76514926	76692619	-	760.455	809.754	786.913	758.639	778.66	940.634	977.058	958.67	877.083	788.862	831.804	1.23118	1.23118	0.00405383	0.0343566
6933259	NM_144911 // Rpap2 // RNA polymerase II associated protein 2 // 5 E5|5 // 231571 /// EN	Rpap2	NM_144911	chr5	108026402	108145660	+	423.181	497.206	442.852	463.183	455.795	353.087	321.158	336.744	386.753	468.531	425.681	0.738808	-1.35353	0.00406066	0.0343764
6931375	NM_028975 // Tmem33 // transmembrane protein 33 // 5|5 D // 67878 /// ENSMUST0000003791	Tmem33	NM_028975	chr5	67651824	67698193	+	908.272	917.389	831.164	888.255	885.618	667.216	720.682	693.437	841.798	969.032	903.174	0.782991	-1.27715	0.00406605	0.03438
6758993	NM_001164682 // Mpp4 // membrane protein, palmitoylated 4 (MAGUK p55 subfamily member 4	Mpp4	NM_001164682	chr1	59177791	59218762	-	88.374	88.7835	89.5766	82.4684	87.254	107.305	119.993	113.472	93.9792	79.7355	86.5649	1.30048	1.30048	0.00407008	0.03438
6877905	ENSMUST00000005364 // G6pc2 // glucose-6-phosphatase, catalytic, 2 // 2 C2|2 42.0 cM //	G6pc2	ENSMUST00000005364	chr2	69049082	69066095	+	50.502	53.1114	63.9308	48.9521	53.8263	76.8125	93.4084	84.7047	61.1996	45.9875	53.0511	1.57367	1.57367	0.00408488	0.0344498
6772231	NM_019961 // Pex3 // peroxisomal biogenesis factor 3 // 10|10 A // 56535 /// ENSMUST000	Pex3	NM_019961	chr10	13227507	13272925	-	1674.48	1637.86	1626.89	1788.21	1680.65	1343.7	1246.44	1294.16	1564.41	1863.89	1707.65	0.770024	-1.29866	0.00409201	0.0344498
6973206	NM_008350 // Il11 // interleukin 11 // 7 A1|7 2.0 cM // 16156 /// ENSMUST00000094892 //	Il11	NM_008350	chr7	4724667	4728272	-	174.022	162.479	163.439	143.61	160.505	249.471	198.845	222.724	153.274	146.102	149.645	1.38766	1.38766	0.0040933	0.0344498
6843917	ENSMUST00000023144 // Prm1 // protamine 1 // 16 cen-C3|16 3.4 cM // 19118 /// NM_013637	Prm1	ENSMUST00000023144	chr16	10796440	10805912	-	176.021	165.059	163.882	178.117	170.652	215.54	202.216	208.771	168.96	165.292	167.115	1.22338	1.22338	0.00409636	0.0344498
6857963	NM_008838 // Pigf // phosphatidylinositol glycan anchor biosynthesis, class F // 17 E4-	Pigf	NM_008838	chr17	87396599	87424741	-	756.706	748.065	677.243	742.136	730.338	607.049	545.377	575.387	690.128	752.147	720.468	0.787838	-1.2693	0.00411568	0.0344666
6913193	ENSMUST00000107783 // 1300002K09Rik // RIKEN cDNA 1300002K09 gene // 4 B1|4 // 74152 //	1300002K09Rik	ENSMUST00000107783	chr4	45861554	45963818	+	127.713	136.26	149.689	123.981	134.056	170.249	186.003	177.951	140.09	125.633	132.665	1.32744	1.32744	0.00411695	0.0344666
6789743	NM_008878 // Serpinf2 // serine (or cysteine) peptidase inhibitor, clade F, member 2 //	Serpinf2	NM_008878	chr11	75245238	75253147	-	123.207	134.625	150.601	123.345	132.488	171.084	181.071	176.007	118.633	127.035	122.762	1.32847	1.32847	0.00412341	0.0344666
6999677	ENSMUST00000026274 // Lztfl1 // leucine zipper transcription factor-like 1 // 9 F|9 71.	Lztfl1	ENSMUST00000026274	chr9	123591518	123673089	-	791.102	755.03	814.584	944.646	823.383	652.014	547.616	597.539	778.299	804.172	791.129	0.725715	-1.37795	0.00413468	0.0344666
6934053	ENSMUST00000042163 // Naa25 // N(alpha)-acetyltransferase 25, NatB auxiliary subunit //	Naa25	ENSMUST00000042163	chr5	121847965	121894367	+	1124.52	1175.21	1078.12	1096.51	1118	906.083	937.828	921.819	1041.61	1091.81	1066.38	0.824528	-1.21282	0.00413512	0.0344666
6947445	NM_011912 // Vax2 // ventral anterior homeobox containing gene 2 // 6 C3|6 35.5 cM // 2	Vax2	NM_011912	chr6	83661258	83688298	+	162.276	186.128	228.825	178.47	187.407	266.261	279.722	272.908	203.457	191.329	197.299	1.45624	1.45624	0.0041354	0.0344666
6935094	NM_001005426 // Zcwpw1 // zinc finger, CW type with PWWP domain 1 // 5 G2|5 // 381678 /	Zcwpw1	NM_001005426	chr5	138228676	138263839	+	387.927	388.944	352.175	403.295	382.607	303.092	289.781	296.363	368.053	427.023	396.443	0.774582	-1.29102	0.00414	0.0344666
6964382	NM_021334 // Itgax // integrin alpha X // 7 F3|7 // 16411 /// ENSMUST00000033053 // Itg	Itgax	NM_021334	chr7	135273073	135298223	+	82.8776	86.0015	94.6874	84.3146	86.8528	105.104	115.463	110.162	91.3935	85.7158	88.5095	1.26837	1.26837	0.00414208	0.0344666
6892191	NM_010226 // Foxs1 // forkhead box S1 // 2|2 H2 // 14239 /// ENSMUST00000099200 // Foxs	Foxs1	NM_010226	chr2	152757637	152758936	-	155.401	139.998	168.203	133.56	148.687	206.757	193.095	199.809	161.196	165.339	163.255	1.34383	1.34383	0.00414288	0.0344666
6833117	NM_021279 // Wnt1 // wingless-related MMTV integration site 1 // 15 F1-F3|15 56.8 cM //	Wnt1	NM_021279	chr15	98620288	98624315	+	86.7944	91.4043	91.7032	82.8558	88.1134	104.071	118.838	111.209	83.6869	84.0555	83.871	1.26212	1.26212	0.00414398	0.0344666
6993524	NM_145712 // Mtnr1b // melatonin receptor 1B // 9 A2|9 // 244701 /// ENSMUST00000057920	Mtnr1b	NM_145712	chr9	15627951	15678904	-	116.044	86.96	110.441	106.022	104.26	146.963	144.767	145.861	100.706	95.1512	97.8893	1.39901	1.39901	0.00414905	0.0344666
6927253	ENSMUST00000030925 // Gabrd // gamma-aminobutyric acid (GABA) A receptor, subunit delta	Gabrd	ENSMUST00000030925	chr4	154759089	154772777	-	161.16	150.028	170.389	137.476	154.267	198.443	208.003	203.167	143.07	150.881	146.924	1.31697	1.31697	0.00416385	0.0344666
6840112	---	---	---	chr16	23175378	23224509	+	72.3374	70.2745	77.3463	65.8632	71.3361	101.883	87.4248	94.3774	71.1331	78.4673	74.7105	1.32299	1.32299	0.00417009	0.0344666
6777933	NM_008382 // Inhbe // inhibin beta E // 10 D3|10 69.0 cM // 16326 /// ENSMUST0000005971	Inhbe	NM_008382	chr10	126785913	126788884	-	115.962	112.157	115.203	98.8254	110.311	137.778	169.528	152.831	110.19	97.2145	103.5	1.38546	1.38546	0.00417073	0.0344666
6825691	NM_021308 // Piwil2 // piwi-like homolog 2 (Drosophila) // 14 D2|14 // 57746 /// ENSMUS	Piwil2	NM_021308	chr14	70772287	70828901	-	84.0374	90.3429	96.3311	84.517	88.6685	108.088	122.488	115.063	94.6283	86.9136	90.6893	1.29768	1.29768	0.00418061	0.0344666
6900265	NM_026013 // Dram2 // DNA-damage regulated autophagy modulator 2 // 3|3 F3 // 67171 ///	Dram2	NM_026013	chr3	106349831	106378757	+	2421.52	2262.5	2408.8	2521.73	2401.8	1975.5	1984.69	1980.16	2333.05	2351.88	2342.45	0.824405	-1.213	0.00419077	0.0344666
7010764	ENSMUST00000115115 // Mcts1 // malignant T cell amplified sequence 1 // X|X A2 // 68995	Mcts1	ENSMUST00000115115	chrX	35533239	35968426	+	374.416	380.262	356.169	368.367	369.695	304.9	293.773	299.284	394.516	445.2	419.094	0.809544	-1.23526	0.00419544	0.0344666
6784132	ENSMUST00000093935 // Krtap31-1 // keratin associated protein 31-1 // 11 D|11 // 70831	Krtap31-1	ENSMUST00000093935	chr11	99769234	99770206	+	22.1535	22.7711	21.7215	22.4529	22.2714	26.4715	34.0466	30.021	27.5962	25.4089	26.48	1.34797	1.34797	0.00420138	0.0344666
6916382	NM_177865 // Skint2 // selection and upkeep of intraepithelial T cells 2 // 4 D1|4 // 3	Skint2	NM_177865	chr4	112238330	112403449	+	19.8763	20.4641	19.9369	20.6536	20.2299	24.215	28.1047	26.0874	20.0845	17.4537	18.723	1.28955	1.28955	0.00420507	0.0344666
6978774	NM_133960 // Ces2a // carboxylesterase 2A // 8 D3|8 // 102022 /// ENSMUST00000034346 //	Ces2a	NM_133960	chr8	107203321	107265532	+	58.3447	67.9796	65.5703	59.889	62.8217	77.9674	99.6315	88.136	64.9686	58.6248	61.715	1.40296	1.40296	0.00420556	0.0344666
6748545	NM_007685 // Cfc1 // cripto, FRL-1, cryptic family 1 // 1 B|1 // 12627 /// ENSMUST00000	Cfc1	NM_007685	chr1	34592493	34601156	+	128.624	115.033	134.025	111.751	122.01	158.591	169.848	164.123	124.014	107.321	115.366	1.34516	1.34516	0.0042072	0.0344666
6855061	NM_008198 // Cfb // complement factor B // 17 B1|17 18.85 cM // 14962 /// NM_001142706	Cfb	NM_008198	chr17	34992819	34999443	-	138.061	132.541	151.158	123.972	136.08	174.339	175.058	174.698	137.961	136.004	136.98	1.28379	1.28379	0.00420996	0.0344666
6850798	NM_011549 // Tfeb // transcription factor EB // 17 D|17 26.0 cM // 21425 /// ENSMUST000	Tfeb	NM_011549	chr17	47872428	47979320	+	276.428	297.35	331.591	299.11	300.483	369.385	401.98	385.338	307.401	310.81	309.1	1.28239	1.28239	0.00421342	0.0344666
6955350	NM_001142724 // Kbtbd12 // kelch repeat and BTB (POZ) domain containing 12 // 6 D1|6 //	Kbtbd12	NM_001142724	chr6	88497559	88587924	-	42.712	40.1642	46.1872	45.6173	43.6022	52.7179	59.9397	56.2129	46.2977	44.0524	45.1611	1.28922	1.28922	0.00421847	0.0344666
6789161	NM_175681 // Glp2r // glucagon-like peptide 2 receptor // 11 B3|11 // 93896 /// ENSMUST	Glp2r	NM_175681	chr11	67475004	67584655	-	101.588	109.473	115.04	108.426	108.525	130.648	150.217	140.091	119.206	108.056	113.494	1.29086	1.29086	0.00422373	0.0344666
6996308	NM_144813 // Slc24a1 // solute carrier family 24 (sodium/potassium/calcium exchanger),	Slc24a1	NM_144813	chr9	64769951	64799407	-	117.517	117.225	137.459	119.576	122.669	156.04	157.509	156.773	126.774	119.118	122.886	1.27801	1.27801	0.0042286	0.0344666
6800233	ENSMUST00000001672 // Ifrd1 // interferon-related developmental regulator 1 // 12 B1|12	Ifrd1	ENSMUST00000001672	chr12	40928154	40974646	-	487.365	505.715	431.869	507.618	482.127	375.768	324.537	349.215	443.774	534.15	486.869	0.724319	-1.38061	0.00422964	0.0344666
6963977	ENSMUST00000047025 // Otoa // otoancorin // 7 F2|7 // 246190 /// NM_139310 // Otoa // o	Otoa	ENSMUST00000047025	chr7	128225184	128363920	+	100.678	99.5611	102.446	86.7661	97.1552	122.794	123.908	123.35	98.4289	96.8312	97.6271	1.26962	1.26962	0.00423171	0.0344666
6822729	NM_080433 // Fezf2 // Fez family zinc finger 2 // 14 A1|14 // 54713 /// ENSMUST00000022	Fezf2	NM_080433	chr14	13134877	13178453	-	148.606	160.462	159.745	131.494	149.601	202.992	200.114	201.548	150.415	130.363	140.031	1.34723	1.34723	0.00423254	0.0344666
6767797	NM_001159389 // Rfx6 // regulatory factor X, 6 // 10 B3|10 // 320995 /// ENSMUST0000012	Rfx6	NM_001159389	chr10	51397560	51450235	+	39.1207	40.477	43.6255	39.5863	40.6654	51.2049	61.2416	55.9986	44.3496	36.1404	40.035	1.37706	1.37706	0.00423363	0.0344666
6765129	NM_010607 // Kcnk2 // potassium channel, subfamily K, member 2 // 1 H6|1 // 16526 /// E	Kcnk2	NM_010607	chr1	191031813	191229415	-	329.056	330.45	325.459	347.739	333.067	394.114	448.424	420.392	364.911	329.737	346.877	1.26219	1.26219	0.00424711	0.0345127
6770282	NM_146240 // Rassf9 // Ras association (RalGDS/AF-6) domain family (N-terminal) member	Rassf9	NM_146240	chr10	101974820	102009184	+	199.479	240.718	198.513	239.211	218.521	155.728	153.202	154.46	281.311	230.792	254.802	0.70684	-1.41475	0.00425569	0.0345127
6871511	NM_009852 // Cd6 // CD6 antigen // 19 A|19 5.0 cM // 12511 /// ENSMUST00000080292 // Cd	Cd6	NM_009852	chr19	10863851	10904548	-	118.19	129.177	141.88	111.368	124.627	163.663	170.524	167.057	121.461	118.994	120.221	1.34047	1.34047	0.00425766	0.0345127
6766470	NM_198193 // Raet1e // retinoic acid early transcript 1E // 10 A3|10 // 379043 /// ENSM	Raet1e	NM_198193	chr10	21878410	21918600	+	287.654	325.775	287.752	287.638	296.766	158.494	199.197	177.684	204.847	320.898	256.387	0.598734	-1.67019	0.00426695	0.0345127
6993305	BC115525 // 9230110C19Rik // RIKEN cDNA 9230110C19 gene // 9 A1|9 // 234912 /// BC13366	9230110C19Rik	BC115525	chr9	8021417	8042839	-	866.106	844.158	759.686	934.849	848.87	626.348	677.145	651.251	779.908	802.362	791.058	0.767195	-1.30345	0.00426739	0.0345127
6929125	NM_177869 // Fam185a // family with sequence similarity 185, member A // 5 A3|5 // 3300	Fam185a	NM_177869	chr5	20930726	20987932	+	391.186	411.321	368.285	394.781	391.088	329.981	305.375	317.44	420.715	405.95	413.267	0.811681	-1.23201	0.00427245	0.0345127
6967096	NM_175318 // Spty2d1 // SPT2, Suppressor of Ty, domain containing 1 (S. cerevisiae) //	Spty2d1	NM_175318	chr7	54245766	54263785	-	696.544	649.389	608.84	702.615	663.237	516.495	540.957	528.584	651.549	649.88	650.714	0.796977	-1.25474	0.00428058	0.0345127
6892767	NM_013935 // Ptpla // protein tyrosine phosphatase-like (proline instead of catalytic a	Ptpla	NM_013935	chr2	162687219	162725454	-	16.9674	23.5785	35.8679	28.1773	25.2164	71.557	49.2312	59.3535	43.3049	31.9552	37.1997	2.35376	2.35376	0.00428184	0.0345127
6899651	NM_153121 // Lysmd1 // LysM, putative peptidoglycan-binding, domain containing 1 // 3|3	Lysmd1	NM_153121	chr3	94935404	94943442	+	127.266	159.309	141.346	127.604	138.285	223.356	178.755	199.815	172.71	156.029	164.158	1.44495	1.44495	0.00428361	0.0345127
6813518	ENSMUST00000022023 // Trpc7 // transient receptor potential cation channel, subfamily C	Trpc7	ENSMUST00000022023	chr13	56874469	57161117	-	76.1795	83.9547	89.393	76.795	81.4013	100.382	109.549	104.865	81.9169	78.9655	80.4277	1.28825	1.28825	0.00428485	0.0345127
6869293	ENSMUST00000025680 // Lipf // lipase, gastric // 19 C1|19 // 67717 /// NM_026334 // Lip	Lipf	ENSMUST00000025680	chr19	33995211	34051294	+	31.1893	32.8816	34.7091	31.0644	32.4276	40.4105	49.4648	44.7092	37.4657	31.2792	34.2331	1.37873	1.37873	0.00428895	0.0345127
6913525	NM_146858 // Olfr275 // olfactory receptor 275 // 4 B2-C2|4 // 258857 /// ENSMUST000000	Olfr275	NM_146858	chr4	52827486	52841131	+	65.6576	77.4316	68.8488	70.6251	70.5126	88.4408	121.004	103.449	73.4031	82.6825	77.9048	1.46711	1.46711	0.00429778	0.0345326
6850235	NM_177635 // H2-M11 // histocompatibility 2, M region locus 11 // 17 B1|17 // 224754 //	H2-M11	NM_177635	chr17	36645758	36696390	+	51.0893	46.6967	57.0403	47.1158	50.32	73.2888	64.8997	68.9668	54.7501	47.7031	51.1053	1.37056	1.37056	0.00430045	0.0345326
6888483	NM_146594 // Olfr1100 // olfactory receptor 1100 // 2 E1|2 // 258587 /// ENSMUST0000009	Olfr1100	NM_146594	chr2	86817986	86826184	-	12.0895	12.5676	15.646	14.0086	13.5087	21.6285	18.9357	20.2374	15.1745	11.8235	13.3946	1.4981	1.4981	0.00430806	0.0345574
6762094	NM_010016 // Cd55 // CD55 antigen // 1 E4|1 67.6 cM // 13136 /// ENSMUST00000027650 //	Cd55	NM_010016	chr1	132326379	132359520	-	501.369	483.459	500.512	632.675	526.354	398.396	346.49	371.536	425.148	424.209	424.679	0.70587	-1.41669	0.00431333	0.0345633
6974129	NM_001242368 // F10 // coagulation factor X // 8 A1.1|8 7.0 cM // 14058 /// NM_007972 /	F10	NM_001242368	chr8	13037322	13056656	+	116.943	107.883	131.554	109.556	116.123	156.726	150.858	153.765	128.443	115.544	121.823	1.32415	1.32415	0.00431784	0.0345633
6791344	NM_025720 // Krtap3-2 // keratin associated protein 3-2 // 11 D|11 // 66708 /// ENSMUST	Krtap3-2	NM_025720	chr11	99417147	99418157	-	24.7504	44.8669	23.4798	33.9705	30.6779	58.6204	66.5552	62.4621	24.8747	26.3184	25.5863	2.03605	2.03605	0.0043331	0.0346175
6788083	BC049762 // BC049762 // cDNA sequence BC049762 // 11 B1.3|11 // 193286 /// BC049762 //	BC049762	BC049762	chr11	51062885	51077144	-	87.4842	86.1919	81.0107	65.5085	79.5351	118.384	117.862	118.123	93.8686	75.7472	84.3227	1.48516	1.48516	0.00433367	0.0346175
6919407	NM_010945 // Nsmaf // neutral sphingomyelinase (N-SMase) activation associated factor /	Nsmaf	NM_010945	chr4	6323359	6421204	-	1052.57	1006.11	967.133	1057.47	1020.15	851.799	816.891	834.166	974.758	1040.53	1007.11	0.817689	-1.22296	0.0043715	0.0348107
6966298	NM_021397 // Zbtb32 // zinc finger and BTB domain containing 32 // 7 B2-B3|7 // 58206 /	Zbtb32	NM_021397	chr7	31374701	31384073	-	189.915	205.02	226.906	198.587	204.662	252.329	270.372	261.194	215.602	214.84	215.222	1.27622	1.27622	0.00437361	0.0348107
7010645	NM_133990 // Il13ra1 // interleukin 13 receptor, alpha 1 // X A3.3|X 12.5 cM // 16164 /	Il13ra1	NM_133990	chrX	33652024	33711249	+	1179.12	1131.72	1054.98	1178.47	1134.94	942.481	900.043	921.014	1159.19	1111.43	1135.1	0.811526	-1.23225	0.00437882	0.0348107
6873893	NM_001081076 // Gucy2g // guanylate cyclase 2g // 19 D2|19 53.0 cM // 73707 /// ENSMUST	Gucy2g	NM_001081076	chr19	55271090	55326492	-	92.0917	89.0973	101.521	86.3701	92.0981	112.149	122.662	117.287	92.5955	90.6296	91.6073	1.27351	1.27351	0.00438203	0.0348107
6945108	NM_029373 // 1700025E21Rik // RIKEN cDNA 1700025E21 gene // 6 A3.3|6 // 75647 /// ENSMU	1700025E21Rik	NM_029373	chr6	30459849	30470253	+	76.754	82.377	91.1443	83.0202	83.1676	100.643	118.763	109.328	79.0684	78.9151	78.9917	1.31455	1.31455	0.00438364	0.0348107
6875832	NM_001001322 // Adamts13 // a disintegrin-like and metallopeptidase (reprolysin type) w	Adamts13	NM_001001322	chr2	26828946	26864967	+	190.679	190.388	212.293	197.696	197.569	238.828	243.914	241.358	194.805	192.386	193.591	1.22164	1.22164	0.00438942	0.0348107
6838376	NM_010679 // Lalba // lactalbumin, alpha // 15 F1|15 // 16770 /// ENSMUST00000023726 //	Lalba	NM_010679	chr15	98310839	98313102	-	79.4354	65.0817	82.3707	72.7452	74.6039	116.917	95.428	105.627	76.9532	71.9115	74.3896	1.41584	1.41584	0.00438973	0.0348107
6884253	BC051628 // BC051628 // cDNA sequence BC051628 // 2 H4|2 // 332713 /// ENSMUST000000500	BC051628	BC051628	chr2	180947323	180957556	+	155.86	163.233	181.161	156.586	163.904	241.065	198.55	218.777	168.231	163.909	166.055	1.33479	1.33479	0.00440896	0.0349228
6833997	NM_178717 // Rxfp3 // relaxin family peptide receptor 3 // 15 A1|15 // 239336 /// ENSMU	Rxfp3	NM_178717	chr15	10963482	10967736	-	104.133	95.0536	96.9501	93.0994	97.2219	120.356	119.512	119.933	118.985	129.187	123.981	1.2336	1.2336	0.00441402	0.0349228
6984312	---	---	---	chr8	95205763	95339290	-	121.423	115.406	123.986	127.577	122.016	157.648	143.215	150.258	112.471	114.316	113.39	1.23146	1.23146	0.00442414	0.0349228
6889718	NM_146262 // Olfr1290 // olfactory receptor 1290 // 2 E3|2 // 257662 /// ENSMUST0000009	Olfr1290	NM_146262	chr2	111329375	111349428	-	22.5807	16.7306	19.5328	22.9053	20.2763	30.3893	31.1699	30.777	18.0588	14.5941	16.2343	1.51789	1.51789	0.00442766	0.0349228
6899424	NM_011469 // Sprr2b // small proline-rich protein 2B // 3 F1|3 45.2 cM // 20756 /// ENS	Sprr2b	NM_011469	chr3	92120627	92122007	+	56.5557	63.3306	44.2695	52.3392	53.6728	77.3645	124.587	98.1768	67.9763	55.7415	61.5557	1.82916	1.82916	0.00443428	0.0349228
6882442	NM_001012392 // Bpifb1 // BPI fold containing family B, member 1 // 2 H1|2 // 228801 //	Bpifb1	NM_001012392	chr2	154016554	154046888	+	54.8196	63.98	64.0133	51.5729	58.3334	77.3597	80.4383	78.884	55.7288	52.7186	54.203	1.35229	1.35229	0.00443616	0.0349228
6785530	ENSMUST00000039088 // Tex19.1 // testis expressed gene 19.1 // 11 E2|11 // 73679 /// NM	Tex19.1	ENSMUST00000039088	chr11	120986026	121021320	+	129.115	134.426	169.425	140.495	142.569	190.467	207.464	198.784	148.962	137.604	143.17	1.3943	1.3943	0.00444411	0.0349228
6960344	NM_182993 // Slc17a7 // solute carrier family 17 (sodium-dependent inorganic phosphate	Slc17a7	NM_182993	chr7	52417606	52431509	+	134.896	138.168	139.9	130.287	135.763	167.639	163.588	165.601	133.123	120.938	126.884	1.21978	1.21978	0.00444658	0.0349228
6808612	AY344585 // Gm10759 // predicted gene 10759 // --- // 100126879 /// AY344585 // Gm10759	Gm10759	AY344585	chr13	83740517	83741919	+	170.131	158.978	149.943	180.995	164.599	128.62	120.789	124.642	160.967	183.239	171.742	0.757249	-1.32057	0.00445114	0.0349228
6889715	NM_146907 // Olfr1282 // olfactory receptor 1282 // 2 E3|2 // 258909 /// ENSMUST0000009	Olfr1282	NM_146907	chr2	111175316	111176233	-	24.9566	23.0129	19.6289	21.9298	22.2983	13.0441	17.4356	15.0808	20.8105	22.5102	21.6436	0.67632	-1.47859	0.00445236	0.0349228
6762964	ENSMUST00000111913 // BC003331 // cDNA sequence BC003331 // 1 G1|1 // 226499 /// NM_145	BC003331	ENSMUST00000111913	chr1	152183263	152240229	-	1090.29	1090.37	964.355	1130.23	1066.89	870.94	793.397	831.262	963.146	1035.56	998.695	0.779129	-1.28348	0.00445605	0.0349228
6909794	NR_037975 // Gm5105 // predicted gene 5105 // 3 G3|3 // 329763	Gm5105	NR_037975	chr3	137693687	137730352	-	91.3403	79.2111	102.489	86.5547	89.5065	145.12	115.763	129.612	86.6249	96.3565	91.3612	1.44808	1.44808	0.00446231	0.0349228
6811530	NM_020034 // Hist1h1b // histone cluster 1, H1b // 13|13 A2-A3 // 56702 /// ENSMUST0000	Hist1h1b	NM_020034	chr13	21871756	21872474	-	3740.2	4101.97	3894.71	3976.55	3926.15	3148.61	3057.85	3102.9	3692.29	4322.95	3995.06	0.790315	-1.26532	0.00446326	0.0349228
6830766	---	---	---					1160.07	1067.63	1119.24	1090.07	1108.74	935.018	811.035	870.82	933.722	1034.06	982.607	0.785433	-1.27318	0.00448302	0.0349679
6958256	ENSMUST00000032386 // Bhlhe41 // basic helix-loop-helix family, member e41 // 6 G2-G3|6	Bhlhe41	ENSMUST00000032386	chr6	145805834	145827266	-	249.952	221.936	249.753	252.14	243.114	194.491	193.817	194.153	267.579	246.288	256.713	0.798612	-1.25217	0.00449301	0.0349679
6934568	NM_021311 // Piwil1 // piwi-like homolog 1 (Drosophila) // 5 G1.3|5 72.0 cM // 57749 //	Piwil1	NM_021311	chr5	129200956	129261349	+	109.012	112.038	125	102.839	111.938	147.315	143.005	145.144	125.328	114.382	119.73	1.29665	1.29665	0.0044965	0.0349679
6782298	NM_001172686 // Olfr376 // olfactory receptor 376 // 11 B4|11 // 258924 /// ENSMUST0000	Olfr376	NM_001172686	chr11	73184794	73189206	+	16.5948	23.5411	24.852	22.5107	21.6216	38.7706	31.8436	35.1368	25.0983	22.189	23.5988	1.62508	1.62508	0.00449759	0.0349679
6990017	NM_026635 // Fam96a // family with sequence similarity 96, member A // 9|9 D // 68250 /	Fam96a	NM_026635	chr9	65972277	65986747	+	1871.53	1884.81	1903.84	1947.62	1901.73	1589.77	1549.84	1569.73	1875.03	2075.29	1972.62	0.825391	-1.21155	0.00449991	0.0349679
6872530	ENSMUST00000143467 // 5033414D02Rik // RIKEN cDNA 5033414D02 gene // 19 C1|19 // 67759	5033414D02Rik	ENSMUST00000143467	chr19	29423096	29442008	-	931.537	848.017	806.237	877.813	864.702	680.716	707.443	693.951	814.974	860.881	837.613	0.80253	-1.24606	0.00450074	0.0349679
6805599	NM_019991 // Prl2a1 // prolactin family 2, subfamily a, member 1 // 13 A3.1|13 14.0 cM	Prl2a1	NM_019991	chr13	27893523	27900588	+	54.7399	54.4089	59.4008	54.7365	55.784	69.8302	80.1072	74.7924	54.8987	67.4002	60.8291	1.34075	1.34075	0.00450104	0.0349679
6836305	NM_152923 // Kcnq3 // potassium voltage-gated channel, subfamily Q, member 3 // 15 D1-D	Kcnq3	NM_152923	chr15	65817968	66118203	-	181.264	192.974	201.396	174.75	187.313	236.337	230.021	233.157	205.826	198.605	202.183	1.24474	1.24474	0.00451199	0.0350173
6756815	ENSMUST00000027050 // Cops5 // COP9 (constitutive photomorphogenic) homolog, subunit 5	Cops5	ENSMUST00000027050	chr1	10014683	10028315	-	1422.68	1432.58	1354.83	1447.25	1413.93	1177.98	1025.42	1099.02	1359.63	1567.99	1460.15	0.77733	-1.28645	0.00452242	0.0350627
7014836	ENSMUST00000112456 // Sh3kbp1 // SH3-domain kinase binding protein 1 // X F4|X // 58194	Sh3kbp1	ENSMUST00000112456	chrX	156064248	156458410	+	1435.66	1506.1	1423.37	1462.38	1456.51	1167.17	1090.6	1128.27	1303.52	1586.25	1437.95	0.774601	-1.29099	0.00452755	0.0350669
6787931	NM_011579 // Tgtp1 // T cell specific GTPase 1 // 11 B1.2|11 // 21822 /// NM_001145164	Tgtp1	NM_011579	chr11	48871624	48894983	-	13.1879	19.0475	23.3712	22.8087	19.1293	46.207	44.5289	45.36	37.0708	19.062	26.5828	2.37125	2.37125	0.00453918	0.0351214
6887082	NM_008867 // Pla2r1 // phospholipase A2 receptor 1 // 2 C1.1|2 // 18779 /// ENSMUST0000	Pla2r1	NM_008867	chr2	60247472	60391345	-	145.131	147.412	153.736	138.39	146.064	174.222	181.062	177.609	146.646	140.531	143.555	1.21597	1.21597	0.00454461	0.0351279
6932603	NM_013470 // Anxa3 // annexin A3 // 5 E3|5 54.0 cM // 11745 /// ENSMUST00000031447 // A	Anxa3	NM_013470	chr5	97222314	97289589	+	573.786	577.673	549.193	541.006	560.197	411.986	482.565	445.883	536.446	539.291	537.869	0.795938	-1.25638	0.00455455	0.0351287
6965885	NM_026862 // Cd177 // CD177 antigen // 7 A3|7 // 68891 /// ENSMUST00000063956 // Cd177	Cd177	NM_026862	chr7	25514738	25627224	-	170.558	172.735	189.539	151.038	170.416	217.452	228.617	222.964	165.508	160.784	163.129	1.30836	1.30836	0.0045549	0.0351287
6864698	NM_172831 // E230025N22Rik // Riken cDNA E230025N22 gene // 18 B2|18 // 240216 /// ENSM	E230025N22Rik	NM_172831	chr18	36844587	36856133	-	211.75	200.517	228.46	206.993	211.683	255.226	265.961	260.538	199.93	203.609	201.762	1.23079	1.23079	0.00455992	0.0351287
6881169	NM_138655 // Tmc2 // transmembrane channel-like gene family 2 // 2 F1|2 // 192140 /// E	Tmc2	NM_138655	chr2	130020927	130090181	+	64.8673	64.8251	74.401	66.6854	67.584	83.4078	92.993	88.0701	61.7612	69.9387	65.7227	1.30312	1.30312	0.0045631	0.0351287
6854895	NM_177359 // Zfp799 // zinc finger protein 799 // 17 B1|17 // 240064 /// ENSMUST0000007	Zfp799	NM_177359	chr17	32925794	32986811	-	811.406	917.16	754.151	930.898	850.183	644.515	561.398	601.525	789.661	946.035	864.319	0.707524	-1.41338	0.00457893	0.0351818
6971996	NM_021302 // Stk32c // serine/threonine kinase 32C // 7 F4|7 // 57740 /// ENSMUST000000	Stk32c	NM_021302	chr7	146289538	146399184	-	130.318	134.293	152.058	136.573	138.072	183.354	167.324	175.155	151.398	145.82	148.582	1.26858	1.26858	0.00458416	0.0351818
6775155	NM_010361 // Gstt2 // glutathione S-transferase, theta 2 // 10 B5-C1|10 40.9 cM // 1487	Gstt2	NM_010361	chr10	75293925	75300149	-	306.976	270.274	279.738	251.355	276.367	350.804	357.537	354.156	289.33	280.065	284.659	1.28146	1.28146	0.00458466	0.0351818
6946431	NM_011153 // Ppp1r17 // protein phosphatase 1, regulatory subunit 17 // 6 C1|6 23.22 cM	Ppp1r17	NM_011153	chr6	55967489	55982677	+	36.5194	32.2935	41.8495	33.7943	35.937	52.4253	49.359	50.8692	38.3592	31.9734	35.021	1.4155	1.4155	0.00458877	0.0351818
6963253	NM_147033 // Olfr714 // olfactory receptor 714 // 7 E3|7 // 259035 /// ENSMUST000000546	Olfr714	NM_147033	chr7	114217344	114218293	+	86.5025	80.7545	69.8482	71.1272	76.7529	100.563	103.061	101.805	65.4572	63.2955	64.367	1.32639	1.32639	0.0045953	0.0351818
6950639	NM_007605 // Capza3 // capping protein (actin filament) muscle Z-line, alpha 3 // 6 G2|	Capza3	NM_007605	chr6	139990044	139999661	+	44.8728	43.3061	50.8121	42.8775	45.361	66.452	56.1389	61.0784	47.4959	52.581	49.9738	1.34649	1.34649	0.0046012	0.0351818
7005072	---	---	---	chr14	54150447	54158471	+	29.9223	29.6981	36.2518	36.5665	32.9446	49.3333	42.6907	45.892	33.9488	33.4984	33.7227	1.393	1.393	0.00460459	0.0351818
6814151	---	---	---	chr13	69681924	69682901	-	157.795	131.426	148.361	126.271	140.394	177.702	219.714	197.595	157.611	158.406	158.008	1.40742	1.40742	0.00461316	0.0351818
6755298	NM_146722 // Olfr429 // olfactory receptor 429 // 1 H4|1 // 258717 /// ENSMUST000000606	Olfr429	NM_146722	chr1	176019173	176020111	+	355.181	326.204	469.5	380.447	379.285	539.56	600.908	569.408	553.7	498.148	525.192	1.50126	1.50126	0.00461525	0.0351818
6832092	NM_145132 // Mchr1 // melanin-concentrating hormone receptor 1 // 15 E1|15 // 207911 //	Mchr1	NM_145132	chr15	80970766	81069374	+	127.43	117.661	111.869	105.374	115.303	145.489	194.37	168.163	116.45	101.896	108.93	1.45845	1.45845	0.00461602	0.0351818
6782626	ENSMUST00000093995 // Sez6 // seizure related gene 6 // 11 B5|11 44.83 cM // 20370 ///	Sez6	ENSMUST00000093995	chr11	77744026	77792550	+	186.115	197.87	227.924	176.59	196.213	261.446	265.504	263.467	185.991	181.57	183.768	1.34276	1.34276	0.00462432	0.0352099
6989554	NM_175235 // Celf6 // CUGBP, Elav-like family member 6 // 9 B|9 // 76183 /// ENSMUST000	Celf6	NM_175235	chr9	59425207	59455397	+	157.064	167.899	199.852	159.909	170.383	248.331	225.93	236.865	191.327	167.11	178.81	1.39019	1.39019	0.00463217	0.0352197
6781259	NM_001083884 // 2210415F13Rik // RIKEN cDNA 2210415F13 gene // 11 B1.3|11 // 70163 ///	2210415F13Rik	NM_001083884	chr11	58192548	58204041	+	62.0221	66.6028	61.3938	55.918	61.3661	75.5746	84.1826	79.7626	62.0371	56.3315	59.1153	1.29978	1.29978	0.00464032	0.0352197
6809810	NM_030731 // Trim23 // tripartite motif-containing 23 // 13 D1|13 // 81003 /// ENSMUST0	Trim23	NM_030731	chr13	104968142	104994483	+	1202.82	1197.74	1091.65	1245.23	1182.97	978.081	746.542	854.508	1131.01	1211.18	1170.41	0.722338	-1.38439	0.0046435	0.0352197
6824760	NM_207131 // Cebpe // CCAAT/enhancer binding protein (C/EBP), epsilon // 14 C1|14 20.5	Cebpe	NM_207131	chr14	55329200	55331238	-	135.169	143.616	144.215	131.921	138.628	184.787	204.418	194.355	113.712	152.156	131.537	1.40199	1.40199	0.00464403	0.0352197
6933459	NM_016681 // Chek2 // checkpoint kinase 2 // 5 F|5 // 50883 /// ENSMUST00000066160 // C	Chek2	NM_016681	chr5	111261166	111303236	+	534.564	539.396	470.643	565.738	526.383	361.307	431.645	394.913	482.927	481.903	482.415	0.750235	-1.33292	0.00466131	0.0353157
6849572	NM_001081315 // Brpf3 // bromodomain and PHD finger containing, 3 // 17 A3.3|17 // 2689	Brpf3	NM_001081315	chr17	28937647	28975714	+	572.023	616.249	605.188	563.679	588.876	698.003	730.211	713.926	626.404	611.895	619.105	1.21236	1.21236	0.00467688	0.0353772
6978784	NM_172759 // Ces2e // carboxylesterase 2E // 8 D3|8 // 234673 /// ENSMUST00000034355 //	Ces2e	NM_172759	chr8	107450170	107458555	+	66.6088	58.6997	76.4524	64.9474	66.3788	86.0987	97.2631	91.5108	68.9697	63.1443	65.9925	1.37861	1.37861	0.00467867	0.0353772
6871647	ENSMUST00000071484 // Olfr1447 // olfactory receptor 1447 // 19 C1|19 // 258698 /// NM_	Olfr1447	ENSMUST00000071484	chr19	12975313	12978200	-	25.1886	16.6311	16.1022	14.5831	17.7098	41.3756	29.8298	35.1317	16.2235	12.1876	14.0615	1.98373	1.98373	0.00469447	0.0354306
6942982	NM_001013774 // Kpna7 // karyopherin alpha 7 (importin alpha 8) // 5 G2|5 // 381686 ///	Kpna7	NM_001013774	chr5	145744411	145770492	-	68.2582	73.6161	73.9363	63.2477	69.6239	85.2371	95.078	90.0235	72.369	67.7627	70.028	1.293	1.293	0.004695	0.0354306
6777306	NM_029906 // 9530003J23Rik // RIKEN cDNA 9530003J23 gene // 10 D2|10 // 77397 /// ENSMU	9530003J23Rik	NM_029906	chr10	116666997	116675710	-	50.0792	45.237	54.3365	49.6179	49.713	63.8901	61.7048	62.7877	54.0083	53.4971	53.7521	1.26301	1.26301	0.00470926	0.0354769
6907343	---	---	---					34.4626	35.377	30.3608	31.1588	32.7711	44.2906	42.0021	43.1312	40.2172	34.4256	37.209	1.31613	1.31613	0.00471353	0.0354769
6780349	NM_176999 // Atp10b // ATPase, class V, type 10B // 11 A5|11 // 319767 /// ENSMUST00000	Atp10b	NM_176999	chr11	42885592	43075777	+	138.636	137.408	139.061	138.579	138.42	162.737	162.366	162.551	131.908	132.121	132.014	1.17434	1.17434	0.00471507	0.0354769
6759259	NM_025596 // Prelid1 // PRELI domain containing 1 // 13|13 B2 // 66494 /// BC098241 //	Prelid1	NM_025596	chr1	63410974	63469460	-	298.372	346.795	370.308	339.282	337.668	257.665	262.058	259.851	399.558	378.55	388.912	0.76955	-1.29946	0.00472913	0.0354888
6892896	NM_017390 // Svs2 // seminal vesicle secretory protein 2 // 2 H3|2 80.9 cM // 53878 ///	Svs2	NM_017390	chr2	164061665	164064048	-	57.5447	63.5945	61.3767	59.1448	60.3721	74.6857	84.7388	79.5539	64.7308	53.814	59.0203	1.31772	1.31772	0.00473017	0.0354888
6792324	NR_027643 // 4932435O22Rik // RIKEN cDNA 4932435O22 gene // 11 E2|11 // 319819 /// NR_0	4932435O22Rik	NR_027643	chr11	114274719	114310174	-	71.689	75.7813	74.3386	92.0107	78.0761	100.962	134.358	116.47	81.0202	74.5605	77.723	1.49174	1.49174	0.00473647	0.0354888
6836840	NM_025842 // Vps28 // vacuolar protein sorting 28 (yeast) // 15 D3|15 // 66914 /// ENSM	Vps28	NM_025842	chr15	76452540	76456187	-	2410.64	2353.68	2519.46	2442.6	2430.94	2010.31	1988.27	1999.33	2149.52	2379.76	2261.71	0.82245	-1.21588	0.00473654	0.0354888
6998429	NM_145700 // Ccrl1 // chemokine (C-C motif) receptor-like 1 // 9 F1|9 // 252837 /// ENS	Ccrl1	NM_145700	chr9	103986487	104029263	-	127.015	145.268	134.68	128.747	133.741	161.018	173.561	167.172	136.821	142.767	139.762	1.24996	1.24996	0.00473987	0.0354888
6803577	NM_027299 // Degs2 // degenerative spermatocyte homolog 2 (Drosophila), lipid desaturas	Degs2	NM_027299	chr12	109916320	109940516	-	119.552	136.525	123.507	112.617	122.748	153.136	160.506	156.777	132.92	129.679	131.289	1.27722	1.27722	0.0047451	0.0354933
6756763	---	---	---					61.1932	61.9194	66.2363	55.0717	60.9731	74.3293	85.5852	79.7587	62.6694	59.98	61.31	1.3081	1.3081	0.00475018	0.0354965
6955151	NM_001001160 // Fbxo41 // F-box protein 41 // 6 C3|6 35.5 cM // 330369 /// ENSMUST00000	Fbxo41	NM_001001160	chr6	85420531	85454282	-	211.225	188.086	229.47	201.297	206.975	268.435	261.169	264.778	207.595	209.257	208.424	1.27928	1.27928	0.00475828	0.0355223
6871517	ENSMUST00000025641 // Zp1 // zona pellucida glycoprotein 1 // 19 A|19 2.0 cM // 22786 /	Zp1	ENSMUST00000025641	chr19	10988779	10995122	-	84.8769	84.6079	86.5439	79.4051	83.8152	97.3858	110.6	103.783	82.9644	82.9304	82.9477	1.23824	1.23824	0.00477868	0.0355733
6972592	ENSMUST00000011407 // Exoc3l2 // exocyst complex component 3-like 2 // 7 A3|7 // 74463	Exoc3l2	ENSMUST00000011407	chr7	20074401	20082111	+	222.172	231.879	241.978	219.467	228.704	273.603	281.902	277.721	235.762	225.073	230.356	1.21433	1.21433	0.00478269	0.0355733
6783367	ENSMUST00000024486 // Mrps23 // mitochondrial ribosomal protein S23 // 11 C|11 48.0 cM	Mrps23	ENSMUST00000024486	chr11	88017910	88025008	+	1616.1	1640.82	1594.84	1717.15	1641.61	1410.31	1272.81	1339.8	1622.38	1543.19	1582.29	0.81616	-1.22525	0.0047867	0.0355733
6892423	NM_133242 // Rbm39 // RNA binding motif protein 39 // 2 H1|2 // 170791 /// ENSMUST00000	Rbm39	NM_133242	chr2	155971358	156029203	-	4778.03	4599.94	4627.77	4706.7	4677.75	3947.98	3090.66	3493.12	4390.9	4885.53	4631.62	0.746778	-1.33909	0.00479199	0.0355733
6895959	NM_001253391 // Mtfr1 // mitochondrial fission regulator 1 // 3 A2|3 // 67472 /// NR_04	Mtfr1	NM_001253391	chr3	19063027	19128016	+	709.766	698.197	681.018	730.358	704.609	548.273	486.748	516.595	638.202	827.273	726.611	0.733168	-1.36394	0.00479258	0.0355733
6844955	NM_001164612 // Atp13a4 // ATPase type 13A4 // 16 B2|16 // 224079 /// ENSMUST0000005701	Atp13a4	NM_001164612	chr16	29395945	29545045	-	58.1167	58.3674	61.3886	59.3522	59.2922	70.148	70.8291	70.4877	62.1546	59.7476	60.9393	1.18882	1.18882	0.00479303	0.0355733
6828697	ENSMUST00000005400 // Prlr // prolactin receptor // 15 A1|15 4.6 cM // 19116 /// ENSMUS	Prlr	ENSMUST00000005400	chr15	10104852	10371811	+	66.1436	61.6488	68.7639	67.29	65.907	77.4885	93.3365	85.0441	67.6679	66.5008	67.0818	1.29037	1.29037	0.00479976	0.0355887
6876279	NR_046275 // C130021I20Rik // Riken cDNA C130021I20 gene // 2 B|2 // 100504399 /// NR_0	C130021I20Rik	NR_046275	chr2	33496733	33501874	+	124.146	129.82	152.76	129.5	133.625	170.649	179.002	174.776	145.269	135.784	140.446	1.30795	1.30795	0.00481516	0.0356548
6772111	---	---	---	chr10	10373700	10827355	-	145.021	155.891	183.7	136.861	154.404	220.845	220.197	220.521	176.373	149.629	162.452	1.4282	1.4282	0.004818	0.0356548
6814382	NM_177333 // Exoc3 // exocyst complex component 3 // 13 C1|13 // 211446 /// ENSMUST0000	Exoc3	NM_177333	chr13	74306956	74346160	-	1281.31	1346.78	1248.95	1330.27	1301.27	1099.25	1044.94	1071.71	1194.76	1284.33	1238.78	0.823634	-1.21413	0.00483215	0.0357249
6867987	NM_009643 // Ahnak // AHNAK nucleoprotein (desmoyokin) // 19 A|19 // 66395 /// ENSMUST0	Ahnak	NM_009643	chr19	9063774	9151404	+	62.5076	66.151	62.5492	56.9795	61.9589	75.2229	78.8282	77.0045	66.5894	63.9171	65.2393	1.24284	1.24284	0.00484001	0.0357299
6912644	NM_199157 // Ifnk // interferon kappa // 4 A5|4 // 387510 /// ENSMUST00000058595 // Ifn	Ifnk	NM_199157	chr4	35099323	35121514	+	83.8669	73.3782	96.983	86.0928	84.6654	139.341	108.838	123.149	102.109	98.0116	100.039	1.45454	1.45454	0.00484451	0.0357299
6927298	ENSMUST00000042196 // Vwa1 // von Willebrand factor A domain containing 1 // 4 E2|4 //	Vwa1	ENSMUST00000042196	chr4	155142278	155148806	-	277.959	269.404	309.179	272.974	281.955	373.416	387.997	380.636	306.844	243.032	273.08	1.34999	1.34999	0.0048479	0.0357299
6916618	NM_175030 // Tctex1d4 // Tctex1 domain containing 4 // 4 D1|4 // 242646 /// ENSMUST0000	Tctex1d4	NM_175030	chr4	116799418	116801336	+	53.4308	64.4952	73.8236	54.9444	61.1449	87.9981	89.0023	88.499	61.4977	63.2555	62.3704	1.44736	1.44736	0.00485152	0.0357299
6916218	---	---	---					2848.33	2947.96	2900.53	3163.27	2962.71	2506.75	2302.36	2402.3	2762.77	2918.07	2839.46	0.810888	-1.23322	0.00486746	0.0357558
7015012	ENSMUST00000033755 // Asb11 // ankyrin repeat and SOCS box-containing 11 // X F5|X // 6	Asb11	ENSMUST00000033755	chrX	160874952	160897096	+	98.9824	104.211	105.228	100.23	102.129	136.877	123.858	130.205	108.614	92.3967	100.178	1.27491	1.27491	0.00487216	0.0357558
6785122	NM_172801 // Otop2 // otopetrin 2 // 11 E2|11 // 237987 /// ENSMUST00000055490 // Otop2	Otop2	NM_172801	chr11	115168477	115193615	+	136.119	133.542	158.207	127.988	138.51	176.388	183.305	179.813	134.542	135.834	135.186	1.29819	1.29819	0.00487967	0.0357558
6945548	ENSMUST00000162554 // Ttc26 // tetratricopeptide repeat domain 26 // 6 B1|6 // 264134 /	Ttc26	ENSMUST00000162554	chr6	38331145	38377640	+	740.641	747.671	660.626	809.232	737.628	578.246	576.857	577.549	726.536	745.105	735.764	0.782985	-1.27716	0.00488109	0.0357558
7018773	ENSMUST00000055497 // Taf9b // TAF9B RNA polymerase II, TATA box binding protein (TBP)-	Taf9b	ENSMUST00000055497	chrX	103402220	103416721	-	1619.58	1757	1647.89	1741.48	1690.46	1363.03	1352.11	1357.56	1453.18	1663.38	1554.68	0.803071	-1.24522	0.00488146	0.0357558
6946018	NR_027236 // AI854703 // expressed sequence AI854703 // 6 B2.3|6 // 243373 /// NR_02723	AI854703	NR_027236	chr6	48573619	48587668	+	156.367	160.386	179.008	157.788	163.141	196.261	216.653	206.206	149.753	158.175	153.906	1.26397	1.26397	0.0048831	0.0357558
6858110	NM_013523 // Fshr // follicle stimulating hormone receptor // 17|17 E5 // 14309 /// ENS	Fshr	NM_013523	chr17	89384292	89714026	-	57.8073	49.413	55.3918	50.8639	53.2622	66.9601	67.133	67.0465	51.6465	54.0791	52.8488	1.2588	1.2588	0.0048941	0.0357691
6774274	NM_025514 // Anapc16 // anaphase promoting complex subunit 16 // 10 B4|10 30.0 cM // 52	Anapc16	NM_025514	chr10	59450076	59466776	-	1755.54	1835.94	1760.17	1924.81	1817.83	1509.02	1510.8	1509.86	1647.89	1645.94	1646.97	0.830614	-1.20393	0.00489427	0.0357691
6949295	NM_001011800 // Olfr212 // olfactory receptor 212 // 6 E3|6 // 258019 /// ENSMUST000000	Olfr212	NM_001011800	chr6	116447168	116467983	+	49.9229	67.0316	62.5115	63.2854	60.3202	82.1301	86.5127	84.2929	53.4734	56.6648	55.0458	1.39743	1.39743	0.00490716	0.0357956
6782861	ENSMUST00000103223 // Spaca3 // sperm acrosome associated 3 // 11 B5|11 // 75622 /// EN	Spaca3	ENSMUST00000103223	chr11	80666256	80685485	+	203.666	203.119	209.236	178.543	198.272	260.97	247.872	254.336	223.815	200.306	211.734	1.28276	1.28276	0.00490726	0.0357956
7018041	NM_212444 // Gyk // glycerol kinase // X C-D|X 33.0 cM // 14933 /// ENSMUST00000156390	Gyk	NM_212444	chrX	82947277	83072628	-	254.456	251.96	202.382	255.415	239.933	183.081	168.999	175.899	236.198	251.658	243.804	0.733117	-1.36404	0.00491643	0.0358283
6790579	NM_080420 // Lpo // lactoperoxidase // 11 C|11 // 76113 /// ENSMUST00000103177 // Lpo /	Lpo	NM_080420	chr11	87609086	87648076	-	126.838	141.432	149.044	129.774	136.481	172.652	171.576	172.113	138.553	133.482	135.994	1.26107	1.26107	0.00492404	0.0358299
6892151	NM_001002791 // Defb22 // defensin beta 22 // 2 H1|2 // 442835 /// ENSMUST00000028966 /	Defb22	NM_001002791	chr2	152308130	152315874	-	62.508	58.4735	66.4584	62.3086	62.3734	81.315	75.4945	78.3505	62.376	56.1203	59.1657	1.25616	1.25616	0.00492603	0.0358299
6924588	NM_177668 // Skint10 // selection and upkeep of intraepithelial T cells 10 // 4 D1|4 //	Skint10	NM_177668	chr4	112377921	112592806	-	14.9502	11.9326	13.2726	13.0248	13.2519	16.5139	19.6784	18.0269	13.2637	14.1086	13.6796	1.36032	1.36032	0.00496436	0.0360744
6807230	NM_011392 // Slc34a1 // solute carrier family 34 (sodium phosphate), member 1 // 13 B|1	Slc34a1	NM_011392	chr13	55492241	55516953	+	151.632	150.428	184.431	158.663	160.734	214.818	207.388	211.07	153.327	165.692	159.39	1.31317	1.31317	0.00498757	0.0361225
6826179	NM_025384 // Dnajc15 // DnaJ (Hsp40) homolog, subfamily C, member 15 // 14 D3|14 // 661	Dnajc15	NM_025384	chr14	78203243	78274916	-	796.444	801.801	710.672	835.867	784.794	598.314	597.66	597.987	731.909	874.328	799.952	0.761964	-1.3124	0.00498799	0.0361225
6987244	NM_025844 // Chordc1 // cysteine and histidine-rich domain (CHORD)-containing, zinc-bin	Chordc1	NM_025844	chr9	18096589	18121873	+	1822.5	2075.15	1752.26	1987.58	1905.03	1534.12	1258.16	1389.36	1903.71	2170.33	2032.73	0.72927	-1.37123	0.00498894	0.0361225
6811600	NM_134217 // Vmn1r205 // vomeronasal 1 receptor 205 // 13 A3.1|13 // 171251 /// ENSMUST	Vmn1r205	NM_134217	chr13	22615791	22688005	-	8.13961	6.2469	7.50775	6.67284	7.10434	9.41734	14.1503	11.5437	7.96233	7.13944	7.53966	1.62489	1.62489	0.00499323	0.0361225
6760518	NM_177305 // Arl4c // ADP-ribosylation factor-like 4C // 1 D|1 // 320982 /// ENSMUST000	Arl4c	NM_177305	chr1	90569702	90617572	-	528.5	530.276	501.512	499.302	514.694	597.283	674.825	634.871	567.8	541.553	554.522	1.2335	1.2335	0.0049946	0.0361225
6856484	---	---	---	chr17	63034949	63036328	-	378.686	395.834	418.018	427.082	404.459	477.587	573.067	523.153	436.837	444.959	440.879	1.29346	1.29346	0.00502125	0.036254
6966159	NM_175319 // C330005M16Rik // RIKEN cDNA C330005M16 gene // 7 A3|7 // 101744 /// ENSMUS	C330005M16Rik	NM_175319	chr7	29380569	29455243	-	125.876	123.443	139.912	117.038	126.298	158.866	164.294	161.557	131.336	119.117	125.078	1.27917	1.27917	0.00502228	0.036254
6927124	ENSMUST00000030785 // Espn // espin // 4 E1|4 80.1 cM // 56226 /// NM_207687 // Espn //	Espn	ENSMUST00000030785	chr4	151494444	151526470	-	293.775	308.766	336.77	297.478	308.751	375.909	387.285	381.556	303.969	294.81	299.354	1.2358	1.2358	0.00502714	0.0362549
6779718	NM_133767 // Mtif2 // mitochondrial translational initiation factor 2 // 11|11 A4 // 76	Mtif2	NM_133767	chr11	29425921	29445452	+	639.903	639.088	564.488	679.335	629.294	508.516	453.705	480.329	625.723	692.822	658.418	0.763283	-1.31013	0.00503314	0.0362549
6979836	NM_010322 // Gnpat // glyceronephosphate O-acyltransferase // 8 E2|8 78.8 cM // 14712 /	Gnpat	NM_010322	chr8	127353538	127415651	+	1227.41	1153.98	1164.83	1207.49	1188.07	996.199	988.838	992.511	1135.49	1209.09	1171.71	0.835415	-1.19701	0.00504742	0.0362549
6812982	NM_175340 // Nhlrc1 // NHL repeat containing 1 // 13 A5|13 // 105193 /// ENSMUST0000005	Nhlrc1	NM_175340	chr13	47107926	47110348	-	749.773	772.58	839.362	763.302	780.514	958.484	937.568	947.965	803.882	786.809	795.297	1.21455	1.21455	0.00505578	0.0362549
6987379	AK020226 // 8030498B09Rik // RIKEN cDNA 8030498B09 gene // 9 A3|9 // 77547 /// AK020226	8030498B09Rik	AK020226	chr9	21194544	21195699	+	574.121	519.446	510.024	543.98	536.327	388.532	454.249	420.106	507.231	531.012	518.985	0.783306	-1.27664	0.00506093	0.0362549
6892139	NM_175093 // Trib3 // tribbles homolog 3 (Drosophila) // 2 G3|2 86.0 cM // 228775 /// E	Trib3	NM_175093	chr2	152163167	152169827	-	218.824	211.359	225.967	220.879	219.195	263.672	278.727	271.094	243.657	213.467	228.063	1.23678	1.23678	0.00506451	0.0362549
6837094	ENSMUST00000039752 // Slc16a8 // solute carrier family 16 (monocarboxylic acid transpor	Slc16a8	ENSMUST00000039752	chr15	79081446	79086302	-	164.888	171.554	185.891	166.772	172.084	206.83	215.28	211.012	174.811	167.978	171.36	1.22621	1.22621	0.00506481	0.0362549
6923154	NM_010507 // Ifna9 // interferon alpha 9 // 4 C4|4 42.6 cM // 15972 /// ENSMUST00000102	Ifna9	NM_010507	chr4	88237396	88238325	-	151.065	115.539	106.117	124.865	123.319	195.883	171.29	183.175	119.728	132.463	125.935	1.48537	1.48537	0.00506922	0.0362549
6811524	NM_146541 // Olfr1361 // olfactory receptor 1361 // 13 A3-A4|13 // 258534 /// ENSMUST00	Olfr1361	NM_146541	chr13	21750237	21751226	-	75.2031	76.8759	94.7905	79.2539	81.181	102.999	138.088	119.259	77.3634	79.8633	78.6034	1.46906	1.46906	0.00507244	0.0362549
6888419	NM_147017 // Olfr1045 // olfactory receptor 1045 // 2 E1|2 // 259019 /// ENSMUST0000009	Olfr1045	NM_147017	chr2	86037983	86038907	-	29.5599	35.2121	23.9938	23.8725	27.7874	46.8631	48.8853	47.8637	31.7446	22.2011	26.5474	1.72249	1.72249	0.00507419	0.0362549
6798318	NM_153776 // Tmem121 // transmembrane protein 121 // 12 F1|12 // 69195 /// ENSMUST00000	Tmem121	NM_153776	chr12	114424132	114427729	+	280.33	266.964	289.697	271.066	276.875	336.029	332.753	334.388	261.307	280.964	270.957	1.20771	1.20771	0.00507696	0.0362549
6769159	NM_013459 // Cfd // complement factor D (adipsin) // 10 C1|10 43.0 cM // 11537 /// ENSM	Cfd	NM_013459	chr10	79353643	79357658	+	136.413	147.567	171.087	139.544	148.062	196.892	192.955	194.913	141.442	145.173	143.296	1.31643	1.31643	0.00507945	0.0362549
6942550	NM_011741 // Zan // zonadhesin // 5 G2|5 78.0 cM // 22635 /// ENSMUST00000117564 // Zan	Zan	NM_011741	chr5	137816129	137918282	-	130.895	124.188	137.646	127.783	130.034	155.266	166.041	160.563	138.092	125.914	131.862	1.23477	1.23477	0.00508405	0.0362549
6856024	AK037647 // Gm5094 // predicted gene 5094 // 17 C|17 // 328839 /// AK037647 // Gm5094 /	Gm5094	AK037647	chr17	52591910	52601080	-	33.7372	35.168	39.8857	34.7249	35.8038	48.7946	44.5459	46.622	30.6327	34.6096	32.5605	1.30215	1.30215	0.00509576	0.0363044
6868199	NM_146303 // Olfr1449 // olfactory receptor 1449 // 19 C1|19 // 258300 /// ENSMUST00000	Olfr1449	NM_146303	chr19	13005359	13010174	+	81.8466	92.4339	98.4071	99.0572	92.6693	135.476	115.67	125.182	78.5773	86.916	82.6412	1.35084	1.35084	0.00510081	0.0363044
6879691	NM_144783 // Wt1 // Wilms tumor 1 homolog // 2 E|2 58.0 cM // 22431 /// ENSMUST00000143	Wt1	NM_144783	chr2	104903773	105013769	+	172.75	170.991	196.343	174.552	178.375	214.34	237.205	225.482	182.793	174.124	178.406	1.2641	1.2641	0.00510524	0.0363044
6963456	NM_009667 // Ampd3 // adenosine monophosphate deaminase 3 // 7 E2-E3|7 52.0 cM // 11717	Ampd3	NM_009667	chr7	117911620	117955919	+	362.546	307.301	345.059	328.191	335.149	426.154	456.693	441.161	373.463	315.166	343.077	1.31631	1.31631	0.00512005	0.0363759
6992849	NM_010136 // Eomes // eomesodermin homolog (Xenopus laevis) // 9 F3|9 67.0 cM // 13813	Eomes	NM_010136	chr9	118387327	118395221	+	180.192	181.032	195.237	171.752	181.861	214.21	245.019	229.096	177.563	172.22	174.871	1.25974	1.25974	0.00514723	0.036535
6921179	NM_019486 // Olfr71 // olfactory receptor 71 // 4 B1|4 // 56015 /// ENSMUST00000055401	Olfr71	NM_019486	chr4	43718508	43729698	-	341.145	376.806	418.267	346.012	369.318	537.623	463.524	499.199	344.808	377.429	360.749	1.35168	1.35168	0.00515415	0.036546
7009773	NM_019582 // Cacna1f // calcium channel, voltage-dependent, alpha 1F subunit // X A1.1|	Cacna1f	NM_019582	chrX	7184219	7212319	+	92.4499	96.3699	103.275	87.9109	94.8358	115.777	123.259	119.459	90.7509	96.7225	93.6891	1.25965	1.25965	0.00515834	0.036546
6939130	NM_026950 // Ociad2 // OCIA domain containing 2 // 5|5 D // 433904 /// ENSMUST000000871	Ociad2	NM_026950	chr5	73713455	73756801	-	616.3	583.937	547.919	494.275	558.743	430.399	430.781	430.59	476.717	486.05	481.359	0.770642	-1.29762	0.00517637	0.0366334
6875836	NM_001243239 // Cacfd1 // calcium channel flower domain containing 1 // 2 A3|2 // 38135	Cacfd1	NM_001243239	chr2	26871824	26871961	+	322.407	358.207	215.287	394.262	314.656	187.289	135.919	159.549	283.034	329.538	305.401	0.507061	-1.97215	0.00518384	0.0366334
6832395	NM_028063 // Trmu // tRNA 5-methylaminomethyl-2-thiouridylate methyltransferase // 15 E	Trmu	NM_028063	chr15	85709753	85727822	+	355.267	328.163	320.744	340.894	336.012	273.652	279.78	276.698	321.691	342.094	331.736	0.823478	-1.21436	0.00518729	0.0366334
6834728	NM_027496 // Ankrd33b // ankyrin repeat domain 33B // 15|15 B3.2 // 67434 /// NM_001164	Ankrd33b	NM_027496	chr15	31220639	31256791	-	170.018	170.255	200.206	175.747	178.645	226.967	224.419	225.69	174.304	167.578	170.907	1.26334	1.26334	0.00518984	0.0366334
6787967	NM_212484 // Cnot6 // CCR4-NOT transcription complex, subunit 6 // 11 B1.2|11 // 104625	Cnot6	NM_212484	chr11	49471609	49542532	-	3780.86	3997.83	3793.2	3875.59	3860.84	3297.14	2951.02	3119.29	3586.85	3963.06	3770.4	0.807915	-1.23775	0.00520113	0.0366792
6828743	NM_053077 // Slc45a2 // solute carrier family 45, member 2 // 15 A1|15 6.7 cM // 22293	Slc45a2	NM_053077	chr15	10930476	10961429	+	165.25	171.939	208.231	175.035	179.389	228.999	267.696	247.594	199.848	178.331	188.782	1.3802	1.3802	0.00522304	0.0367154
7015028	NM_001146081 // Fancb // Fanconi anemia, complementation group B // X F5|X // 237211 //	Fancb	NM_001146081	chrX	161418564	161438531	+	171.885	183.353	157.445	204.604	178.501	130.46	133.27	131.857	157.449	175.138	166.059	0.738691	-1.35375	0.00522939	0.0367154
6765513	NM_175374 // Mtrf1l // mitochondrial translational release factor 1-like // 10 A1|10 //	Mtrf1l	NM_175374	chr10	4522345	4534257	+	514.184	502.646	482.221	482.783	495.273	400.781	405.017	402.895	465.682	529.758	496.686	0.813478	-1.22929	0.00523503	0.0367154
6769213	NM_183152 // Plk5 // polo-like kinase 5 // 10 C1|10 // 216166 /// ENSMUST00000039836 //	Plk5	NM_183152	chr10	79817285	79828026	+	185.867	187.788	202.719	186.196	190.518	221.664	248.791	234.836	186.098	182.369	184.224	1.23262	1.23262	0.00523612	0.0367154
6774676	NM_001036293 // Nrbf2 // nuclear receptor binding factor 2 // 10 B5.1|10 // 641340 ///	Nrbf2	NM_001036293	chr10	66729124	66797942	-	855.996	829.731	1053.37	854.33	894.142	1185.35	1233.04	1208.92	970.094	879.665	923.776	1.3521	1.3521	0.00523693	0.0367154
6760306	ENSMUST00000027422 // Slc16a14 // solute carrier family 16 (monocarboxylic acid transpo	Slc16a14	ENSMUST00000027422	chr1	84902046	84931841	-	146.474	117.279	152.114	165.379	144.181	199.465	215.803	207.473	151.523	156.815	154.147	1.43898	1.43898	0.00524267	0.0367154
6900216	NM_175398 // 6530418L21Rik // RIKEN cDNA 6530418L21 gene // 3 F2.2|3 // 109050 /// ENSM	6530418L21Rik	NM_175398	chr3	105490479	105523824	+	158.378	215.939	198.961	199.683	191.993	267.221	308.026	286.899	195.819	158.158	175.984	1.49433	1.49433	0.00524421	0.0367154
6872739	NM_001013770 // Lipo1 // lipase, member O1 // 19 C1|19 // 381236 /// ENSMUST00000112508	Lipo1	NM_001013770	chr19	33535134	34000243	-	223.053	196.02	222.293	275.703	227.52	152.088	164.015	157.939	205.199	228.749	216.654	0.694176	-1.44056	0.00524469	0.0367154
6911439	NM_001098227 // Sdcbp // syndecan binding protein // 4 A1|4 // 53378 /// NM_016807 // S	Sdcbp	NM_001098227	chr4	6292777	6335560	+	3342.47	3524.74	3281.41	3511.57	3413.41	2938.17	2596.95	2762.39	3343.4	3519.85	3430.49	0.809246	-1.23572	0.00525365	0.0367428
6846530	NM_146322 // Olfr187 // olfactory receptor 187 // 16 C2|16 // 258319 /// ENSMUST0000005	Olfr187	NM_146322	chr16	59035635	59039555	-	16.999	17.4418	18.3959	17.7008	17.6272	21.6135	32.3984	26.462	18.4852	20.2238	19.335	1.50121	1.50121	0.00528315	0.0367428
6970303	NM_146499 // Olfr484 // olfactory receptor 484 // 7 E3|7 // 258492 /// ENSMUST000000735	Olfr484	NM_146499	chr7	115252578	115274175	-	37.3605	41.525	40.6341	39.5085	39.726	46.7395	53.7529	50.1237	41.867	38.8952	40.3537	1.26173	1.26173	0.0053004	0.0367428
6913180	NM_028270 // Aldh1b1 // aldehyde dehydrogenase 1 family, member B1 // 4|4 B2 // 72535 /	Aldh1b1	NM_028270	chr4	45764723	45817471	+	320.264	286.363	345.227	281.675	307.306	382.109	461.837	420.086	295.466	283.898	289.625	1.367	1.367	0.00530591	0.0367428
6892153	NM_001001444 // Defb29 // defensin beta 29 // 2 H1|2 // 75400 /// ENSMUST00000060598 //	Defb29	NM_001001444	chr2	152333534	152365777	-	102.979	106.276	106.614	119.096	108.573	134.248	133.549	133.898	107.448	105.379	106.409	1.23325	1.23325	0.00530714	0.0367428
6748897	NM_177084 // Slc9a4 // solute carrier family 9 (sodium/hydrogen exchanger), member 4 //	Slc9a4	NM_177084	chr1	40636956	40687551	+	75.0354	83.0754	85.5342	68.7816	77.8195	99.7732	104.842	102.276	73.1228	76.3216	74.7048	1.31428	1.31428	0.00531138	0.0367428
6833382	NM_010664 // Krt18 // keratin 18 // 15 F3|15 58.86 cM // 16668 /// ENSMUST00000023803 /	Krt18	NM_010664	chr15	101858423	101862442	+	1253.81	1191.2	1104.52	1022.25	1139.51	781.076	923.68	849.388	1093.4	1153.34	1122.97	0.745369	-1.34162	0.00531174	0.0367428
6748620	NM_001172205 // Arid5a // AT rich interactive domain 5A (MRF1-like) // 1 B|1 // 214855	Arid5a	NM_001172205	chr1	36359349	36380874	+	550.39	550.363	579.317	573.055	563.128	651.003	708.095	678.949	586.635	561.382	573.87	1.20567	1.20567	0.00532031	0.0367428
6772810	NM_134005 // Enpp3 // ectonucleotide pyrophosphatase/phosphodiesterase 3 // 10 A4|10 //	Enpp3	NM_134005	chr10	24473505	24570230	-	552.052	521.716	507.534	541.381	530.39	425.036	432.945	428.972	492.138	561.359	525.61	0.808786	-1.23642	0.00532037	0.0367428
6831859	NM_013847 // Gcat // glycine C-acetyltransferase (2-amino-3-ketobutyrate-coenzyme A lig	Gcat	NM_013847	chr15	78861314	78872951	+	375.709	367.449	364.345	347.426	363.585	428.88	435.999	432.423	388.002	394.541	391.259	1.18934	1.18934	0.00532505	0.0367428
6844411	NM_177356 // Lamp3 // lysosomal-associated membrane protein 3 // 16 A3|16 // 239739 ///	Lamp3	NM_177356	chr16	19653403	19722227	-	40.3054	42.0266	42.0898	38.5821	40.7252	48.7436	56.8694	52.6499	36.6256	42.0152	39.2279	1.29281	1.29281	0.00532859	0.0367428
6939667	NM_010323 // Gnrhr // gonadotropin releasing hormone receptor // 5 E1|5 44.0 cM // 1471	Gnrhr	NM_010323	chr5	86609789	86626935	-	28.5803	33.0143	31.4036	30.6255	30.8644	39.81	37.0297	38.3948	32.7926	31.1452	31.9583	1.24398	1.24398	0.00532907	0.0367428
6943862	ENSMUST00000035813 // Ppp1r9a // protein phosphatase 1, regulatory (inhibitor) subunit	Ppp1r9a	ENSMUST00000035813	chr6	4845809	5115662	+	618.77	548.094	571.659	634.383	592.2	469.23	462.888	466.05	536.733	604.032	569.389	0.786978	-1.27068	0.00533387	0.0367428
6958897	NM_011927 // Ceacam9 // carcinoembryonic antigen-related cell adhesion molecule 9 // 7	Ceacam9	NM_011927	chr7	17307278	17311461	+	141.365	153.96	144.869	125.907	141.153	184.824	180.281	182.539	143.196	129.651	136.255	1.29318	1.29318	0.00533613	0.0367428
6972339	NR_015529 // R74862 // expressed sequence R74862 // 7 F5|7 // 97423 /// NR_015529 // R7	R74862	NR_015529	chr7	150207699	150239601	-	446.467	409.038	362.843	422.085	408.95	307.623	319.717	313.613	437.664	486.306	461.344	0.766875	-1.30399	0.00533714	0.0367428
6771723	NM_146862 // Olfr763 // olfactory receptor 763 // 10 D3|10 // 258861 /// ENSMUST0000007	Olfr763	NM_146862	chr10	128448343	128449272	+	43.9253	72.3063	93.0117	54.6125	63.3767	116.819	201.797	153.538	61.6714	72.6122	66.9184	2.42261	2.42261	0.00533999	0.0367428
6839340	NM_007575 // Ciita // class II transactivator // 16 A1|16 // 12265 /// NM_001243760 //	Ciita	NM_007575	chr16	10480149	10535128	+	118.339	124.62	149.491	116.006	126.459	169.29	172.733	171.003	131.844	123.354	127.528	1.35223	1.35223	0.00534318	0.0367428
6855037	ENSMUST00000015622 // Rnf5 // ring finger protein 5 // 17 B1|17 18.75 cM // 54197 /// N	Rnf5	ENSMUST00000015622	chr17	34738048	34741807	-	1019.79	1052.42	871.357	1126.4	1013.09	753.587	683.435	717.652	887.166	1083.59	980.47	0.708383	-1.41166	0.00534348	0.0367428
6782273	NM_016745 // Atp2a3 // ATPase, Ca++ transporting, ubiquitous // 11 B4|11 // 53313 /// N	Atp2a3	NM_016745	chr11	72773798	72810845	+	164.63	171.995	165.514	159.732	165.411	195.364	206.27	200.742	167.253	152.843	159.886	1.21361	1.21361	0.00534977	0.0367428
6924793	NM_177670 // Tmem69 // transmembrane protein 69 // 4 D1|4 // 230657 /// ENSMUST00000106	Tmem69	NM_177670	chr4	116224133	116230523	-	258.099	285.598	266.557	296.784	276.34	186.473	196.715	191.525	232.768	325.912	275.432	0.693079	-1.44284	0.00535661	0.0367428
6758958	ENSMUST00000161600 // Fam126b // family with sequence similarity 126, member B // 1 C1.	Fam126b	ENSMUST00000161600	chr1	58575029	58643157	-	697.631	696.877	587.437	759.744	682.498	493.248	527.636	510.151	665.346	700.14	682.521	0.747476	-1.33783	0.00535674	0.0367428
6867193	NM_177450 // Cndp1 // carnosine dipeptidase 1 (metallopeptidase M20 family) // 18 E4|18	Cndp1	NM_177450	chr18	84779901	84819476	-	84.321	84.9257	94.8167	81.1118	86.1465	103.776	114.112	108.822	85.8324	81.6267	83.7031	1.26322	1.26322	0.00535994	0.0367428
6963237	NM_028910 // Olfr701 // olfactory receptor 701 // 7 E3|7 // 66786 /// ENSMUST0000007541	Olfr701	NM_028910	chr7	113957653	113964223	+	52.6229	49.1647	48.7169	47.8926	49.5671	57.5387	65.0831	61.1945	47.2237	46.8657	47.0444	1.23458	1.23458	0.00536007	0.0367428
6812209	NM_148942 // Serpinb6c // serine (or cysteine) peptidase inhibitor, clade B, member 6c	Serpinb6c	NM_148942	chr13	33971690	33997577	-	34.3677	34.7659	34.9779	42.8755	36.587	53.2796	54.1504	53.7134	45.7563	33.9208	39.3966	1.4681	1.4681	0.00536935	0.0367428
6847710	NM_130857 // Krtap16-5 // keratin associated protein 16-5 // 16 C3.3|16 // 77918 /// EN	Krtap16-5	NM_130857	chr16	88877788	88878273	-	57.1951	48.8508	40.3968	44.9046	47.4478	73.5575	71.7258	72.6359	54.1834	41.5291	47.436	1.53085	1.53085	0.00537804	0.0367428
6935777	NM_013823 // Kl // klotho // 5|5 G3 // 16591 /// ENSMUST00000078856 // Kl // klotho //	Kl	NM_013823	chr5	151753714	151796879	+	74.9486	69.434	72.4342	68.0668	71.1711	83.9588	101.655	92.3846	63.3565	69.3157	66.2694	1.29806	1.29806	0.00538053	0.0367428
6973132	NM_146179 // Zfp418 // zinc finger protein 418 // 7 A1|7 // 232854 /// ENSMUST000000514	Zfp418	NM_146179	chr7	7124061	24226832	+	642.561	695.781	704.893	655.817	674.255	563.574	550.592	557.045	630.752	664.871	647.587	0.826166	-1.21041	0.00538233	0.0367428
6855166	NM_008208 // H2-T3 // histocompatibility 2, T region locus 3 // 17 B1|17 20.03 cM // 15	H2-T3	NM_008208	chr17	36319172	36343005	-	69.6441	64.3733	74.0963	59.8712	66.7807	85.4205	93.3514	89.2983	73.1193	83.3748	78.0789	1.33718	1.33718	0.00538317	0.0367428
6963823	NR_027879 // 4930583K01Rik // RIKEN cDNA 4930583K01 gene // 7 F1|7 // 67745 /// NR_0278	4930583K01Rik	NR_027879	chr7	125387421	125389065	+	107.41	120.393	131.158	118.856	119.156	147.045	158.335	152.585	125.181	129.938	127.538	1.28055	1.28055	0.00538922	0.0367512
6762796	NM_015811 // Rgs1 // regulator of G-protein signaling 1 // 1 F|1 78.0 cM // 50778 /// E	Rgs1	NM_015811	chr1	146060709	146118313	-	35.7111	41.3063	39.5008	40.9761	39.3088	48.1946	49.7523	48.9671	39.0814	41.1925	40.1231	1.24571	1.24571	0.00540399	0.0368191
6877584	NM_001164071 // Tank // TRAF family member-associated Nf-kappa B activator // 2 C1.3|2	Tank	NM_001164071	chr2	61394886	61492350	+	689.478	742.301	663.885	773.073	715.898	557.679	550.485	554.068	661.63	772.928	715.114	0.773947	-1.29208	0.00541499	0.0368473
6882272	NM_007788 // Csnk2a1 // casein kinase 2, alpha 1 polypeptide // 2 G3|2 // 12995 /// ENS	Csnk2a1	NM_007788	chr2	152052236	152107572	+	1222.91	1508.81	1279.98	1283.8	1319.61	1905.83	1636.96	1766.28	1555.11	1461.77	1507.77	1.33853	1.33853	0.00541777	0.0368473
6771693	NM_021882 // Pmel // premelanosome protein // 10 D3|10 70.0 cM // 20431 /// ENSMUST0000	Pmel	NM_021882	chr10	128141776	128157271	+	130.225	130.192	144.055	148.928	138.101	171.953	174.173	173.059	138.073	128.53	133.217	1.25314	1.25314	0.00542339	0.0368527
6756790	ENSMUST00000088658 // Mybl1 // myeloblastosis oncogene-like 1 // 1 A2|1 3.0 cM // 17864	Mybl1	ENSMUST00000088658	chr1	9635825	9690280	-	353.011	373.926	337.682	355.447	354.785	270.535	242.757	256.27	308.524	411.107	356.142	0.722326	-1.38442	0.00542821	0.0368527
6785307	NM_001012273 // Birc5 // baculoviral IAP repeat-containing 5 // 11|11 E2 // 11799 /// E	Birc5	NM_001012273	chr11	117710561	117717045	+	873.28	902.561	826.809	840.83	860.374	675.874	664.59	670.206	736.285	897.999	813.134	0.778976	-1.28374	0.00544637	0.0368664
6795889	NM_001081195 // Arid4a // AT rich interactive domain 4A (RBP1-like) // 12 C3|12 // 2382	Arid4a	NM_001081195	chr12	72106353	72199878	+	675.19	649.484	635.981	664.378	656.09	504.301	558.518	530.717	632.311	705.685	667.993	0.808909	-1.23623	0.00545093	0.0368664
6877924	ENSMUST00000074963 // Bbs5 // Bardet-Biedl syndrome 5 (human) // 2|2 C3 // 72569 /// NM	Bbs5	ENSMUST00000074963	chr2	69479889	69505626	+	358.334	346.051	314.148	397.585	352.776	256.769	279.821	268.047	321.708	335.077	328.325	0.759825	-1.31609	0.00545151	0.0368664
6956574	NM_027633 // 4931417G12Rik // RIKEN cDNA 4931417G12 gene // 6 E3|6 // 70979 /// ENSMUST	4931417G12Rik	NM_027633	chr6	113524553	113550709	-	79.6725	82.869	91.7687	78.2685	82.9839	101.027	106.761	103.855	81.0753	80.5856	80.8301	1.2515	1.2515	0.00545673	0.0368664
6803219	ENSMUST00000044159 // Serpina6 // serine (or cysteine) peptidase inhibitor, clade A, me	Serpina6	ENSMUST00000044159	chr12	104884840	104895402	-	38.0644	36.6642	40.0705	34.851	37.3638	44.4232	56.2968	50.0088	42.4334	41.0571	41.7395	1.33843	1.33843	0.00545803	0.0368664
6766491	NM_178934 // Slc2a12 // solute carrier family 2 (facilitated glucose transporter), memb	Slc2a12	NM_178934	chr10	22332674	22424884	+	608.558	608.777	657.36	586.29	614.709	738.626	838.298	786.886	643.234	563.855	602.238	1.2801	1.2801	0.00546454	0.0368664
6967022	NM_018795 // Abcc6 // ATP-binding cassette, sub-family C (CFTR/MRP), member 6 // 7 B3|7	Abcc6	NM_018795	chr7	53231122	53285716	-	204.681	204.008	213.974	202.188	206.163	243.018	245.888	244.449	205.364	196.117	200.688	1.18571	1.18571	0.00546763	0.0368664
6788073	---	---	---	chr11	50754223	50757257	-	96.6749	117.609	115.818	86.8311	103.408	143.815	151.46	147.588	103.443	102.061	102.75	1.42724	1.42724	0.00547634	0.0368664
6839737	NM_008223 // Serpind1 // serine (or cysteine) peptidase inhibitor, clade D, member 1 //	Serpind1	NM_008223	chr16	17331484	17343665	+	68.1683	83.0259	81.3957	84.8216	79.0635	103.165	104.155	103.659	84.0788	88.7466	86.3815	1.31108	1.31108	0.00548709	0.0368664
6831851	ENSMUST00000138880 // Nol12 // nucleolar protein 12 // 15 E1|15 // 97961 /// NM_133800	Nol12	ENSMUST00000138880	chr15	78765361	78774185	+	278.131	289.291	280.153	211.187	262.67	448.089	355.831	399.306	212.084	237.807	224.578	1.52017	1.52017	0.00548754	0.0368664
6766863	NM_025855 // Echdc1 // enoyl Coenzyme A hydratase domain containing 1 // 10 A4|10 22.0	Echdc1	NM_025855	chr10	29020929	29066469	+	628.431	659.958	551.807	657.438	622.806	510.678	421.518	463.961	660.846	634.238	647.403	0.744951	-1.34237	0.00548891	0.0368664
6876159	NM_011836 // Lamc3 // laminin gamma 3 // 2 B|2 // 23928 /// ENSMUST00000028187 // Lamc3	Lamc3	NM_011836	chr2	31742821	31802620	+	539.13	613.781	622.155	543.739	578.427	728.295	750.038	739.087	576.909	521.596	548.554	1.27775	1.27775	0.00549243	0.0368664
6949958	NM_009650 // Akap3 // A kinase (PRKA) anchor protein 3 // 6 F3|6 // 11642 /// ENSMUST00	Akap3	NM_009650	chr6	126802615	126824325	+	49.1602	56.828	61.7591	42.1862	51.9413	73.2893	83.7757	78.3575	53.3309	52.5694	52.9486	1.50858	1.50858	0.00549292	0.0368664
6854098	NM_008040 // Fpr-rs3 // formyl peptide receptor, related sequence 3 // 17 A3.2|17 // 14	Fpr-rs3	NM_008040	chr17	20760810	20761841	-	133.039	171.125	166.056	127.395	148.141	210.226	226.774	218.343	192.305	166.424	178.898	1.47389	1.47389	0.00550179	0.0368936
6794475	NM_207531 // Agr3 // anterior gradient 3 // 12 A3|12 // 403205 /// ENSMUST00000042101 /	Agr3	NM_207531	chr12	36627121	36676324	+	206.765	119.72	139.348	194.989	161.042	51.0451	74.8209	61.7998	163.767	75.8885	111.481	0.383751	-2.60586	0.00551366	0.0369255
6765281	ENSMUST00000073279 // Rcor3 // REST corepressor 3 // 1 H6|1 // 214742 /// NM_144814 //	Rcor3	ENSMUST00000073279	chr1	193910981	193962565	-	1446.55	1483	1447.05	1444.95	1455.3	1210.09	1238.6	1224.26	1348.56	1455.9	1401.15	0.841246	-1.18871	0.00551632	0.0369255
6900431	NM_025723 // 4921515J06Rik // RIKEN cDNA 4921515J06 gene // 3|3 G1 // 66715 /// ENSMUST	4921515J06Rik	NM_025723	chr3	108742977	108763681	+	78.5892	79.0564	71.2279	79.9131	77.1156	91.8438	104.108	97.7842	74.4645	81.7893	78.041	1.26802	1.26802	0.00552105	0.0369255
6993471	NM_177905 // Piwil4 // piwi-like homolog 4 (Drosophila) // 9 A2|9 // 330890 /// ENSMUST	Piwil4	NM_177905	chr9	14491103	14546206	-	52.1252	51.9777	58.8785	50.1303	53.1777	65.1011	80.215	72.2637	52.5009	46.0347	49.1616	1.35891	1.35891	0.00553297	0.036941
6929676	NM_021447 // Trim54 // tripartite motif-containing 54 // 5 B1|5 // 58522 /// ENSMUST000	Trim54	NM_021447	chr5	31419005	31440393	+	199.469	198.912	255.074	217.812	216.681	281.005	308.477	294.422	211.1	210.172	210.635	1.35877	1.35877	0.00553416	0.036941
6900044	NM_178777 // Nhlh2 // nescient helix loop helix 2 // 3 F2.2|3 // 18072 /// ENSMUST00000	Nhlh2	NM_178777	chr3	101740283	101819415	+	206.204	186.066	225.24	177.881	198.009	267.527	259.871	263.672	200.51	184.624	192.403	1.33161	1.33161	0.00553786	0.036941
6970107	NM_147045 // Olfr683 // olfactory receptor 683 // 7 E3|7 // 259047 /// ENSMUST000000612	Olfr683	NM_147045	chr7	112291864	112292823	-	32.0551	35.3513	30.8169	36.865	33.6842	56.4679	49.684	52.9673	30.2206	45.9703	37.2728	1.57247	1.57247	0.00554714	0.0369484
6882727	ENSMUST00000065039 // Bpi // bactericidal permeablility increasing protein // 2 H1|2 //	Bpi	ENSMUST00000065039	chr2	158068689	158125311	+	103.568	105.772	122.802	100.746	107.897	134.971	142.261	138.568	115.38	115.615	115.498	1.28427	1.28427	0.00554925	0.0369484
6892905	NM_011521 // Sdc4 // syndecan 4 // 2 H3|2 94.0 cM // 20971 /// ENSMUST00000017153 // Sd	Sdc4	NM_011521	chr2	164249755	164268664	-	1306.87	1305.96	1382.25	1300.36	1323.37	1586.25	1550.59	1568.32	1235.69	1263.75	1249.64	1.18503	1.18503	0.00555672	0.0369484
6896584	NR_027966 // 4930429B21Rik // RIKEN cDNA 4930429B21 gene // 3 A3|3 // 67576 /// NR_0279	4930429B21Rik	NR_027966	chr3	32259770	32278689	+	192.47	218.376	254.126	200.582	215.143	299.168	287.128	293.086	208.107	212.207	210.148	1.36228	1.36228	0.0055583	0.0369484
6947927	NM_144940 // Uroc1 // urocanase domain containing 1 // 6 D1|6 // 243537 /// ENSMUST0000	Uroc1	NM_144940	chr6	90283313	90314536	+	87.2286	93.113	107.654	93.1013	94.9871	122.451	128.952	125.66	98.4842	85.4501	91.7356	1.32291	1.32291	0.0055685	0.0369841
6803524	ENSMUST00000066060 // Bcl11b // B cell leukemia/lymphoma 11B // 12 F1|12 52.0 cM // 582	Bcl11b	ENSMUST00000066060	chr12	109148613	109242241	-	875.747	883.582	842.831	825.755	856.649	1092.49	1056.81	1074.46	1018.49	861.239	936.568	1.2543	1.2543	0.00557336	0.0369842
6766839	---	---	---					29.2254	34.6209	36.4006	28.4426	31.9922	47.2345	43.3816	45.2671	30.7209	25.9804	28.2514	1.41494	1.41494	0.00558659	0.0370398
6799064	ENSMUST00000071103 // Ddx1 // DEAD (Asp-Glu-Ala-Asp) box polypeptide 1 // 12 A1.1|12 //	Ddx1	ENSMUST00000071103	chr12	13225168	13256007	-	4266.39	4395.46	4200.66	4366.01	4306.5	3659.42	3250.85	3449.09	3796.36	4310.38	4045.21	0.800917	-1.24857	0.00559408	0.0370574
6972201	NR_033532 // B230206H07Rik // RIKEN cDNA B230206H07 gene // 7 F5|7 // 320871 /// NM_133	B230206H07Rik	NR_033532	chr7	148545050	148550999	-	75.3137	80.3764	83.5478	94.4232	83.129	113.308	111.026	112.161	84.0118	100.117	91.7115	1.34924	1.34924	0.00561226	0.0370793
6938798	AK083074 // C530043K16Rik // RIKEN cDNA C530043K16 gene // 5 C3.1|5 // 320715 /// AK083	C530043K16Rik	AK083074	chr5	66983721	66986792	-	269.657	279.019	299.965	291.56	284.813	374.855	374.372	374.614	304.929	242.145	271.73	1.31529	1.31529	0.00561339	0.0370793
6850502	NM_178589 // Tnfrsf21 // tumor necrosis factor receptor superfamily, member 21 // 17|17	Tnfrsf21	NM_178589	chr17	43153420	43226797	+	1183.3	1237.66	1260.95	1253.98	1233.64	1477.56	1444.65	1461.06	1206.91	1234.58	1220.62	1.18435	1.18435	0.00562179	0.0370793
6886180	NM_139051 // Nr5a1 // nuclear receptor subfamily 5, group A, member 1 // 2 B|2 23.5 cM	Nr5a1	NM_139051	chr2	38548147	38570179	-	143.198	145.061	147.022	124.893	139.751	172.18	182.545	177.287	137.118	128.085	132.524	1.2686	1.2686	0.00562766	0.0370793
6981870	NM_001040699 // Mtmr7 // myotubularin related protein 7 // 8|8 B1.2 // 54384 /// ENSMUS	Mtmr7	NM_001040699	chr8	41634293	41720143	-	263.208	265.427	249.868	240.293	254.491	214.141	201.682	207.818	215.749	232.418	223.929	0.816602	-1.22459	0.00563033	0.0370793
6972133	NM_146520 // Olfr536 // olfactory receptor 536 // 7 F4|7 // 258513 /// ENSMUST000001060	Olfr536	NM_146520	chr7	147686752	147693217	-	39.8277	39.0722	38.0014	42.7994	39.8863	52.8859	49.0615	50.938	39.9693	34.0665	36.9	1.27708	1.27708	0.00563102	0.0370793
6906987	NM_026394 // Lce1f // late cornified envelope 1F // 3 F1|3 // 67828 /// ENSMUST00000047	Lce1f	NM_026394	chr3	92522618	92524272	-	87.9255	75.1859	70.6893	82.3439	78.7605	99.0208	109.915	104.326	85.5111	79.7095	82.5594	1.32459	1.32459	0.00563948	0.0370793
6805825	NM_013674 // Irf4 // interferon regulatory factor 4 // 13|13 A3.3 // 16364 /// ENSMUST0	Irf4	NM_013674	chr13	30835358	30858844	+	82.969	70.9647	84.2141	76.2999	78.4271	98.106	103.14	100.591	82.0323	74.607	78.2316	1.28261	1.28261	0.00564198	0.0370793
6940872	NM_010278 // Gfi1 // growth factor independent 1 // 5 F|5 56.0 cM // 14581 /// NM_00126	Gfi1	NM_010278	chr5	108145694	108155802	-	138.489	161.52	180.962	148.955	156.701	208.452	212.112	210.274	164.67	157.097	160.839	1.34188	1.34188	0.00564278	0.0370793
6792418	NM_010350 // Grin2c // glutamate receptor, ionotropic, NMDA2C (epsilon 3) // 11 E2|11 7	Grin2c	NM_010350	chr11	115107755	115128557	-	184.966	186.138	204.662	181.749	189.173	237.044	224.565	230.72	171.347	172.949	172.146	1.21962	1.21962	0.0056459	0.0370793
6886022	NM_010406 // Hc // hemolytic complement // 2 cen-C1|2 23.5 cM // 15139 /// ENSMUST00000	Hc	NM_010406	chr2	34838851	34916950	-	43.1109	41.701	46.9128	44.1469	43.9268	51.4083	57.6505	54.4398	46.325	44.9572	45.636	1.23933	1.23933	0.00566344	0.0371358
6786044	NM_001163359 // Fignl1 // fidgetin-like 1 // 11|11 A2 // 60530 /// NM_021891 // Fignl1	Fignl1	NM_001163359	chr11	11676661	11709068	-	661.432	680.231	627.673	643.747	652.978	481.062	546.857	512.906	583.347	674.816	627.417	0.785489	-1.27309	0.00566591	0.0371358
6949593	NM_133661 // Slc6a12 // solute carrier family 6 (neurotransmitter transporter, betaine/	Slc6a12	NM_133661	chr6	121296656	121315790	+	91.9852	110.508	113.04	88.0927	100.305	132.073	145.66	138.7	104.244	102.548	103.393	1.38279	1.38279	0.00566907	0.0371358
6944750	NM_028920 // Hyal6 // hyaluronoglucosaminidase 6 // 6 A3.1|6 // 74409 /// ENSMUST000000	Hyal6	NM_028920	chr6	24683244	24696388	+	27.8387	25.4971	26.7514	24.0381	25.9924	35.6446	30.7842	33.1255	26.5776	26.3842	26.4807	1.27443	1.27443	0.00567793	0.037162
6850350	NM_146807 // Olfr136 // olfactory receptor 136 // 17 B1|17 // 258803 /// ENSMUST0000007	Olfr136	NM_146807	chr17	38466818	38473042	+	11.4706	8.73441	10.1416	8.51018	9.64312	18.703	13.0497	15.6227	10.1263	11.9527	11.0017	1.62009	1.62009	0.00569226	0.0372043
6871648	NM_146701 // Olfr1448 // olfactory receptor 1448 // 19 C1|19 // 258696 /// ENSMUST00000	Olfr1448	NM_146701	chr19	12993853	12994797	-	9.44565	14.0857	12.773	11.5199	11.8287	16.6793	27.051	21.2413	14.8105	13.5473	14.1648	1.79574	1.79574	0.00570018	0.0372043
6792832	NM_009854 // Cd7 // CD7 antigen // 11 E2|11 74.0 cM // 12516 /// ENSMUST00000026159 //	Cd7	NM_009854	chr11	120888334	120900732	-	109.041	126.281	135.729	115.797	121.289	191.048	155.998	172.635	144.382	119.673	131.448	1.42333	1.42333	0.00570266	0.0372043
6782326	NM_146708 // Olfr402 // olfactory receptor 402 // 11 B4|11 // 258703 /// ENSMUST0000007	Olfr402	NM_146708	chr11	73967775	73969605	+	20.5358	26.3725	18.5859	16.8878	20.3051	35.236	37.023	36.1183	28.0514	18.3524	22.6895	1.77879	1.77879	0.00570755	0.0372043
6878769	NM_146580 // Olfr1020 // olfactory receptor 1020 // 2 E1|2 // 258573 /// ENSMUST0000005	Olfr1020	NM_146580	chr2	85687285	85690564	+	123.606	87.8719	116.093	100.217	106.025	165.778	157.451	161.56	99.4142	126.474	112.131	1.5238	1.5238	0.00570873	0.0372043
6887522	NM_021022 // Abcb11 // ATP-binding cassette, sub-family B (MDR/TAP), member 11 // 2 C2|	Abcb11	NM_021022	chr2	69076346	69180660	-	64.8111	59.8546	60.2947	55.2174	59.948	75.908	77.1722	76.5378	65.4803	56.6318	60.8958	1.27673	1.27673	0.00574882	0.0373684
6990215	ENSMUST00000034761 // Narg2 // NMDA receptor-regulated gene 2 // 9 C|9 // 93697 /// NM_	Narg2	ENSMUST00000034761	chr9	69245731	69280994	+	858.997	907.196	833.767	914.424	877.953	729.473	657.046	692.313	856.15	986.811	919.159	0.788553	-1.26815	0.00575255	0.0373684
6883105	ENSMUST00000017867 // Wfdc2 // WAP four-disulfide core domain 2 // 2 H3|2 // 67701 ///	Wfdc2	ENSMUST00000017867	chr2	164387933	164393996	+	594.009	476.919	497.516	577.029	534.024	280.609	411.8	339.934	526.431	458.005	491.027	0.636552	-1.57096	0.0057594	0.0373684
6766586	NM_001010827 // Taar7b // trace amine-associated receptor 7B // 10 A4|10 // 209517 ///	Taar7b	NM_001010827	chr10	23719745	23720821	+	1004	601.058	595.134	503.595	652.132	1405.14	1225.88	1312.41	651.906	513.724	578.707	2.01255	2.01255	0.00575953	0.0373684
6852769	NM_009205 // Slc3a1 // solute carrier family 3, member 1 // 17 E4|17 51.0 cM // 20532 /	Slc3a1	NM_009205	chr17	85427701	85467243	+	161.492	151.749	142.791	150.726	151.545	129.183	116.585	122.722	136.275	141.71	138.966	0.80981	-1.23486	0.00577685	0.0373684
6918028	NM_025786 // Rnf186 // ring finger protein 186 // 4 D3|4 // 66825 /// ENSMUST0000011609	Rnf186	NM_025786	chr4	138523032	138524275	+	126.052	127.179	156.384	123.752	132.717	182.838	184.355	183.595	129.605	107.6	118.091	1.38335	1.38335	0.00577804	0.0373684
6817417	---	---	---	chr14	22666810	22688955	+	152.319	141.324	166.71	148.845	152.026	185.285	202.094	193.507	141.65	155.925	148.616	1.27286	1.27286	0.00577904	0.0373684
6985392	NM_025583 // Ctrb1 // chymotrypsinogen B1 // 8 E1|8 57.0 cM // 66473 /// ENSMUST0000003	Ctrb1	NM_025583	chr8	114210427	114214892	-	127.138	121.603	166.931	127.768	134.755	183.284	207.876	195.193	139.477	127.337	133.268	1.44851	1.44851	0.00578015	0.0373684
6950727	NM_020495 // Slco1b2 // solute carrier organic anion transporter family, member 1b2 //	Slco1b2	NM_020495	chr6	141578027	141635167	+	24.9034	24.5788	26.1411	24.4501	25.0096	29.2661	30.7603	30.0039	25.562	23.9383	24.7369	1.1997	1.1997	0.00578193	0.0373684
6944966	NM_008493 // Lep // leptin // 6 A3.3|6 10.5 cM // 16846 /// ENSMUST00000069789 // Lep /	Lep	NM_008493	chr6	28945487	29023877	+	49.7595	41.6057	48.0638	40.8394	44.8986	61.9271	56.8036	59.3099	43.3629	40.9426	42.1354	1.32098	1.32098	0.00578522	0.0373684
6893556	NM_021394 // Zbp1 // Z-DNA binding protein 1 // 2 H3|2 // 58203 /// ENSMUST00000029018	Zbp1	NM_021394	chr2	173031758	173044404	-	137.535	136.469	151.019	115.18	134.421	172.35	190.724	181.304	136.564	136.601	136.583	1.34879	1.34879	0.0057902	0.0373684
6785550	NM_001038699 // Fn3k // fructosamine 3 kinase // 11 E2|11 // 63828 /// ENSMUST000001030	Fn3k	NM_001038699	chr11	121296247	121311804	+	130.903	132.76	153.408	132.32	137.048	169.657	173.463	171.549	146.647	143.359	144.993	1.25175	1.25175	0.00579258	0.0373684
6941786	ENSMUST00000031398 // Hpd // 4-hydroxyphenylpyruvic acid dioxygenase // 5 F|5 67.0 cM /	Hpd	ENSMUST00000031398	chr5	123620948	123677843	-	80.594	89.2976	99.9781	84.5504	88.3164	110.771	123.322	116.879	85.194	93.7847	89.3862	1.32341	1.32341	0.0058168	0.0374282
6987352	NM_008319 // Icam5 // intercellular adhesion molecule 5, telencephalin // 9 A3|9 7.0 cM	Icam5	NM_008319	chr9	20836511	20843479	+	166.215	175.047	195.398	166.301	175.352	228.312	214.681	221.391	176.703	184.549	180.583	1.26256	1.26256	0.0058224	0.0374282
6838654	NR_003960 // Gm5478 // predicted pseudogene 5478 // 15 F2|15 // 432987 /// NR_003960 //	Gm5478	NR_003960	chr15	101470199	101477815	-	190.364	218.383	205.36	205.031	204.543	251.191	246.877	249.024	198.878	203.854	201.35	1.21747	1.21747	0.00582696	0.0374282
6984375	ENSMUST00000044602 // Ces1g // carboxylesterase 1G // 8 C5|8 43.0 cM // 12623 /// NM_02	Ces1g	ENSMUST00000044602	chr8	95826288	95861187	-	62.0118	56.94	63.4976	64.6752	61.7086	77.3045	74.8572	76.0708	69.0333	63.6968	66.3116	1.23274	1.23274	0.00582809	0.0374282
6868170	NM_019540 // Pfpl // pore forming protein-like // 19 A|19 // 56093 /// ENSMUST000001681	Pfpl	NM_019540	chr19	12502415	12506589	+	76.4376	89.2234	93.1962	81.1011	84.7329	120.044	111.444	115.664	91.4499	74.4062	82.489	1.36504	1.36504	0.00583271	0.0374282
6985341	NM_001190786 // Ddx19b // DEAD (Asp-Glu-Ala-Asp) box polypeptide 19b // 8 E1|8 // 23473	Ddx19b	NM_001190786	chr8	113527090	113528129	-	303.443	264.6	229.323	249.062	260.229	346.939	391.549	368.571	294.781	247.473	270.093	1.41633	1.41633	0.00584277	0.0374282
6786977	NM_176829 // 4931440F15Rik // RIKEN cDNA 4931440F15 gene // 11 A3.3|11 // 216622 /// EN	4931440F15Rik	NM_176829	chr11	29722405	29725658	-	124.99	134.44	149.81	102.676	126.796	198.201	176.253	186.905	129.294	135.132	132.181	1.47406	1.47406	0.0058431	0.0374282
6936730	ENSMUST00000115033 // Tmub1 // transmembrane and ubiquitin-like domain containing 1 //	Tmub1	ENSMUST00000115033	chr5	23951281	23953977	-	425.82	391.943	422.615	392.549	407.916	474.528	559.51	515.272	417.071	401.818	409.375	1.26317	1.26317	0.00584386	0.0374282
6888421	NM_146582 // Olfr1046 // olfactory receptor 1046 // 2 E1|2 // 258575 /// ENSMUST0000009	Olfr1046	NM_146582	chr2	86056915	86065961	-	23.9679	20.0061	22.5989	22.1555	22.1355	26.9748	32.3513	29.5409	25.0041	22.4279	23.6809	1.33455	1.33455	0.00584895	0.0374282
6837006	ENSMUST00000005860 // Pvalb // parvalbumin // 15 E|15 45.7 cM // 19293 /// ENSMUST00000	Pvalb	ENSMUST00000005860	chr15	78021550	78036821	-	91.8304	105.428	112.487	91.8514	100.007	126.001	138.61	132.155	88.3832	89.2537	88.8174	1.32146	1.32146	0.0058508	0.0374282
6793050	NR_015579 // 2810032G03Rik // RIKEN cDNA 2810032G03 gene // 12 A1.1|12 // 72669	2810032G03Rik	NR_015579	chr12	5382686	5423436	+	101.121	98.5067	85.6582	93.4472	94.4953	115.854	120.306	118.059	105.059	102.292	103.667	1.24936	1.24936	0.00586001	0.0374558
6747919	NM_009334 // Tfap2b // transcription factor AP-2 beta // 1|1 A2-A4 // 21419 /// ENSMUST	Tfap2b	NM_009334	chr1	19198995	19228906	+	2039.64	2127.73	1837.59	1938.6	1982.91	1578.57	1501.62	1539.66	1924.14	2267.05	2088.57	0.776442	-1.28793	0.00587706	0.0375058
6753792	ENSMUST00000074622 // Fam5c // family with sequence similarity 5, member C // 1 F-G1|1	Fam5c	ENSMUST00000074622	chr1	148341910	148749599	+	398.838	406.911	380.877	429.136	403.569	292.97	333.978	312.803	349.13	406.221	376.595	0.77509	-1.29017	0.00588711	0.0375058
6970090	NM_147060 // Olfr667 // olfactory receptor 667 // 7 E3|7 // 259062 /// ENSMUST000000713	Olfr667	NM_147060	chr7	112064828	112065808	-	138.959	157.095	236.743	174.926	173.399	283.548	296.083	289.749	220.678	236.067	228.242	1.671	1.671	0.00588746	0.0375058
6888621	ENSMUST00000099784 // Olfr1233 // olfactory receptor 1233 // 2 E1|2 // 258974 /// NM_14	Olfr1233	ENSMUST00000099784	chr2	89179540	89180492	-	42.8707	40.7775	42.0135	41.76	41.8487	74.9091	50.3818	61.4333	43.0267	40.3115	41.647	1.46799	1.46799	0.00589515	0.0375058
6783363	NM_198013 // Cuedc1 // CUE domain containing 1 // 11 C|11 // 103841 /// NM_001172099 //	Cuedc1	NM_198013	chr11	87911570	88003620	+	532.136	528.859	507.71	531.457	524.944	621.211	767.158	690.338	509.652	588.505	547.661	1.31508	1.31508	0.00590045	0.0375058
6789268	NM_009661 // Alox8 // arachidonate 8-lipoxygenase // 11|11 B4 // 11688 /// ENSMUST00000	Alox8	NM_009661	chr11	68997387	69011374	-	215.695	245.796	201.171	197.854	214.33	271.034	297.416	283.918	202.913	220.014	211.29	1.32469	1.32469	0.00590241	0.0375058
6929865	NM_019447 // Hgfac // hepatocyte growth factor activator // 5 B2|5 // 54426 /// ENSMUST	Hgfac	NM_019447	chr5	35384178	35391090	+	213.637	205.814	236.638	219.977	218.727	259.307	294.881	276.524	221.47	207.549	214.397	1.26423	1.26423	0.00591177	0.0375058
6790928	ENSMUST00000061469 // Wfikkn2 // WAP, follistatin/kazal, immunoglobulin, kunitz and net	Wfikkn2	ENSMUST00000061469	chr11	94097276	94107299	-	329.634	344.975	306.005	320.063	324.859	389.784	409.185	399.367	412.054	377.332	394.311	1.22935	1.22935	0.00591443	0.0375058
6760194	NM_007735 // Col4a4 // collagen, type IV, alpha 4 // 1 C5|1 // 12829 /// ENSMUST0000008	Col4a4	NM_007735	chr1	82438140	82584744	-	138.448	141.182	164.423	130.222	143.031	178.109	206.675	191.861	147.463	140.654	144.018	1.3414	1.3414	0.0059164	0.0375058
6787769	NM_010583 // Itk // IL2 inducible T cell kinase // 11 B1.1|11 22.0 cM // 16428 /// ENSM	Itk	NM_010583	chr11	46137526	46250320	-	79.0432	71.0794	82.2156	69.7495	75.3398	93.1407	107.57	100.095	86.5679	76.0808	81.1551	1.32858	1.32858	0.00592086	0.0375058
6969968	ENSMUST00000073394 // Dub2a // deubiquitinating enzyme 2a // 7 E3|7 // 384701 /// NM_00	Dub2a	ENSMUST00000073394	chr7	110397873	110458971	-	154.688	226.587	173.157	240.373	195.436	118.543	112.431	115.446	156.85	202.778	178.342	0.590714	-1.69287	0.0059229	0.0375058
7019669	NM_007957 // Esx1 // extraembryonic, spermatogenesis, homeobox 1 // X F1|X 57.0 cM // 1	Esx1	NM_007957	chrX	133649941	133692319	-	79.2479	80.2561	92.7509	77.525	82.235	100.639	120.447	110.098	87.6468	79.404	83.424	1.33883	1.33883	0.00592868	0.0375058
6845185	ENSMUST00000042042 // Osta // organic solute transporter alpha // 16 B3|16 // 106407 //	Osta	ENSMUST00000042042	chr16	32475622	32592224	-	126.595	136.16	140.845	122.247	131.253	167.549	160.439	163.955	138.873	127.517	133.074	1.24915	1.24915	0.00593161	0.0375058
6972742	NM_146914 // Olfr5 // olfactory receptor 5 // 7 A1|7 // 18349 /// ENSMUST00000086319 //	Olfr5	NM_146914	chr7	6432927	6433903	-	75.8118	60.3721	77.8826	85.0736	74.2084	102.375	115.069	108.537	74.4753	64.7505	69.4426	1.46259	1.46259	0.00596873	0.037594
6978336	NM_011332 // Ccl17 // chemokine (C-C motif) ligand 17 // 8 C5|8 45.0 cM // 20295 /// EN	Ccl17	NM_011332	chr8	97306581	97335923	+	106.876	107.299	107.257	95.8861	104.211	134.691	122.917	128.669	99.7766	96.5109	98.1298	1.2347	1.2347	0.00597345	0.037594
6764036	NR_027666 // Fcrla // Fc receptor-like A // 1 H3|1 // 98752 /// NM_001160215 // Fcrla /	Fcrla	NR_027666	chr1	172847725	172857714	-	69.176	83.5994	81.1281	80.4868	78.3907	95.1255	117.695	105.811	79.5588	80.2272	79.892	1.34978	1.34978	0.00598122	0.037594
6847680	NM_018778 // Cldn8 // claudin 8 // 16 C3.3|16 // 54420 /// ENSMUST00000049697 // Cldn8	Cldn8	NM_018778	chr16	88561071	88563453	-	1157.18	1286.02	1012.88	1300.81	1183.3	690.894	931.26	802.123	1043.06	1030.91	1036.93	0.677852	-1.47525	0.00598908	0.037594
6926896	ENSMUST00000047720 // Ptchd2 // patched domain containing 2 // 4 E2|4 // 242748 /// NM_	Ptchd2	ENSMUST00000047720	chr4	147613588	147742284	-	152.104	144.913	169.807	144.393	152.471	189.127	212.323	200.39	154.105	133.423	143.392	1.31428	1.31428	0.00600065	0.037594
6796580	NM_028821 // Dnalc1 // dynein, axonemal, light chain 1 // 12|12 D3 // 105000 /// ENSMUS	Dnalc1	NM_028821	chr12	85454992	85488428	+	484.647	541.024	471.826	605.965	523.258	400.759	372.441	386.341	552.45	603.496	577.409	0.738334	-1.3544	0.00600573	0.037594
6910275	NM_027617 // Spata1 // spermatogenesis associated 1 // 3 H2|3 // 70951 /// ENSMUST00000	Spata1	NM_027617	chr3	146120168	146158069	-	157.052	150.875	150.147	154.604	153.143	125.69	125.716	125.703	135.548	155.094	144.992	0.82082	-1.21829	0.00600874	0.037594
6875626	ENSMUST00000028363 // Il1f8 // interleukin 1 family, member 8 // 2 A3|2 10.3 cM // 6967	Il1f8	ENSMUST00000028363	chr2	24008681	24016039	+	16.279	13.9322	19.0314	19.5625	17.0466	32.1287	23	27.1839	23.0915	22.8553	22.9732	1.59468	1.59468	0.00600944	0.037594
6801631	NM_181752 // Gpr135 // G protein-coupled receptor 135 // 12 C3|12 // 238252 /// ENSMUST	Gpr135	NM_181752	chr12	73168973	73173032	-	299.639	251.278	273.393	286.289	277.069	360.356	336.504	348.226	293.68	292.777	293.228	1.25683	1.25683	0.00601239	0.037594
6881126	NR_045838 // A730036I17Rik // RIKEN cDNA A730036I17 gene // 2 F1|2 // 329513 /// NR_045	A730036I17Rik	NR_045838	chr2	129044705	129061330	+	78.8451	70.978	83.7153	63.4391	73.8354	108.692	101.709	105.143	97.6088	79.4861	88.0829	1.42401	1.42401	0.00603593	0.037594
6790012	NM_010708 // Lgals9 // lectin, galactose binding, soluble 9 // 11 B5|11 // 16859 /// EN	Lgals9	NM_010708	chr11	78776484	78798428	-	1099.86	1094.53	1152.7	1114.28	1115.13	753.712	959.328	850.325	936.737	869.017	902.242	0.762548	-1.31139	0.00603784	0.037594
6926202	NM_026419 // Cela3b // chymotrypsin-like elastase family, member 3B // 4 D3|4 82.0 cM /	Cela3b	NM_026419	chr4	136957484	136986562	-	80.0212	74.0742	122.529	102.769	92.9485	151.491	159.775	155.579	99.1362	100.908	100.018	1.67381	1.67381	0.00604197	0.037594
6987307	NM_146559 // Olfr868 // olfactory receptor 868 // 9 A2-A5|9 // 258552 /// ENSMUST000000	Olfr868	NM_146559	chr9	19903090	19906134	+	41.0563	34.66	33.946	33.6889	35.7168	44.7501	51.0175	47.7812	34.3698	38.4044	36.331	1.33778	1.33778	0.00604489	0.037594
6999673	NM_011731 // Slc6a20b // solute carrier family 6 (neurotransmitter transporter), member	Slc6a20b	NM_011731	chr9	123501930	123541663	-	88.6937	75.0895	83.2876	75.1963	80.3641	99.4425	110.497	104.824	95.2225	85.2962	90.1228	1.30436	1.30436	0.00604724	0.037594
6990390	NM_146224 // Zfp280d // zinc finger protein 280D // 9 D|9 // 235469 /// ENSMUST00000098	Zfp280d	NM_146224	chr9	72122235	72211568	+	1840.4	2072.85	1835.68	2136.45	1966.75	1545.65	1322.54	1429.7	1757.37	2162.67	1949.52	0.726974	-1.37557	0.00605067	0.037594
6871613	NM_146688 // Olfr262 // olfactory receptor 262 // 19 C1|19 // 258683 /// ENSMUST0000008	Olfr262	NM_146688	chr19	12315211	12322273	-	33.2446	34.1561	29.1344	30.7659	31.7627	55.4298	49.0058	52.1191	35.8915	21.7557	27.9435	1.64089	1.64089	0.00606216	0.037594
6858520	NM_026157 // Mtpap // mitochondrial poly(A) polymerase // 18 A1|18 // 67440 /// ENSMUST	Mtpap	NM_026157	chr18	4351082	4397316	+	2133.64	2196.36	1880.76	2213.02	2101.49	1727.18	1450.67	1582.84	1922.68	2141.64	2029.21	0.75321	-1.32765	0.00606288	0.037594
6872761	NM_024204 // Ankrd22 // ankyrin repeat domain 22 // 19 C1|19 24.0 cM // 52024 /// ENSMU	Ankrd22	NM_024204	chr19	34196625	34240533	-	178.324	168.747	136.977	151.894	158.183	205.138	255.949	229.139	146.029	169.412	157.286	1.44857	1.44857	0.00606551	0.037594
6781442	NM_010862 // Myo15 // myosin XV // 11 B2|11 33.9 cM // 17910 /// ENSMUST00000071880 //	Myo15	NM_010862	chr11	60282664	60341862	+	168.176	166.619	186.724	151.525	167.8	209.096	220.759	214.849	172.856	162.346	167.519	1.28038	1.28038	0.00606642	0.037594
6983953	NM_028007 // Itfg1 // integrin alpha FG-GAP repeat containing 1 // 8 C4|8 39.0 cM // 71	Itfg1	NM_028007	chr8	88241489	88364826	-	1615.65	1665.45	1631.41	1713.58	1656.01	1413.64	1179.04	1291.02	1591.42	1798.15	1691.63	0.779556	-1.28278	0.00607034	0.037594
6876357	BC021771 // D730039F16Rik // RIKEN cDNA D730039F16 gene // 2 B|2 // 77996 /// BC021771	D730039F16Rik	BC021771	chr2	34729684	34747653	+	81.7723	85.8937	79.5555	72.8507	79.876	100.206	97.5676	98.8782	74.5636	72.9416	73.7484	1.23789	1.23789	0.00607271	0.037594
6857834	NM_001163622 // Prepl // prolyl endopeptidase-like // 17 E4|17 // 213760 /// ENSMUST000	Prepl	NM_001163622	chr17	85461654	85489860	-	2039.5	2016.87	2017.85	2062.67	2034.14	1755.18	1729.33	1742.21	1996.42	2009.33	2002.8	0.856485	-1.16756	0.006073	0.037594
6947932	ENSMUST00000032174 // Klf15 // Kruppel-like factor 15 // 6 D1|6 // 66277 /// NM_023184	Klf15	ENSMUST00000032174	chr6	90412590	90425225	+	181.121	179.495	227.411	154.878	183.953	253.901	341.912	294.638	167.316	141.878	154.073	1.60171	1.60171	0.00608503	0.037594
6965427	NM_203490 // Mrgprd // MAS-related GPR, member D // 7 F5|7 // 211578 /// ENSMUST0000006	Mrgprd	NM_203490	chr7	152500750	152509959	+	113.427	106.938	127.004	109.557	113.979	164.81	150.766	157.631	77.8951	100.953	88.6777	1.38298	1.38298	0.00608779	0.037594
6933679	ENSMUST00000031492 // Rab35 // RAB35, member RAS oncogene family // 5 F|5 // 77407 ///	Rab35	ENSMUST00000031492	chr5	116081958	116097735	+	3298.97	3170.73	3319.38	3078.26	3215.22	2610.66	2718.89	2664.22	2889.29	3142.07	3013.03	0.828601	-1.20685	0.00609142	0.037594
6790288	NM_013653 // Ccl5 // chemokine (C-C motif) ligand 5 // 11 C|11 47.4 cM // 20304 /// ENS	Ccl5	NM_013653	chr11	83339285	83344020	-	41.3341	39.0749	43.4912	40.4316	41.0517	47.7007	58.8125	52.9658	46.192	46.182	46.1872	1.29022	1.29022	0.00609218	0.037594
6785294	NM_001195089 // Tmc8 // transmembrane channel-like gene family 8 // 11 E2|11 // 217356	Tmc8	NM_001195089	chr11	117643410	117654431	+	302.118	281.365	297.045	289.542	292.412	337.235	360.736	348.786	300.796	304.659	302.722	1.19279	1.19279	0.00609263	0.037594
6950259	NM_207025 // Tas2r123 // taste receptor, type 2, member 123 // 6 G1|6 63.5 cM // 353167	Tas2r123	NM_207025	chr6	132797160	132798161	+	41.7377	33.4272	51.0221	37.9832	40.5506	63.1622	62.4089	62.7842	40.3943	33.5095	36.7912	1.54831	1.54831	0.00609599	0.037594
6824867	NM_007800 // Ctsg // cathepsin G // 14 C3|14 20.5 cM // 13035 /// ENSMUST00000015583 //	Ctsg	NM_007800	chr14	56718722	56721411	-	82.381	99.4604	89.9861	70.6677	84.9605	124.453	123.555	124.003	85.8705	71.2654	78.2278	1.45954	1.45954	0.00609907	0.037594
6836954	NM_001024848 // Apol7b // apolipoprotein L 7b // 15 E1|15 // 278679 /// ENSMUST00000089	Apol7b	NM_001024848	chr15	77252649	77277880	-	380.512	447.946	342.557	398.131	390.471	502.068	547.547	524.315	421.623	448.735	434.966	1.34278	1.34278	0.00610232	0.037594
6946493	NM_134185 // Vmn1r9 // vomeronasal 1 receptor 9 // 6 B3|6 // 171203 /// ENSMUST00000171	Vmn1r9	NM_134185	chr6	57020936	57064354	+	38.9389	36.2862	34.1487	24.8842	33.1021	70.8212	72.6792	71.7442	23.4924	48.907	33.8962	2.16736	2.16736	0.00610233	0.037594
6855022	NM_010381 // H2-Ea-ps // histocompatibility 2, class II antigen E alpha, pseudogene //	H2-Ea-ps	NM_010381	chr17	34478902	34484492	-	36.6129	37.6141	34.9696	33.1894	35.5565	47.0757	41.8963	44.4105	34.1918	32.2228	33.1926	1.24901	1.24901	0.0061041	0.037594
6860102	NM_008989 // Pura // purine rich element binding protein A // 18|18 B3 // 19290 /// ENS	Pura	NM_008989	chr18	36425174	36446815	+	2458.22	2136.3	2429.09	2271.77	2320.15	3013.24	2785.07	2896.91	2257.64	2393.16	2324.49	1.24857	1.24857	0.00611126	0.037594
6871616	NM_146687 // Olfr1436 // olfactory receptor 1436 // 19 C1|19 // 258682 /// ENSMUST00000	Olfr1436	NM_146687	chr19	12372673	12396111	-	17.9452	17.331	12.7028	14.6422	15.5085	24.8036	21.3082	22.9896	13.9284	13.6187	13.7727	1.48239	1.48239	0.00611277	0.037594
6834729	NM_026153 // Ankrd33b // ankyrin repeat domain 33B // 15|15 B3.2 // 67434 /// ENSMUST00	Ankrd33b	NM_026153	chr15	31253710	31296820	-	269.1	290.709	355.1	292.848	300.325	403.278	408.542	405.903	285.342	262.397	273.63	1.35154	1.35154	0.00611901	0.0376021
6925361	NM_011902 // Tekt2 // tektin 2 // 4 D2.2|4 // 24084 /// ENSMUST00000102616 // Tekt2 //	Tekt2	NM_011902	chr4	125999367	126002953	-	691.325	602.986	564.606	605.385	614.385	424.462	495.548	458.631	542.602	617.297	578.743	0.746484	-1.33961	0.00613571	0.0376446
6955047	NM_144943 // Cd207 // CD207 antigen // 6|6 D1-D2 // 246278 /// ENSMUST00000037882 // Cd	Cd207	NM_144943	chr6	83621209	83651268	-	89.3732	118.379	124.003	98.3028	106.566	151.094	155.833	153.445	110.008	117.013	113.456	1.4399	1.4399	0.00613578	0.0376446
6896506	NM_029489 // Samd7 // sterile alpha motif domain containing 7 // 3 A3|3 // 75953 /// EN	Samd7	NM_029489	chr3	30598381	30688871	+	97.3649	105.045	104.172	109.381	103.901	122.164	129.237	125.65	97.3055	95.7022	96.5009	1.20933	1.20933	0.00614398	0.0376647
6878718	NM_008920 // Prg2 // proteoglycan 2, bone marrow // 2 D|2 50.0 cM // 19074 /// ENSMUST0	Prg2	NM_008920	chr2	84820615	84823789	+	97.7097	110.249	127.398	111.656	111.26	143.321	156.41	149.723	106.026	116.857	111.31	1.3457	1.3457	0.00616839	0.0377631
6979821	NM_023709 // Capn9 // calpain 9 // 8 E2|8 // 73647 /// ENSMUST00000093033 // Capn9 // c	Capn9	NM_023709	chr8	127099985	127149243	+	89.6536	89.2952	103.407	89.5561	92.7921	114.211	116.462	115.331	96.4775	93.5723	95.0141	1.2429	1.2429	0.00618357	0.0377631
6753295	ENSMUST00000121990 // Syt2 // synaptotagmin II // 1 E4|1 73.5 cM // 20980 /// NM_009307	Syt2	ENSMUST00000121990	chr1	136543209	136659150	+	189.581	176.482	213.79	176.82	188.584	246.6	239.224	242.883	195.246	181.039	188.009	1.28794	1.28794	0.00618664	0.0377631
6849362	NM_053259 // Prss28 // protease, serine, 28 // 17 A3.3|17 10.43 cM // 114661 /// ENSMUS	Prss28	NM_053259	chr17	25445611	25448801	+	91.006	85.5117	101.904	82.3108	89.8845	112.048	120.447	116.172	85.2749	86.3761	85.824	1.29245	1.29245	0.00618763	0.0377631
6896360	NM_177330 // Ghsr // growth hormone secretagogue receptor // 3 A3|3 // 208188 /// ENSMU	Ghsr	NM_177330	chr3	27244006	27276932	+	268.653	283.03	316.693	271.82	284.438	344.717	370.318	357.29	296.745	299.888	298.312	1.25613	1.25613	0.00618822	0.0377631
6856365	AK044372 // A930025A13Rik // RIKEN cDNA A930025A13 gene // 17 D|17 // 320580 /// AK0443	A930025A13Rik	AK044372	chr17	59028643	59030942	-	33.12	38.7657	43.9186	40.4369	38.8588	49.888	62.1753	55.694	42.1447	46.8293	44.4253	1.43323	1.43323	0.00618967	0.0377631
6985660	NM_029686 // Pkd1l2 // polycystic kidney disease 1 like 2 // 8|8 C5-D2 // 76645 /// ENS	Pkd1l2	NM_029686	chr8	119519381	119606349	-	104.594	106.493	124.429	106.666	110.266	134.501	146.52	140.382	102.793	105.816	104.293	1.27311	1.27311	0.0061982	0.037785
6923520	ENSMUST00000030303 // Cyp2j6 // cytochrome P450, family 2, subfamily j, polypeptide 6 /	Cyp2j6	ENSMUST00000030303	chr4	96182838	96220352	-	359.02	370.041	340.684	378.715	361.833	310.059	245.031	275.634	372.271	383.986	378.083	0.761771	-1.31273	0.00620619	0.0377911
7013881	ENSMUST00000113202 // Hnrnph2 // heterogeneous nuclear ribonucleoprotein H2 // X E3|X 5	Hnrnph2	ENSMUST00000113202	chrX	131135738	131141599	+	877.545	859.528	752.522	928.077	851.941	694.307	603.902	647.529	832.952	885.63	858.89	0.760065	-1.31568	0.00620908	0.0377911
6977048	---	---	---	chr8	73387026	73389327	+	133.948	140.127	177.935	138.368	146.618	195.54	208.876	202.098	130.151	135.632	132.863	1.37839	1.37839	0.00621711	0.0378098
6998486	NM_028562 // 1700080E11Rik // RIKEN cDNA 1700080E11 gene // 9 F1|9 // 73532 /// ENSMUST	1700080E11Rik	NM_028562	chr9	105045672	105047412	-	93.08	93.2156	115.161	92.3718	98.0163	122.414	148.911	135.014	109.265	109.052	109.158	1.37747	1.37747	0.00624129	0.0379099
6781322	ENSMUST00000020719 // 2310033P09Rik // RIKEN cDNA 2310033P09 gene // 11|11 B2 // 67862	2310033P09Rik	ENSMUST00000020719	chr11	59021843	59026689	+	1270.96	1281.48	1258.16	1319.61	1282.37	1076.92	1039.73	1058.13	1230.22	1390.8	1308.05	0.825177	-1.21186	0.00624349	0.0379099
6784330	ENSMUST00000036467 // Asb16 // ankyrin repeat and SOCS box-containing 16 // 11 D|11 //	Asb16	ENSMUST00000036467	chr11	102130137	102140766	+	190.271	225.253	241.658	238.729	222.991	289.071	302.051	295.489	236.289	245.761	240.978	1.32512	1.32512	0.00625416	0.0379446
6782278	NM_025818 // 1200014J11Rik // RIKEN cDNA 1200014J11 gene // 11 B4|11 // 66874 /// ENSMU	1200014J11Rik	NM_025818	chr11	72861402	72894100	+	1494.45	1519.84	1481.25	1517.94	1503.28	1305.06	1242.13	1273.16	1428.02	1506.31	1466.64	0.846951	-1.18071	0.00627015	0.0380115
7009941	NM_019634 // Tspan7 // tetraspanin 7 // X|X A1.3-A2 // 21912 /// ENSMUST00000076354 //	Tspan7	NM_019634	chrX	10062252	10237647	+	575.635	560.313	589.317	666.347	596.563	487.73	455.706	471.446	646.775	606.053	626.083	0.79027	-1.26539	0.00627691	0.0380223
6894272	ENSMUST00000016511 // Ptk6 // PTK6 protein tyrosine kinase 6 // 2 H4|2 110.0 cM // 2045	Ptk6	ENSMUST00000016511	chr2	180929749	180937494	-	134.642	138.435	146.27	119.054	134.224	181.262	165.639	173.275	128.907	137.155	132.967	1.29093	1.29093	0.00629278	0.0380502
6939677	NM_178730 // Tmprss11f // transmembrane protease, serine 11f // 5 E1|5 // 243083 /// EN	Tmprss11f	NM_178730	chr5	86950271	87061473	-	35.0616	29.1815	32.799	29.7371	31.6063	41.9896	39.4526	40.7015	34.406	31.5667	32.9558	1.28776	1.28776	0.00629517	0.0380502
6909303	NM_009102 // Rrh // retinal pigment epithelium derived rhodopsin homolog // 3 G3|3 67.0	Rrh	NM_009102	chr3	129507326	129525485	-	59.6301	54.1872	72.1096	61.9327	61.6338	81.7689	84.7147	83.2287	66.2198	61.4598	63.7954	1.35037	1.35037	0.00629645	0.0380502
6956981	ENSMUST00000004560 // Bid // BH3 interacting domain death agonist // 6 F1|6 54.0 cM //	Bid	ENSMUST00000004560	chr6	120841252	120867051	-	248.627	242.559	252.712	237.221	245.209	285.55	292.897	289.201	244.178	249.921	247.033	1.1794	1.1794	0.0063079	0.0380893
6890206	ENSMUST00000076084 // Ppp1r14d // protein phosphatase 1, regulatory (inhibitor) subunit	Ppp1r14d	ENSMUST00000076084	chr2	119043382	119060983	-	349.803	349.028	390.146	336.59	355.839	489.916	420.01	453.62	345.382	335.256	340.28	1.27479	1.27479	0.00632013	0.038101
6863934	ENSMUST00000153360 // Ino80c // INO80 complex subunit C // 18 A2|18 // 225280 /// NM_17	Ino80c	ENSMUST00000153360	chr18	24263263	24286288	-	952.021	975.4	935.096	954.168	954.063	822.539	720.138	769.64	801.206	894.632	846.631	0.806694	-1.23963	0.00632547	0.038101
6916092	NM_025590 // Acot11 // acyl-CoA thioesterase 11 // 4 C7|4 // 329910 /// ENSMUST00000102	Acot11	NM_025590	chr4	106406437	106425969	+	174.101	169.388	181.635	147.373	167.62	210.184	238.352	223.825	180.834	158.265	169.174	1.33531	1.33531	0.00632844	0.038101
6784034	NM_001007461 // Gsdma3 // gasdermin A3 // 11 D|11 57.0 cM // 450219 /// ENSMUST00000073	Gsdma3	NM_001007461	chr11	98487684	98499524	+	70.3623	68.461	77.4284	71.3994	71.8362	84.1126	94.897	89.3422	76.7231	73.1867	74.9341	1.24369	1.24369	0.00633037	0.038101
6996038	NM_175325 // Bbs4 // Bardet-Biedl syndrome 4 (human) // 9 B|9 33.0 cM // 102774 /// ENS	Bbs4	NM_175325	chr9	59162493	59201281	-	534.264	536.123	505.862	571.639	536.469	455.182	414.167	434.192	503.55	543.547	523.168	0.809351	-1.23556	0.00633476	0.038101
6889752	ENSMUST00000043970 // BC125332 // cDNA sequence BC125332 // 2 E3|2 // 213765 /// NM_172	BC125332	ENSMUST00000043970	chr2	112088105	112105724	-	68.0942	71.7203	92.8333	80.9837	77.8416	104.689	112.59	108.568	87.1138	87.7903	87.4514	1.39472	1.39472	0.00634121	0.0381098
6956497	ENSMUST00000165435 // Oxtr // oxytocin receptor // 6 E3|6 // 18430 /// NM_001081147 //	Oxtr	ENSMUST00000165435	chr6	112425883	112441001	-	296.811	282.763	258.095	254.299	272.432	362.076	327.459	344.333	269.821	262.421	266.095	1.26393	1.26393	0.00635857	0.0381505
6858633	BC049627 // 4921524L21Rik // RIKEN cDNA 4921524L21 gene // 18 A1|18 // 70901 /// ENSMUS	4921524L21Rik	BC049627	chr18	6565425	6686220	+	38.0707	36.2405	37.0204	34.5418	36.4455	42.063	47.956	44.913	39.4474	40.745	40.0908	1.23234	1.23234	0.00636001	0.0381505
6925429	ENSMUST00000053753 // Gja4 // gap junction protein, alpha 4 // 4 D2.2|4 57.6 cM // 1461	Gja4	ENSMUST00000053753	chr4	126974271	126991263	-	681.878	677.558	717.274	636.612	677.722	814.765	988.543	897.458	707.781	604.614	654.169	1.32422	1.32422	0.00637263	0.0381505
6900734	NM_001113478 // Frrs1 // ferric-chelate reductase 1 // 3 G1|3 // 20321 /// NM_009146 //	Frrs1	NM_001113478	chr3	116549883	116606648	+	821.382	802.574	705.45	777.123	775.348	615.447	642.432	628.792	796.053	792.87	794.46	0.810984	-1.23307	0.00637585	0.0381505
6820015	NM_010920 // Nkx2-6 // NK2 transcription factor related, locus 6 (Drosophila) // 14 D2|	Nkx2-6	NM_010920	chr14	69789859	69793587	+	124.609	128.764	159.923	123.334	133.378	175.676	185.949	180.74	124.982	130.624	127.772	1.35509	1.35509	0.00638545	0.0381505
6985340	NM_007916 // Ddx19a // DEAD (Asp-Glu-Ala-Asp) box polypeptide 19a // 8|8 D3 // 13680 //	Ddx19a	NM_007916	chr8	113497972	113521703	-	1856.67	1861.18	1821.11	1748.38	1821.23	1480.22	1547.37	1513.42	1658.89	1820.98	1737.99	0.830974	-1.20341	0.00639665	0.0381505
6806147	NM_138746 // Fam50b // family with sequence similarity 50, member B // 13 A3.3|13 // 10	Fam50b	NM_138746	chr13	34826719	34839487	+	101.105	87.9639	112.999	106.017	101.597	129.059	139.463	134.161	112.477	115.622	114.038	1.32051	1.32051	0.0064026	0.0381505
6989373	NM_001014398 // Trcg1 // taste receptor cell gene 1 // 9 B|9 // 541610 /// ENSMUST00000	Trcg1	NM_001014398	chr9	57036005	57097661	+	97.2826	85.9777	96.3812	93.8302	93.2589	109.155	133.967	120.926	88.5414	89.783	89.1597	1.29667	1.29667	0.0064028	0.0381505
6837935	NM_011994 // Abcd2 // ATP-binding cassette, sub-family D (ALD), member 2 // 15 E-F|15 /	Abcd2	NM_011994	chr15	90976106	91030084	-	219.686	234.225	224.863	240.573	229.694	192.796	187.591	190.176	212.591	231.011	221.61	0.827952	-1.2078	0.00640689	0.0381505
6830638	ENSMUST00000110178 // Wdr67 // WD repeat domain 67 // 15 D1|15 // 210544 /// NM_0010813	Wdr67	ENSMUST00000110178	chr15	57743254	57807490	+	871.955	892.037	818.756	892.365	868.246	719.076	729.978	724.504	831.274	881.979	856.251	0.834447	-1.1984	0.00640885	0.0381505
6776976	NM_172554 // Zdhhc17 // zinc finger, DHHC domain containing 17 // 10 D1|10 // 320150 //	Zdhhc17	NM_172554	chr10	110378838	110379395	-	181.259	249.805	187.619	241.229	212.765	144.494	145.85	145.171	231.12	243.759	237.355	0.682302	-1.46563	0.00641164	0.0381505
6919748	BC055848 // Fam92a // family with sequence similarity 92, member A // 4|4 A2 // 68099 /	Fam92a	BC055848	chr4	12027816	12110090	-	926.47	990.937	914.621	1015.03	960.838	799.647	638.317	714.44	925.032	1075.95	997.643	0.743563	-1.34488	0.00641432	0.0381505
6941857	ENSMUST00000031354 // Abcb9 // ATP-binding cassette, sub-family B (MDR/TAP), member 9 /	Abcb9	ENSMUST00000031354	chr5	124511542	124545897	-	214.505	213.028	226.755	197.151	212.597	255.931	267.227	261.519	212.379	196.802	204.442	1.23011	1.23011	0.00641536	0.0381505
6953749	NR_033635 // 9130019P16Rik // RIKEN cDNA 9130019P16 gene // 6 B3|6 // 100042056	9130019P16Rik	NR_033635	chr6	54219685	54426251	-	122.88	137.913	130.016	128.649	129.754	160.367	158.659	159.511	141.699	126.124	133.686	1.22933	1.22933	0.00642136	0.0381505
6941103	NR_045832 // E130006D01Rik // RIKEN cDNA E130006D01 gene // 5 F|5 // 269683 /// NR_0458	E130006D01Rik	NR_045832	chr5	112163323	112190735	-	51.4365	54.9691	56.2262	60.1157	55.6003	66.3254	84.0689	74.6717	59.4131	54.6546	56.9842	1.34301	1.34301	0.00642284	0.0381505
6855268	NM_146327 // Olfr129 // olfactory receptor 129 // 17 B1|17 // 258324 /// ENSMUST0000012	Olfr129	NM_146327	chr17	38151136	38196709	-	8.67877	9.72953	9.24748	7.70198	8.80632	11.2316	17.8807	14.1714	9.36936	9.80386	9.58415	1.60923	1.60923	0.00643269	0.0381793
6773933	NM_011282 // Ros1 // Ros1 proto-oncogene // 10 B3|10 28.0 cM // 19886 /// ENSMUST000000	Ros1	NM_011282	chr10	51765304	51915170	-	45.884	44.829	50.3022	42.37	45.7579	55.1539	59.4378	57.2558	43.7588	45.5153	44.6284	1.25128	1.25128	0.00645209	0.0382648
6802185	NM_020330 // Adam21 // a disintegrin and metallopeptidase domain 21 // 12 D1|12 28.0 cM	Adam21	NM_020330	chr12	82659571	82669461	-	111.807	114.701	112.761	103.624	110.641	134.894	136.895	135.89	124.074	109.996	116.824	1.22822	1.22822	0.006468	0.0382769
6989054	NM_011136 // Pou2af1 // POU domain, class 2, associating factor 1 // 9 A5.3|9 // 18985	Pou2af1	NM_011136	chr9	51009387	51048659	+	152.039	139.328	162.805	139.175	148.015	176.975	222.577	198.47	146.965	145.989	146.477	1.34088	1.34088	0.00647472	0.0382769
6989870	NM_183316 // Snapc5 // small nuclear RNA activating complex, polypeptide 5 // 9|9 D //	Snapc5	NM_183316	chr9	64027076	64030927	+	331.818	405.936	350.444	371.022	363.784	288.54	282.019	285.261	386.02	414.486	400.001	0.784149	-1.27527	0.00648325	0.0382769
6935583	ENSMUST00000085591 // Pdx1 // pancreatic and duodenal homeobox 1 // 5 G3|5 82.0 cM // 1	Pdx1	ENSMUST00000085591	chr5	148081545	148107087	+	141.844	155.093	172.785	163.686	157.935	193.872	218.961	206.034	173.757	158.217	165.805	1.30455	1.30455	0.00648962	0.0382769
6873309	ENSMUST00000145391 // Pdzd7 // PDZ domain containing 7 // 19 C3|19 // 100503041 /// NM_	Pdzd7	ENSMUST00000145391	chr19	45101396	45121498	-	250.739	238.053	270.784	239.357	249.397	295.084	326.824	310.55	233.835	247.473	240.558	1.2452	1.2452	0.00649117	0.0382769
6788594	NM_207527 // 4930504O13Rik // RIKEN cDNA 4930504O13 gene // 11 B1.3|11 // 403200 /// EN	4930504O13Rik	NM_207527	chr11	58259582	58271961	-	119.648	136.887	147.726	106.091	126.576	172.09	186.636	179.215	120.598	120.08	120.338	1.41587	1.41587	0.00649649	0.0382769
6819015	NM_053111 // Ear6 // eosinophil-associated, ribonuclease A family, member 6 // 14 C2|14	Ear6	NM_053111	chr14	52473443	52474318	+	41.784	43.6515	33.5277	42.7283	40.2052	55.8874	53.3028	54.5796	48.378	44.975	46.6453	1.35753	1.35753	0.0064986	0.0382769
6844210	ENSMUST00000161861 // Fgd4 // FYVE, RhoGEF and PH domain containing 4 // 16 A3|16 // 22	Fgd4	ENSMUST00000161861	chr16	16417003	16600634	-	133.703	135.932	129.491	136.306	133.83	115.192	112.743	113.96	134.569	137.722	136.136	0.851533	-1.17435	0.00650005	0.0382769
6935210	NM_013702 // Uncx // UNC homeobox // 5 G2|5 82.0 cM // 22255 /// ENSMUST00000031523 //	Uncx	NM_013702	chr5	140019458	140079243	+	251.808	262.292	280.948	249.212	260.773	304.376	357.017	329.647	279.218	269.548	274.34	1.26412	1.26412	0.00650142	0.0382769
6791407	NM_201255 // Krt9 // keratin 9 // 11 D|11 // 107656 /// ENSMUST00000059707 // Krt9 // k	Krt9	NM_201255	chr11	100031617	100057478	-	60.0903	64.5431	66.6134	55.6026	61.5642	88.6747	73.9819	80.9955	66.917	65.0479	65.9756	1.31563	1.31563	0.00650421	0.0382769
6997211	NM_009945 // Cox7a2 // cytochrome c oxidase, subunit VIIa 2 // 9 E1|9 42.0 cM // 12866	Cox7a2	NM_009945	chr9	79602689	79607665	-	507.217	453.208	445.975	567.313	491.085	349.786	376.694	362.991	590.208	664.668	626.33	0.739162	-1.35288	0.00652777	0.0382821
6992452	NM_028312 // Ccdc12 // coiled-coil domain containing 12 // 9|9 F2 // 72654 /// ENSMUST0	Ccdc12	NM_028312	chr9	110559007	110614089	+	165.788	203.523	161.643	148.388	168.668	223.11	271.273	246.016	195.564	170.04	182.356	1.45858	1.45858	0.00652993	0.0382821
6848102	---	---	---					108.486	116.454	127.341	98.4002	112.169	151.933	146.493	149.188	105.107	96.0271	100.465	1.33003	1.33003	0.00653355	0.0382821
6888591	NM_146897 // Olfr1214 // olfactory receptor 1214 // 2 E1|2 // 258899 /// ENSMUST0000009	Olfr1214	NM_146897	chr2	88827422	88828357	-	13.7189	17.9019	13.4642	15.1545	14.9618	19.6351	21.8654	20.7203	15.7504	16.3853	16.0647	1.38487	1.38487	0.0065376	0.0382821
7019821	NM_031381 // Tex13 // testis expressed gene 13 // X F1|X // 83555 /// ENSMUST0000004417	Tex13	NM_031381	chrX	137342847	137368771	-	72.3525	75.6685	90.435	69.0122	76.4556	103.471	123.28	112.941	79.4288	61.606	69.9523	1.47723	1.47723	0.00653802	0.0382821
6751655	NM_016702 // Agxt // alanine-glyoxylate aminotransferase // 1 D|1 59.0 cM // 11611 ///	Agxt	NM_016702	chr1	95031777	95041991	+	80.2945	78.525	95.5742	78.6765	82.9793	103.662	110.539	107.045	79.4359	78.0307	78.7305	1.29003	1.29003	0.00654071	0.0382821
6760232	NM_030556 // Slc19a3 // solute carrier family 19, member 3 // 1 C5|1 51.0 cM // 80721 /	Slc19a3	NM_030556	chr1	83001155	83083196	-	64.7456	65.3457	68.4301	72.4086	67.6651	82.9373	82.9638	82.9506	72.7225	65.7086	69.1266	1.22589	1.22589	0.00654443	0.0382821
6965942	NM_028219 // Cnfn // cornifelin // 7 A3|7 // 72383 /// ENSMUST00000167591 // Cnfn // co	Cnfn	NM_028219	chr7	26151873	26154743	-	231.111	222.592	269.582	220.137	235.061	299.865	301.65	300.756	238.847	239.495	239.171	1.27949	1.27949	0.00655823	0.0382821
6993468	ENSMUST00000058796 // Kdm4d // lysine (K)-specific demethylase 4D // 9 A1|9 // 244694 /	Kdm4d	ENSMUST00000058796	chr9	14254579	14304984	-	104.058	114.184	109.358	113.955	110.31	128.166	157.805	142.216	112.378	106.165	109.227	1.28923	1.28923	0.0065586	0.0382821
6784765	NM_015732 // Axin2 // axin2 // 11 E1|11 70.0 cM // 12006 /// ENSMUST00000052915 // Axin	Axin2	NM_015732	chr11	108779155	108812097	+	1037.58	1056.96	953.52	1068.97	1028.27	1210.93	1278.56	1244.28	1033.63	1033.34	1033.48	1.21012	1.21012	0.00656011	0.0382821
6795455	NM_146034 // Ctage5 // CTAGE family, member 5 // 12 C1|12 23.0 cM // 217615 /// NM_0011	Ctage5	NM_146034	chr12	60230743	60291199	+	1130.31	1140.3	1083.36	1179.61	1132.9	986.278	885.145	934.344	1056.59	1090.67	1073.5	0.824754	-1.21248	0.00656017	0.0382821
6961944	NM_008589 // Mesp2 // mesoderm posterior 2 // 7 D3|7 39.0 cM // 17293 /// ENSMUST000001	Mesp2	NM_008589	chr7	86955677	86966419	+	178.559	199.079	217.56	191.792	196.247	236.107	279.542	256.908	195.617	196.224	195.921	1.3091	1.3091	0.00656825	0.0382948
6938698	ENSMUST00000031092 // Rfc1 // replication factor C (activator 1) 1 // 5 C|5 39.0 cM //	Rfc1	ENSMUST00000031092	chr5	65653091	65726889	-	1432.98	1566.36	1409.82	1550.7	1488.35	1253.89	1192.69	1222.91	1462.48	1534.23	1497.87	0.821652	-1.21706	0.00657238	0.0382948
6978802	NM_198672 // Ces3a // carboxylesterase 3A // 8 D3|8 // 382053 /// ENSMUST00000093222 //	Ces3a	NM_198672	chr8	107572530	107582292	+	54.8435	72.4167	62.3337	68.1074	64.0795	83.9472	88.4034	86.1465	62.4011	62.3678	62.3843	1.34437	1.34437	0.0065858	0.0382996
6755315	NM_146761 // Olfr414 // olfactory receptor 414 // 1 H4|1 // 258756 /// ENSMUST000000531	Olfr414	NM_146761	chr1	176360513	176361670	+	47.9431	63.0297	57.5734	50.3737	54.4092	70.5268	96.5296	82.5102	51.3357	58.4386	54.7721	1.51647	1.51647	0.00658793	0.0382996
6768572	NM_177794 // Tmem26 // transmembrane protein 26 // 10 B5.3|10 // 327766 /// ENSMUST0000	Tmem26	NM_177794	chr10	68186414	68245398	+	4381.47	4366.62	4092.59	4109.94	4235.45	4944.13	5316.64	5127	3986.2	4298.45	4139.38	1.2105	1.2105	0.00658823	0.0382996
6813768	NM_019539 // Cts7 // cathepsin 7 // 13 B2|13 // 56092 /// ENSMUST00000021892 // Cts7 //	Cts7	NM_019539	chr13	61447769	61459547	-	45.8471	45.3858	43.5316	47.8136	45.6192	55.4948	54.367	54.928	49.3412	45.3267	47.2912	1.20406	1.20406	0.00659711	0.0383221
6809586	---	---	---	chr13	102167635	102234105	+	31.4084	32.435	35.9082	32.232	32.9524	41.2039	48.1138	44.5249	43.1806	34.5693	38.6359	1.3512	1.3512	0.00660674	0.0383229
6783850	NM_008266 // Hoxb1 // homeobox B1 // 11 D|11 56.08 cM // 15407 /// ENSMUST00000019117 /	Hoxb1	NM_008266	chr11	96220740	96253425	+	249.228	309.57	339.206	265.263	288.651	386.161	425.832	405.512	294.763	291.874	293.316	1.40485	1.40485	0.00660728	0.0383229
6808237	NM_182839 // Tppp // tubulin polymerization promoting protein // 13 C1|13 // 72948 ///	Tppp	NM_182839	chr13	74146875	74173201	+	228.562	195.172	275.176	226.951	229.742	317.698	333.668	325.585	248.417	218.496	232.976	1.41717	1.41717	0.00663222	0.0384255
6904320	NM_021782 // Il21 // interleukin 21 // 3 B|3 // 60505 /// ENSMUST00000029273 // Il21 //	Il21	NM_021782	chr3	37102812	37131978	-	74.7712	62.4691	72.5021	67.1586	69.0577	87.7009	86.5145	87.1054	65.2158	69.6813	67.4118	1.26134	1.26134	0.00663502	0.0384255
6871283	NM_201411 // Flrt1 // fibronectin leucine rich transmembrane protein 1 // 19 A|19 // 39	Flrt1	NM_201411	chr19	7168057	7240505	-	597.962	666.647	651.125	619.856	633.328	776.86	764.954	770.884	725.776	664.157	694.283	1.21719	1.21719	0.00664666	0.0384495
6979912	NM_145608 // BC021891 // cDNA sequence BC021891 // 8 E2|8 // 234878 /// ENSMUST00000034	BC021891	NM_145608	chr8	128434353	128471330	+	161.012	156.762	176.97	153.88	161.918	193.203	216.264	204.408	164.712	150.306	157.344	1.26242	1.26242	0.00665185	0.0384495
6864326	---	---	---					111.64	96.8789	129.671	119.808	113.853	163.438	151.849	157.537	125.161	109.438	117.036	1.38369	1.38369	0.00665426	0.0384495
6942839	ENSMUST00000099400 // Papolb // poly (A) polymerase beta (testis specific) // 5 G2|5 //	Papolb	ENSMUST00000099400	chr5	143001812	143006593	-	54.4179	64.6192	63.9229	64.4148	61.6859	75.4511	84.639	79.9131	56.8642	61.7578	59.2605	1.29548	1.29548	0.00667652	0.0385329
6870489	NM_001168491 // Pdcd4 // programmed cell death 4 // 19 D2|19 20.0 cM // 18569 /// ENSMU	Pdcd4	NM_001168491	chr19	53977748	54004273	+	4841.71	5244.17	4526.25	5496.13	5013.14	4015.04	3392.42	3690.5	4607.28	5424.97	4999.26	0.736177	-1.35837	0.00667876	0.0385329
6983604	NM_133823 // Mmaa // methylmalonic aciduria (cobalamin deficiency) type A // 8 C2|8 //	Mmaa	NM_133823	chr8	81787496	81818979	-	308.178	343.449	223.015	311.61	292.854	208.55	153.182	178.734	290.678	301.622	296.1	0.610318	-1.63849	0.00670338	0.0386174
6833417	NM_144547 // Amhr2 // anti-Mullerian hormone type 2 receptor // 15 F3|15 57.4 cM // 110	Amhr2	NM_144547	chr15	102275818	102285052	+	132.45	124.442	142.251	129.361	131.968	153.985	176.056	164.651	124.347	123.13	123.737	1.24766	1.24766	0.00670351	0.0386174
6754909	NM_033652 // Lmx1a // LIM homeobox transcription factor 1 alpha // 1 H2.3|1 88.2 cM //	Lmx1a	NM_033652	chr1	169579767	169778872	+	159.694	167.224	181.19	174.339	170.423	200.275	216.291	208.13	148.962	153.431	151.18	1.22125	1.22125	0.00671912	0.0386736
6871771	NM_198019 // Cep78 // centrosomal protein 78 // 19 A|19 // 208518 /// ENSMUST0000004770	Cep78	NM_198019	chr19	16029907	16059491	-	1275.9	1279.71	1166.69	1254.94	1243.42	1045.44	1036.78	1041.11	1223.84	1271.31	1247.39	0.837276	-1.19435	0.00672511	0.0386736
6878761	NM_146572 // Olfr1009 // olfactory receptor 1009 // 2 E1|2 // 258565 /// ENSMUST0000005	Olfr1009	NM_146572	chr2	85561564	85562508	+	69.2307	64.1012	73.5656	61.0136	66.8062	81.9436	118.914	98.7131	83.1797	79.5417	81.3404	1.4776	1.4776	0.00673197	0.0386736
6966571	---	---	---					158.856	170.054	139.779	143.1	152.465	206.103	190.098	197.939	154.959	168.525	161.6	1.29826	1.29826	0.00673351	0.0386736
6917770	NR_015613 // 1700029M20Rik // RIKEN cDNA 1700029M20 gene // 4 D3|4 // 73937 /// NR_0279	1700029M20Rik	NR_015613	chr4	135182580	135186113	+	125.675	118.053	153.761	100.503	123.052	181.83	196.082	188.822	151.987	126.446	138.629	1.53449	1.53449	0.00674854	0.0387309
6925549	ENSMUST00000106061 // S100pbp // S100P binding protein // 4|4 D2.3 // 74648 /// ENSMUST	S100pbp	ENSMUST00000106061	chr4	128825257	128866951	-	1414.92	1555.97	1555.43	1568.21	1522.26	1273.43	1126.55	1197.74	1442.94	1661.07	1548.12	0.786803	-1.27097	0.0067613	0.0387481
6782109	ENSMUST00000094055 // Slc16a11 // solute carrier family 16 (monocarboxylic acid transpo	Slc16a11	ENSMUST00000094055	chr11	70027432	70029915	+	198.395	204.681	214.767	201.952	204.859	234.88	281.527	257.147	200.927	193.785	197.324	1.25524	1.25524	0.00676168	0.0387481
6795260	NM_020287 // Insm2 // insulinoma-associated 2 // 12 C1|12 // 56856 /// ENSMUST000000518	Insm2	NM_020287	chr12	56700460	56701941	+	223.153	257.306	291.548	233.283	249.984	328.988	339.381	334.145	237.078	228.334	232.665	1.33666	1.33666	0.00678243	0.0388194
6918900	NM_011612 // Tnfrsf9 // tumor necrosis factor receptor superfamily, member 9 // 4 E2|4	Tnfrsf9	NM_011612	chr4	150288724	150320208	+	157.031	148.713	172.957	165.13	160.704	204.461	194.549	199.444	162.656	150.272	156.342	1.24106	1.24106	0.00678806	0.0388194
6959612	NM_026961 // 2200002J24Rik // RIKEN cDNA 2200002J24 gene // 7 B1|7 // 69147 /// ENSMUST	2200002J24Rik	NM_026961	chr7	31483955	31485551	+	80.6499	82.9972	74.9387	70.2911	77.0578	98.9063	103.867	101.356	74.3922	90.4093	82.0107	1.31532	1.31532	0.00679294	0.0388194
6780744	NM_146472 // Olfr1384 // olfactory receptor 1384 // 11 B1|11 // 258464 /// ENSMUST00000	Olfr1384	NM_146472	chr11	49327142	49328158	+	18.8219	19.2828	29.8142	37.8434	25.2966	46.7547	110.794	71.9728	52.0999	41.0361	46.2381	2.84517	2.84517	0.00680098	0.0388194
6855719	NM_010321 // Gnmt // glycine N-methyltransferase // 17 C|17 10.0 cM // 14711 /// ENSMUS	Gnmt	NM_010321	chr17	46862615	46867029	-	123.012	141.414	143.859	116.121	130.564	162.494	189.051	175.271	133.335	128.454	130.872	1.34241	1.34241	0.00681376	0.0388194
6974601	NM_026459 // Ccdc70 // coiled-coil domain containing 70 // 8|8 A3 // 67929 /// ENSMUST0	Ccdc70	NM_026459	chr8	23080077	23084513	+	35.248	32.9202	37.8528	32.0871	34.4552	44.4179	49.6166	46.9453	29.2288	37.1889	32.9695	1.3625	1.3625	0.00684631	0.0388194
6823717	NM_001033668 // Dnahc1 // dynein, axonemal, heavy chain 1 // 14 B|14 8.3 cM // 110084 /	Dnahc1	NM_001033668	chr14	32099083	32137082	-	81.1056	84.462	88.2081	83.4679	84.2725	108.167	124.701	116.14	96.7976	72.2097	83.6046	1.37815	1.37815	0.00684666	0.0388194
6831527	NM_028216 // Psca // prostate stem cell antigen // 15 D3|15 // 72373 /// ENSMUST0000002	Psca	NM_028216	chr15	74545285	74547495	+	108.456	117.346	109.271	110.668	111.381	133.003	150.79	141.618	95.5776	112.452	103.672	1.27147	1.27147	0.0068477	0.0388194
6818497	NM_027094 // Dydc1 // DPY30 domain containing 1 // 14 C1|14 // 69496 /// ENSMUST0000002	Dydc1	NM_027094	chr14	41886105	41912626	+	71.9763	80.6566	90.1778	81.564	80.8362	101.869	109.201	105.472	86.3402	77.2466	81.6669	1.30475	1.30475	0.00684853	0.0388194
6869984	ENSMUST00000026236 // Tlx1 // T cell leukemia, homeobox 1 // 19 C3|19 43.0 cM // 21908	Tlx1	ENSMUST00000026236	chr19	45224406	45231432	+	231.215	252.586	285.808	211.217	243.673	321.256	344.536	332.694	248.014	243.151	245.572	1.36533	1.36533	0.00684965	0.0388194
7019706	NM_026469 // Tex13a // testis expressed 13A // X F1|X // 67944 /// ENSMUST00000096314 /	Tex13a	NM_026469	chrX	134740905	134744108	-	81.1956	71.2353	82.9063	75.6003	77.5949	110.405	92.0592	100.816	78.5794	83.1924	80.853	1.29925	1.29925	0.00685164	0.0388194
6995504	NM_133217 // Bco2 // beta-carotene oxygenase 2 // 9|9 B // 170752 /// ENSMUST0000011910	Bco2	NM_133217	chr9	50341192	50363266	-	50.7087	48.2558	47.5904	46.3414	48.1983	55.7218	59.3119	57.4888	49.3066	49.2325	49.2697	1.19276	1.19276	0.00685843	0.0388194
6970166	NR_003967 // Gm4759 // GTPase, very large interferon inducible 1 pseudogene // 7 E3|7 /	Gm4759	NR_003967	chr7	113564715	113584587	-	32.6287	28.6668	32.1218	30.4308	30.9224	36.711	40.6248	38.6182	34.3124	31.4961	32.8741	1.24888	1.24888	0.0068587	0.0388194
6899385	---	---	---					71.7278	82.5153	86.706	72.3018	78.0469	100.912	99.1616	100.034	76.1509	73.9158	75.025	1.28171	1.28171	0.00687011	0.0388194
6799852	NM_028002 // Dus4l // dihydrouridine synthase 4-like (S. cerevisiae) // 12 A3|12 // 719	Dus4l	NM_028002	chr12	32324920	32339691	-	467.869	436.991	412.511	500.22	453.208	309.825	374.998	340.856	453.447	485.747	469.317	0.752098	-1.32961	0.00687423	0.0388194
6873153	NM_177603 // Frat2 // frequently rearranged in advanced T cell lymphomas 2 // 19 C3|19	Frat2	NM_177603	chr19	41920462	41922612	-	270.769	232.23	267.364	233.346	250.268	304.771	336.952	320.458	206.698	217.58	212.069	1.28046	1.28046	0.00687638	0.0388194
6970155	NM_025301 // Mrpl17 // mitochondrial ribosomal protein L17 // 7|7 F1 // 27397 /// ENSMU	Mrpl17	NM_025301	chr7	112956636	112959593	-	1401.06	1335.26	1318.33	1411.78	1365.96	1115.83	1075.36	1095.37	1210.76	1435.66	1318.43	0.801903	-1.24703	0.00687936	0.0388194
7009834	NM_172479 // Slc38a5 // solute carrier family 38, member 5 // X A1.1|X // 209837 /// EN	Slc38a5	NM_172479	chrX	7838363	7857305	+	117.375	132.184	120.03	113.542	120.587	146.396	159.888	152.993	127.307	112.543	119.698	1.26874	1.26874	0.00688257	0.0388194
6790664	ENSMUST00000107894 // Dgke // diacylglycerol kinase, epsilon // 11 C|11 // 56077 /// NM	Dgke	ENSMUST00000107894	chr11	88885743	88928154	-	229.274	266.762	212.129	276.737	244.786	169.229	176.518	172.835	226.818	184.242	204.424	0.706065	-1.4163	0.00688524	0.0388194
6896804	NM_019393 // Exosc9 // exosome component 9 // 3 B|3 // 50911 /// ENSMUST00000029269 //	Exosc9	NM_019393	chr3	36451538	36465184	+	1026.13	1128.66	1033.2	1155.42	1084.34	859.551	744.052	799.719	996.599	1264.19	1122.42	0.737505	-1.35592	0.00688796	0.0388194
6913044	NM_001002787 // Ccin // calicin // 4 B1|4 // 442829 /// ENSMUST00000095107 // Ccin // c	Ccin	NM_001002787	chr4	43996467	43998405	+	74.9881	67.3768	97.1532	66.6642	75.6333	110.984	113.148	112.061	74.2187	77.7354	75.9564	1.48163	1.48163	0.00689176	0.0388194
7018993	NM_018818 // Chm // choroidermia // X E1|X // 12662 /// ENSMUST00000026607 // Chm // ch	Chm	NM_018818	chrX	110154202	110299157	-	694.957	676.042	638.552	715.913	680.764	576.717	438.678	502.984	676.872	743.629	709.466	0.738852	-1.35345	0.00689478	0.0388194
6941897	ENSMUST00000031334 // Eif2b1 // eukaryotic translation initiation factor 2B, subunit 1	Eif2b1	ENSMUST00000031334	chr5	125019675	125029223	-	860.959	925.513	819.614	895.382	874.473	714.777	694.615	704.624	807.003	920.338	861.806	0.805772	-1.24105	0.00689835	0.0388194
6885835	ENSMUST00000057407 // Qrfp // pyroglutamylated RFamide peptide // 2 B|2 // 227717 /// N	Qrfp	ENSMUST00000057407	chr2	31661688	31666080	-	185.299	169.472	217.568	168.751	184.269	238.759	255.026	246.757	163.901	164.359	164.131	1.33912	1.33912	0.00691101	0.0388194
6921561	ENSMUST00000029987 // Aldob // aldolase B, fructose-bisphosphate // 4 B1|4 22.3 cM // 2	Aldob	ENSMUST00000029987	chr4	49548871	49595382	-	84.6448	83.8408	97.6847	74.4237	84.7517	109.379	114.077	111.703	83.7774	82.4347	83.1037	1.318	1.318	0.00691561	0.0388194
6969765	NM_016720 // Neu3 // neuraminidase 3 // 7 F1|7 // 50877 /// ENSMUST00000036331 // Neu3	Neu3	NM_016720	chr7	106959669	106976927	-	267.709	276.158	285.645	280.876	277.517	330.059	337.684	333.851	302.747	271.506	286.7	1.20299	1.20299	0.00692058	0.0388194
6784829	NM_011943 // Map2k6 // mitogen-activated protein kinase kinase 6 // 11|11 E1 // 26399 /	Map2k6	NM_011943	chr11	110196835	110399808	+	914.83	928.591	877.752	948.471	917.046	790.581	692.461	739.897	838.839	926.277	881.471	0.806828	-1.23942	0.00692444	0.0388194
6876062	NM_138748 // Ppp2r4 // protein phosphatase 2A, regulatory subunit B (PR 53) // 2 B // 1	Ppp2r4	NM_138748	chr2	30271570	30303323	+	1352.58	1342.68	1278.38	1330.45	1325.66	1129.37	1090.9	1109.97	1279.71	1401.93	1339.43	0.837262	-1.19437	0.00692859	0.0388194
6957506	NM_207020 // Tas2r115 // taste receptor, type 2, member 115 // 6 G1|6 63.4 cM // 353325	Tas2r115	NM_207020	chr6	132687072	132688004	-	32.3979	33.2947	33.4237	27.4863	31.5511	41.5032	51.6351	46.2929	31.3756	41.4072	36.0441	1.46723	1.46723	0.00694286	0.0388194
6787469	NM_013552 // Hmmr // hyaluronan mediated motility receptor (RHAMM) // 11 A5|11 19.0 cM	Hmmr	NM_013552	chr11	40514898	40546968	-	692.49	935.083	701.714	795.176	775.305	557.404	470.575	512.153	706.243	913.556	803.236	0.660583	-1.51381	0.00694355	0.0388194
6784238	NM_010475 // Hsd17b1 // hydroxysteroid (17-beta) dehydrogenase 1 // 11 D|11 60.25 cM //	Hsd17b1	NM_010475	chr11	100939715	100942801	+	145.895	168.187	157.643	149.369	155.039	182.068	215.481	198.07	148.1	153.375	150.715	1.27755	1.27755	0.00694418	0.0388194
6785409	AK038227 // Gm9734 // predicted gene 9734 // 11 E2|11 // 76377 /// AK081626 // 2810410L	Gm9734	AK038227	chr11	120046657	120047990	+	165.513	152.772	159.374	134.179	152.491	192.04	195.931	193.975	168.661	166.494	167.575	1.27205	1.27205	0.00694756	0.0388194
6970305	NM_146496 // Olfr486 // olfactory receptor 486 // 7 E3|7 // 258489 /// ENSMUST000000720	Olfr486	NM_146496	chr7	115315312	115323015	-	7.33735	9.12149	8.47163	7.50598	8.07689	10.2966	11.1271	10.7038	8.64976	9.63236	9.12782	1.32523	1.32523	0.00695286	0.0388194
6828034	AK016500 // 4931432E15Rik // RIKEN cDNA 4931432E15 gene // 14|14 // 70991 /// AK016500	4931432E15Rik	AK016500	chr14	124728368	124730203	-	59.6731	44.6782	54.3147	53.9552	52.8697	68.4135	74.9756	71.6195	51.6516	49.1497	50.3853	1.35464	1.35464	0.0069564	0.0388194
6963062	NM_146325 // Olfr554 // olfactory receptor 554 // 7 E3|7 // 258322 /// ENSMUST000000982	Olfr554	NM_146325	chr7	109788707	109789715	+	110.827	132.393	174.898	115.081	131.091	216.824	217.885	217.354	176.129	134.234	153.761	1.65803	1.65803	0.00695957	0.0388194
6985008	ENSMUST00000081998 // Dpep2 // dipeptidase 2 // 8 D3|8 // 319446 /// NM_176913 // Dpep2	Dpep2	ENSMUST00000081998	chr8	108508850	108529848	-	78.0491	91.2353	89.9817	79.5246	84.4883	110.364	105.232	107.768	88.103	79.4591	83.6695	1.27553	1.27553	0.00696076	0.0388194
6911719	NM_001039556 // Rad54b // RAD54 homolog B (S. cerevisiae) // 4 A1|4 // 623474 /// ENSMU	Rad54b	NM_001039556	chr4	11486089	11556232	+	726.203	756.156	644.533	767.972	722.048	532.715	512.693	522.61	625.914	826.78	719.37	0.723787	-1.38162	0.00696202	0.0388194
6888398	NM_146568 // Olfr1012 // olfactory receptor 1012 // 2 E1|2 // 258561 /// ENSMUST0000009	Olfr1012	NM_146568	chr2	85599596	85600531	-	65.1499	55.8695	60.0582	49.3726	57.3173	77.4686	85.5544	81.4109	69.3109	55.3826	61.9563	1.42036	1.42036	0.00697719	0.0388757
6844249	NM_001252444 // Ppil2 // peptidylprolyl isomerase (cyclophilin)-like 2 // 16 A3|16 // 6	Ppil2	NM_001252444	chr16	17086657	17111325	-	2270.35	2130.83	2155.04	2303.64	2213.79	1809.66	1889.12	1848.96	2131.86	2271.93	2200.78	0.835218	-1.19729	0.00698367	0.0388835
6959326	ENSMUST00000108336 // Zfp60 // zinc finger protein 60 // 7 A3|7 12.3 cM // 22718 /// EN	Zfp60	ENSMUST00000108336	chr7	28538266	28538721	+	551.654	595.959	481.476	534.272	539.269	386.183	423.492	404.406	528.896	630.446	577.441	0.749918	-1.33348	0.00700063	0.0388939
6996432	ENSMUST00000034934 // Aph1b // anterior pharynx defective 1b homolog (C. elegans) // 9|	Aph1b	ENSMUST00000034934	chr9	66623029	66643367	-	583.63	574.288	610.543	582.991	587.71	683.672	705.636	694.567	622.72	588.778	605.511	1.18182	1.18182	0.00700127	0.0388939
6953098	NM_022413 // Trpv6 // transient receptor potential cation channel, subfamily V, member	Trpv6	NM_022413	chr6	41570623	41591540	-	152.305	151.049	163.424	143.15	152.312	177.731	203.158	190.019	158.776	150.969	154.823	1.24757	1.24757	0.00700568	0.0388939
6831867	NM_145139 // Eif3l // eukaryotic translation initiation factor 3, subunit L // 15 E1|15	Eif3l	NM_145139	chr15	78905569	78931449	+	2732.3	2858.42	2843.79	2920.5	2837.88	2322.08	2430.94	2375.97	2720.77	2955.12	2835.52	0.837189	-1.19447	0.00700589	0.0388939
6769448	NM_001024918 // Rfx4 // regulatory factor X, 4 (influences HLA class II expression) //	Rfx4	NM_001024918	chr10	84218805	84378742	+	97.6488	99.7179	106.828	92.8648	99.1389	116.443	130.156	123.109	95.8369	90.9644	93.3689	1.24178	1.24178	0.00702278	0.0389271
6780725	NM_001110148 // Mgat1 // mannoside acetylglucosaminyltransferase 1 // 11 B1.2|11 28.5 c	Mgat1	NM_001110148	chr11	49057368	49076513	+	486.056	501.609	479.571	472.3	484.764	572.023	574.726	573.373	524.522	489.295	506.602	1.18279	1.18279	0.00702949	0.0389271
6758663	ENSMUST00000027264 // Asnsd1 // asparagine synthetase domain containing 1 // 1|1 C1 //	Asnsd1	ENSMUST00000027264	chr1	53382361	53409576	-	1783.26	1941.69	1797.65	2298.7	1944.93	1401.45	1329.99	1365.2	1847.3	2362.99	2089.29	0.701967	-1.42457	0.0070297	0.0389271
6993475	NM_019683 // Ankrd49 // ankyrin repeat domain 49 // 9|9 A3 // 56503 /// ENSMUST00000034	Ankrd49	NM_019683	chr9	14584077	14589134	-	1442.94	1494.04	1337.29	1566.03	1457.62	1170.74	1084.56	1126.87	1370.61	1632.31	1495.69	0.773032	-1.29361	0.00703446	0.0389271
6768931	NM_029661 // 1700027D21Rik // RIKEN cDNA 1700027D21 gene // 10 C1|10 // 76573 /// ENSMU	1700027D21Rik	NM_029661	chr10	76025017	76032968	+	95.8954	105.069	113.955	100.529	103.651	125.029	135.132	129.982	97.5588	92.1262	94.8036	1.25404	1.25404	0.00704431	0.0389271
6955480	NM_173775 // Ccdc37 // coiled-coil domain containing 37 // 6 D1|6 // 243538 /// ENSMUST	Ccdc37	NM_173775	chr6	90353483	90395879	-	105.944	102.625	128.959	106.445	110.529	152.901	139.216	145.898	113.691	106.234	109.899	1.32	1.32	0.00704999	0.0389271
6978945	ENSMUST00000034388 // Vps4a // vacuolar protein sorting 4a (yeast) // 8|8 D // 116733 /	Vps4a	ENSMUST00000034388	chr8	109555110	109569656	+	2645.64	2636.67	2608.67	2500.33	2597.13	2186.34	2222.55	2204.45	2382.9	2509.18	2445.31	0.848758	-1.17819	0.00705074	0.0389271
6941649	NM_145226 // Oas3 // 2'-5' oligoadenylate synthetase 3 // 5 F|5 67.1 cM // 246727 /// E	Oas3	NM_145226	chr5	121203117	121290055	-	134.596	141.298	157.876	140.684	143.361	190.396	169.622	179.709	136.311	139.105	137.701	1.25354	1.25354	0.00706601	0.0389271
6782102	NM_145137 // Mgl2 // macrophage galactose N-acetyl-galactosamine specific lectin 2 // 1	Mgl2	NM_145137	chr11	69943879	69951052	+	45.0114	40.0564	40.0611	39.5227	41.1047	55.9726	48.367	52.031	46.7337	43.7639	45.2244	1.26582	1.26582	0.00706674	0.0389271
6871645	NR_024093 // U05342 // sequence U05342 // 19 A|19 // 664779 /// NM_053009 // Zfp91 // z	U05342	NR_024093	chr19	12823862	12871312	-	1363.22	1361.9	1305.78	1357.75	1346.97	1097.72	1162.89	1129.84	1253.72	1361.71	1306.6	0.838815	-1.19216	0.00706692	0.0389271
6809436	---	---	---					345.035	335.135	305.981	336.119	330.231	395.307	402.362	398.819	358.346	340.5	349.309	1.2077	1.2077	0.00706789	0.0389271
6942753	NM_175362 // Card11 // caspase recruitment domain family, member 11 // 5 G2|5 // 108723	Card11	NM_175362	chr5	141348953	141476540	-	137.722	146.832	154.102	132.359	142.51	183.293	170.317	176.686	145.42	139.164	142.257	1.23982	1.23982	0.00708096	0.0389456
6940783	ENSMUST00000086795 // Barhl2 // BarH-like 2 (Drosophila) // 5 E5|5 // 104382 /// NM_001	Barhl2	ENSMUST00000086795	chr5	106831053	106887460	-	135.346	148.6	169.442	136.526	146.867	183.773	202.634	192.974	144.814	147.148	145.976	1.31393	1.31393	0.00708144	0.0389456
6806038	NM_011452 // Serpinb9b // serine (or cysteine) peptidase inhibitor, clade B, member 9b	Serpinb9b	NM_011452	chr13	33118506	33132446	+	80.9517	78.8632	89.5698	74.9814	80.9198	102.869	107.787	105.299	73.925	88.3826	80.8312	1.30128	1.30128	0.00709565	0.0389909
6882995	ENSMUST00000018012 // Sgk2 // serum/glucocorticoid regulated kinase 2 // 2|2 H3 // 2721	Sgk2	ENSMUST00000018012	chr2	162813086	162841360	+	92.2777	88.0859	113.555	90.2879	95.5458	122.071	134.185	127.985	94.9292	94.7635	94.8463	1.33952	1.33952	0.00709987	0.0389909
6838716	NM_013566 // Itgb7 // integrin beta 7 // 15 F3|15 61.1 cM // 16421 /// ENSMUST000000013	Itgb7	NM_013566	chr15	102043765	102062366	-	251.614	248.057	268.262	251.824	254.821	295.28	320.647	307.702	267.204	248.274	257.566	1.20752	1.20752	0.00711725	0.0390089
6824878	NM_010371 // Gzmc // granzyme C // 14 C3|14 20.5 cM // 14940 /// ENSMUST00000015585 //	Gzmc	NM_010371	chr14	56824094	56853504	-	28.5809	33.7894	33.7473	29.7045	31.3675	38.5145	41.0921	39.7824	33.3118	33.7845	33.5474	1.26827	1.26827	0.00711738	0.0390089
6818104	NM_178791 // E130203B14Rik // RIKEN cDNA E130203B14 gene // 14 B|14 // 320736 /// ENSMU	E130203B14Rik	NM_178791	chr14	33669942	33752675	+	1295.15	1236.97	1343.98	1385.6	1314.23	1646.52	1561.48	1603.38	1414.33	1292.9	1352.3	1.22004	1.22004	0.00711847	0.0390089
6958982	NM_031255 // Rsph6a // radial spoke head 6 homolog A (Chlamydomonas) // 7 A2|7 // 83434	Rsph6a	NM_031255	chr7	19640012	19659796	+	227.036	211.916	275.285	217.015	231.544	320.063	299.884	309.81	227.414	220.629	223.996	1.33802	1.33802	0.00712919	0.0390173
6947906	NM_053229 // Vmn1r46 // vomeronasal 1 receptor 46 // 6 D1|6 // 113856 /// ENSMUST000000	Vmn1r46	NM_053229	chr6	89926165	89927094	+	35.5289	39.4953	48.4243	43.4291	41.4468	56.4675	65.834	60.9709	45.6477	57.5056	51.2347	1.47106	1.47106	0.00714222	0.0390173
6888496	NM_146593 // Olfr1111 // olfactory receptor 1111 // 2 E1|2 // 258586 /// ENSMUST0000009	Olfr1111	NM_146593	chr2	86989851	87002699	-	36.0971	54.5531	51.5082	43.767	45.9015	74.2017	67.6079	70.8281	48.3995	56.3241	52.2117	1.54304	1.54304	0.00714749	0.0390173
6881787	NM_019771 // Dstn // destrin // 2 H1|2 81.4 cM // 56431 /// ENSMUST00000103172 // Dstn	Dstn	NM_019771	chr2	143736347	143769044	+	5853.16	6324.34	5938.16	6546.92	6159.08	5180.59	4621.03	4892.65	5770.58	6515.68	6131.82	0.794393	-1.25882	0.00714764	0.0390173
6930346	ENSMUST00000076939 // C1qtnf7 // C1q and tumor necrosis factor related protein 7 // 5 B	C1qtnf7	ENSMUST00000076939	chr5	43906807	44010677	+	566.193	561.219	583.792	568.041	569.748	643.658	739.118	689.736	541.749	548.702	545.214	1.2106	1.2106	0.00715787	0.0390173
6882454	NM_001025574 // Bpifb9b // BPI fold containing family B, member 9B // 2 H1|2 // 433492	Bpifb9b	NM_001025574	chr2	154132917	154146380	+	39.8117	43.3119	32.9711	28.351	35.6312	51.0468	61.2115	55.8986	35.9049	39.4193	37.6211	1.56881	1.56881	0.0071618	0.0390173
6855056	ENSMUST00000025223 // Cyp21a1 // cytochrome P450, family 21, subfamily a, polypeptide 1	Cyp21a1	ENSMUST00000025223	chr17	34938313	34941574	-	82.2697	91.9871	101.16	80.04	88.4751	113.786	121.856	117.752	96.4153	86.6279	91.3904	1.3309	1.3309	0.00716459	0.0390173
6965109	NM_146960 // Olfr53 // olfactory receptor 53 // 7 F4|7 // 258962 /// ENSMUST00000084455	Olfr53	NM_146960	chr7	147832381	147838818	+	30.949	34.6485	40.0125	38.9429	35.9532	58.0012	46.9639	52.1914	45.3525	37.1464	41.0449	1.45165	1.45165	0.00717199	0.0390173
6755091	ENSMUST00000027984 // Sh2d1b1 // SH2 domain protein 1B1 // 1|1 H2 // 26904 /// NM_01200	Sh2d1b1	ENSMUST00000027984	chr1	172162900	172220030	+	42.9299	34.2272	41.3857	44.6618	40.5956	57.1424	59.1215	58.1235	43.6049	33.5539	38.2509	1.43177	1.43177	0.00717332	0.0390173
6806831	NM_146042 // Rnf144b // ring finger protein 144B // 13 A5|13 // 218215 /// ENSMUST00000	Rnf144b	NM_146042	chr13	47218045	47345215	+	1085.99	994.929	1163.21	1104.21	1085.39	1371.46	1435.96	1403.29	1204.65	996.751	1095.75	1.29295	1.29295	0.00717834	0.0390173
6885425	NM_001005424 // Gm996 // predicted gene 996 // 2 A3|2 // 381353 /// ENSMUST00000114217	Gm996	NM_001005424	chr2	25430946	25437228	-	236.194	229.86	271.038	193.637	231.04	330.441	308.74	319.407	232.876	230.803	231.837	1.38247	1.38247	0.00718369	0.0390173
6781986	ENSMUST00000024543 // Hes7 // hairy and enhancer of split 7 (Drosophila) // 11 B3|11 37	Hes7	ENSMUST00000024543	chr11	68933926	68936935	+	288.975	338.885	347.409	307.728	319.874	387.545	443.411	414.538	322.342	340.469	331.281	1.29594	1.29594	0.00718389	0.0390173
6765596	NM_025343 // Rmnd1 // required for meiotic nuclear division 1 homolog (S. cerevisiae) /	Rmnd1	NM_025343	chr10	5914173	5965819	+	2553.75	2524.88	2738.94	2876.7	2669.77	1807.02	2164.62	1977.69	2402.97	2953.48	2664.04	0.740797	-1.3499	0.00718636	0.0390173
6796053	NM_172804 // Syt16 // synaptotagmin XVI // 12 C3|12 // 238266 /// ENSMUST00000110451 //	Syt16	NM_172804	chr12	75098758	75368891	+	216.442	223.841	222.293	200.129	215.467	253.867	275.088	264.265	236.063	218.099	226.903	1.22648	1.22648	0.00719239	0.0390224
6890424	NM_026251 // Patl2 // protein associated with topoisomerase II homolog 2 (yeast) // 2 F	Patl2	NM_026251	chr2	121945844	122011925	-	113.481	99.0922	114.979	104.263	107.753	136.465	130.919	133.663	115.454	108.663	112.007	1.24046	1.24046	0.00721045	0.0390804
6988302	NM_146781 // Olfr922 // olfactory receptor 922 // 9 A5|9 // 258777 /// ENSMUST000000510	Olfr922	NM_146781	chr9	38623090	38624025	+	69.7267	60.5515	80.4595	71.7576	70.2653	98.1026	91.1386	94.5568	73.5565	80.3965	76.9004	1.3457	1.3457	0.0072133	0.0390804
6973561	NR_028115 // Lilra6 // leukocyte immunoglobulin-like receptor, subfamily A (with TM dom	Lilra6	NR_028115	chr7	3858880	20625294	-	64.4389	73.2319	67.5517	75.9369	70.1431	85.587	109.419	96.7721	77.6014	66.528	71.8517	1.37964	1.37964	0.00723154	0.0391342
6905519	ENSMUST00000079300 // Arhgef26 // Rho guanine nucleotide exchange factor (GEF) 26 // 3	Arhgef26	ENSMUST00000079300	chr3	62141456	62144444	-	124.047	125.67	140.326	104.835	123.059	156.679	186.355	170.874	111.803	121.331	116.47	1.38855	1.38855	0.00723696	0.0391342
6836803	NM_001142968 // BC024139 // cDNA sequence BC024139 // 15 D3|15 // 271278 /// ENSMUST000	BC024139	NM_001142968	chr15	75945566	75968091	-	169.629	181.457	199.209	182.459	182.888	218.281	236.207	227.068	181.621	170.841	176.149	1.24156	1.24156	0.0072386	0.0391342
6921130	ENSMUST00000030169 // Stoml2 // stomatin (Epb7.2)-like 2 // 4|4 B1 // 66592 /// NM_0232	Stoml2	ENSMUST00000030169	chr4	43040563	43044731	-	1001.29	1040.38	994.943	1122.27	1038.51	784.919	799.138	791.996	885.421	1121.1	996.316	0.762626	-1.31126	0.00725194	0.039165
6866660	NM_025581 // Ska1 // spindle and kinetochore associated complex subunit 1 // 18 E2|18 /	Ska1	NM_025581	chr18	74319588	74375842	-	218.526	215.538	201.341	247.16	220.031	160.774	156.317	158.53	209.817	277.871	241.458	0.720487	-1.38795	0.00726165	0.039165
6878881	NM_146771 // Olfr1176 // olfactory receptor 1176 // 2 D|2 // 258767 /// ENSMUST00000057	Olfr1176	NM_146771	chr2	88173865	88180671	+	17.4734	17.5578	13.5549	18.8798	16.7392	23.6653	23.0272	23.3442	21.9716	22.6711	22.3187	1.39457	1.39457	0.00726296	0.039165
6861200	NM_009194 // Slc12a2 // solute carrier family 12, member 2 // 18 D3|18 32.0 cM // 20496	Slc12a2	NM_009194	chr18	57945997	58152708	+	1697.39	1573	1476.74	1726.46	1615.32	1349.58	1248.08	1297.84	1645.83	1673.9	1659.81	0.803489	-1.24457	0.00726479	0.039165
6838660	ENSMUST00000023710 // Krt71 // keratin 71 // 15 F2|15 63.2 cM // 56735 /// NM_019956 //	Krt71	ENSMUST00000023710	chr15	101560490	101573538	-	156.811	149.963	159.618	140.555	151.556	177.096	195.164	185.911	160.976	158.752	159.859	1.22668	1.22668	0.00728286	0.0392347
6953064	NM_175020 // Prss58 // protease, serine 58 // 6 B1|6 // 232717 /// ENSMUST00000063523 /	Prss58	NM_175020	chr6	40845284	40850386	-	42.2764	44.5935	51.2777	41.7977	44.8346	54.7296	62.6916	58.5757	45.5125	44.4916	44.9993	1.30648	1.30648	0.00729675	0.0392493
6998085	ENSMUST00000152594 // Zbtb38 // zinc finger and BTB domain containing 38 // 9 E3.3|9 //	Zbtb38	ENSMUST00000152594	chr9	96582852	96633169	-	1609.73	1503.59	1568.53	1691.4	1591.86	1865.05	2023.87	1942.77	1673.55	1561.7	1616.66	1.22048	1.22048	0.00730034	0.0392493
6921229	ENSMUST00000014174 // Pax5 // paired box gene 5 // 4 B1|4 20.7 cM // 18507	Pax5	ENSMUST00000014174	chr4	44531861	44741804	-	183.291	185.836	196.584	161.084	181.225	219.986	242.389	230.915	172.676	166.05	169.331	1.2742	1.2742	0.00730095	0.0392493
6788312	NM_019687 // Slc22a4 // solute carrier family 22 (organic cation transporter), member 4	Slc22a4	NM_019687	chr11	53796628	53842417	-	196.833	187.718	196.182	188.737	192.322	225.916	225.168	225.542	182.323	189.89	186.068	1.17273	1.17273	0.00732181	0.0393337
6785270	---	---	---	chr11	117345692	117350320	+	162.7	126.144	159.301	143.674	147.218	187.612	206.717	196.933	137.17	134.91	136.036	1.33769	1.33769	0.00732856	0.0393423
6956773	ENSMUST00000056623 // Tmem72 // transmembrane protein 72 // 6 E3|6 // 319776 /// NM_178	Tmem72	ENSMUST00000056623	chr6	116642668	116666920	-	182.003	217	204.267	180.426	195.326	240.263	266.623	253.099	201.167	185.898	193.382	1.29579	1.29579	0.00733674	0.039345
6780572	NM_178759 // Timd4 // T cell immunoglobulin and mucin domain containing 4 // 11 B1.1|11	Timd4	NM_178759	chr11	46622123	46657835	+	99.1348	99.0277	102.39	96.1643	99.1548	115.686	137.515	126.129	111.941	97.6596	104.557	1.27205	1.27205	0.00733936	0.039345
6839777	NM_009435 // Tssk1 // testis-specific serine kinase 1 // 16 A3|16 10.4 cM // 22114 ///	Tssk1	NM_009435	chr16	17894167	17898015	+	54.6724	80.8368	52.4096	54.1771	59.5182	93.3689	94.4141	93.89	72.5785	63.609	67.9457	1.5775	1.5775	0.00735881	0.0394217
6958845	NM_133234 // Bbc3 // BCL2 binding component 3 // 7 A2|7 // 170770 /// ENSMUST0000000215	Bbc3	NM_133234	chr7	16893890	16903673	+	181.087	187.39	228.899	169.841	190.581	268.153	254.516	261.245	201.548	181.706	191.37	1.37078	1.37078	0.00739088	0.0395587
6922293	NM_007443 // Ambp // alpha 1 microglobulin/bikunin // 4 C1-C3|4 30.6 cM // 11699 /// EN	Ambp	NM_007443	chr4	62804315	62815813	-	84.5352	80.936	80.0978	71.3138	79.0668	93.7996	116.096	104.354	74.0373	78.3798	76.1773	1.31982	1.31982	0.00739474	0.0395587
6950168	ENSMUST00000053708 // Klre1 // killer cell lectin-like receptor family E member 1 // 6	Klre1	ENSMUST00000053708	chr6	129527911	129535838	+	24.498	25.8672	25.016	26.4725	25.4521	30.8075	29.503	30.1482	26.0151	25.0811	25.544	1.18451	1.18451	0.00740238	0.0395719
6778116	NM_146285 // Olfr801 // olfactory receptor 801 // 10 D3|10 // 258282 /// ENSMUST0000007	Olfr801	NM_146285	chr10	129106617	129116993	-	14.7012	13.9549	17.4058	18.0233	15.9276	24.0883	22.084	23.0645	20.9226	27.0673	23.7975	1.44807	1.44807	0.0074392	0.0397409
6763520	ENSMUST00000035430 // Dars2 // aspartyl-tRNA synthetase 2 (mitochondrial) // 1 H2.1|1 /	Dars2	ENSMUST00000035430	chr1	162970732	163001279	-	705.876	627.982	599.066	656.049	646.058	500.841	542.579	521.293	605.877	614.76	610.302	0.806882	-1.23934	0.00747231	0.039858
6825311	NM_007549 // Blk // B lymphoid kinase // 14 D1|14 28.0 cM // 12143 /// ENSMUST000000145	Blk	NM_007549	chr14	63991673	64043652	-	113.97	115.451	122.549	105.874	114.307	135.04	164.195	148.906	114.541	103.295	108.772	1.30268	1.30268	0.00747245	0.039858
6925640	ENSMUST00000119423 // Hcrtr1 // hypocretin (orexin) receptor 1 // 4 D2.2|4 // 230777 //	Hcrtr1	ENSMUST00000119423	chr4	129807471	129828804	-	147.457	159.578	165.671	153.27	156.345	184.632	197.499	190.958	148.07	161.24	154.516	1.22138	1.22138	0.00747675	0.039858
6798403	NM_133762 // Ncapg2 // non-SMC condensin II complex, subunit G2 // 12 F2|12 // 76044 //	Ncapg2	NM_133762	chr12	117643871	117727059	+	670.21	691.79	594.35	658.838	652.756	531.988	478.134	504.343	635.104	751.693	690.946	0.772634	-1.29427	0.00748222	0.0398593
6992215	ENSMUST00000168532 // Cacna2d2 // calcium channel, voltage-dependent, alpha 2/delta sub	Cacna2d2	ENSMUST00000168532	chr9	107301563	107435805	+	300.237	284.353	321.387	292.467	299.3	378.639	362.227	370.341	303.927	267.353	285.054	1.23736	1.23736	0.007496	0.0398855
6769032	NM_001081695 // Dnmt3l // DNA (cytosine-5-)-methyltransferase 3-like // 10 C1|10 41.6 c	Dnmt3l	NM_001081695	chr10	77505088	77526360	+	89.8421	86.2947	97.0899	77.0669	87.2722	109.524	113.932	111.707	83.3951	85.1373	84.2614	1.27997	1.27997	0.00749756	0.0398855
6795401	NM_009216 // Sstr1 // somatostatin receptor 1 // 12 C1|12 23.0 cM // 20605 /// ENSMUST0	Sstr1	NM_009216	chr12	59246293	59317013	+	572.868	570.764	732.518	569.87	607.82	794.107	863.564	828.111	669.194	610.848	639.358	1.36242	1.36242	0.00750376	0.0398907
6993481	NM_022888 // Folr4 // folate receptor 4 (delta) // 9 A2|9 // 64931 /// ENSMUST000000344	Folr4	NM_022888	chr9	14677882	14723466	-	109.165	104.992	124.023	96.231	108.147	136.556	150.201	143.216	105.712	96.624	101.066	1.32427	1.32427	0.00751371	0.0399158
6969788	ENSMUST00000032969 // Pold3 // polymerase (DNA-directed), delta 3, accessory subunit //	Pold3	ENSMUST00000032969	chr7	107230440	107293784	-	2266.89	2218.09	2286.94	2383.56	2288.05	1725.62	1891.48	1806.65	2062.96	2496.34	2269.25	0.78959	-1.26648	0.00752295	0.0399372
6984904	NM_181990 // Cmtm1 // CKLF-like MARVEL transmembrane domain containing 1 // 8 D3|8 // 1	Cmtm1	NM_181990	chr8	106804948	106836669	-	53.7559	62.0487	62.5852	53.8278	57.8975	71.898	80.2239	75.9469	59.0007	51.0316	54.8717	1.31175	1.31175	0.00755084	0.0400242
6809372	NM_023472 // Ankra2 // ankyrin repeat, family A (RFXANK-like), 2 // 13 D1|13 // 68558 /	Ankra2	NM_023472	chr13	99033088	99044705	+	363.641	333.023	322.027	373.952	347.507	281.592	276.683	279.125	330.375	362.398	346.015	0.803224	-1.24498	0.00755503	0.0400242
6793639	NM_008747 // Ntsr2 // neurotensin receptor 2 // 12 A1.1|12 6.0 cM // 18217 /// ENSMUST0	Ntsr2	NM_008747	chr12	16660161	16675810	+	250.499	278.677	285.052	247.16	264.82	314.115	389.743	349.893	262.058	246.098	253.953	1.32124	1.32124	0.00755505	0.0400242
6884019	NM_028806 // Phactr3 // phosphatase and actin regulator 3 // 2 H4|2 // 74189 /// NM_001	Phactr3	NM_028806	chr2	177853904	178071196	+	254.214	267.16	297.357	238.989	263.577	344.49	327.361	335.817	246.493	253.521	249.982	1.27408	1.27408	0.00757291	0.0400683
6951180	NM_178797 // Far2 // fatty acyl CoA reductase 2 // 6 G3|6 // 330450 /// ENSMUST00000111	Far2	NM_178797	chr6	147995861	148172934	+	253.929	273.427	259.051	244.163	257.427	326.138	298.027	311.766	241.132	248.912	244.99	1.21109	1.21109	0.00757787	0.0400683
6923151	NM_206975 // Ifna14 // interferon, alpha 14 // 4 C4|4 // 404549 /// ENSMUST00000102808	Ifna14	NM_206975	chr4	88216908	88217832	-	176.243	181.619	152.603	212.276	179.447	256.595	278.754	267.445	205.571	153.544	177.663	1.49039	1.49039	0.00757911	0.0400683
6778722	NM_178259 // Abca13 // ATP-binding cassette, sub-family A (ABC1), member 13 // 11|11 A2	Abca13	NM_178259	chr11	9091969	9623397	+	57.8542	64.6572	57.9461	56.1354	59.0613	70.805	72.586	71.69	56.8583	56.5169	56.6872	1.21382	1.21382	0.00759731	0.0401368
6995722	NM_175562 // Rab39 // RAB39, member RAS oncogene family // 9 A5.3|9 // 270160 /// ENSMU	Rab39	NM_175562	chr9	53492127	53514569	-	125.608	111.32	109.376	111.841	114.361	135.794	149.259	142.368	112.912	122.136	117.434	1.24489	1.24489	0.0076092	0.0401601
6794181	NM_013709 // Sh3yl1 // Sh3 domain YSC-like 1 // 12 A2|12 // 24057 /// ENSMUST0000002099	Sh3yl1	NM_013709	chr12	31596543	31695981	+	334.031	306.627	304.538	328.646	318.193	265.508	266.953	266.23	297.6	311.114	304.281	0.836689	-1.19519	0.00761854	0.0401601
6772766	NM_001010831 // Taar9 // trace amine-associated receptor 9 // 10 A4|10 // 503558 /// EN	Taar9	NM_001010831	chr10	23828305	23829340	-	30.9318	36.0064	30.1547	35.4212	33.0255	46.0545	45.9209	45.9878	46.624	35.1529	40.4843	1.39249	1.39249	0.0076212	0.0401601
6890386	NM_080459 // Strc // stereocilin // 2 E5|2 // 140476 /// ENSMUST00000038389 // Strc //	Strc	NM_080459	chr2	121189471	121212880	-	127.55	117.807	137.593	112.899	123.605	151.419	165.956	158.521	125.241	116.503	120.793	1.28249	1.28249	0.00762819	0.0401601
7015363	NM_183015 // Ccnb3 // cyclin B3 // X A2-A3|X // 209091 /// ENSMUST00000115752 // Ccnb3	Ccnb3	NM_183015	chrX	6556778	6624276	-	18.1872	20.2799	23.5467	18.8032	20.1025	25.1593	32.56	28.6216	24.1981	22.3352	23.2479	1.42378	1.42378	0.00763234	0.0401601
6875637	NM_153511 // Il1f9 // interleukin 1 family, member 9 // 2 A3|2 10.25 cM // 215257 /// E	Il1f9	NM_153511	chr2	24042002	24054714	+	51.3001	62.1051	66.7271	51.2464	57.4518	85.1196	75.8801	80.3669	65.1494	72.7921	68.865	1.39887	1.39887	0.0076349	0.0401601
6798933	NM_173417 // Kcns3 // potassium voltage-gated channel, delayed-rectifier, subfamily S,	Kcns3	NM_173417	chr12	11097008	11157926	-	445.583	417.323	434.009	445.821	435.527	522.602	524.184	523.393	457.802	409.29	432.867	1.20175	1.20175	0.0076385	0.0401601
6966873	NM_146189 // Mybpc2 // myosin binding protein C, fast-type // 7 B4|7 // 233199 /// ENSM	Mybpc2	NM_146189	chr7	51757069	51780024	-	99.8721	109.655	116.121	96.7876	105.33	128.056	138.049	132.958	99.7649	97.286	98.5176	1.26231	1.26231	0.00765178	0.0401766
6803070	NM_030172 // 2610021K21Rik // RIKEN cDNA 2610021K21 gene // 12|12 F1 // 78767 /// ENSMU	2610021K21Rik	NM_030172	chr12	100931267	101125333	-	430.488	332.495	388.815	432.001	393.773	268.385	308.21	287.608	371.189	395.705	383.249	0.730397	-1.36912	0.00765264	0.0401766
6937884	NM_172153 // Lcorl // ligand dependent nuclear receptor corepressor-like // 5 B3|5 // 2	Lcorl	NM_172153	chr5	46088423	46313190	-	451.093	481.456	450.471	562.426	484.328	367.745	380.526	374.079	471.081	479.238	475.144	0.772372	-1.29471	0.0076574	0.0401766
6792079	NM_011268 // Rgs9 // regulator of G-protein signaling 9 // 11 E1|11 70.0 cM // 19739 //	Rgs9	NM_011268	chr11	109086675	109159475	-	272.87	266.363	305.769	237.953	269.668	355.311	345.442	350.342	271.996	292.457	282.041	1.29916	1.29916	0.00766716	0.0402002
6961987	NM_145150 // Prc1 // protein regulator of cytokinesis 1 // 7 D3|7 38.0 cM // 233406 ///	Prc1	NM_145150	chr7	87439346	87461092	+	2499.81	2677	2253.89	2390.17	2450.4	2062.67	1762.74	1906.75	2207.2	2370.54	2287.41	0.778179	-1.28505	0.00770072	0.0403202
6839015	ENSMUST00000006136 // Dnase1 // deoxyribonuclease I // 16 A1-3|16 1.7 cM // 13419 /// N	Dnase1	ENSMUST00000006136	chr16	4003541	4040024	+	76.6689	87.4842	87.6134	87.3303	84.639	100.085	109.345	104.612	90.2584	87.4666	88.8519	1.23599	1.23599	0.00770359	0.0403202
6925840	NM_145553 // Fam76a // family with sequence similarity 76, member A // 4 D2.3|4 // 2307	Fam76a	NM_145553	chr4	132455135	132478473	-	653.829	859.039	747.531	825.326	767.243	579.526	565.119	572.277	770.451	833.212	801.217	0.745888	-1.34068	0.00771063	0.0403202
6783033	NR_036452 // E230016K23Rik // RIKEN cDNA E230016K23 gene // 11 C|11 // 100504464 /// NR	E230016K23Rik	NR_036452	chr11	83395568	83437187	+	103.015	94.6657	111.594	104.134	103.177	125.518	132.639	129.029	100.593	112.301	106.286	1.25056	1.25056	0.00771149	0.0403202
6963065	NM_146754 // Olfr556 // olfactory receptor 556 // 7 E3|7 // 258749 /// ENSMUST000000982	Olfr556	NM_146754	chr7	109818371	109819410	+	171.392	200.823	216.982	179.272	191.288	293.832	242.493	266.93	194.816	165.49	179.556	1.39545	1.39545	0.00771884	0.0403202
6931217	NM_008453 // Klf3 // Kruppel-like factor 3 (basic) // 5 C3.1|5 // 16599 /// ENSMUST0000	Klf3	NM_008453	chr5	65194628	65224139	+	2373.66	2426.4	2387.03	2540.51	2430.94	2094.66	1993.93	2043.75	2349.11	2522.61	2434.31	0.840663	-1.18954	0.00772548	0.0403202
6936939	ENSMUST00000165512 // Mnx1 // motor neuron and pancreas homeobox 1 // 5 B1|5 // 15285 /	Mnx1	ENSMUST00000165512	chr5	29799597	29857472	-	127.224	117.612	140.566	127.651	128.006	168.415	177.807	173.048	139.959	107.832	122.85	1.35187	1.35187	0.00772956	0.0403202
6935927	NM_020010 // Cyp51 // cytochrome P450, family 51 // 5 A2|5 1.2 cM // 13121 /// ENSMUST0	Cyp51	NM_020010	chr5	4080167	4104736	-	922.446	958.125	957.096	910.106	936.704	780.93	596.108	682.289	859.367	1049.8	949.826	0.728393	-1.37288	0.00774191	0.0403202
6920149	NM_008899 // Pou3f2 // POU domain, class 3, transcription factor 2 // 4 A3|4 6.3 cM //	Pou3f2	NM_008899	chr4	22379746	22426021	-	203.924	227.509	244.278	222.324	224.044	272.946	311.052	291.376	210.04	242.288	225.589	1.30053	1.30053	0.00774247	0.0403202
6879925	NM_001048139 // Bdnf // brain derived neurotrophic factor // 2 E3|2 62.0 cM // 12064 //	Bdnf	NM_001048139	chr2	109478322	109581943	+	147.61	132.961	145.429	125.271	137.511	168.133	175.369	171.712	132.354	140.889	136.555	1.24873	1.24873	0.00774799	0.0403202
6924916	NM_146713 // Olfr1342 // olfactory receptor 1342 // 4 D2|4 // 258708 /// ENSMUST0000006	Olfr1342	NM_146713	chr4	118362112	118363179	-	60.8557	42.2038	68.6258	46.571	53.5261	80.0389	100.333	89.6132	88.8229	85.0188	86.8997	1.6742	1.6742	0.00775032	0.0403202
6900970	NM_010171 // F3 // coagulation factor III // 3 G1|3 50.0 cM // 14066 /// ENSMUST0000002	F3	NM_010171	chr3	121426079	121442986	+	1266.56	1208.41	1140.38	1267.53	1219.61	956.221	1046.53	1000.36	1193.1	1267	1229.54	0.820244	-1.21915	0.00775333	0.0403202
6752156	NM_001174170 // Serpinb2 // serine (or cysteine) peptidase inhibitor, clade B, member 2	Serpinb2	NM_001174170	chr1	109407675	109422169	+	32.4168	37.9424	41.14	35.8023	36.6873	45.1352	54.7285	49.7009	37.7619	34.6213	36.1574	1.35471	1.35471	0.00776221	0.0403331
6832256	NM_007546 // Bik // BCL2-interacting killer // 15 E1|15 // 12124 /// ENSMUST00000016902	Bik	NM_007546	chr15	83345911	83375062	+	240.973	253.077	275.487	252.978	255.328	297.2	331.92	314.08	247.977	257.491	252.689	1.2301	1.2301	0.00777505	0.0403331
6906381	NM_023624 // Lrat // lecithin-retinol acyltransferase (phosphatidylcholine-retinol-O-ac	Lrat	NM_023624	chr3	82684102	82707896	-	135.324	110.404	131.792	130.939	126.716	161.368	160.199	160.782	128.179	124.779	126.468	1.26885	1.26885	0.00777531	0.0403331
6924583	ENSMUST00000102721 // Slc5a9 // solute carrier family 5 (sodium/glucose cotransporter),	Slc5a9	ENSMUST00000102721	chr4	111547993	111575503	-	244.941	245.974	251.046	228.655	242.505	276.94	326.885	300.879	196.328	199.093	197.706	1.24071	1.24071	0.0077846	0.0403331
6916947	ENSMUST00000059667 // Hpcal4 // hippocalcin-like 4 // 4 D2.2|4 // 170638 /// NM_174998	Hpcal4	ENSMUST00000059667	chr4	122850989	122871944	+	112.594	97.6007	107.164	94.5424	102.721	136.026	123.651	129.691	92.1588	94.6211	93.3818	1.26255	1.26255	0.00778937	0.0403331
6964657	NM_198017 // Fam175b // family with sequence similarity 175, member B // 7 F3|7 // 1093	Fam175b	NM_198017	chr7	140050945	140076794	+	992.415	1138.64	1057.84	1019.06	1050.6	859.39	849.553	854.461	974.501	1079.54	1025.7	0.813329	-1.22952	0.00780556	0.0403331
6850847	NM_152823 // Unc5cl // unc-5 homolog C (C. elegans)-like // 17 C|17 // 76589 /// ENSMUS	Unc5cl	NM_152823	chr17	48594246	48679029	+	63.4527	63.7123	72.0182	63.3653	65.5376	78.8632	82.1768	80.503	71.006	65.7118	68.3079	1.22834	1.22834	0.00780975	0.0403331
6833332	NM_025487 // 1700011A15Rik // RIKEN cDNA 1700011A15 gene // 15 F2|15 // 66322 /// ENSMU	1700011A15Rik	NM_025487	chr15	101278195	101284334	+	277.442	287.435	326.822	262.663	287.644	360.384	369.141	364.736	289.185	290.926	290.054	1.26801	1.26801	0.00781578	0.0403331
7014602	NM_010951 // Gpr143 // G protein-coupled receptor 143 // X F2-F3|X 65.0 cM // 18241 ///	Gpr143	NM_010951	chrX	149216529	149243189	+	74.9803	85.9538	87.2292	77.0963	81.1382	107.274	104.8	106.03	91.5704	75.0578	82.904	1.30677	1.30677	0.00781782	0.0403331
6788928	NM_133208 // Zfp287 // zinc finger protein 287 // 11 B2|11 // 170740 /// ENSMUST0000014	Zfp287	NM_133208	chr11	62520778	62545407	-	497.599	532.741	512.522	475.704	504.21	416.652	368.385	391.775	479.651	577.177	526.157	0.77701	-1.28698	0.00781818	0.0403331
7016369	NM_001004193 // Rhox8 // reproductive homeobox 8 // X A3.3|X // 434768 /// ENSMUST00000	Rhox8	NM_001004193	chrX	35201900	35232600	-	118.404	123.933	120.748	117.86	120.213	150.964	137.954	144.312	118.35	128.689	123.411	1.20047	1.20047	0.00782712	0.0403331
6858033	NM_199251 // Kcnk12 // potassium channel, subfamily K, member 12 // 17 E4|17 // 210741	Kcnk12	NM_199251	chr17	88131785	88225877	-	344.779	315.702	343.37	292.913	323.468	442.569	390.389	415.663	331.125	299.344	314.835	1.28502	1.28502	0.00783256	0.0403331
6883098	NM_026797 // Dbndd2 // dysbindin (dystrobrevin binding protein 1) domain containing 2 /	Dbndd2	NM_026797	chr2	164311613	164318803	+	128.56	119.678	139.943	123.968	127.819	149.752	186.284	167.021	130.242	128.145	129.189	1.30671	1.30671	0.00783376	0.0403331
6751647	NM_177587 // Aqp12 // aquaporin 12 // 1 D|1 // 208760 /// NM_001159658 // Aqp12 // aqua	Aqp12	NM_177587	chr1	94886487	94908846	+	146.115	159.157	166.75	158.871	157.546	182.638	212.207	196.867	148.629	155.104	151.832	1.24959	1.24959	0.00784874	0.0403331
6845995	NM_172455 // Tmprss7 // transmembrane serine protease 7 // 16 B5|16 // 208171 /// ENSMU	Tmprss7	NM_172455	chr16	45656430	45693767	-	56.2695	56.8453	49.8828	49.5502	53.0261	67.8036	69.5882	68.6901	58.7294	48.8152	53.5435	1.2954	1.2954	0.00785226	0.0403331
6949299	NM_146759 // Olfr214 // olfactory receptor 214 // 6 F1|6 // 258754 /// ENSMUST000000602	Olfr214	NM_146759	chr6	116506418	116507407	+	50.2183	60.0978	57.6588	42.7058	52.2117	113.087	79.5257	94.8332	34.3851	55.5922	43.7212	1.81632	1.81632	0.00785381	0.0403331
6926495	ENSMUST00000102481 // Cela2a // chymotrypsin-like elastase family, member 2A // 4 E1 //	Cela2a	ENSMUST00000102481	chr4	141370880	141402252	-	309.527	343.715	345.389	313.952	327.731	381.091	429.112	404.389	309.222	310.692	309.956	1.23391	1.23391	0.00785383	0.0403331
6813730	NM_199148 // BC051665 // cDNA sequence BC051665 // 13 B2|13 // 218275 /// ENSMUST000001	BC051665	NM_199148	chr13	60883254	60887710	-	48.1823	35.3557	42.6499	36.1918	40.2688	61.1021	55.2189	58.0861	39.1104	32.8634	35.8512	1.44246	1.44246	0.00785884	0.0403331
6969991	NM_146821 // Olfr629 // olfactory receptor 629 // 7 E3|7 // 258818 /// ENSMUST000000513	Olfr629	NM_146821	chr7	110888808	110889752	-	46.1209	42.8377	72.2798	53.8401	52.6576	86.2403	95.1446	90.5831	76.9516	58.585	67.1432	1.72023	1.72023	0.0078593	0.0403331
6962742	NM_153591 // Nars2 // asparaginyl-tRNA synthetase 2 (mitochondrial)(putative) // 7 E1|7	Nars2	NM_153591	chr7	104100035	104219942	+	768.052	713.916	700.927	706.571	721.882	615.886	602.752	609.284	730.348	745.653	737.961	0.84402	-1.18481	0.00786134	0.0403331
6788291	NM_008355 // Il13 // interleukin 13 // 11 B1.3|11 29.0 cM // 16163 /// ENSMUST000000206	Il13	NM_008355	chr11	53432396	53448204	-	123.889	122.419	122.729	123.018	123.012	150.625	139.159	144.779	128.576	134.117	131.318	1.17694	1.17694	0.00786853	0.0403429
6998097	ENSMUST00000055433 // Spsb4 // splA/ryanodine receptor domain and SOCS box containing 4	Spsb4	ENSMUST00000055433	chr9	96802296	96919636	-	270.597	289.948	375.269	252.35	293.594	416.433	450.839	433.293	334.191	305.755	319.657	1.47583	1.47583	0.0078854	0.0403792
6870980	NM_178650 // Tbc1d10c // TBC1 domain family, member 10c // 19 A|19 // 108995 /// ENSMUS	Tbc1d10c	NM_178650	chr19	4183411	4191750	-	238.918	244.061	264.745	256.007	250.73	295.026	319.356	306.95	264.201	238.501	251.022	1.22422	1.22422	0.00788617	0.0403792
6871240	NM_009203 // Slc22a12 // solute carrier family 22 (organic anion/cation transporter), m	Slc22a12	NM_009203	chr19	6474231	6543067	-	373.657	390.073	433.852	396.457	397.913	485.807	483.074	484.439	409.423	388.837	398.996	1.21745	1.21745	0.00789568	0.0403925
6854787	NM_011575 // Tff3 // trefoil factor 3, intestinal // 17 A3.3|17 17.0 cM // 21786 /// EN	Tff3	NM_011575	chr17	31262260	31266556	-	109.856	139.426	115.668	135.74	124.53	157.877	175.955	166.671	111.936	108.88	110.398	1.33841	1.33841	0.00789934	0.0403925
6842941	---	---	---	chr16	87784330	87831730	+	30.8344	38.5102	37.5266	34.8189	35.2932	44.4959	46.0248	45.2539	36.8627	36.5979	36.7301	1.28223	1.28223	0.00790463	0.0403926
6882441	NM_025990 // Bpifa5 // BPI fold containing family A, member 5 // 2 H1|2 // 67135 /// EN	Bpifa5	NM_025990	chr2	153988342	153994179	+	83.0737	73.6391	89.6288	73.056	79.5555	106.836	105.436	106.134	90.5831	75.3889	82.6378	1.33409	1.33409	0.00791055	0.0403958
6994883	NM_019465 // Crtam // cytotoxic and regulatory T cell molecule // 9 A5.1|9 20.5 cM // 5	Crtam	NM_019465	chr9	40780875	40812669	-	68.4657	70.8276	72.9214	70.8502	70.7486	81.4781	104.787	92.4006	76.934	70.4369	73.6141	1.30604	1.30604	0.00793287	0.0404575
6811874	NM_008232 // Hdgfl1 // hepatoma derived growth factor-like 1 // 13 A3.1|13 // 15192 ///	Hdgfl1	NM_008232	chr13	26860052	26881535	-	167.601	230.925	207.896	152.24	187.081	290.733	275.835	283.187	192.028	183.079	187.5	1.5137	1.5137	0.00793427	0.0404575
6767387	NM_016898 // Cd164 // CD164 antigen // 10 B2|10 25.0 cM // 53599 /// ENSMUST00000019962	Cd164	NM_016898	chr10	41239240	41257624	+	6875.74	6557.82	6205.79	7164.75	6691.44	5612.78	5265.66	5436.64	6459.02	6981.88	6715.13	0.81245	-1.23085	0.00794181	0.0404575
6938093	NR_027710 // Ppargc1a // peroxisome proliferative activated receptor, gamma, coactivato	Ppargc1a	NR_027710	chr5	51750460	51958944	-	509.642	576.242	594.425	575.583	563.011	413.619	446.068	429.537	510.476	630.42	567.285	0.762926	-1.31074	0.00794612	0.0404575
6915559	ENSMUST00000141248 // Fggy // FGGY carbohydrate kinase domain containing // 4 C5|4 // 7	Fggy	ENSMUST00000141248	chr4	95193309	95593623	+	402.769	366.734	386.276	372.116	381.722	230.722	233.576	232.145	327.051	184.576	245.694	0.608153	-1.64432	0.0079491	0.0404575
6921656	ENSMUST00000107670 // Olfr273 // olfactory receptor 273 // 4 B2-C2|4 // 258821 /// ENSM	Olfr273	ENSMUST00000107670	chr4	52868430	52871318	-	28.7941	32.8629	27.2979	27.7815	29.1055	34.9718	47.159	40.6108	32.6142	34.3996	33.4951	1.3953	1.3953	0.00796368	0.0405048
6827978	ENSMUST00000039118 // Zic5 // zinc finger protein of the cerebellum 5 // 14 E5|14 // 65	Zic5	ENSMUST00000039118	chr14	122806220	122864871	-	336.728	349.275	404.361	309.885	348.422	483.848	439.381	461.079	301.165	316.956	308.961	1.32334	1.32334	0.00797522	0.0405217
6831157	NM_001081409 // Phf20l1 // PHD finger protein 20-like 1 // 15 D2|15 // 239510 /// ENSMU	Phf20l1	NM_001081409	chr15	66409126	66476797	+	1719.17	1661.53	1606.61	1762.61	1686.48	1417.86	1369.28	1393.31	1585.04	1770.45	1675.18	0.826207	-1.21035	0.00798148	0.0405217
6899747	NM_013549 // Hist2h2aa1 // histone cluster 2, H2aa1 // 3 F1-F2|3 45.2 cM // 15267 /// N	Hist2h2aa1	NM_013549	chr3	96049430	96049892	+	1704.46	2002.38	1998.77	2057.53	1935.51	1027.77	1572.23	1271.13	1878.02	2056.11	1965.12	0.656743	-1.52267	0.00798292	0.0405217
6936930	NM_020295 // Lmbr1 // limb region 1 // 5 B1|5 15.8 cM // 56873 /// ENSMUST00000055195 /	Lmbr1	NM_020295	chr5	29556398	29557166	-	65.2466	51.9355	36.2837	34.1655	45.2721	22.1254	24.9623	23.501	35.4888	42.9156	39.0259	0.519107	-1.92638	0.00799619	0.0405622
6880587	ENSMUST00000124187 // Haus2 // HAUS augmin-like complex, subunit 2 // 2|2 F1 // 66296 /	Haus2	ENSMUST00000124187	chr2	120435129	120447294	+	677.093	764.726	763.757	813.602	753.148	603.283	516.463	558.185	669.658	825.08	743.32	0.741138	-1.34928	0.00801444	0.0405854
6885462	NM_001039653 // Lhx3 // LIM homeobox protein 3 // 2 A2-C1|2 16.0 cM // 16871 /// ENSMUS	Lhx3	NM_001039653	chr2	26055746	26063807	-	202.471	213.584	209.485	174.253	199.327	244.98	262.909	253.786	190.298	189.304	189.801	1.27322	1.27322	0.0080168	0.0405854
6991383	NM_001142916 // Plod2 // procollagen lysine, 2-oxoglutarate 5-dioxygenase 2 // 9 E3.3|9	Plod2	NM_001142916	chr9	92437067	92590272	+	2225.17	2247.65	2261.09	2583.66	2324.98	1907.01	1845.89	1876.2	2261.4	2453.12	2355.31	0.806991	-1.23917	0.00801862	0.0405854
6965128	ENSMUST00000106049 // Odf3 // outer dense fiber of sperm tails 3 // 7|7 F5 // 69287 ///	Odf3	ENSMUST00000106049	chr7	148033689	148036906	+	139.228	140.773	172.129	120.574	142.016	195.643	201.886	198.74	140.81	128.425	134.475	1.39941	1.39941	0.008022	0.0405854
6780368	NM_148673 // Slu7 // SLU7 splicing factor homolog (S. cerevisiae) // 11 A5-B1.1|11 // 1	Slu7	NM_148673	chr11	43247233	43261483	+	1120.4	1186.17	992.188	1219.52	1126.08	912.575	829.656	870.132	1008.31	1109.5	1057.69	0.772693	-1.29417	0.00803304	0.0406036
[truncated: 15,243 more rows]
